# Supplementary material
Source: PubMed Central journal article supplement (PMC7664118)

Angiotensin-converting enzyme

K.EADNFFTS~~L~~GLLPVPEFWNK~~S~~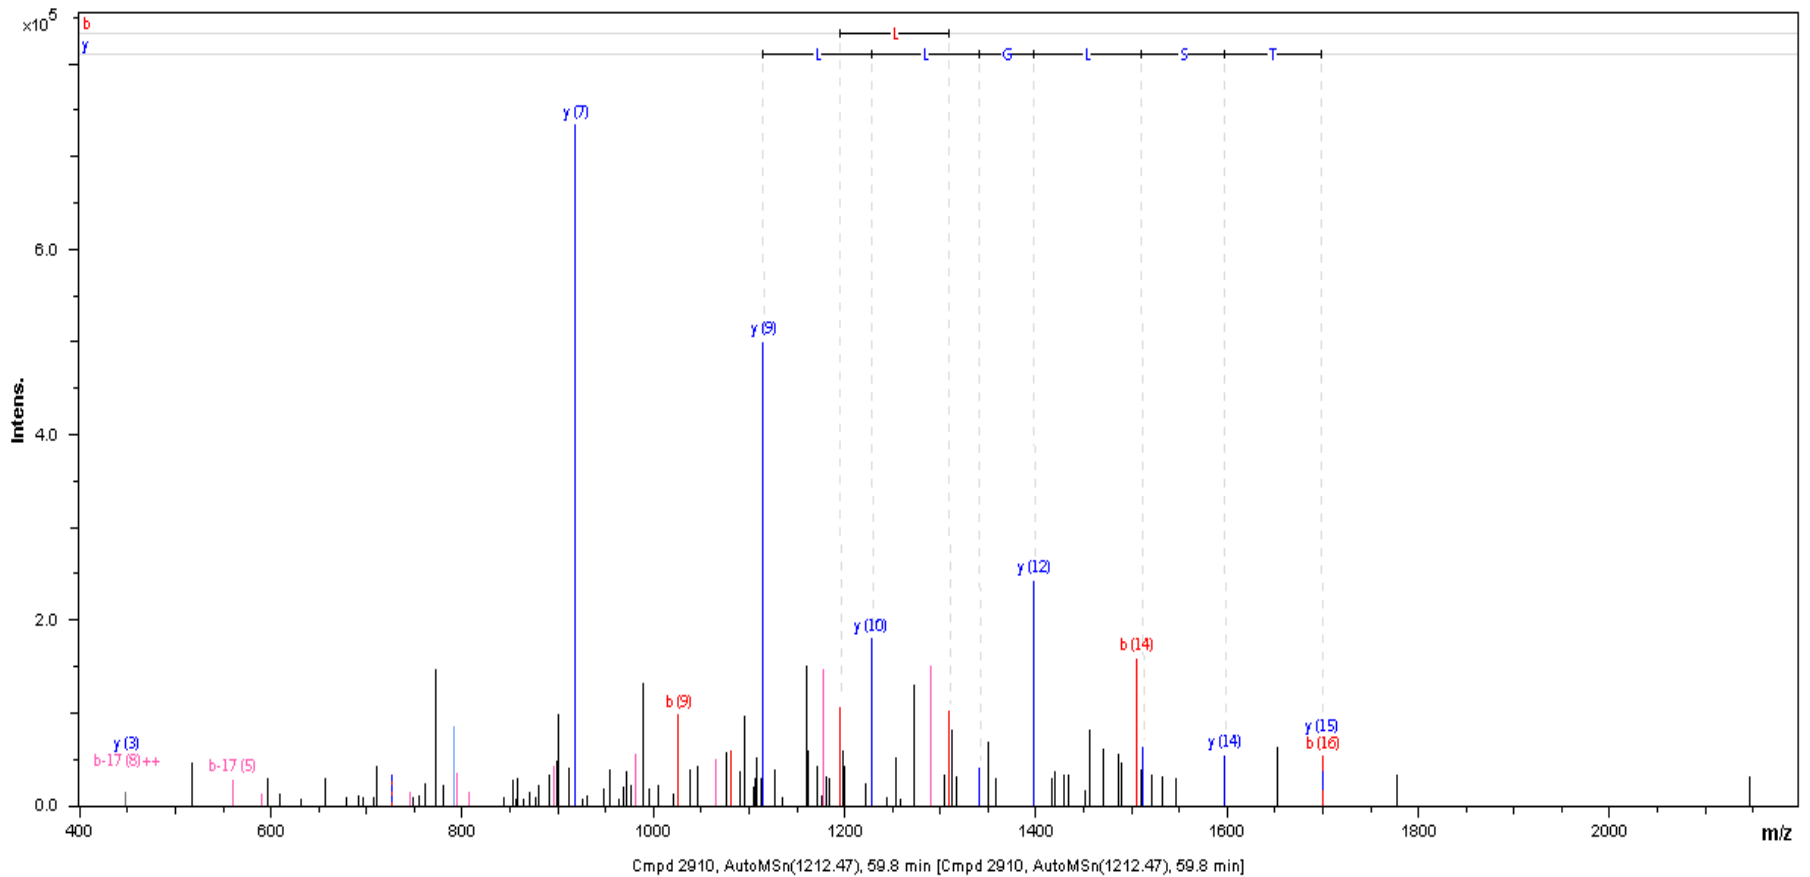

Angiotensin-converting enzyme

K.LITGQPNMSASAMMNYFKPLTEWLVTENR.\*

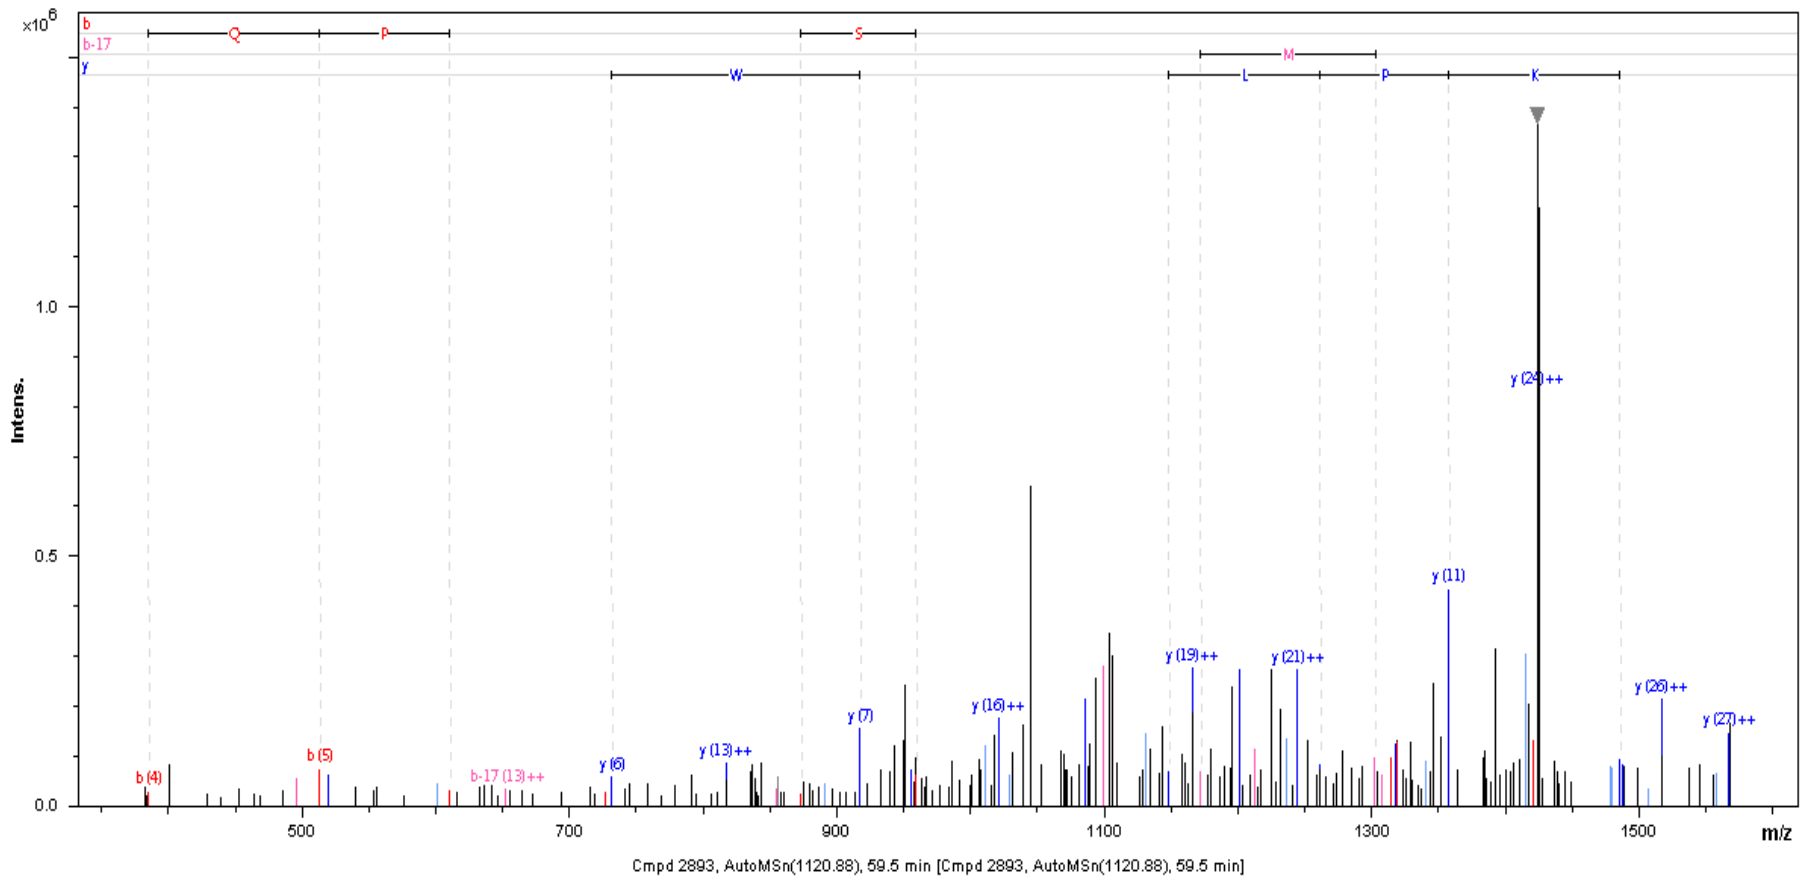

Angiotensin-converting enzyme

K.STEVSNHTLK.Y

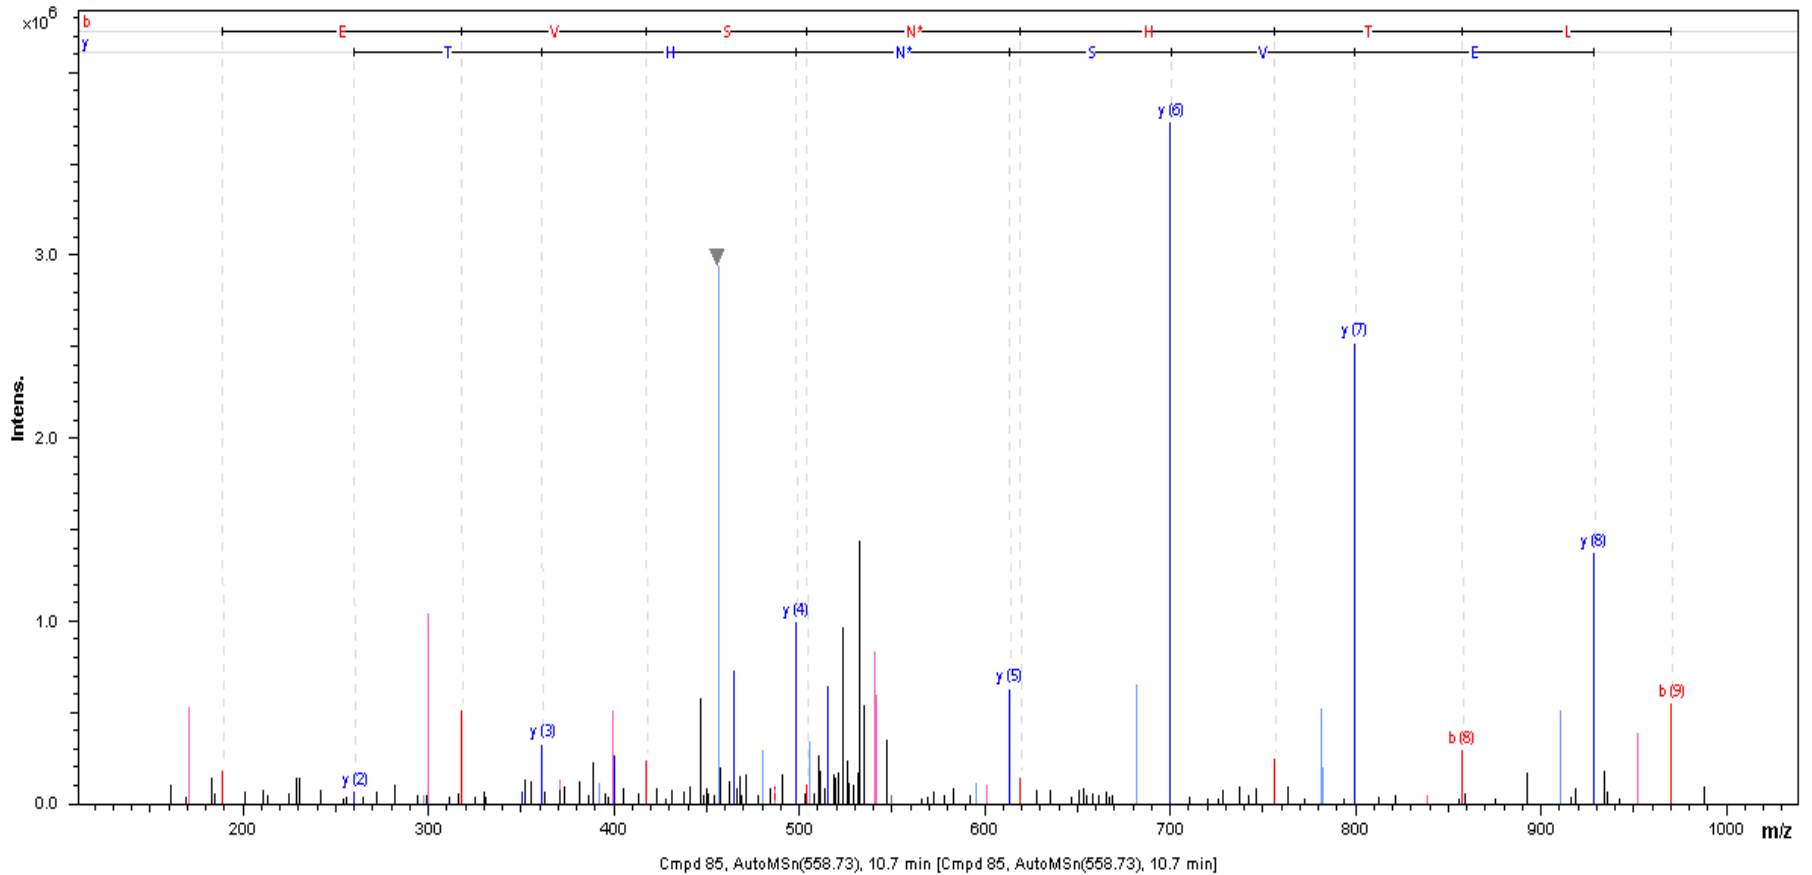

Angiotensin-converting enzyme

K.TFDVSNFQNSSIK.R

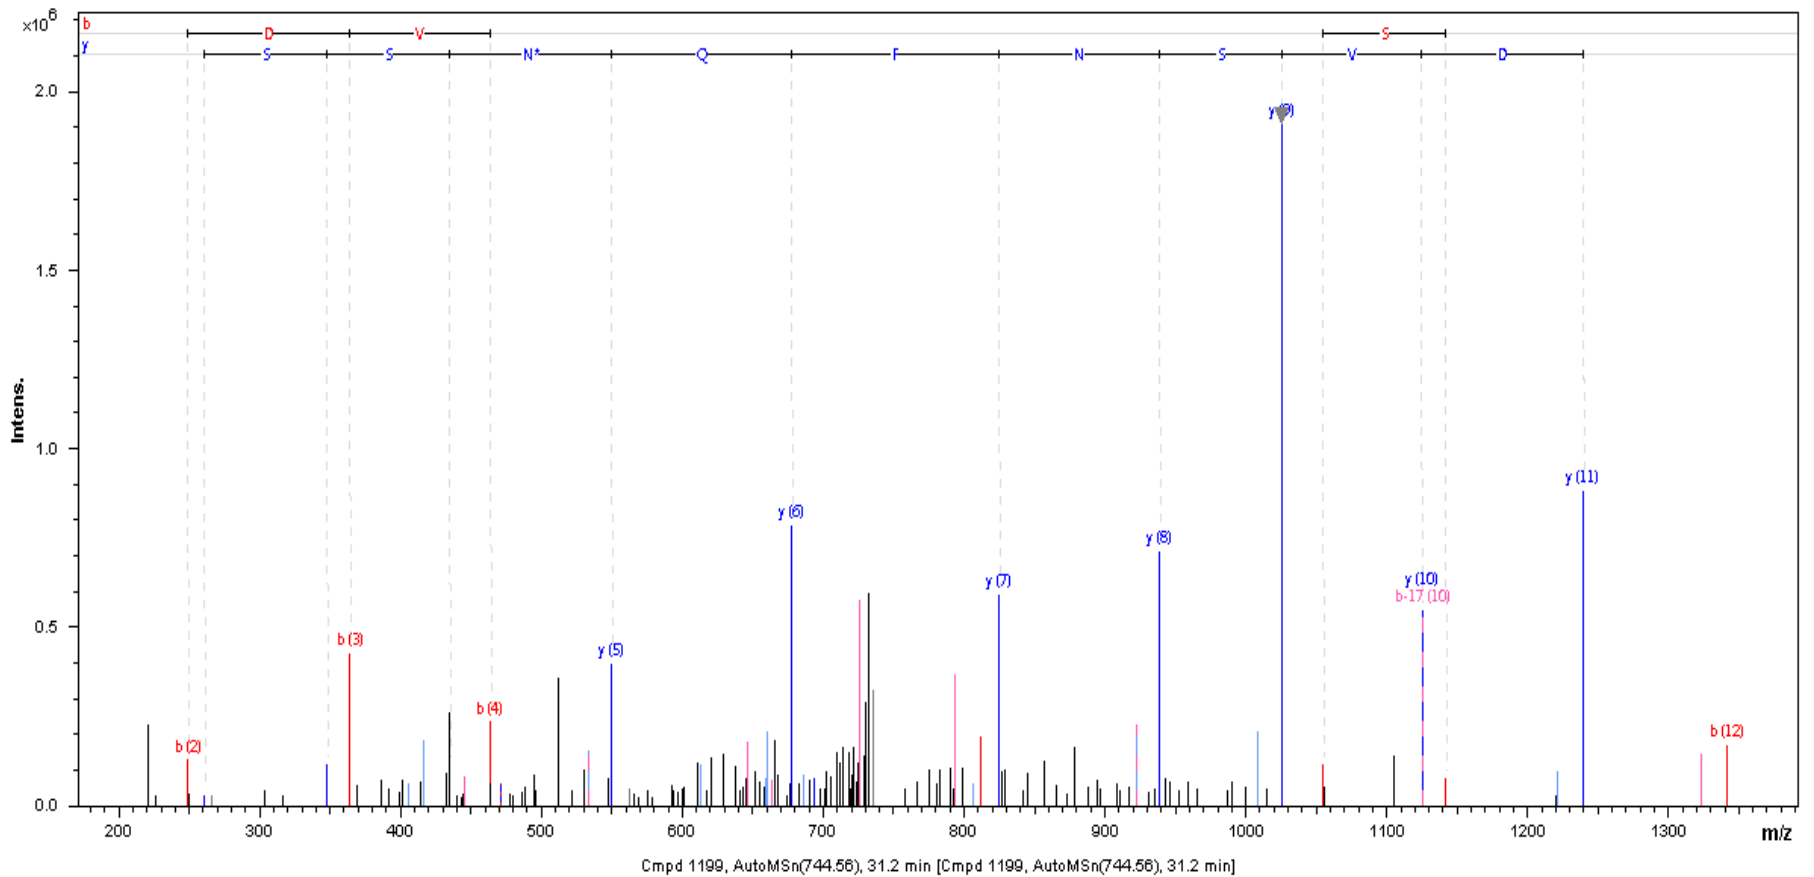

Aconitate hydratase, mitochondrial precursor

R.GHLDNISNLLIGAINIENGK.A \*

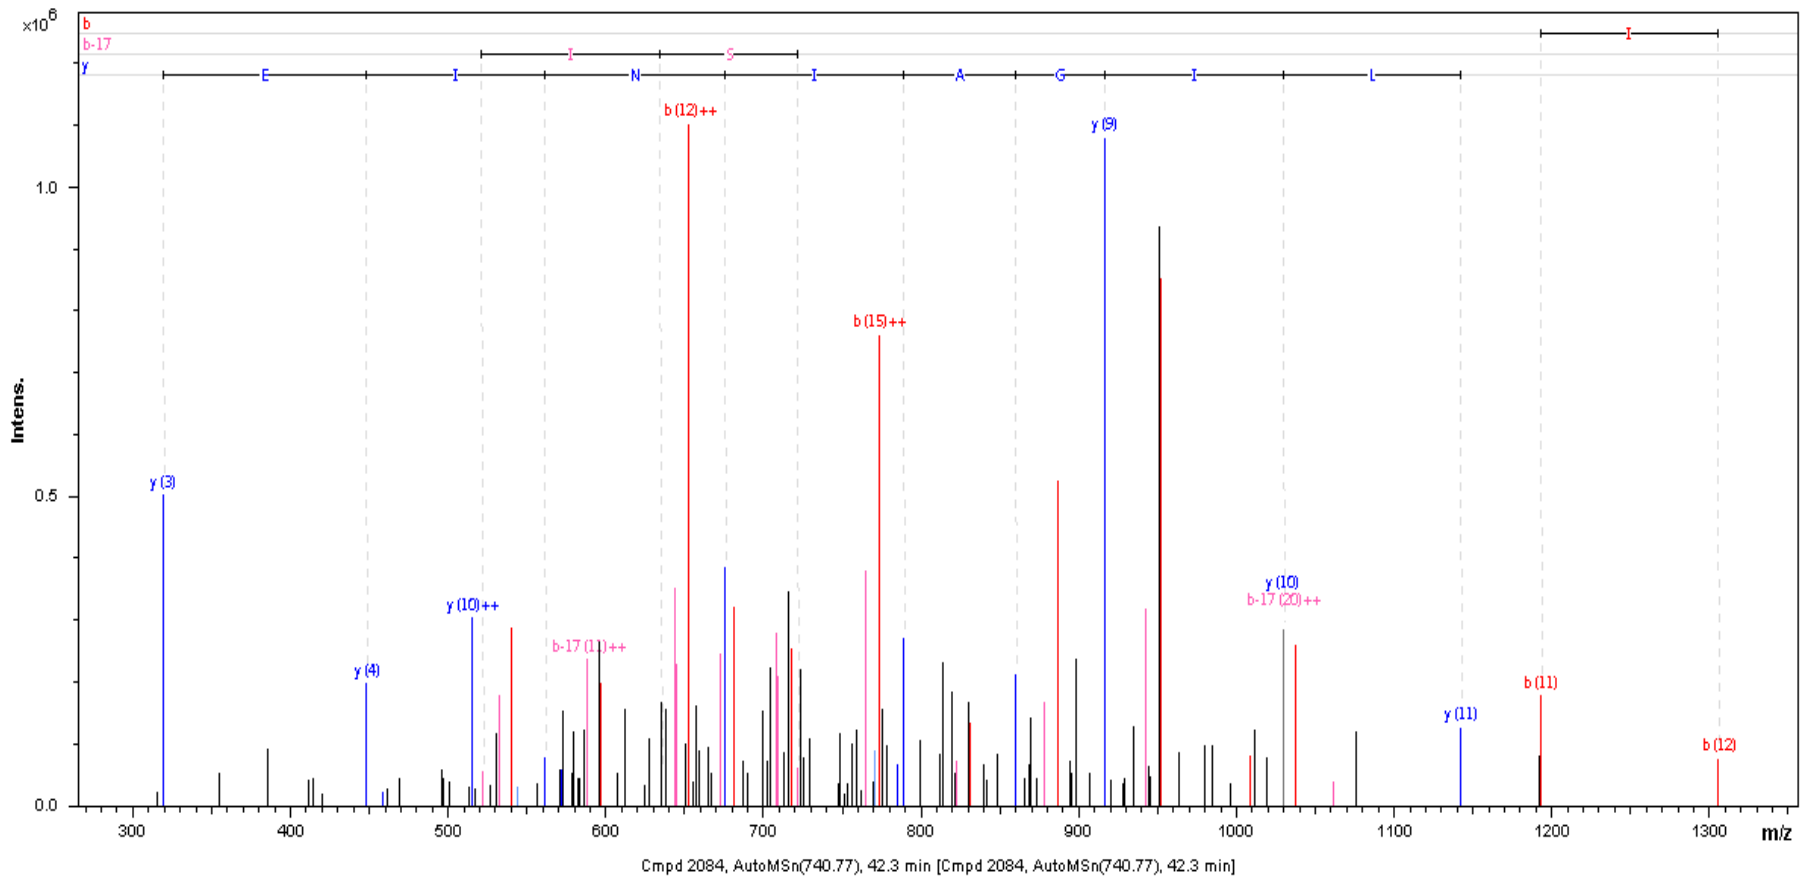

Acrosin precursor

R.VDLIDL<sup>u</sup>DLCN<sup>u</sup>STQWYNGR.V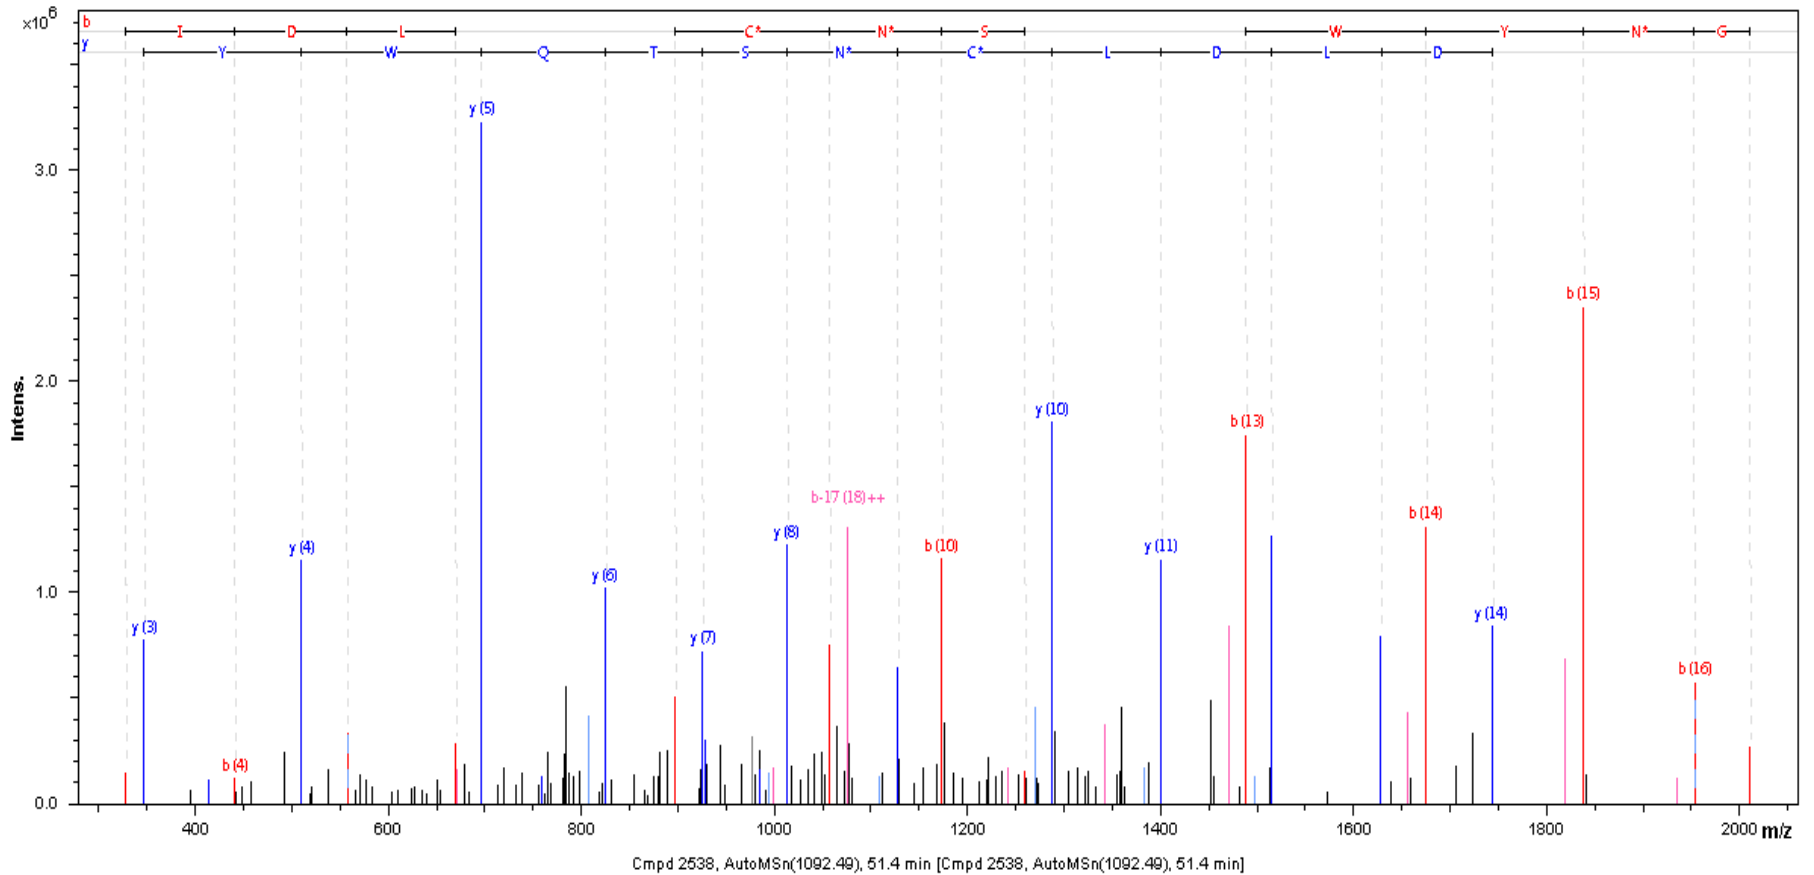

ADAM 26A

R.KEKNECDLPEWCNGTSAECPGDVYK.A

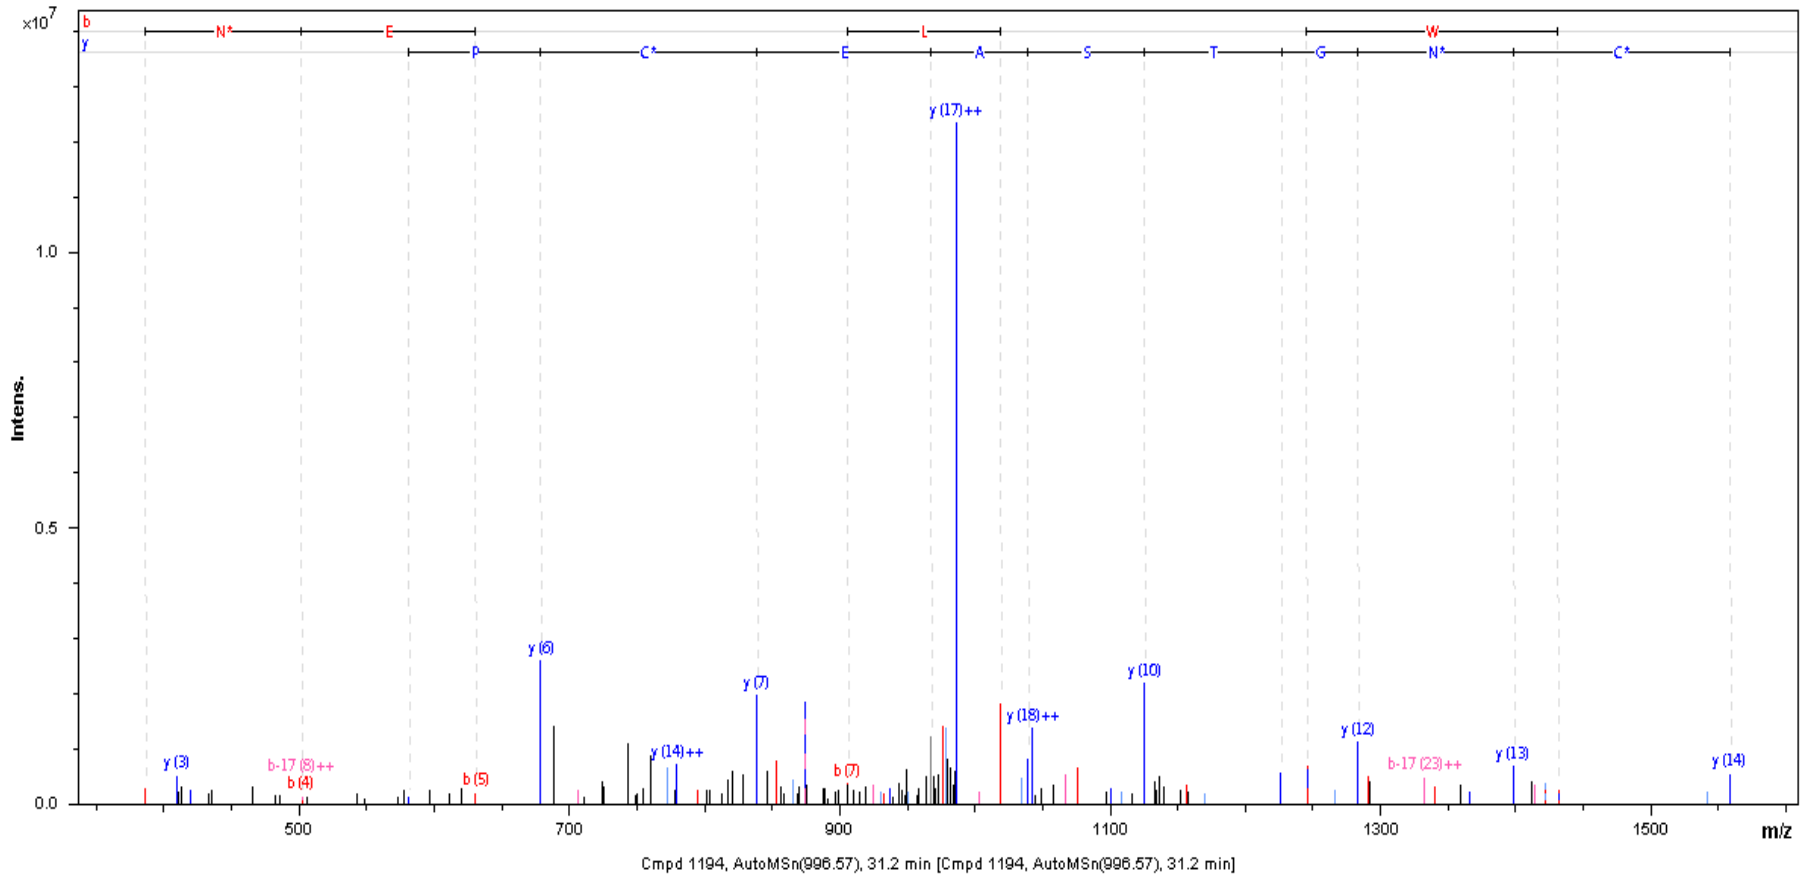

ADAM 24

K.LSNCSYEVLWAHMINK.S

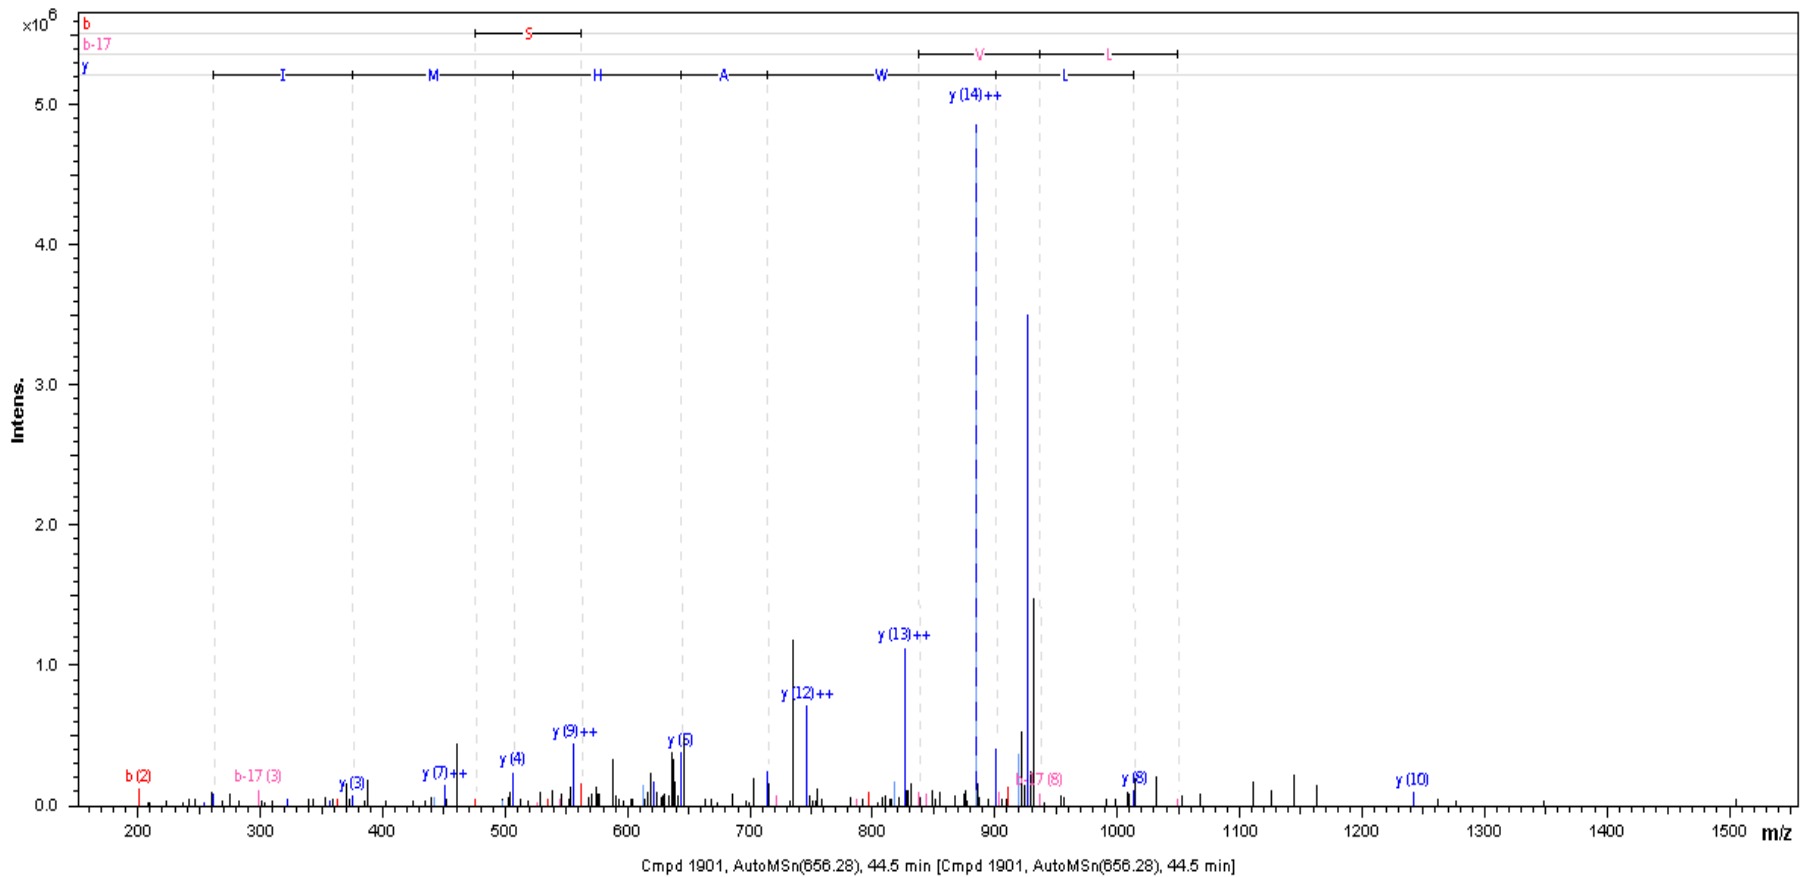



ADAM 2 precursor

R.AFSNCSMEDFSK.F

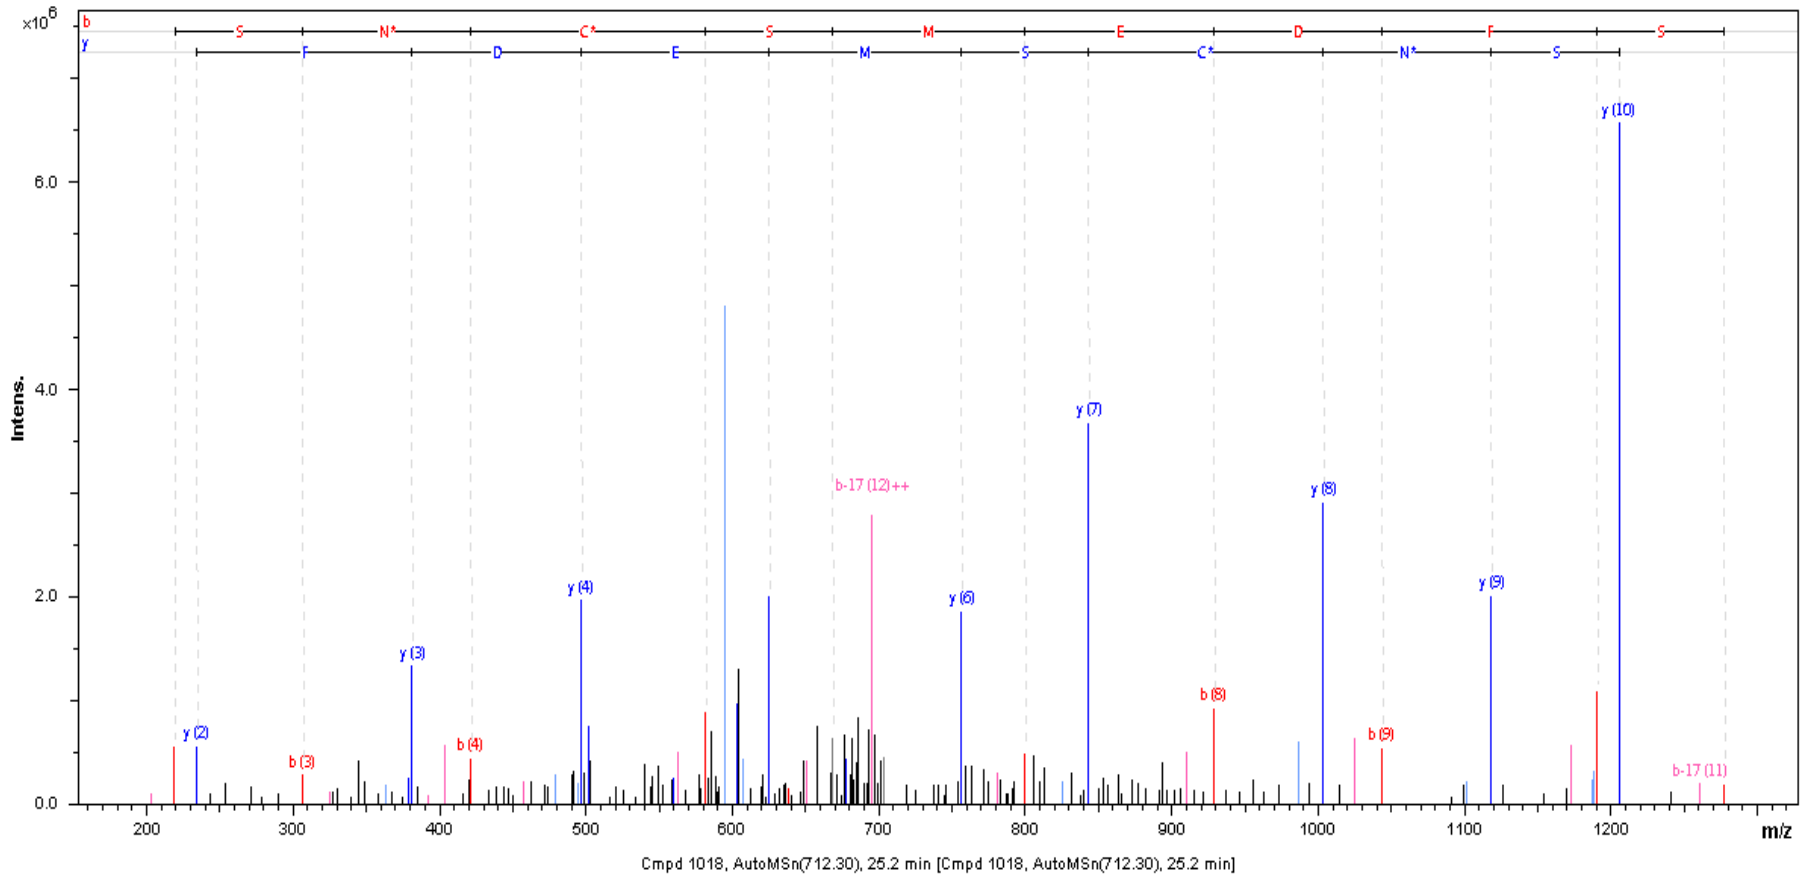

ADAM 2 precursor

R.NTTDYVGATYQGK.M

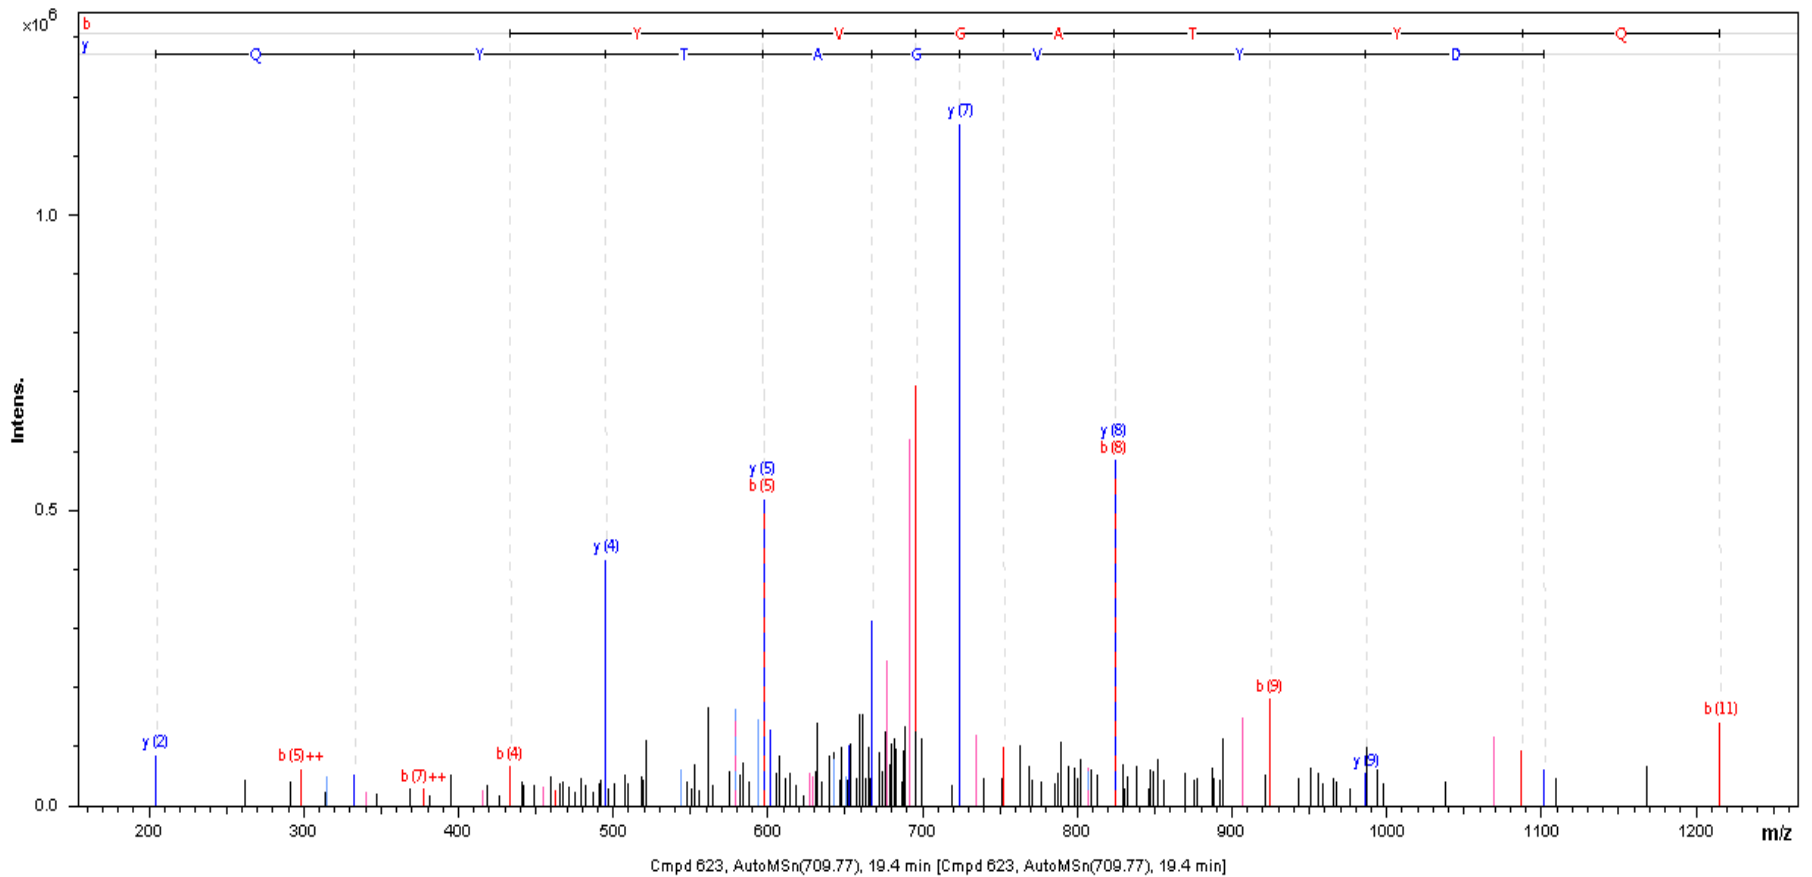

ADAM 5

K.ANLSVAYAQIR.D

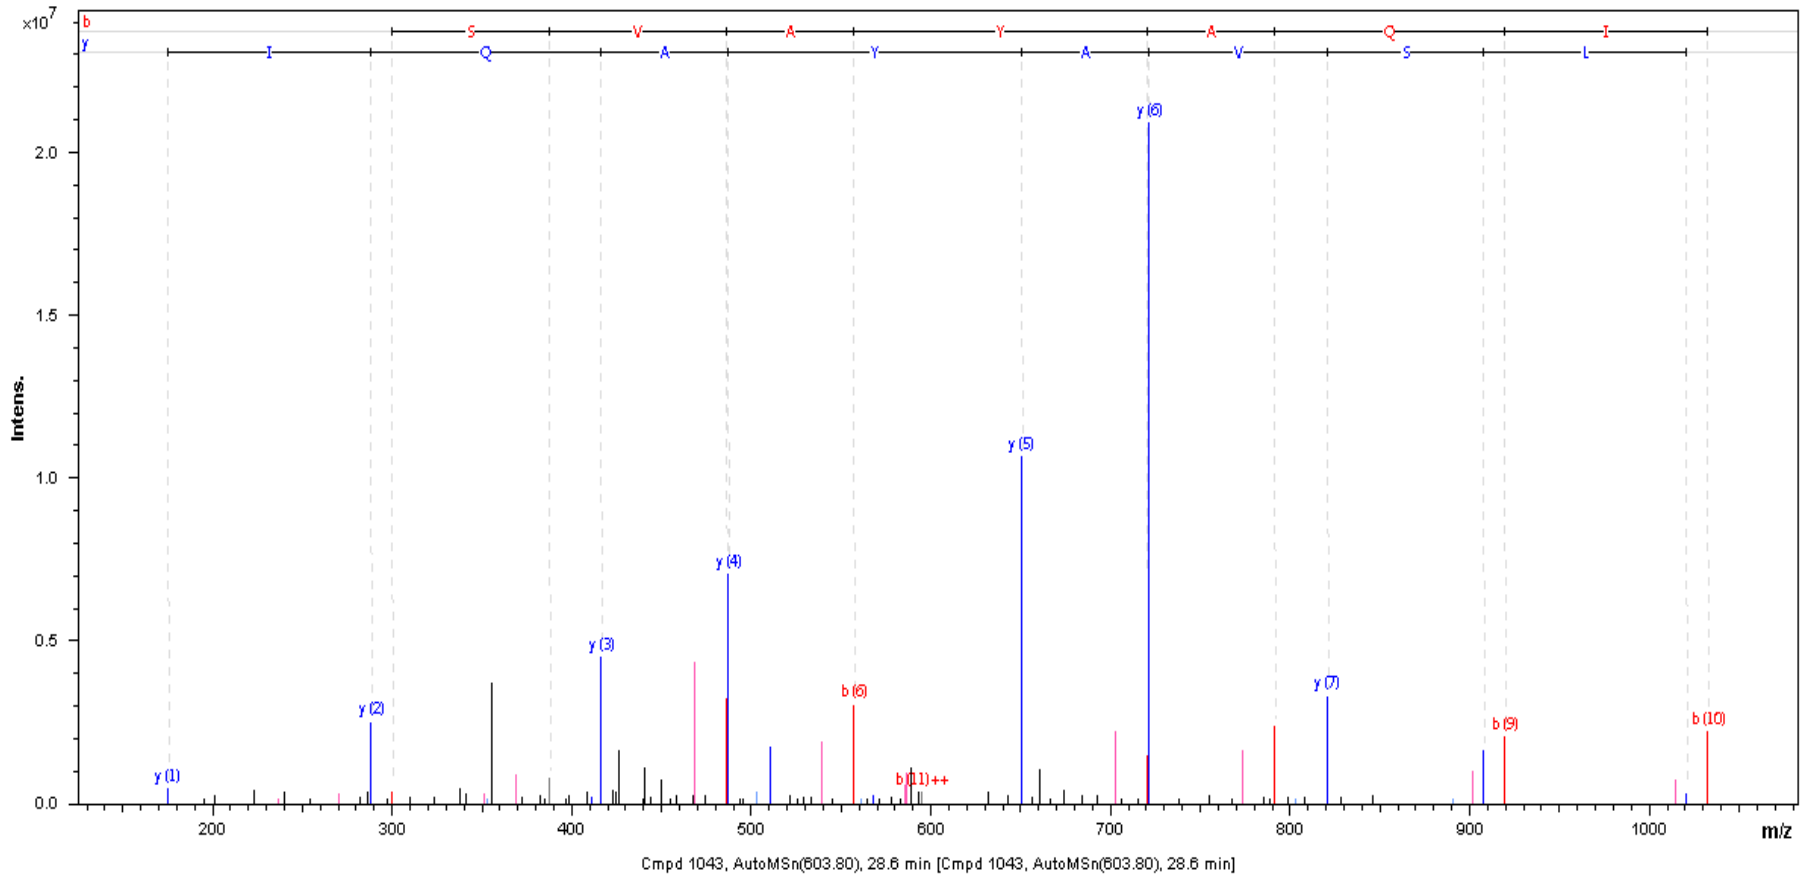

ADAM 1b

K.EGDVCRPADGPCDLEEYCNGTSAACPSDR.K

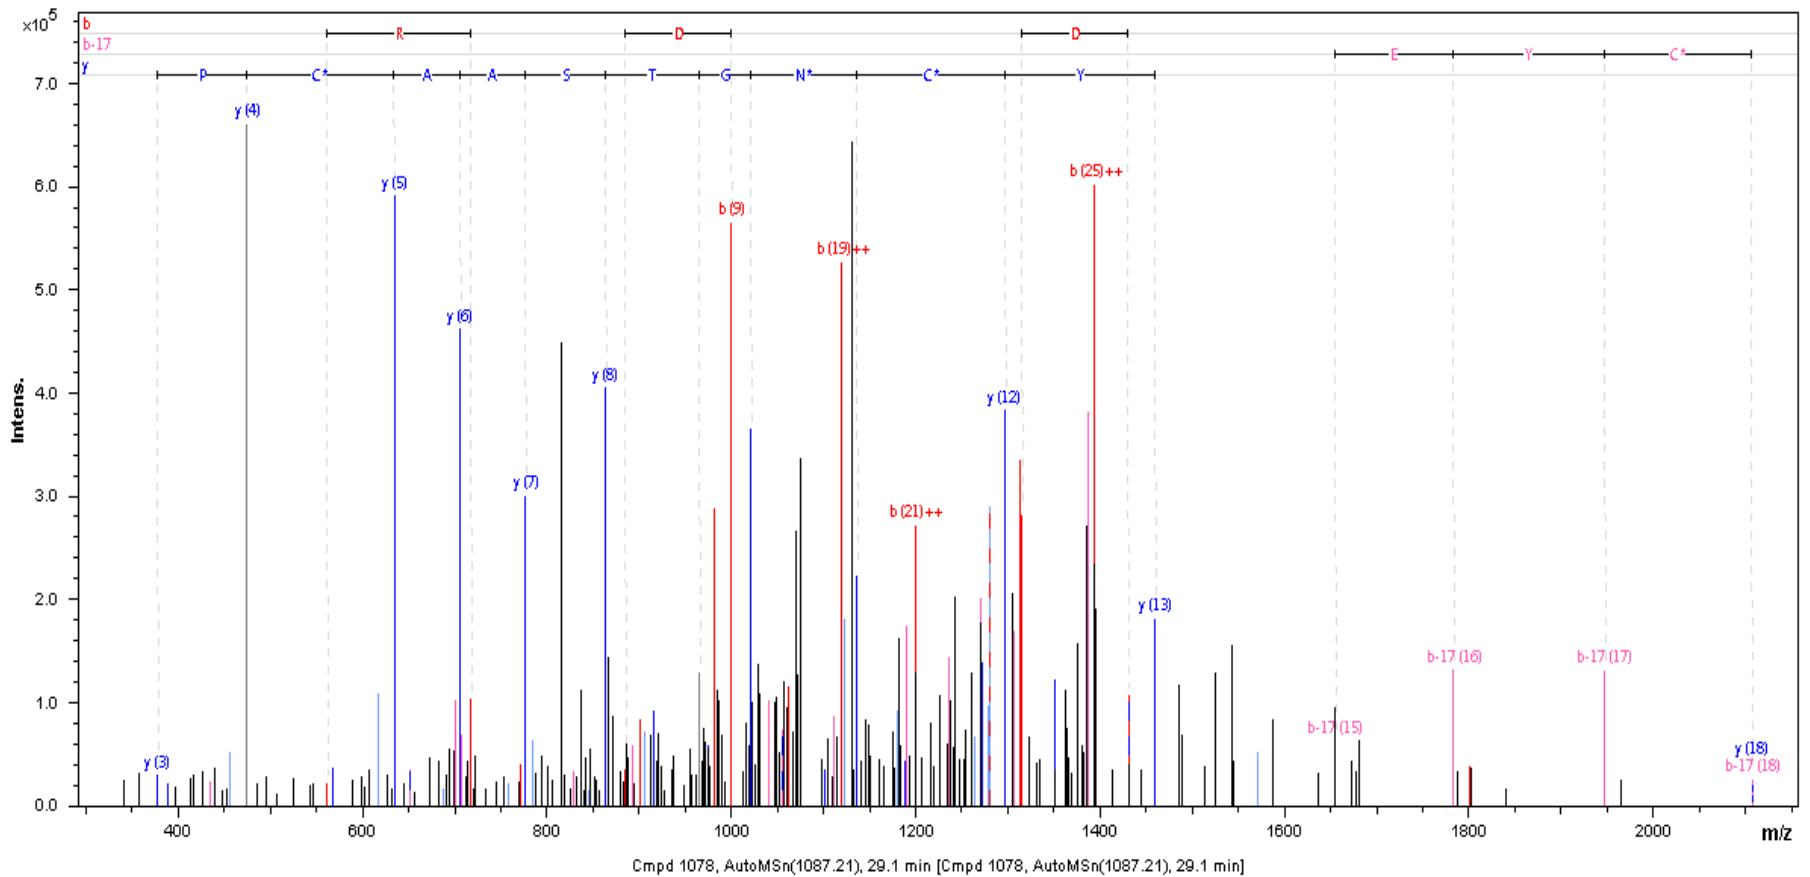

Anthrax toxin receptor-like

K.DFYQVNISGHGLNNTSNMK.Q \*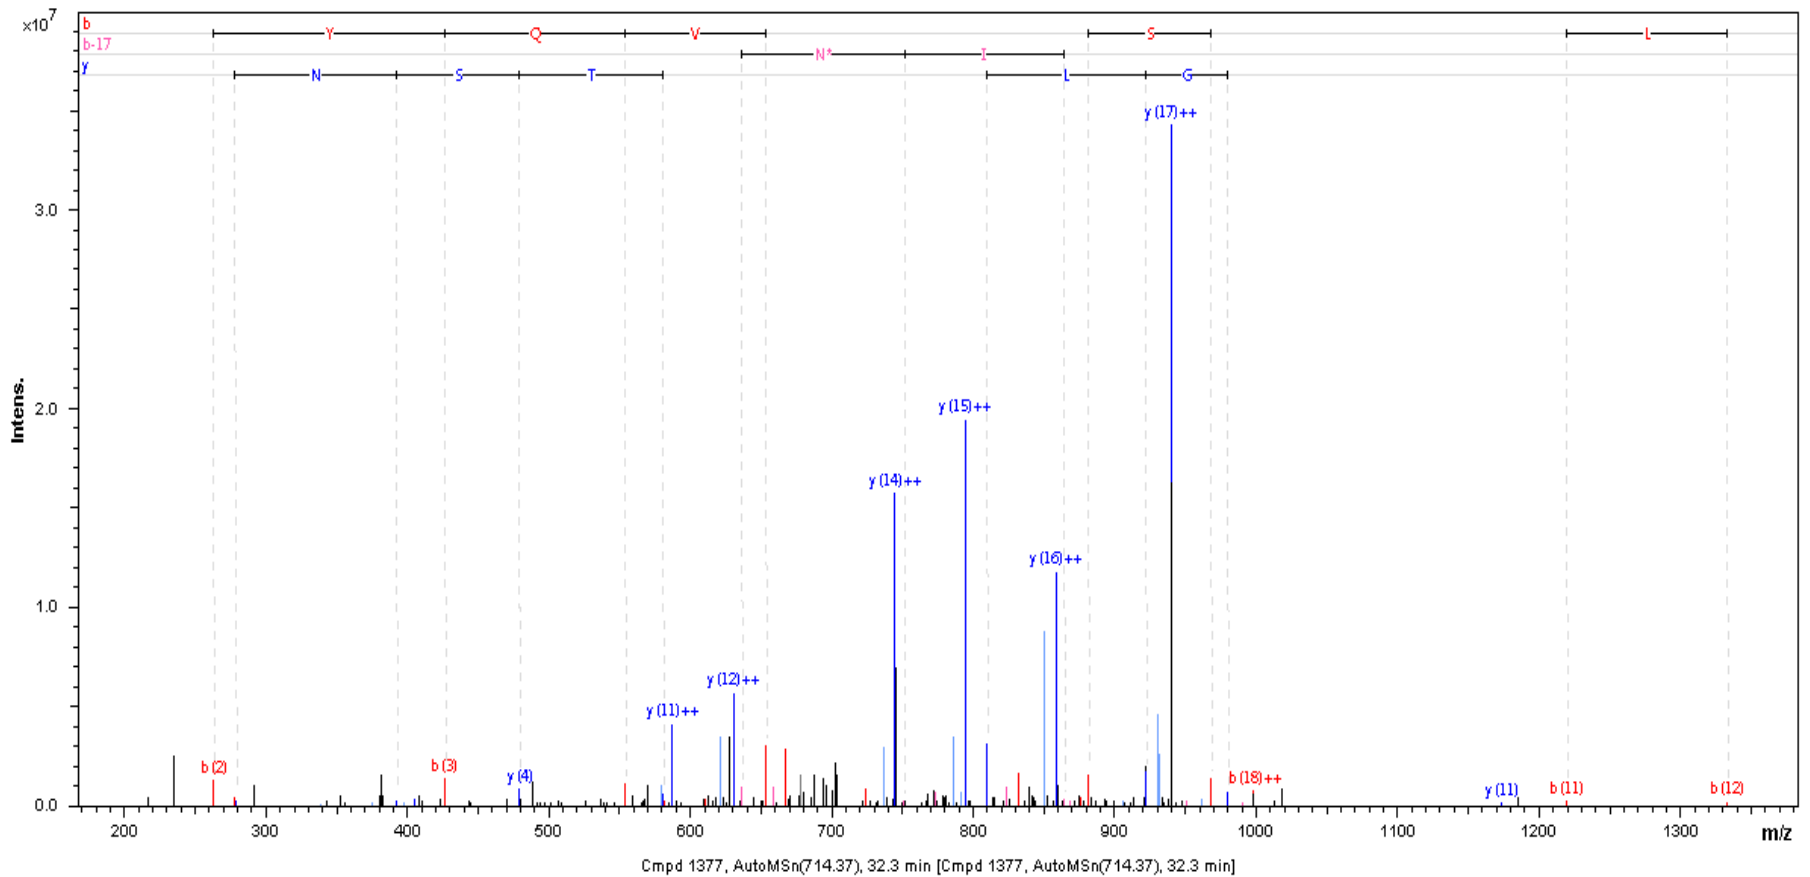

Beta-2-glycoprotein 1 precursor

K.DYRPSAGNNSLYQDTVVFK.C

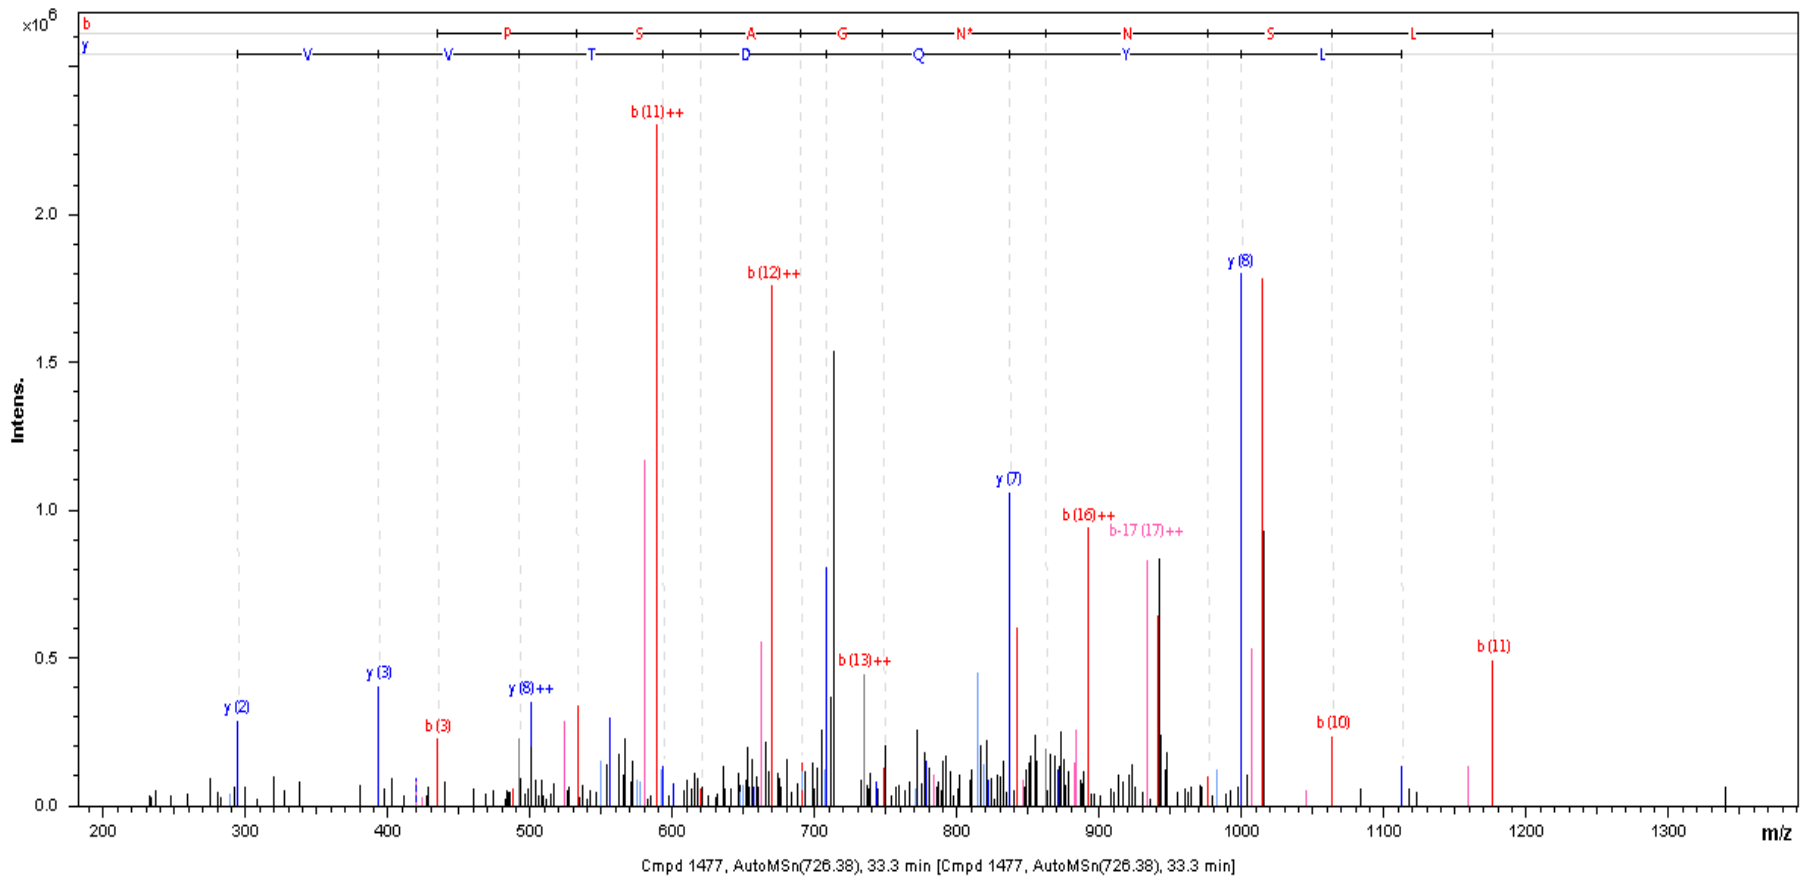

Beta-2-glycoprotein 1 precursor

K.NISFACNPGFFLNGTSSSK.\*

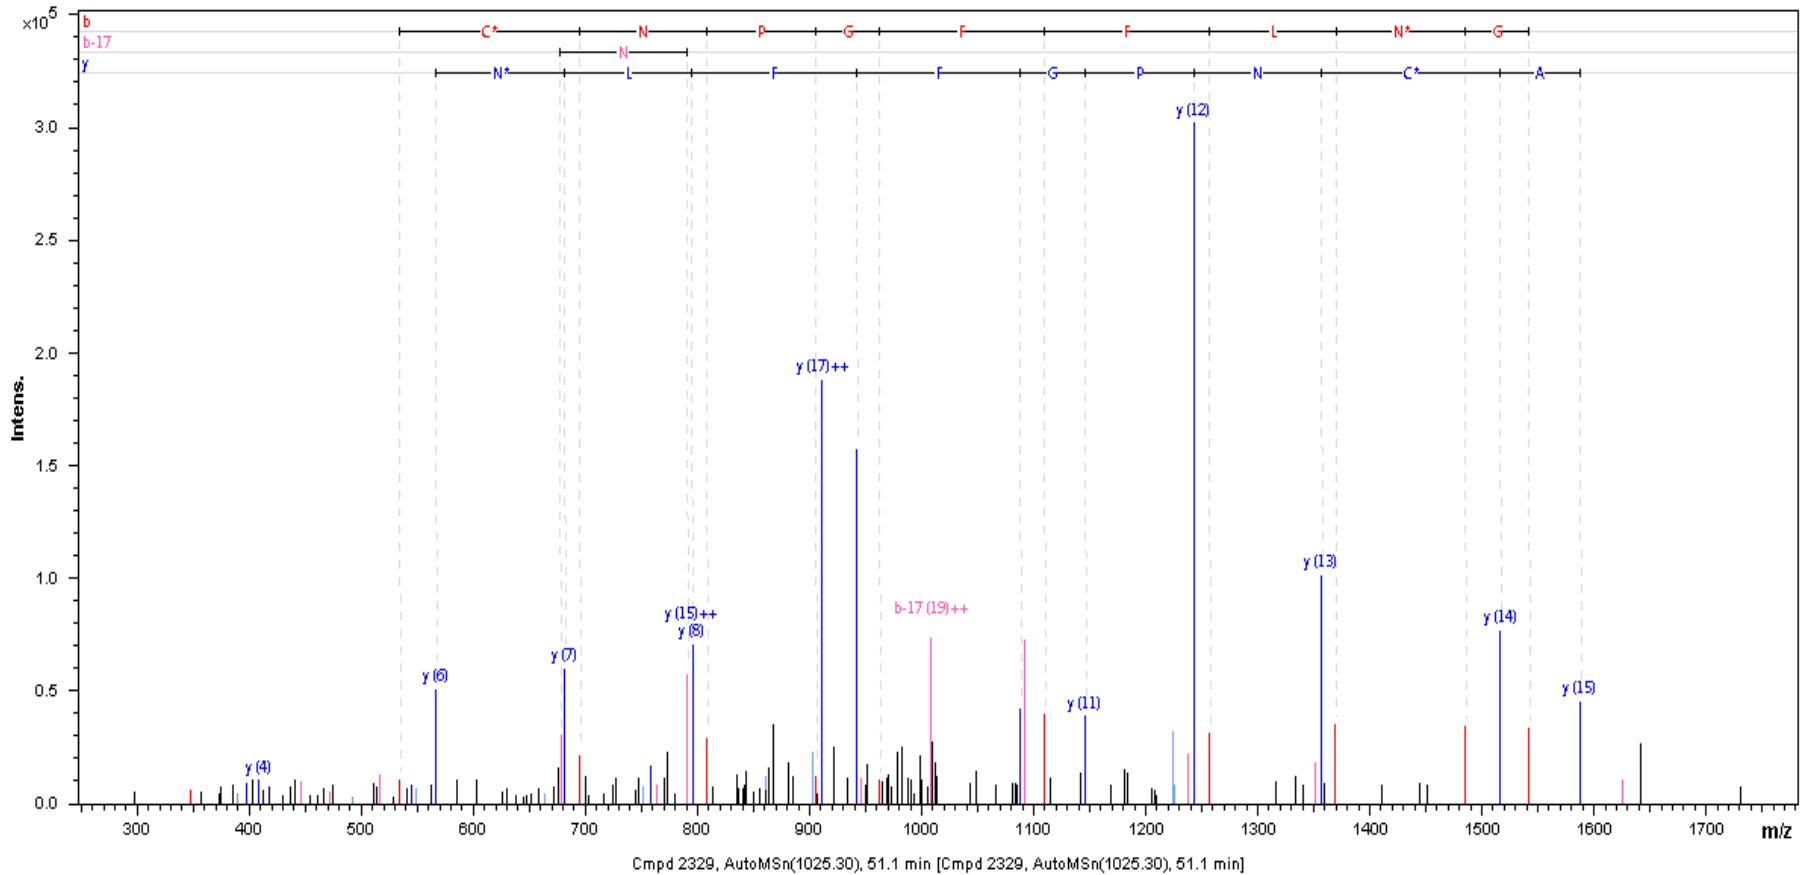

Sodium/potassium-transporting ATPase subunit beta-3

K.EENATIATYPEFGVLDLKY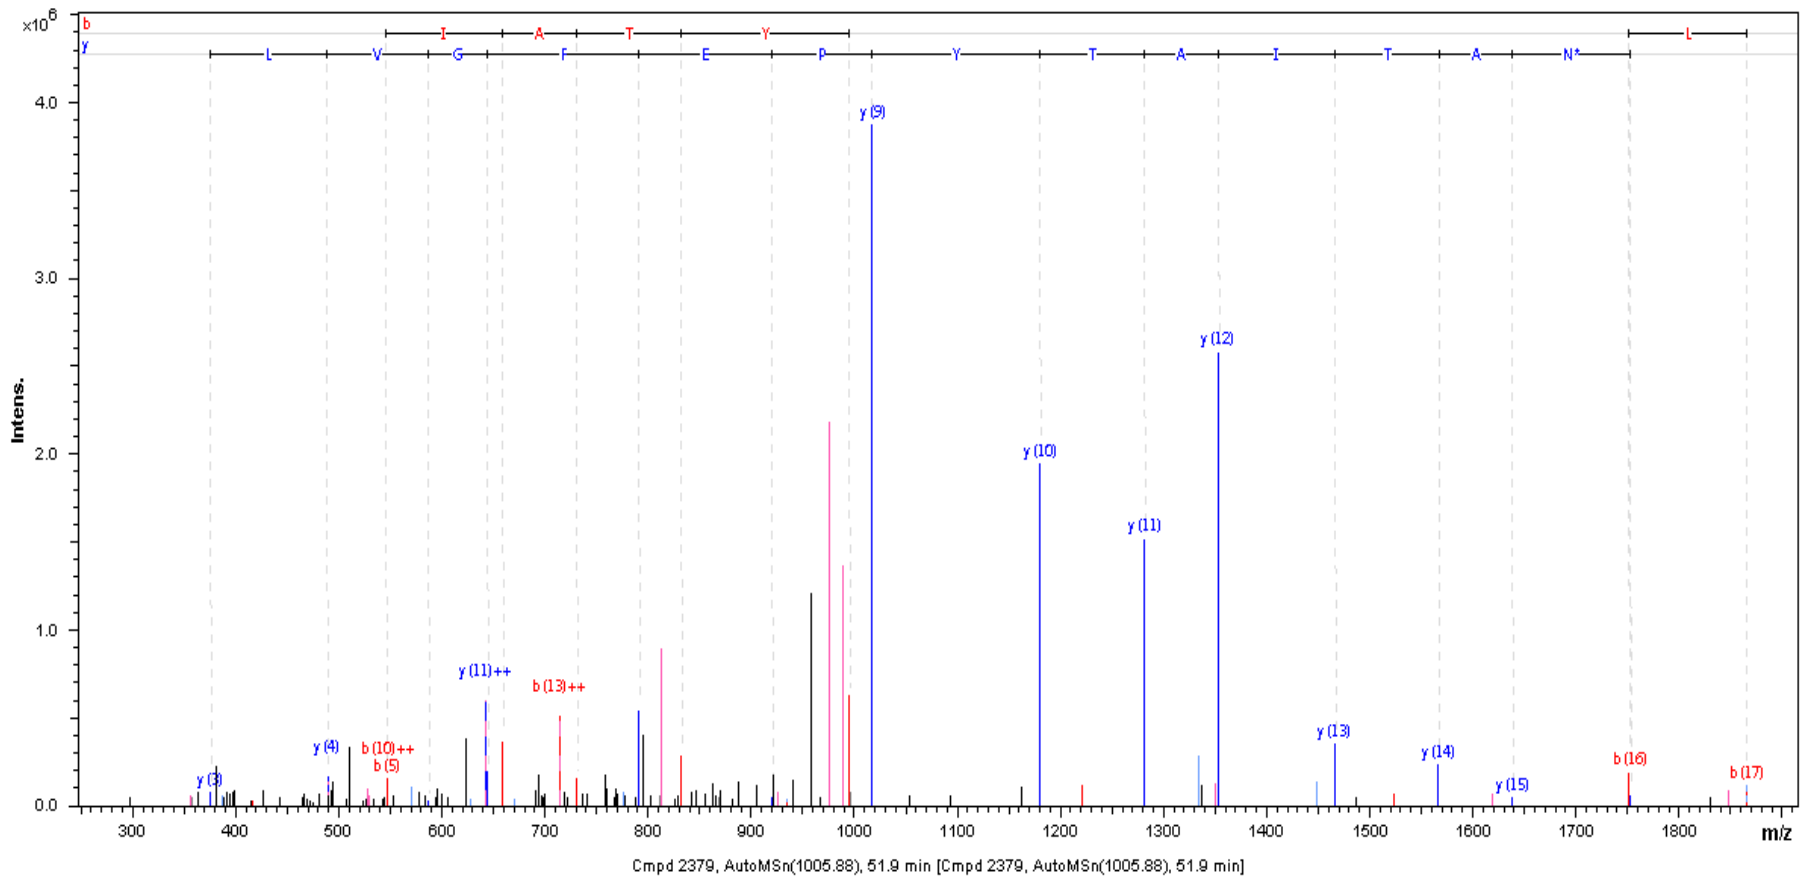



Basigin precursor

K.SQLTISNLDVNVDPGTYVCNATNAQGTR.E \*

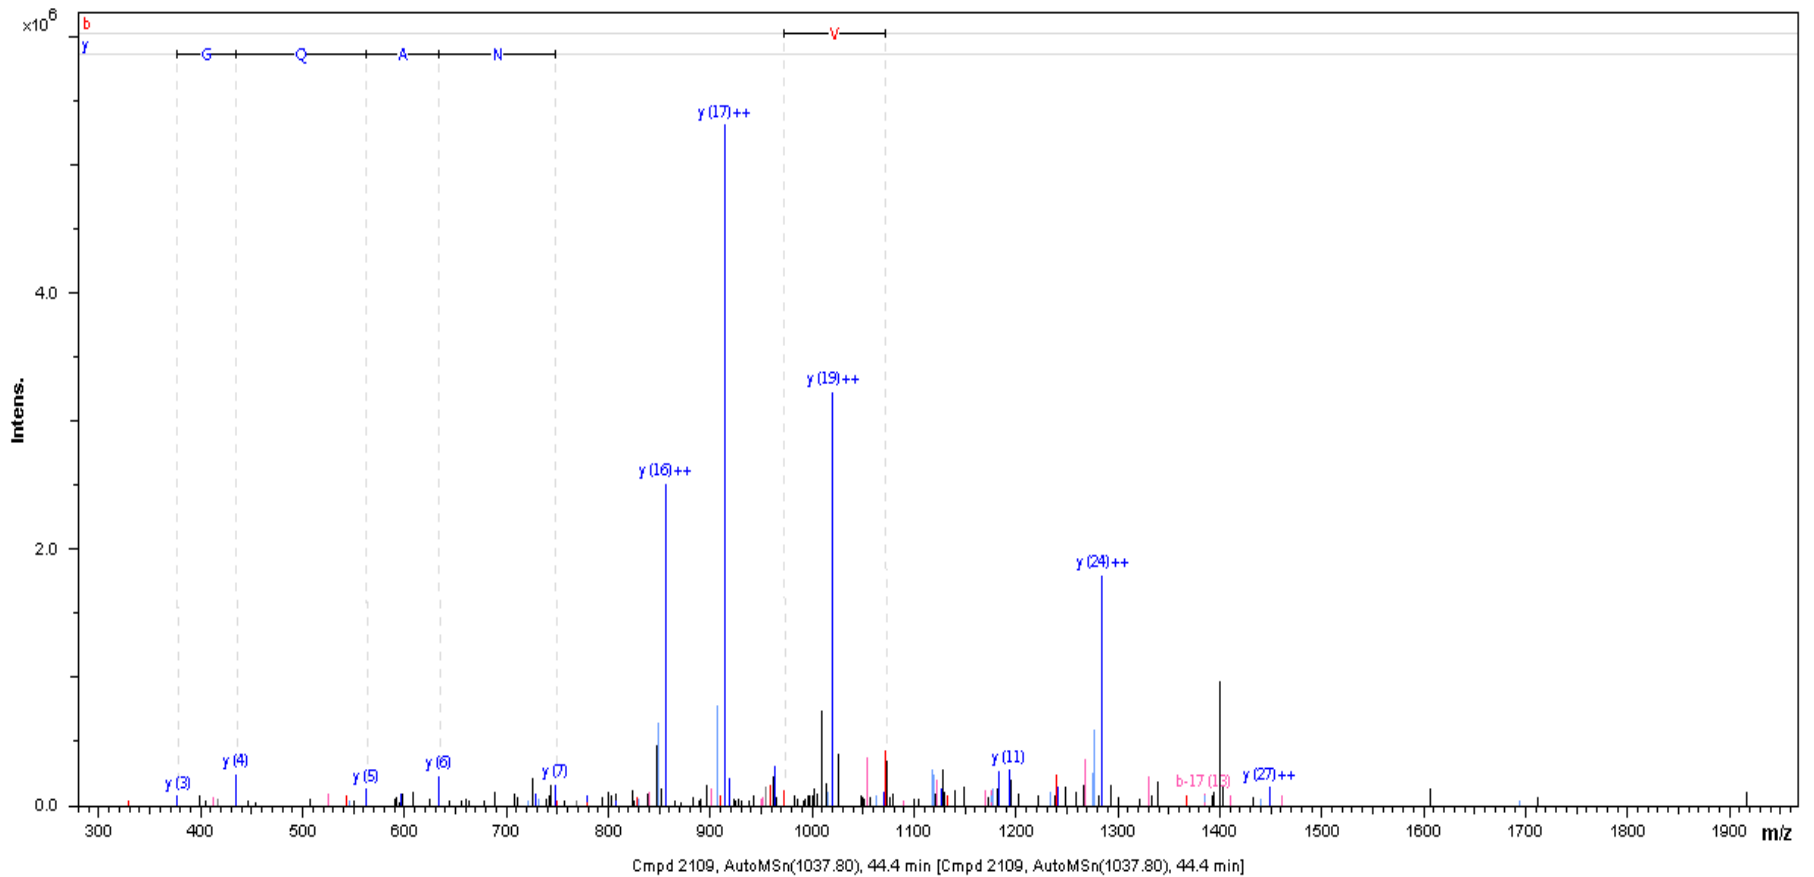

Basigin precursor

K.TSDTGEEEAITNSTEANGK.Y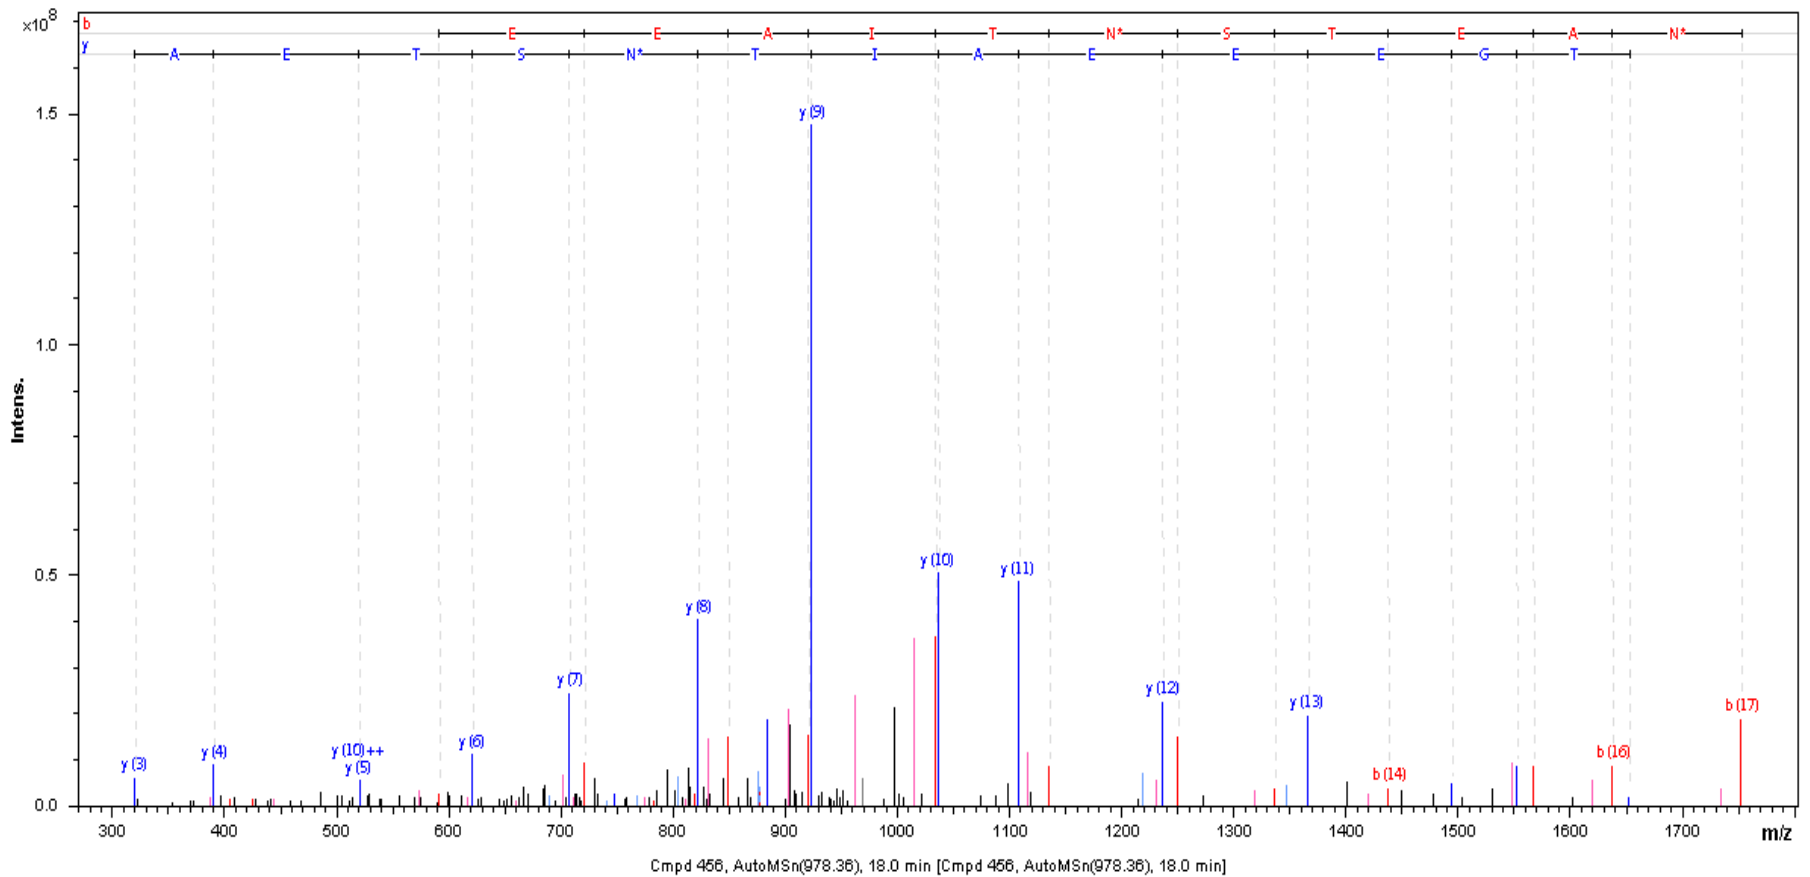

Bactericidal permeability-increasing protein

K.TNASLEVDAEENR.L

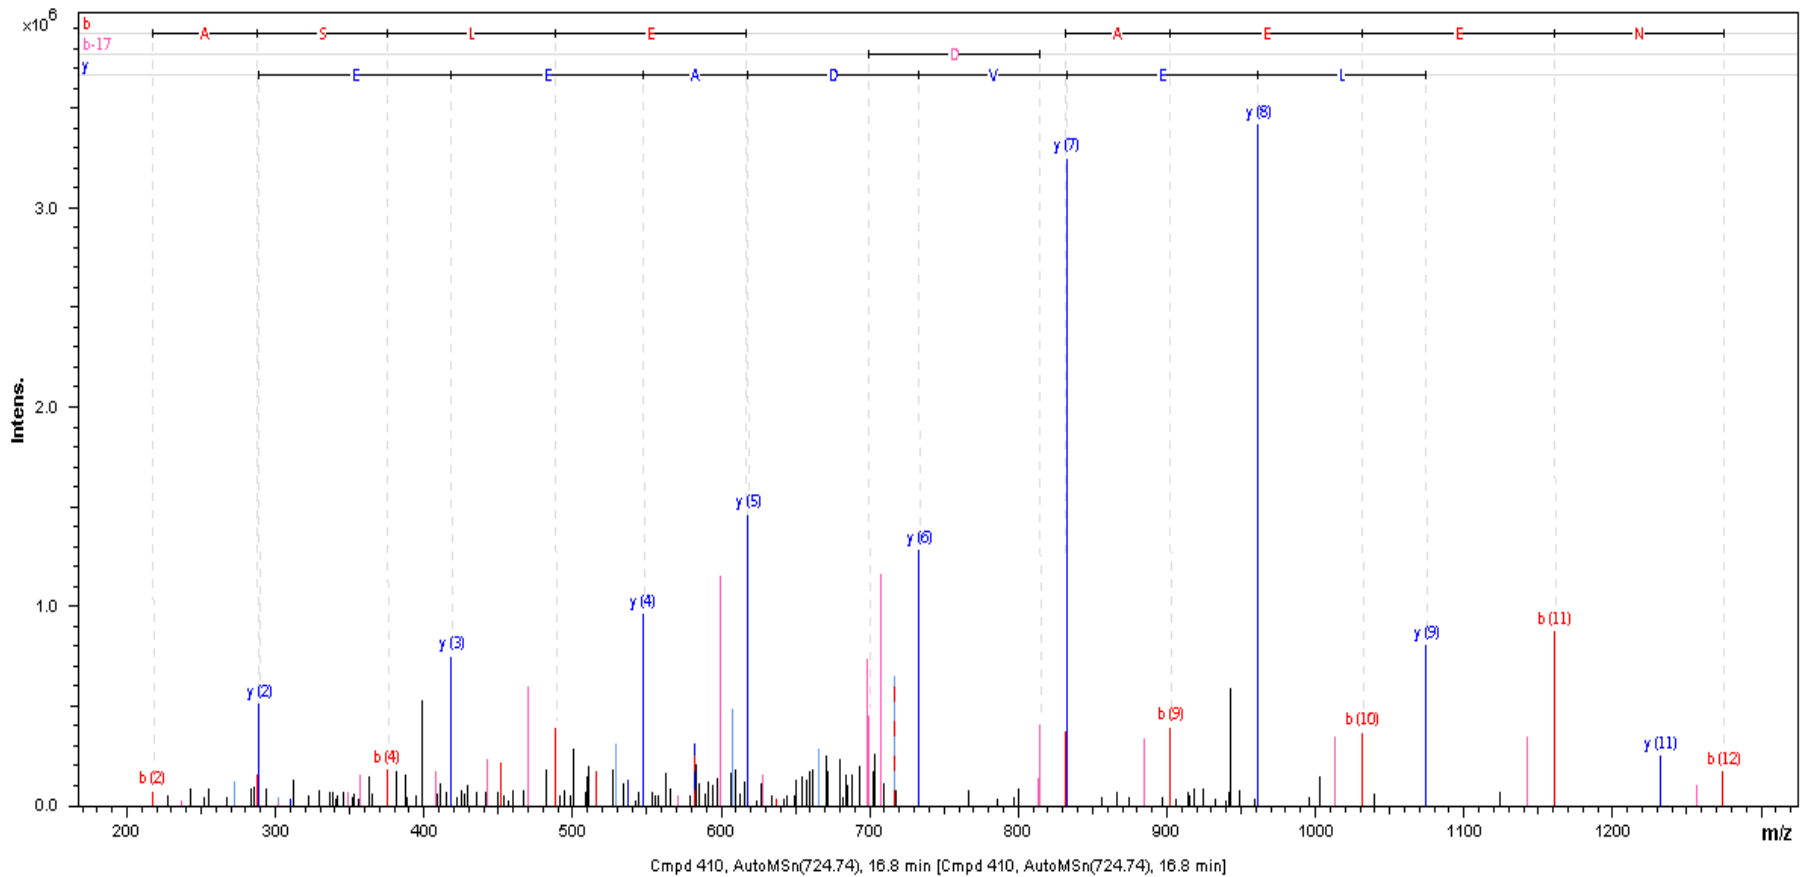

C4b-binding protein

K.ALCQKPEVGNGLSDEK.D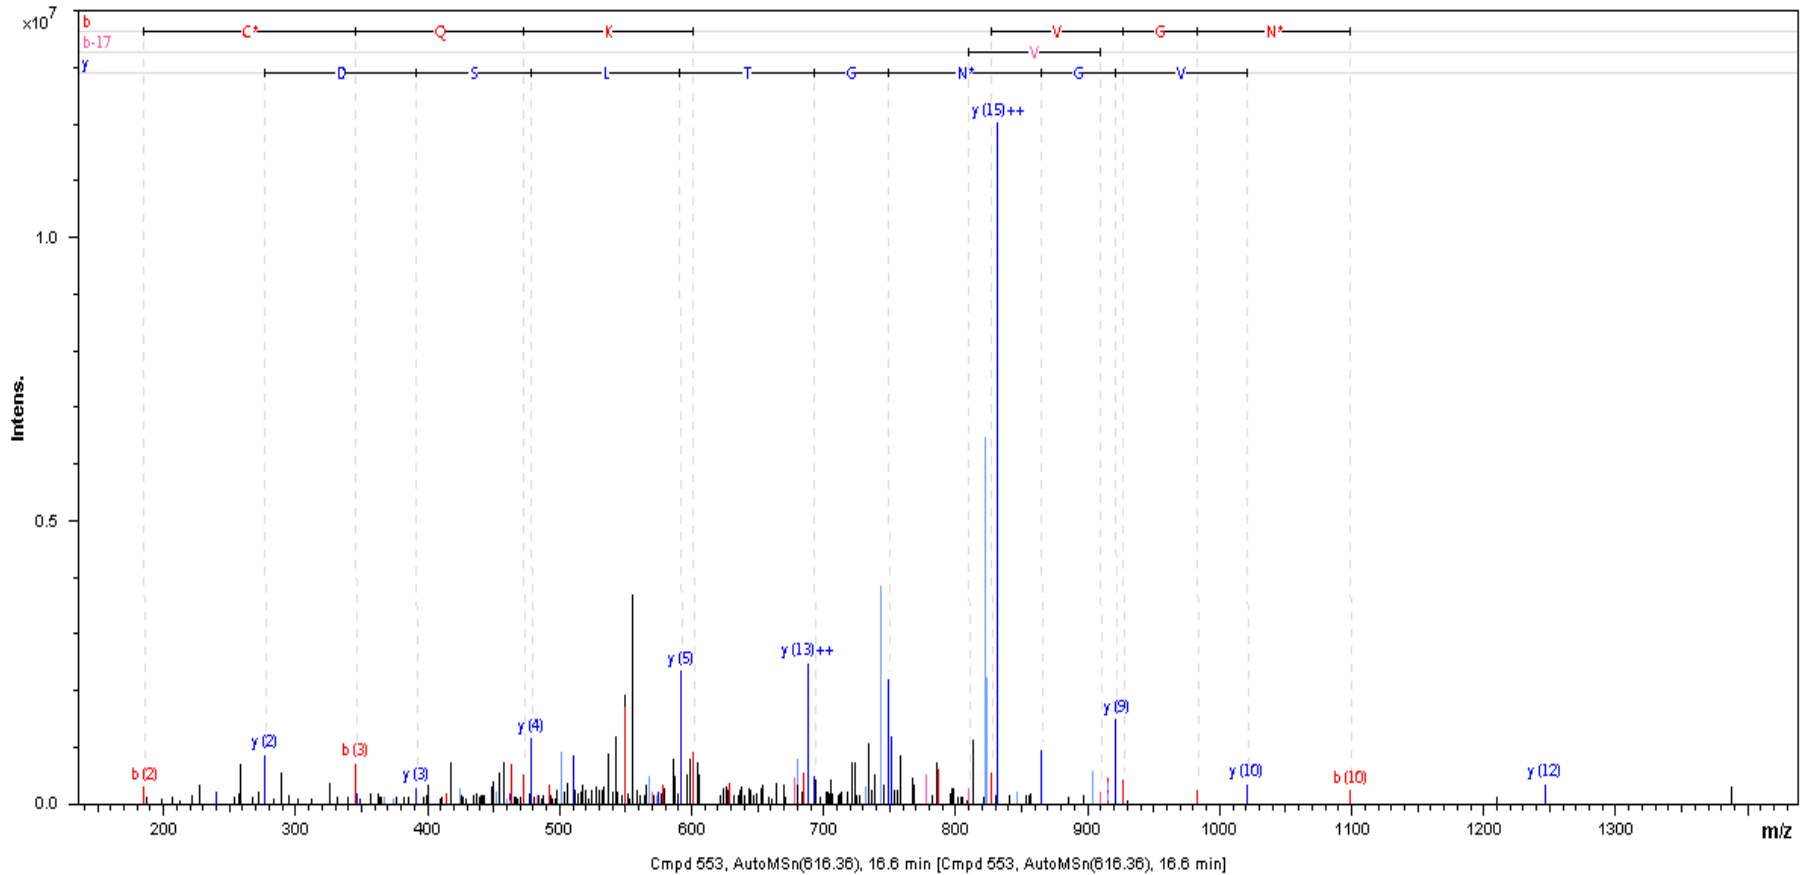

C4b-binding protein

R.CEQEASEDLKPALTGNK.T

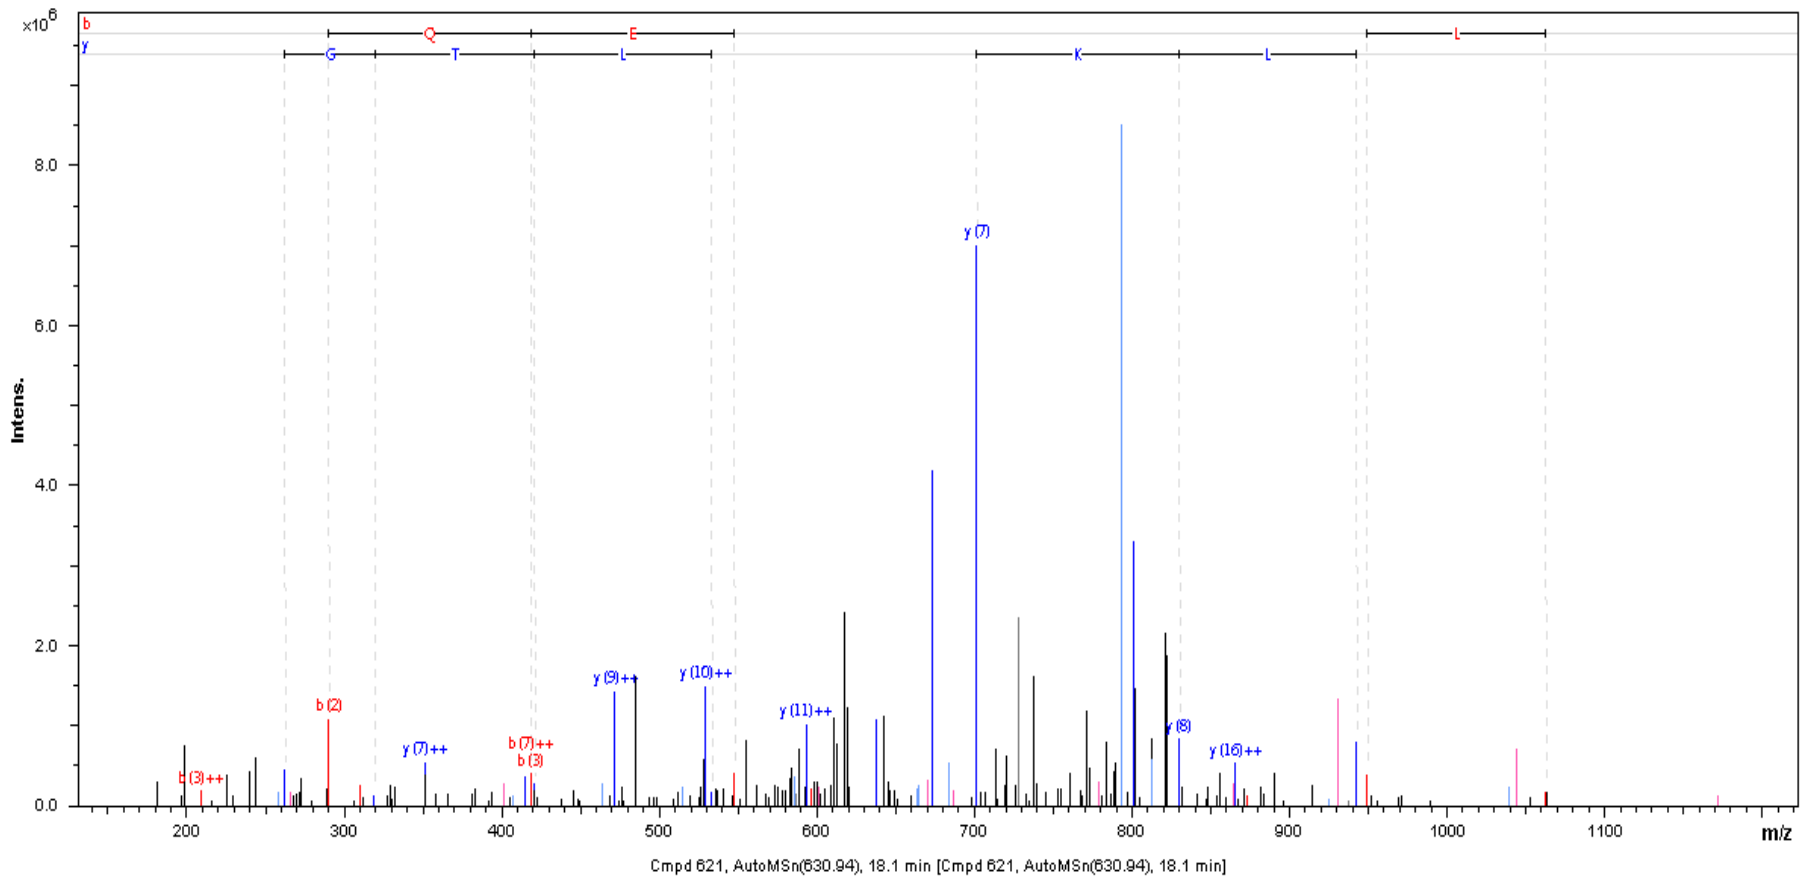

C4b-binding protein

R.LACLNGTVLR.G

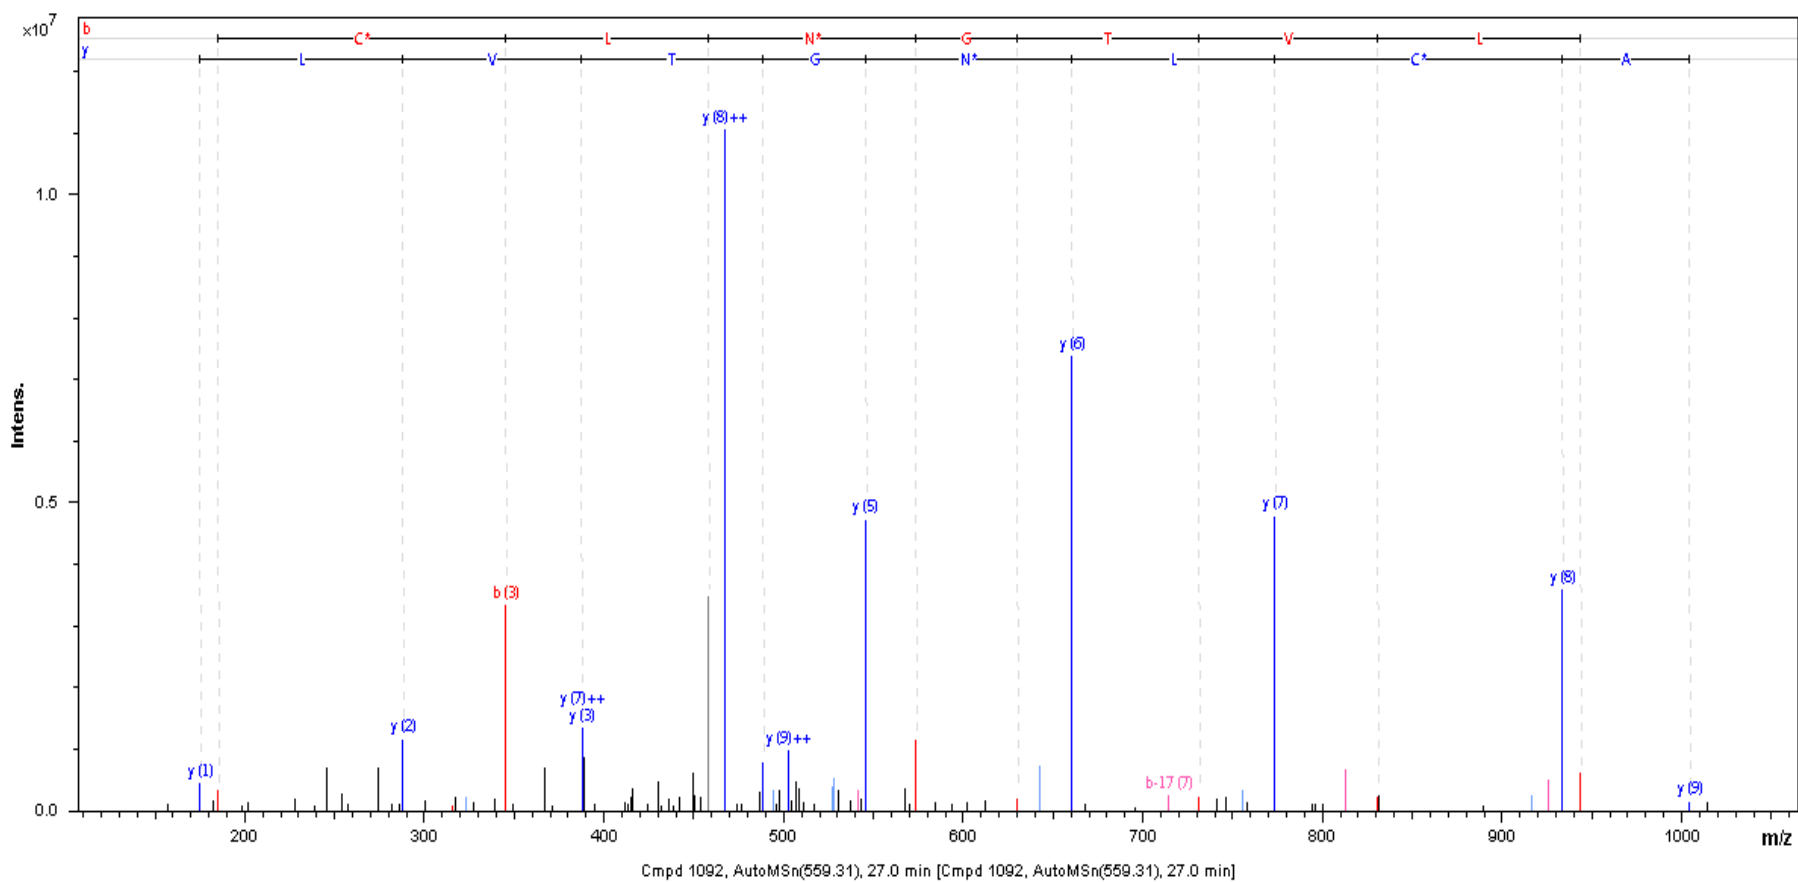

Carbonic anhydrase 4 precursor

R.YNGSLTPNCDETVIWTVYK.Q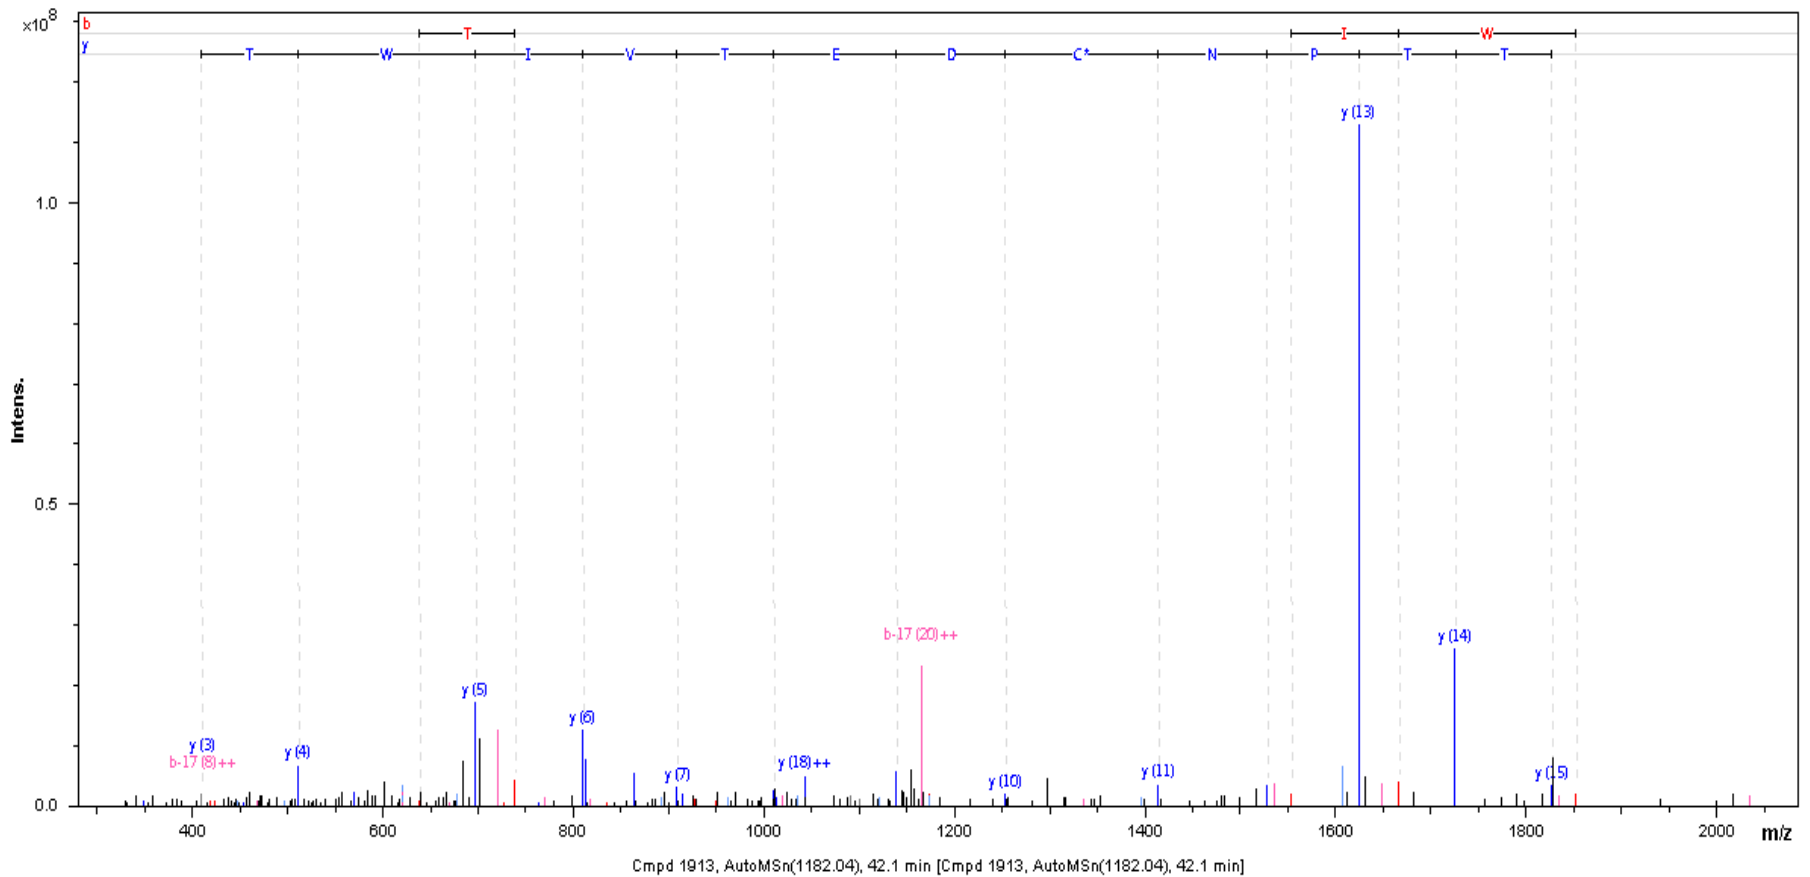

Carboxypeptidase A5 precursor

K.AGFGGNGSNKNPCSETYR.G \*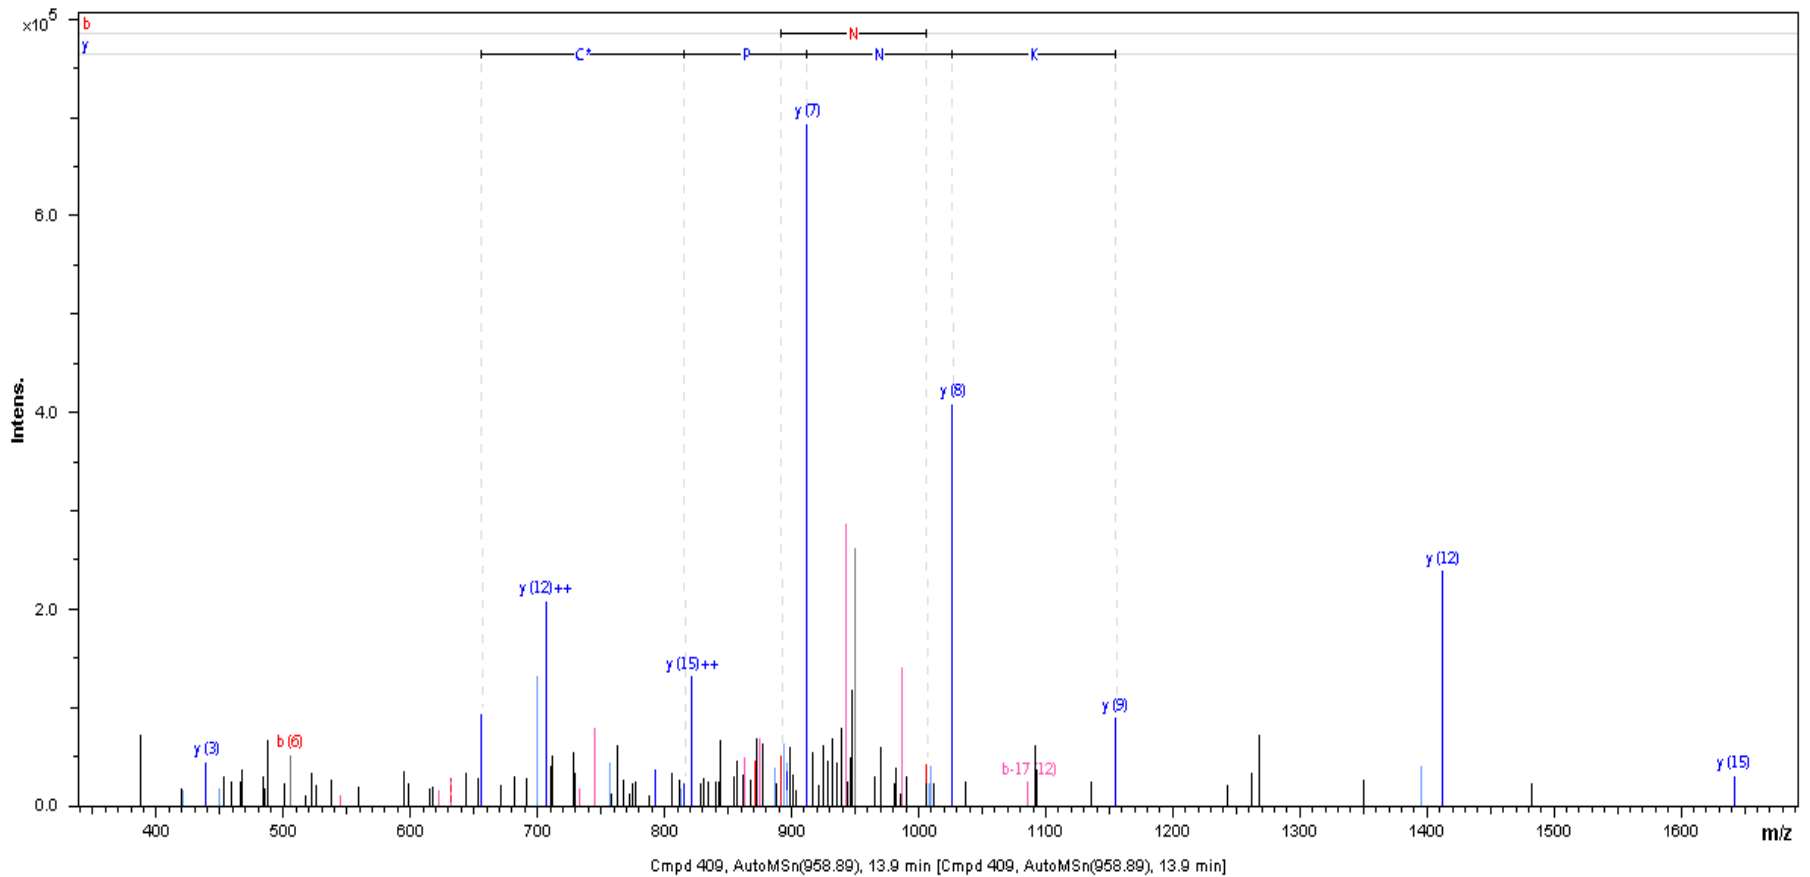



Carboxypeptidase Q

K.EVMNLLQPLNVTK.V

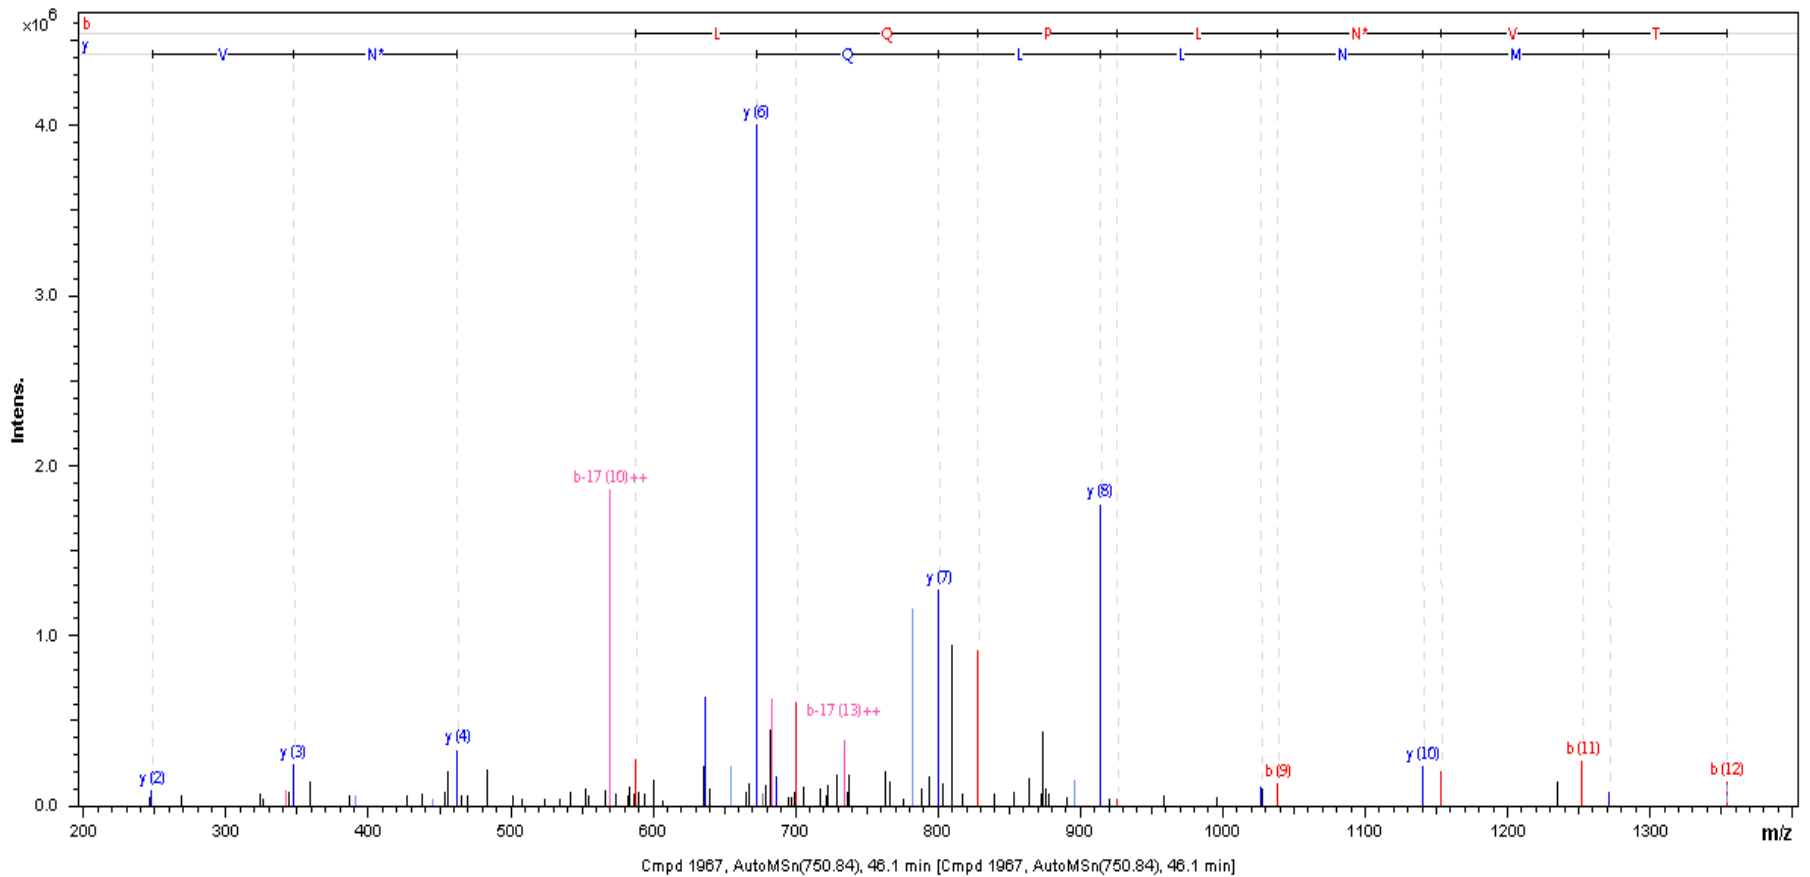

CD109 antigen homolog precursor

R.FLV**T**APGIIRPGAN**V**TI**G**VDLLENSPPQVLVK.A \*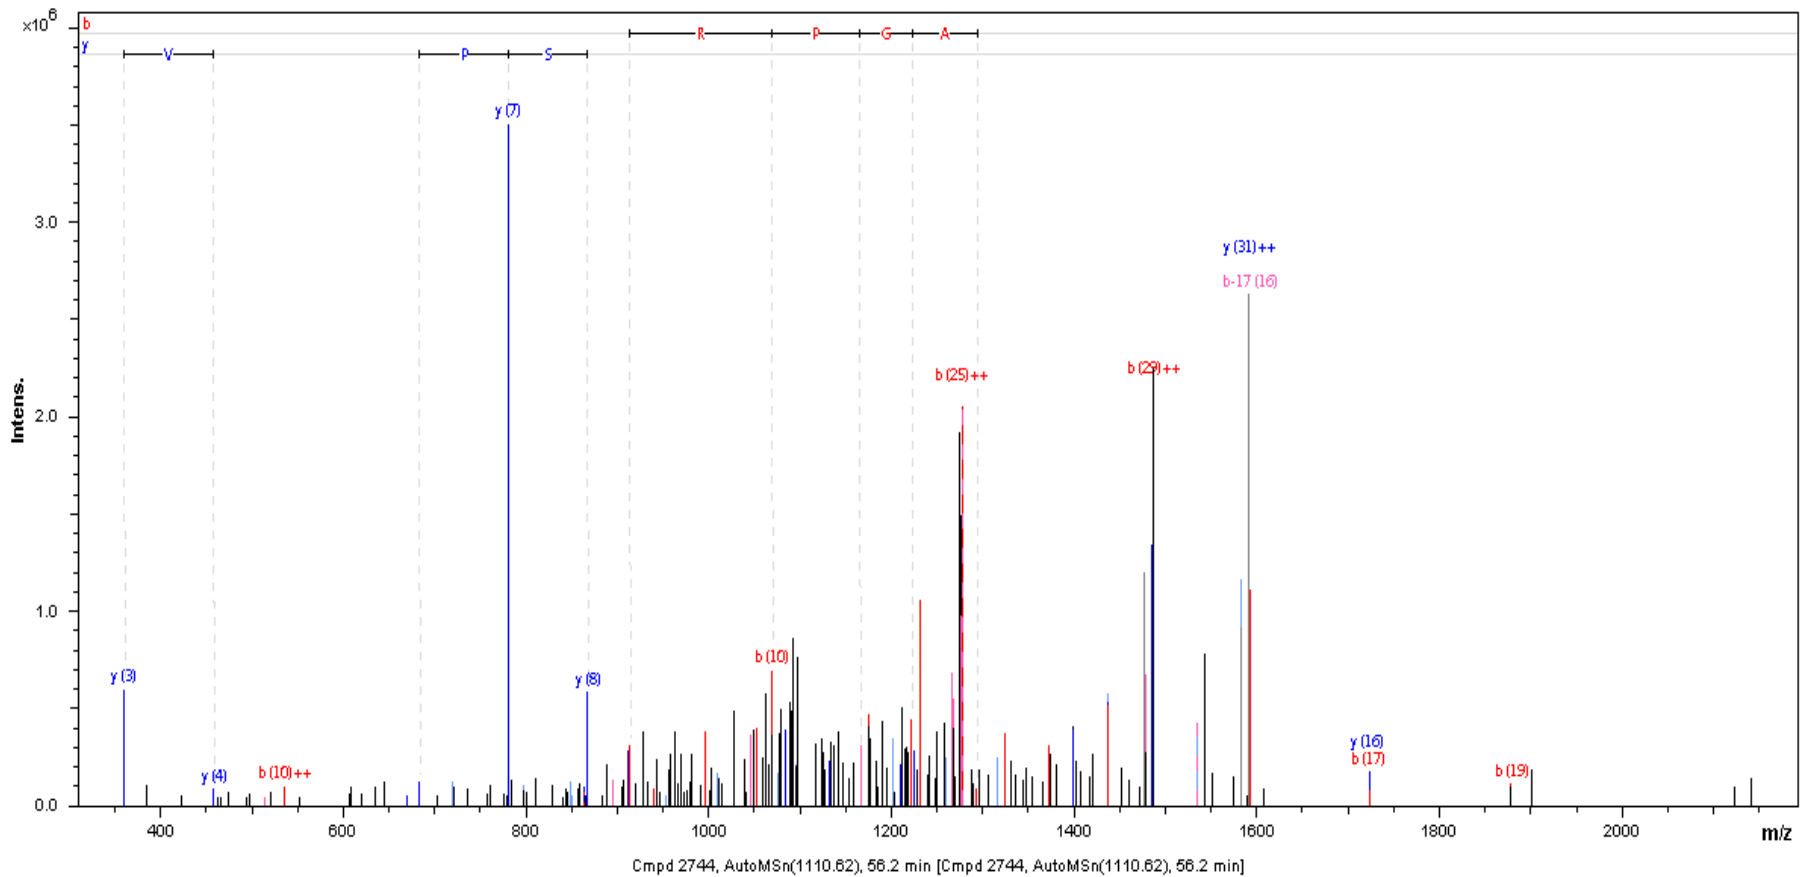

CD151 antigen

K.LQQEFHCCGSNNSQDWQDSEWIR.S

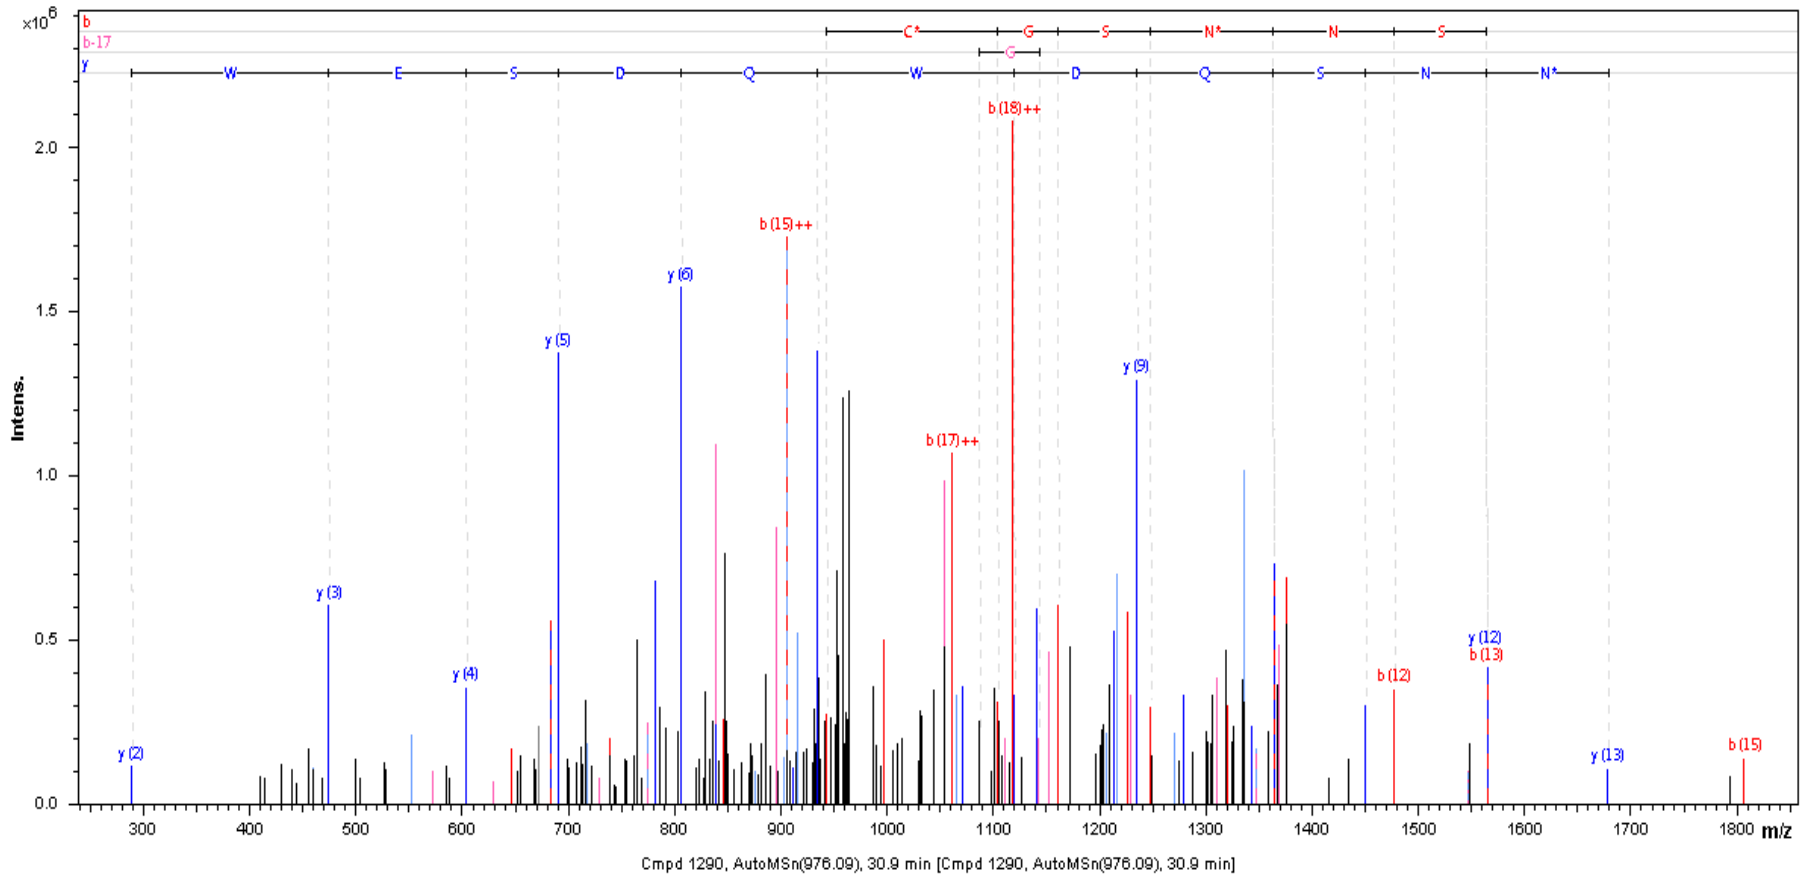

CD59B glycoprotein

K.INTTCSPNLDSCLYAVAGR.Q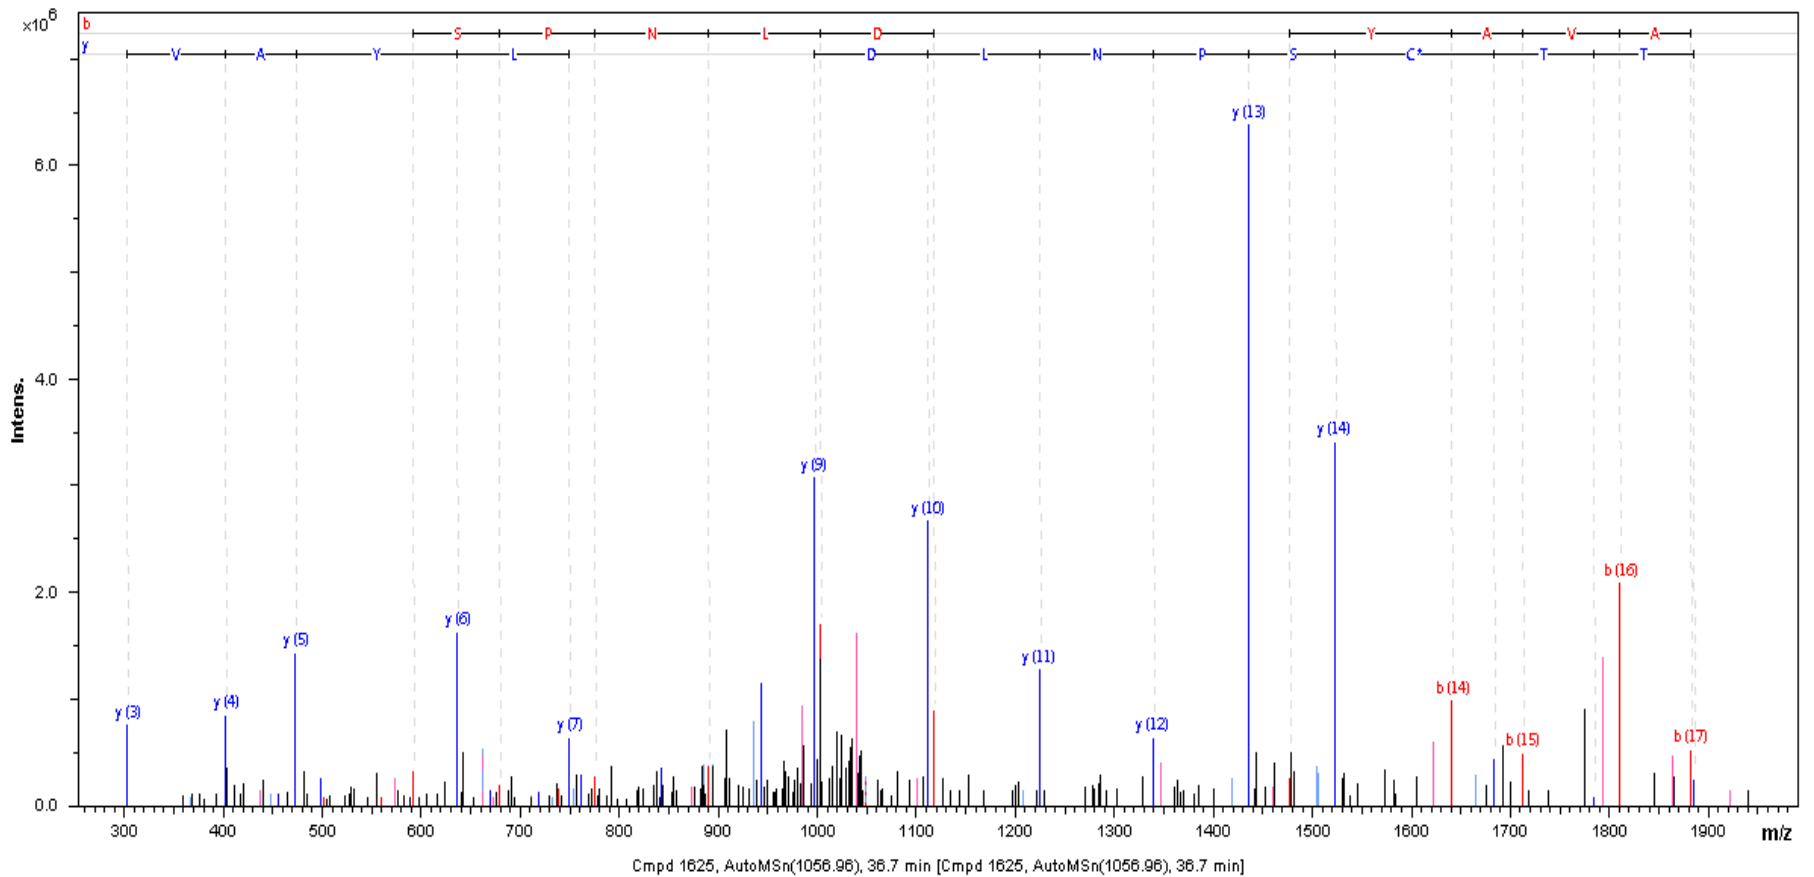

Clusterin precursor

K.AFPEVCNETMMALWEECKPCLK.H \*

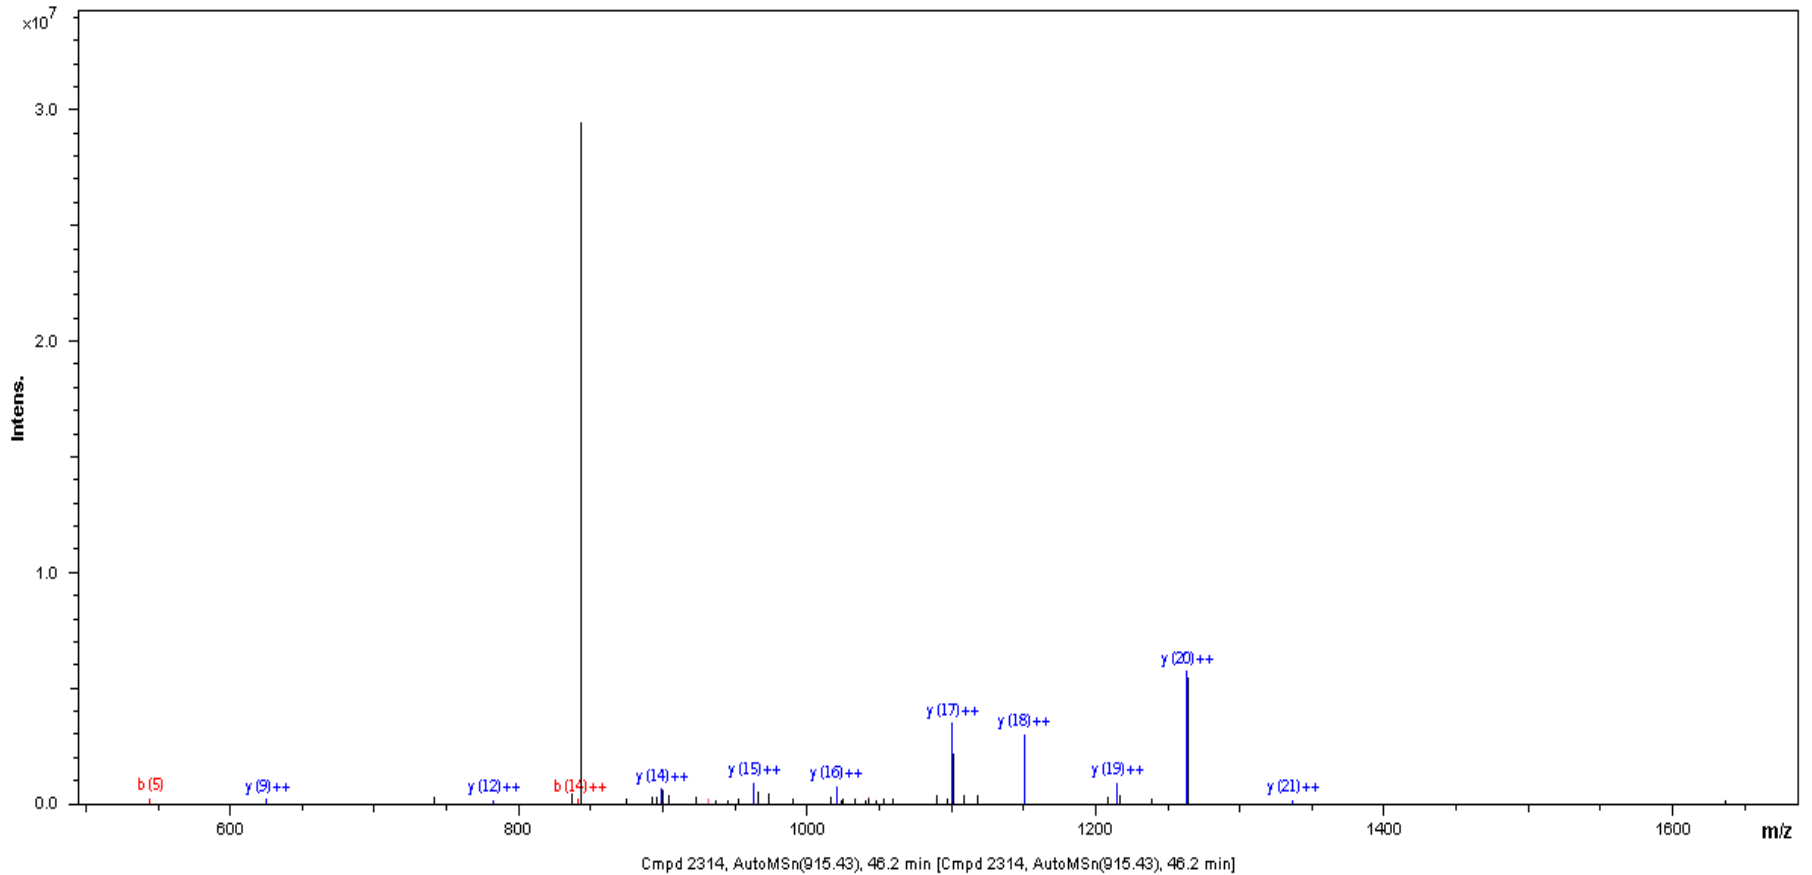

Clusterin precursor

R.QELNDSLQVAER.L

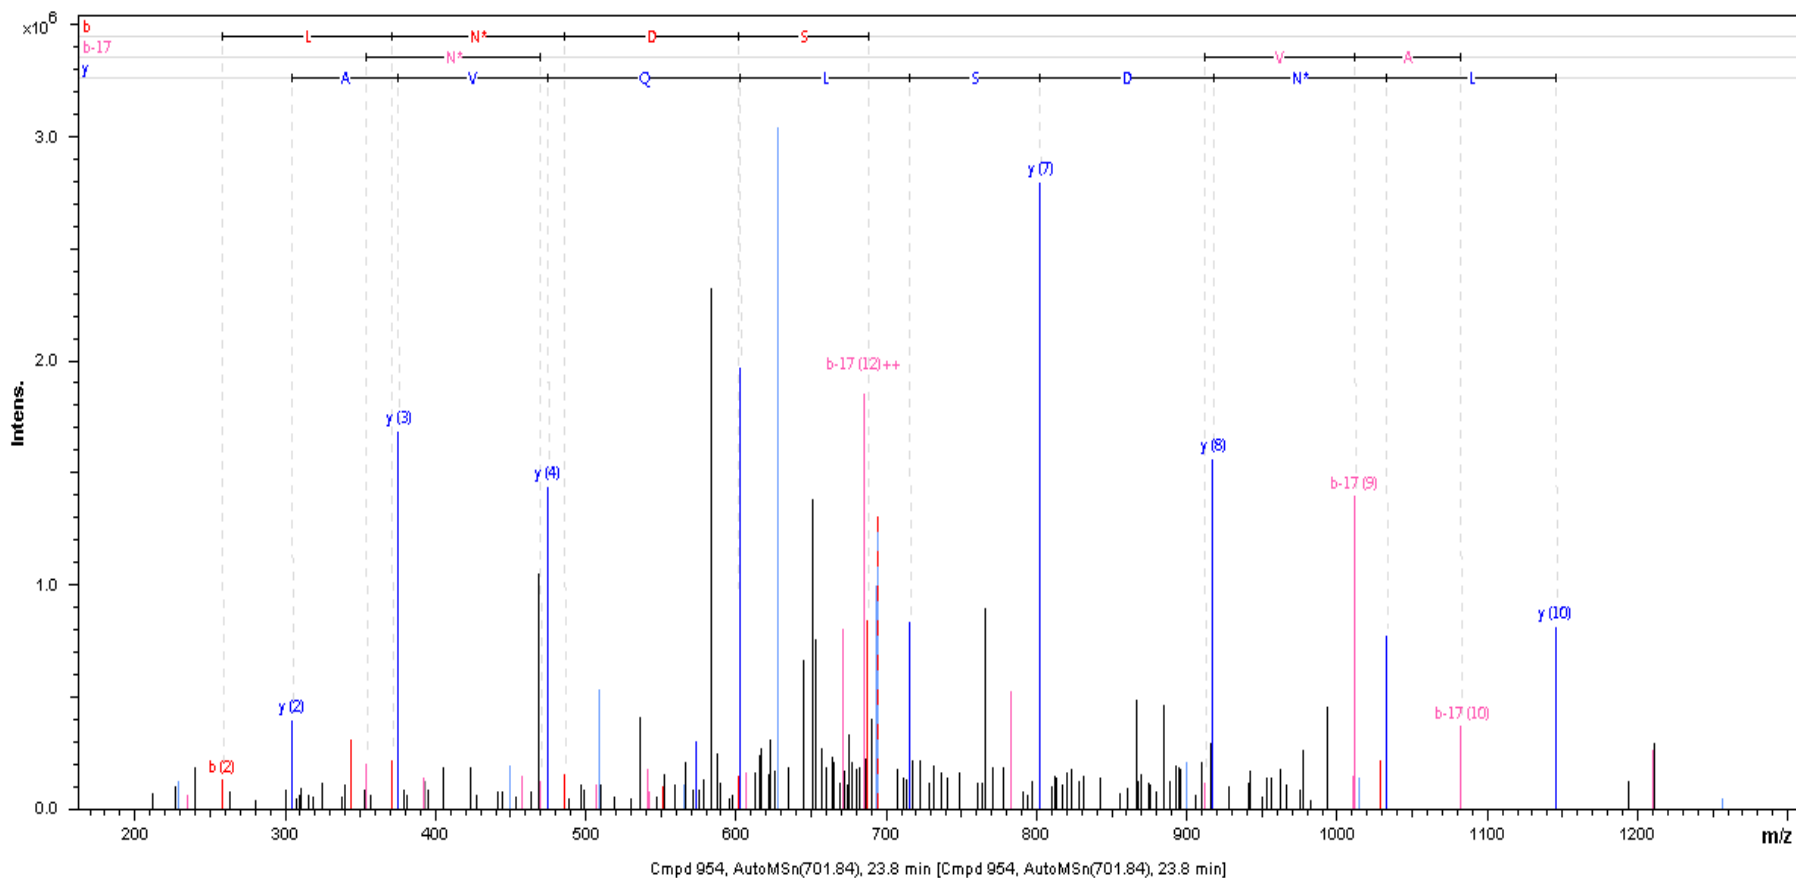

Choline transporter-like protein 5

R.CIPDLSALNGTWTTPGSR.M

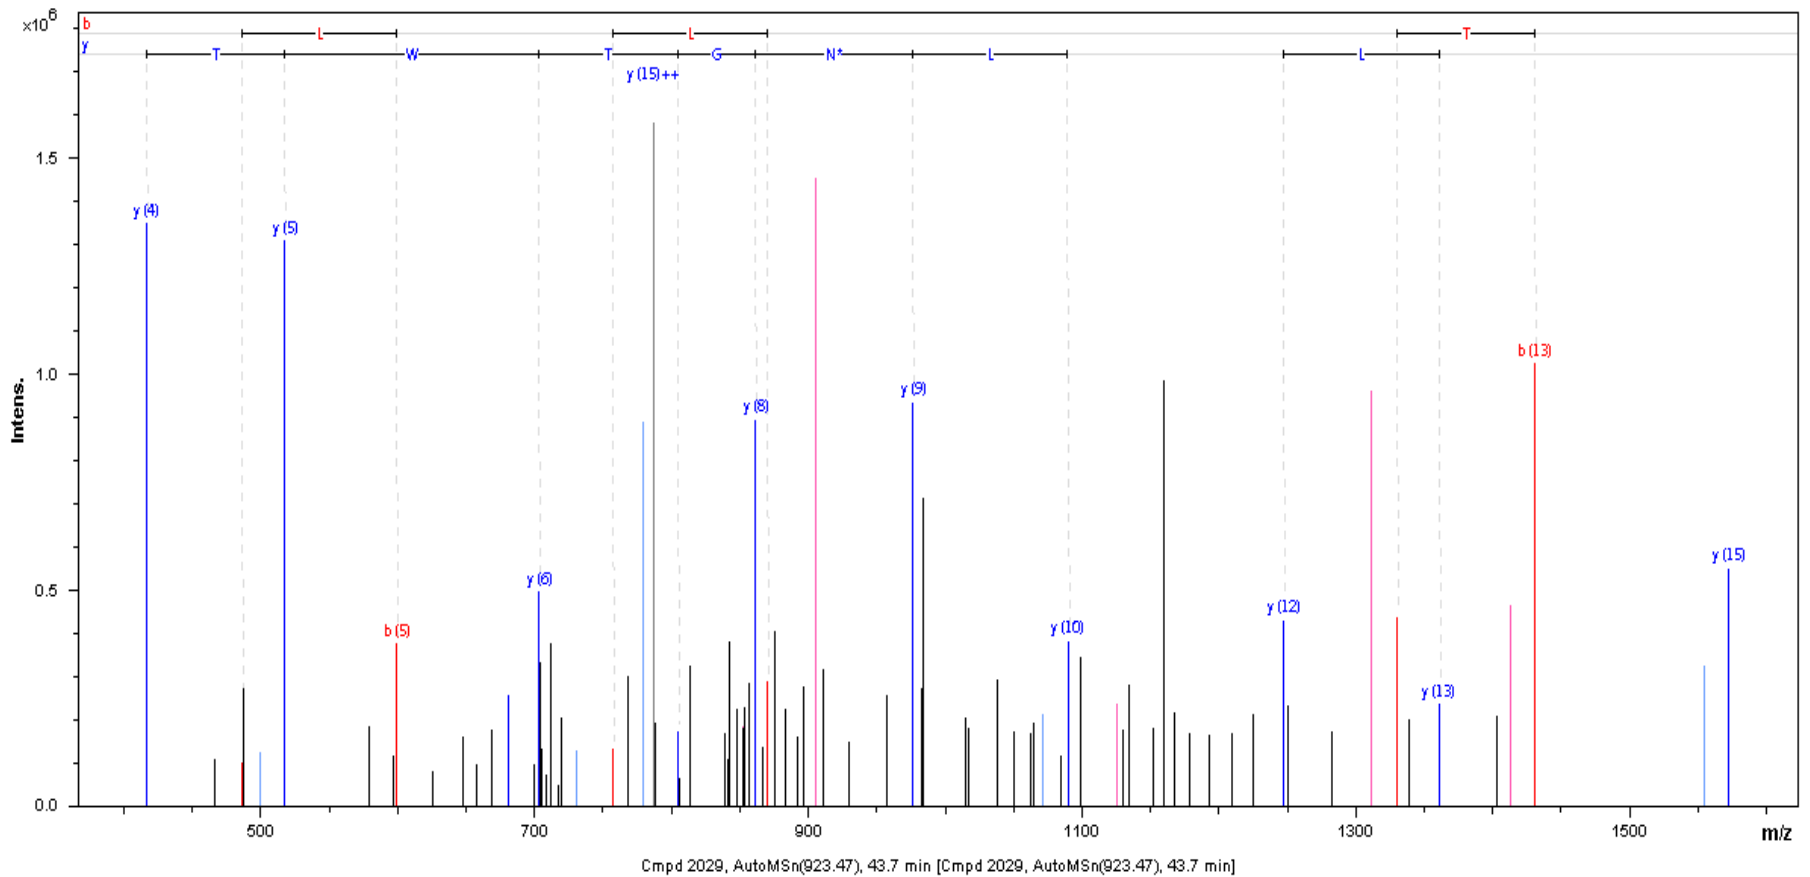

Cation channel sperm-associated protein subunit gamma 2

K.LYNMSGDYGIPDLFFLDK.G

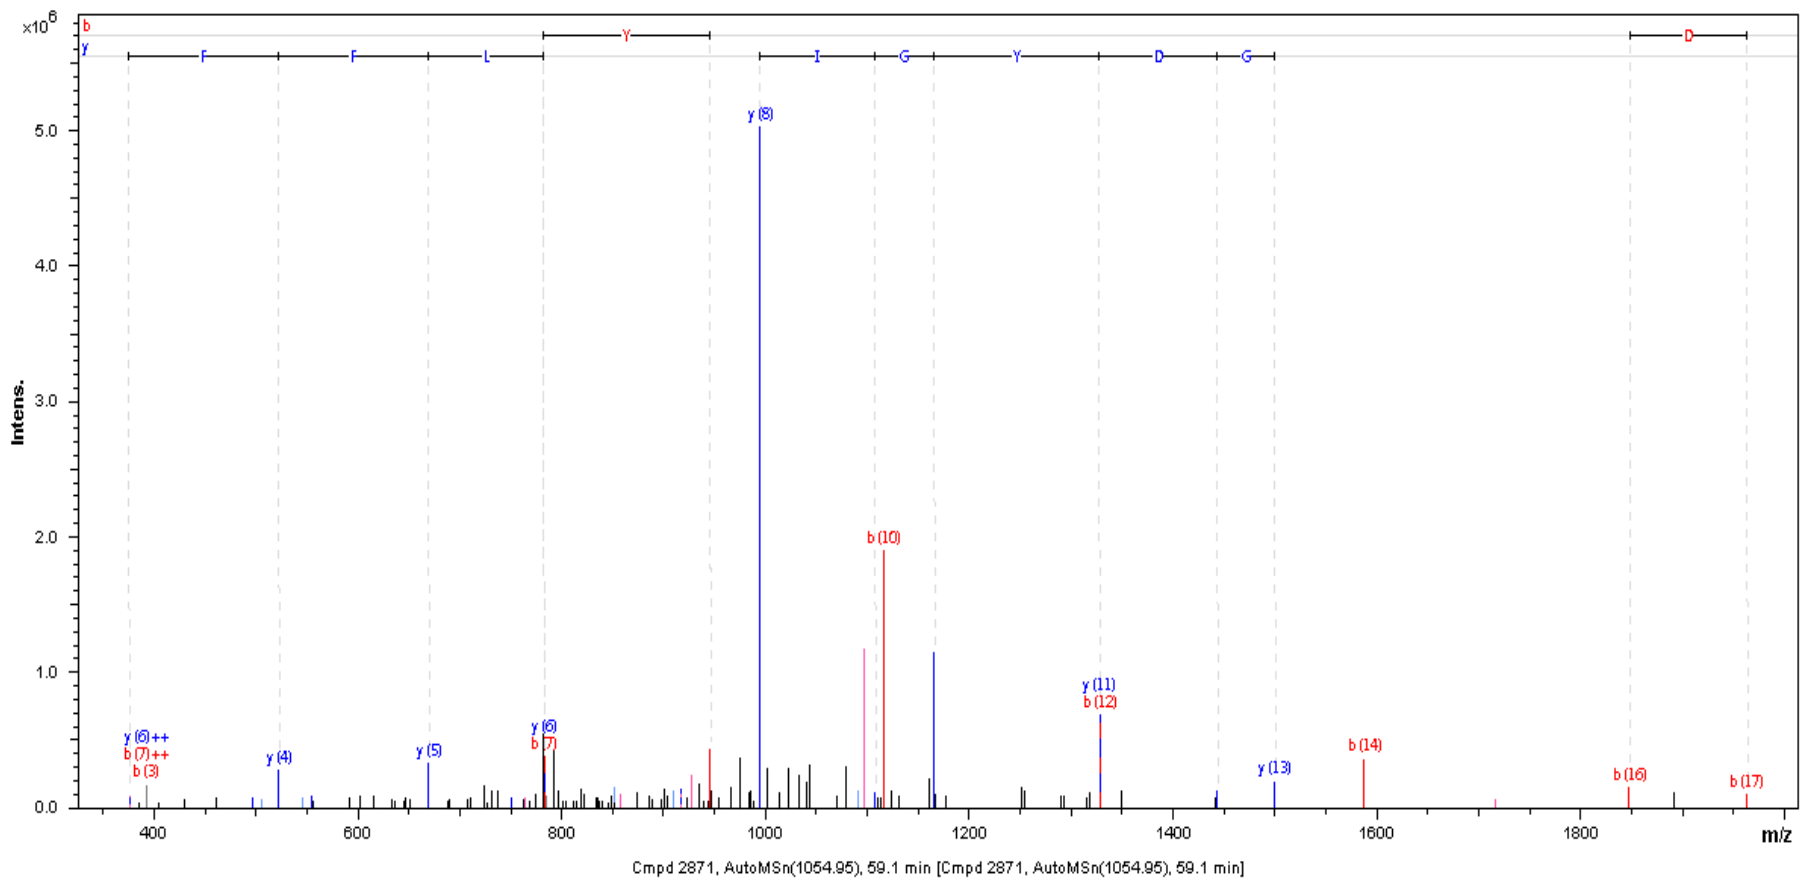



Cation channel sperm-associated protein subunit gamma 2

R.GVDNSTYCDYK.L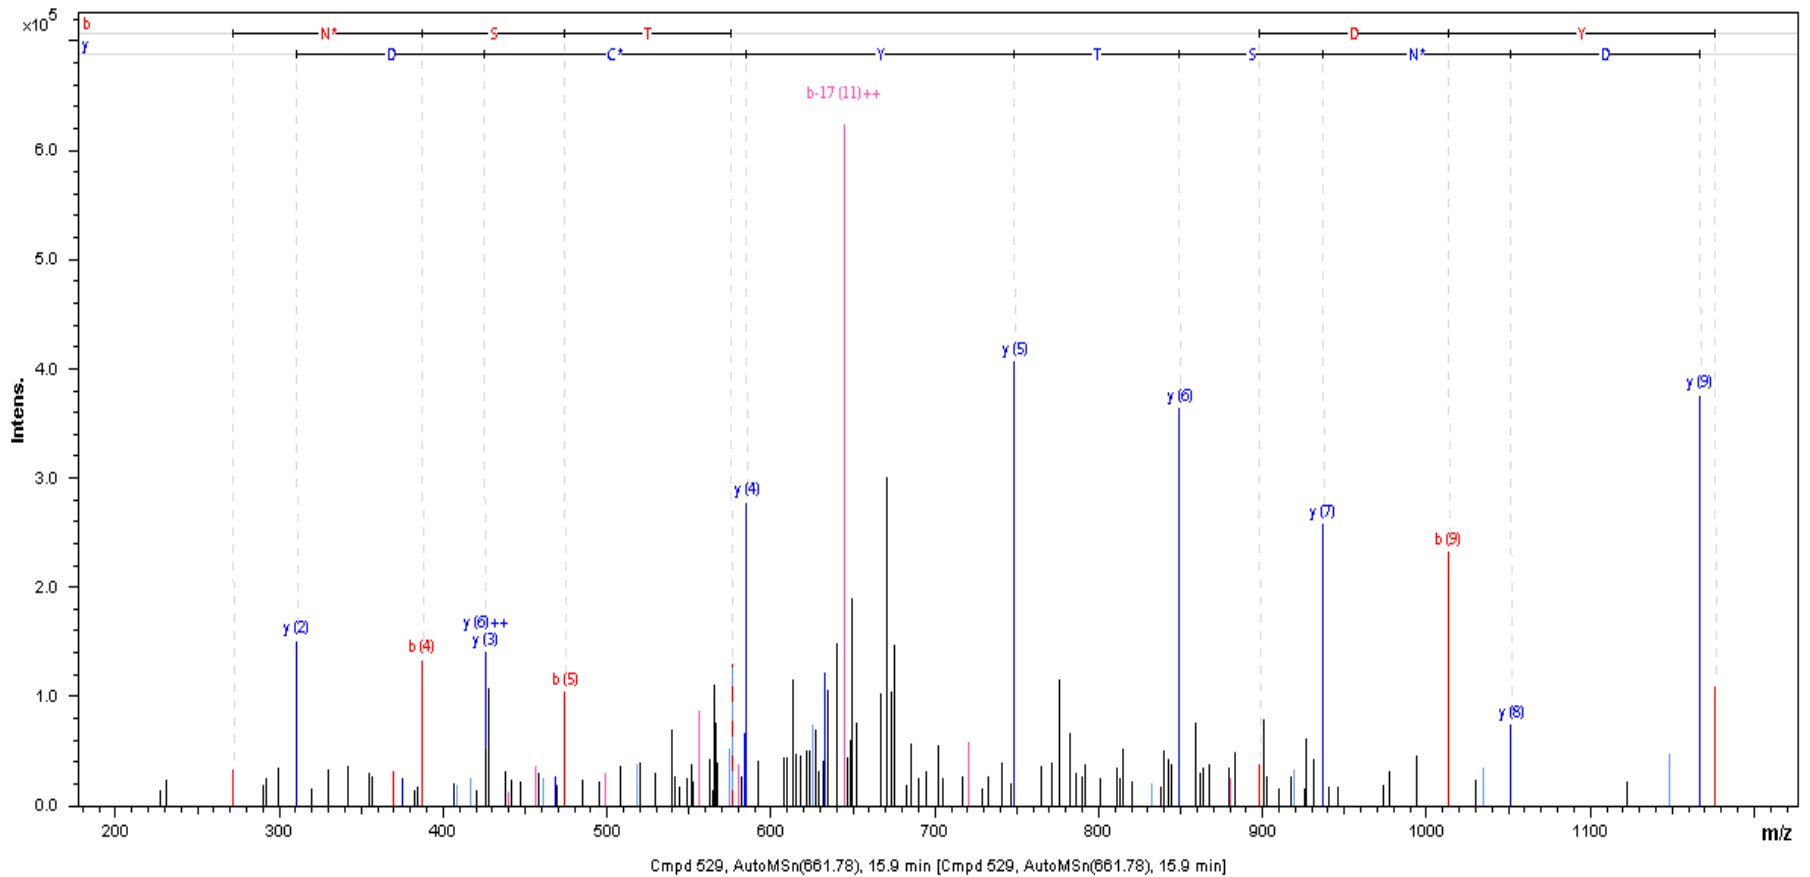

Cation channel sperm-associated protein subunit beta

K.TPVYNPLGLNLTIQGSELFHK.V \*

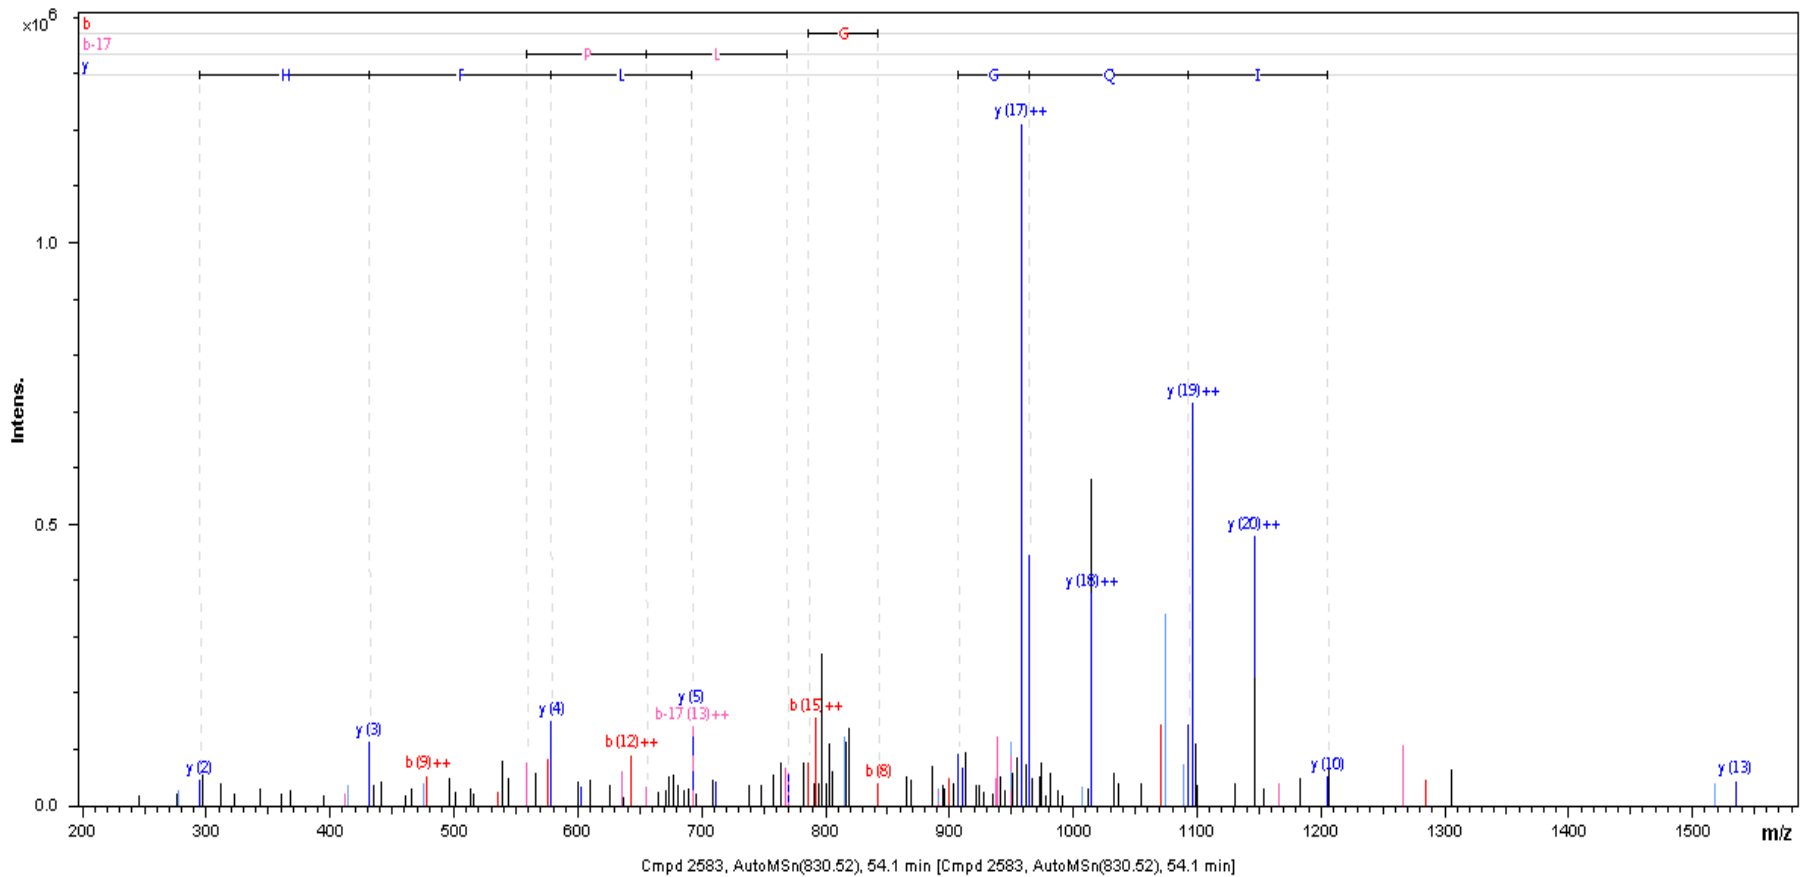

CUB and zona pellucida-like domain-containing protein 1 precursor

K.ALVLQLSANENCTWTIERPENR.S \*

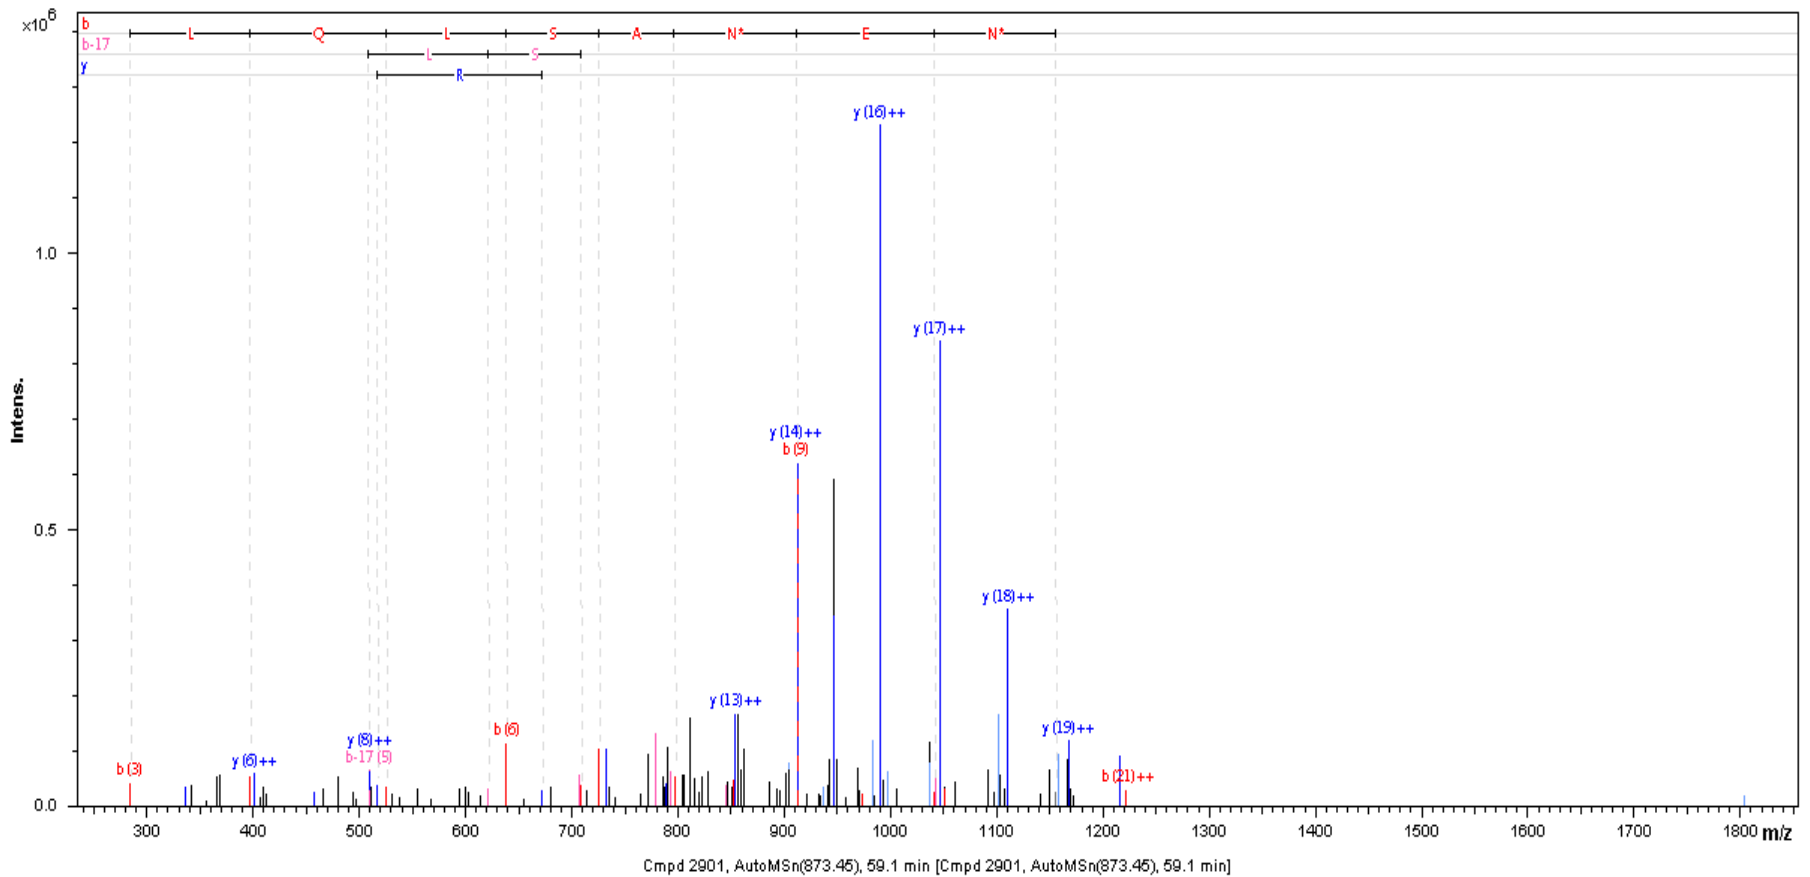

CUB and zona pellucida-like domain-containing protein 1 precursor

K.GFSASYTSIYIHDVNTTSLSCVSDK.M

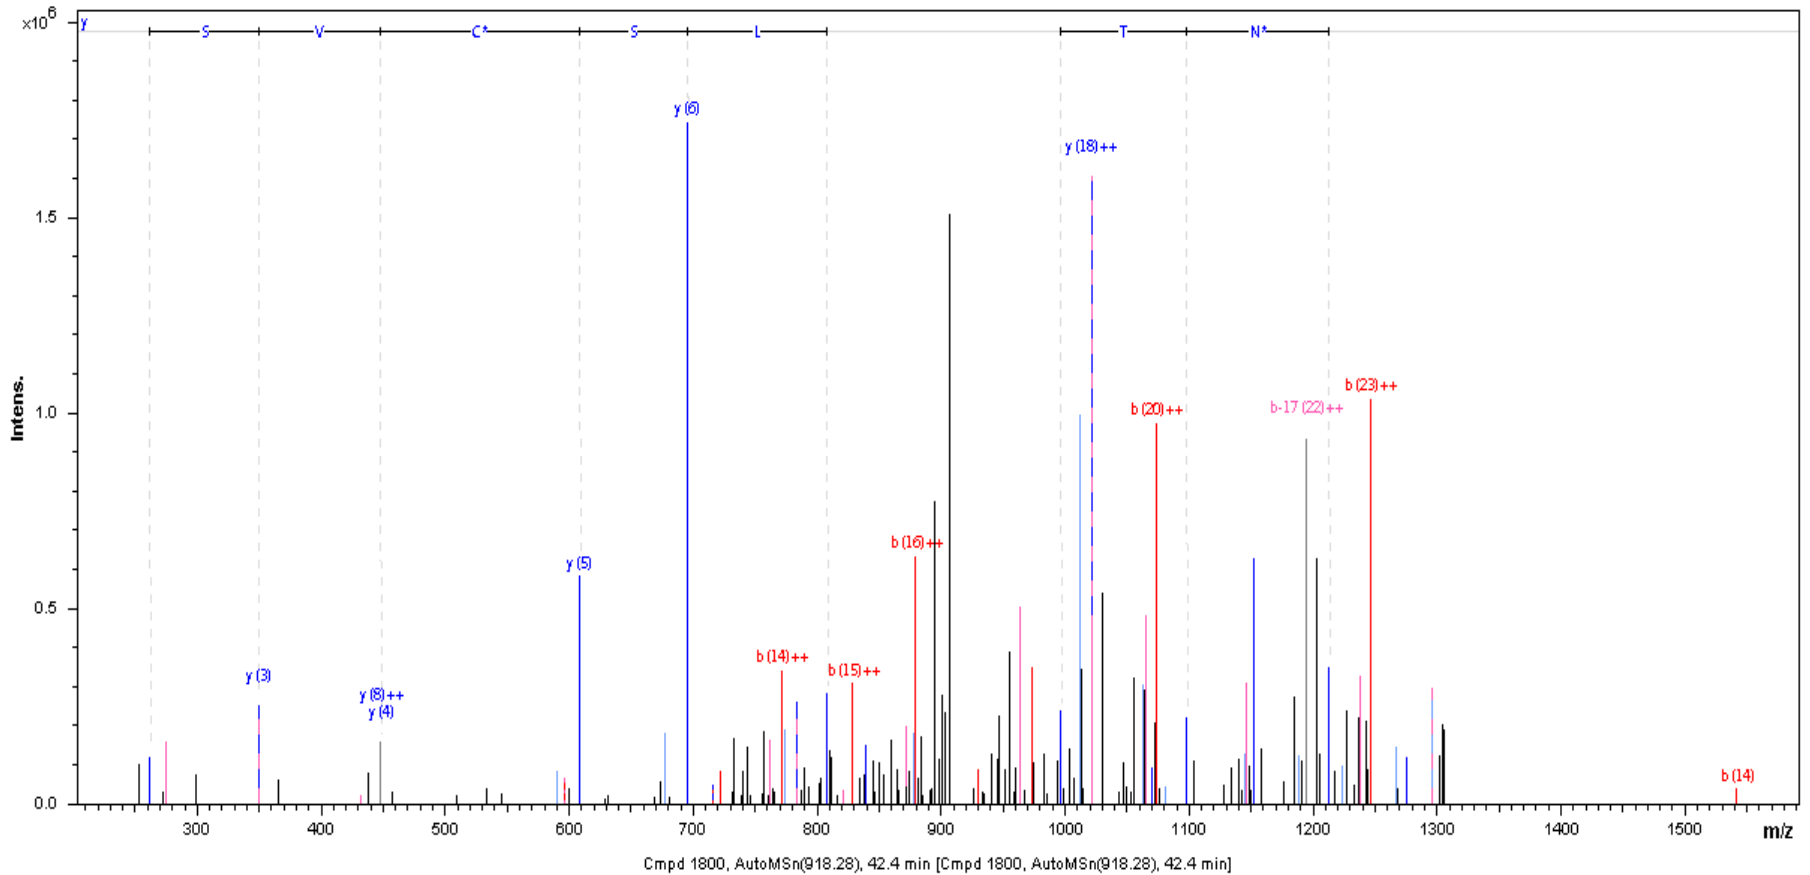

Dickkopf-like protein 1 precursor

K.VTDNQTGEVLISEK.V

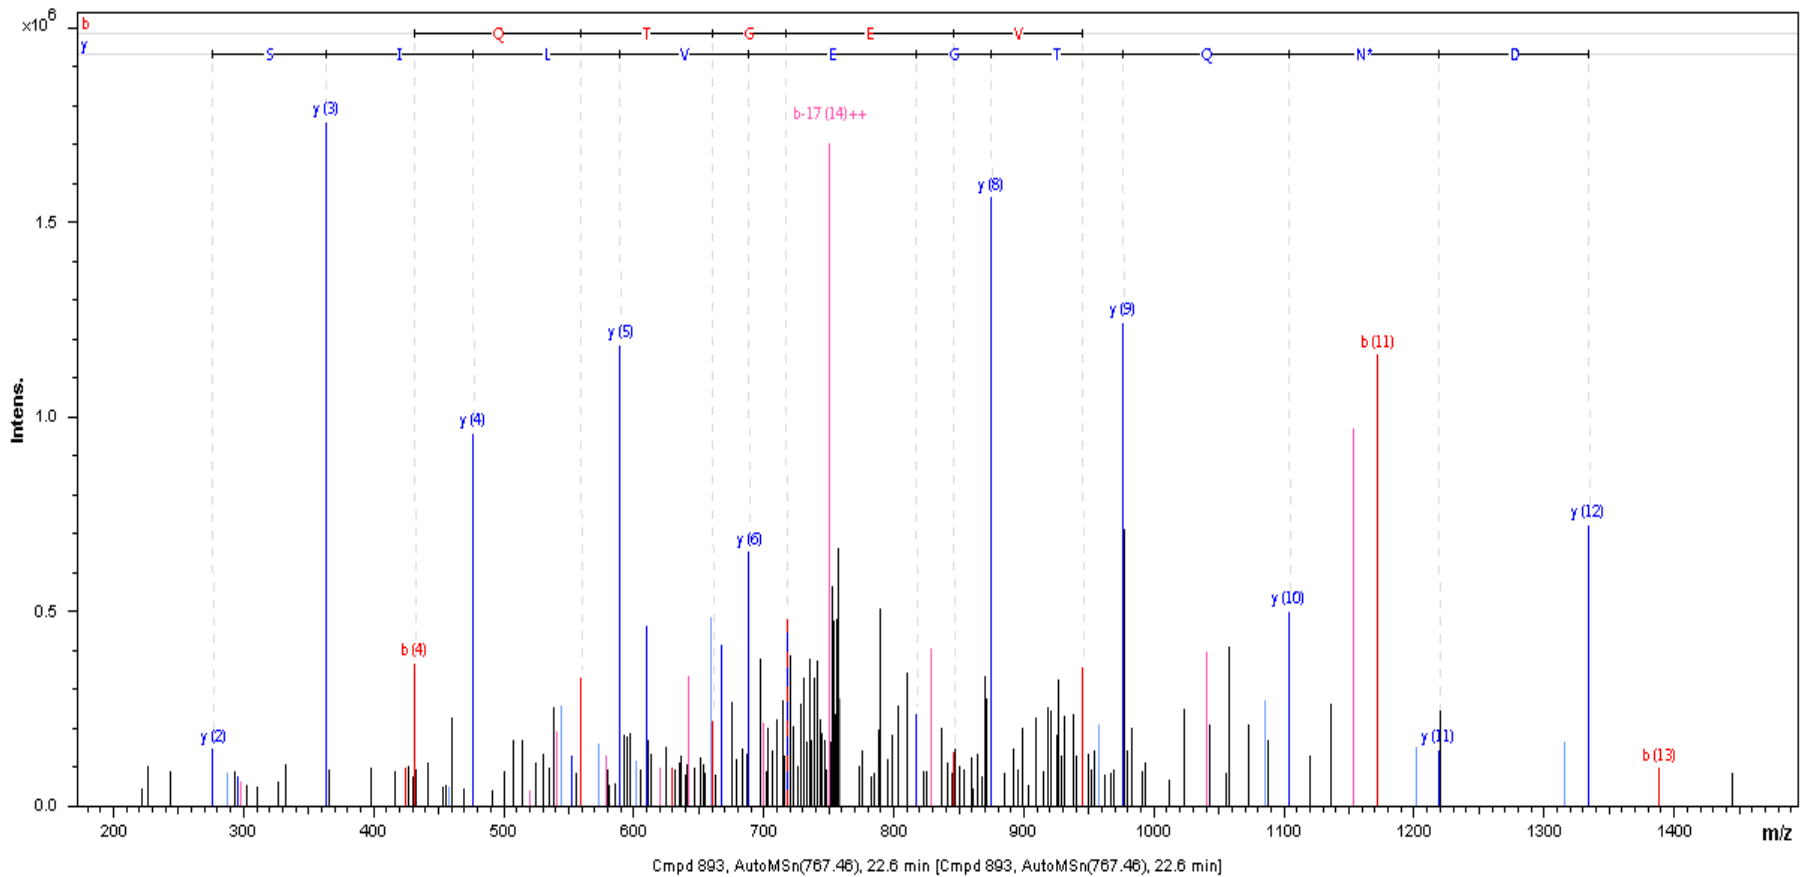

Dipeptidase 3 precursor

R.HHFYTNISGLTSFGEK.V

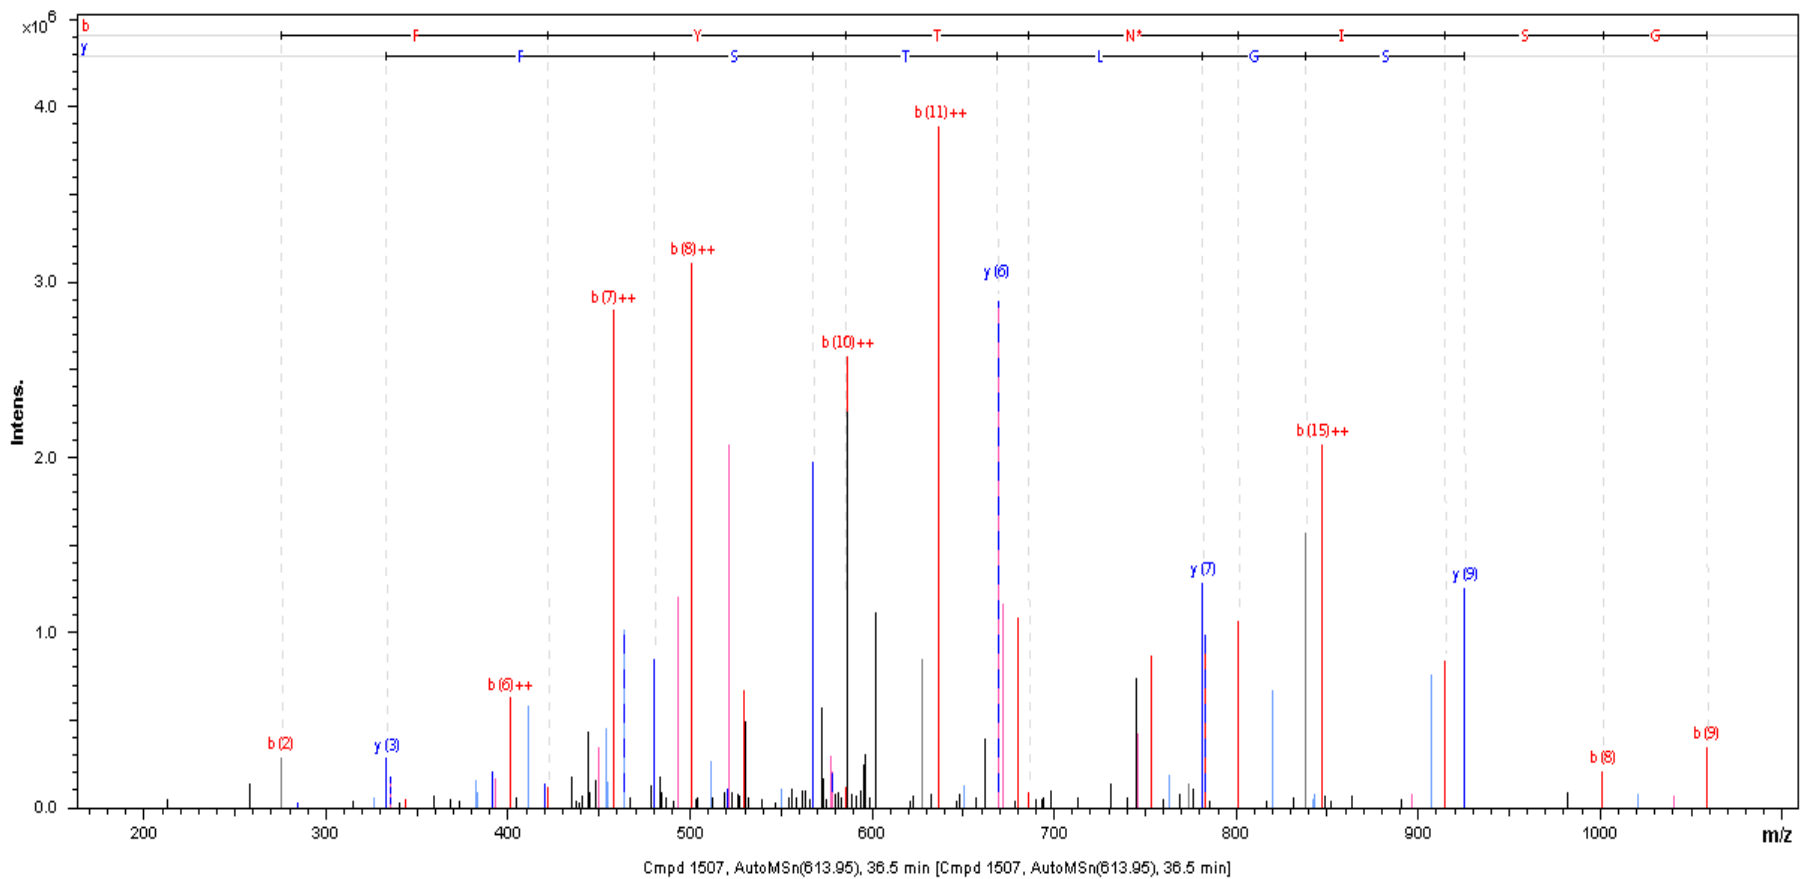

Dipeptidase 3 precursor

R.MCSAYPELELVTSADGLNNTQK.L

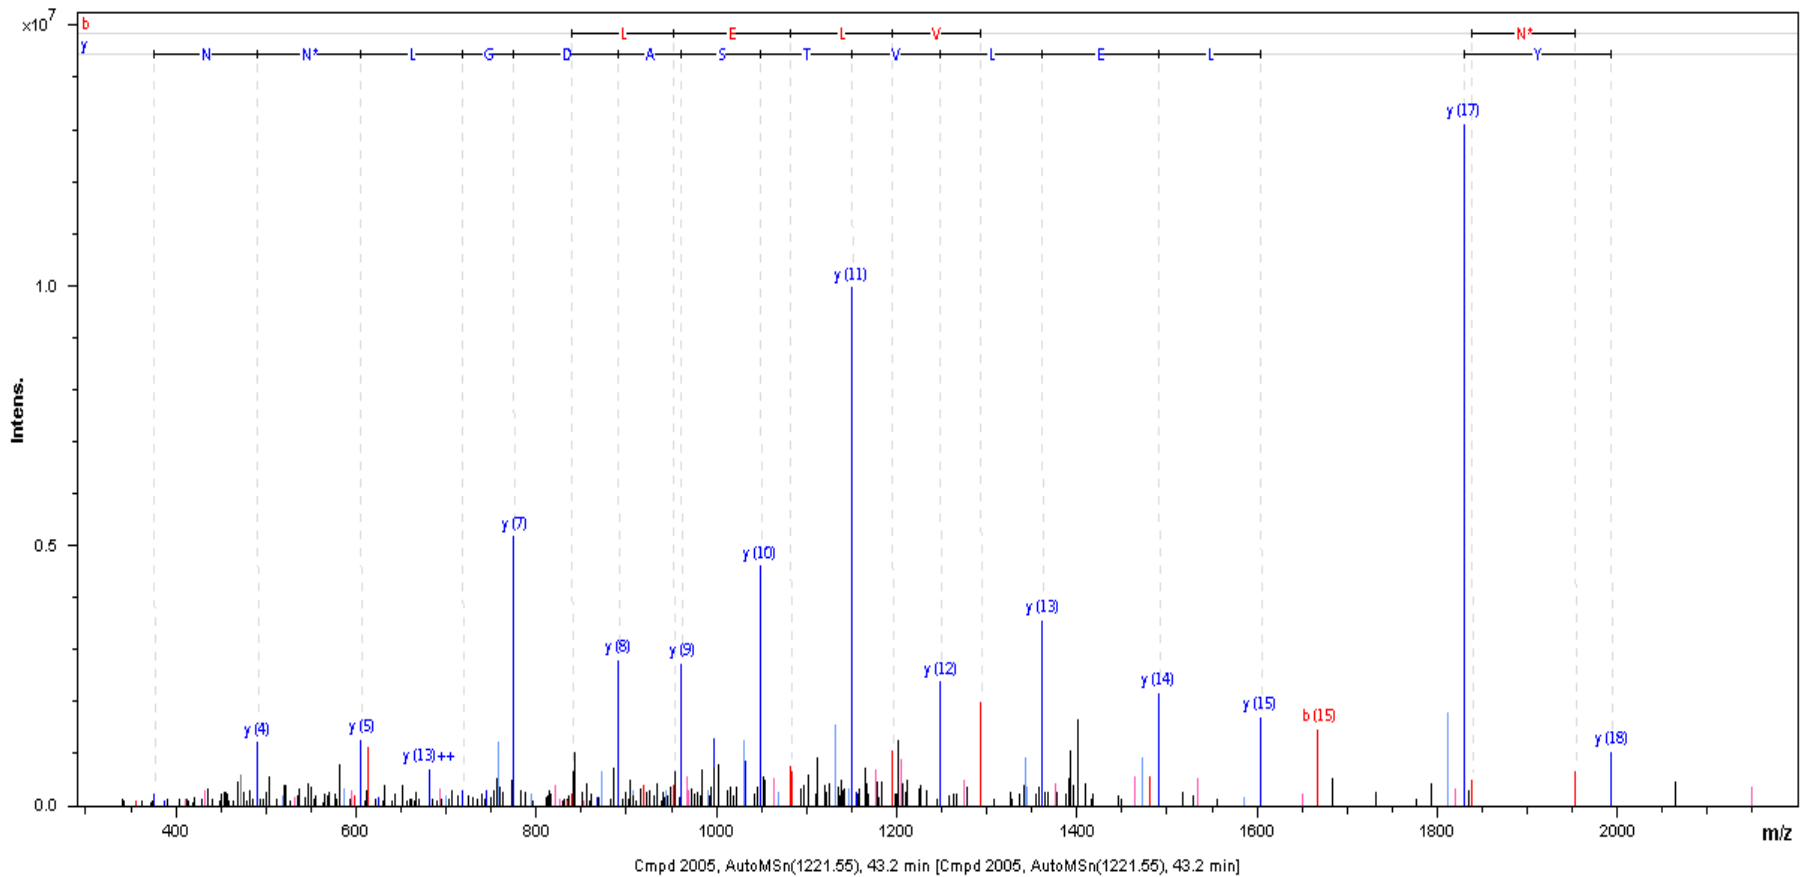

Embigin precursor

K.KDDEPLETTGDFNTTK.M

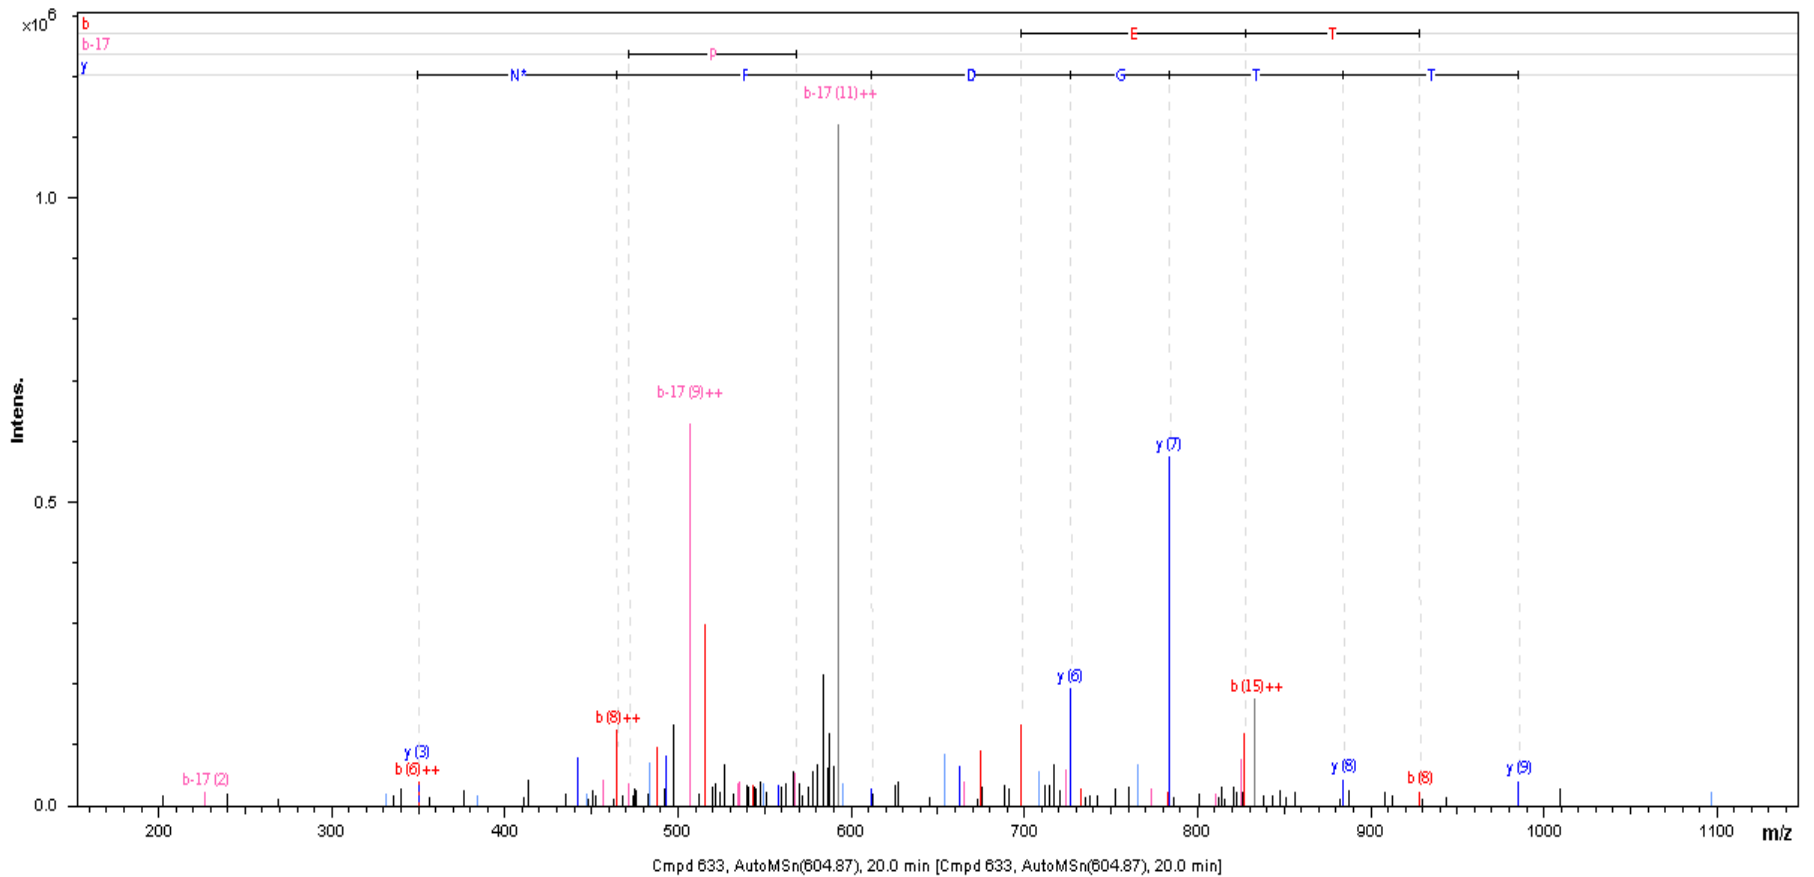



Embigin precursor

K.YIINGSHANETR.L

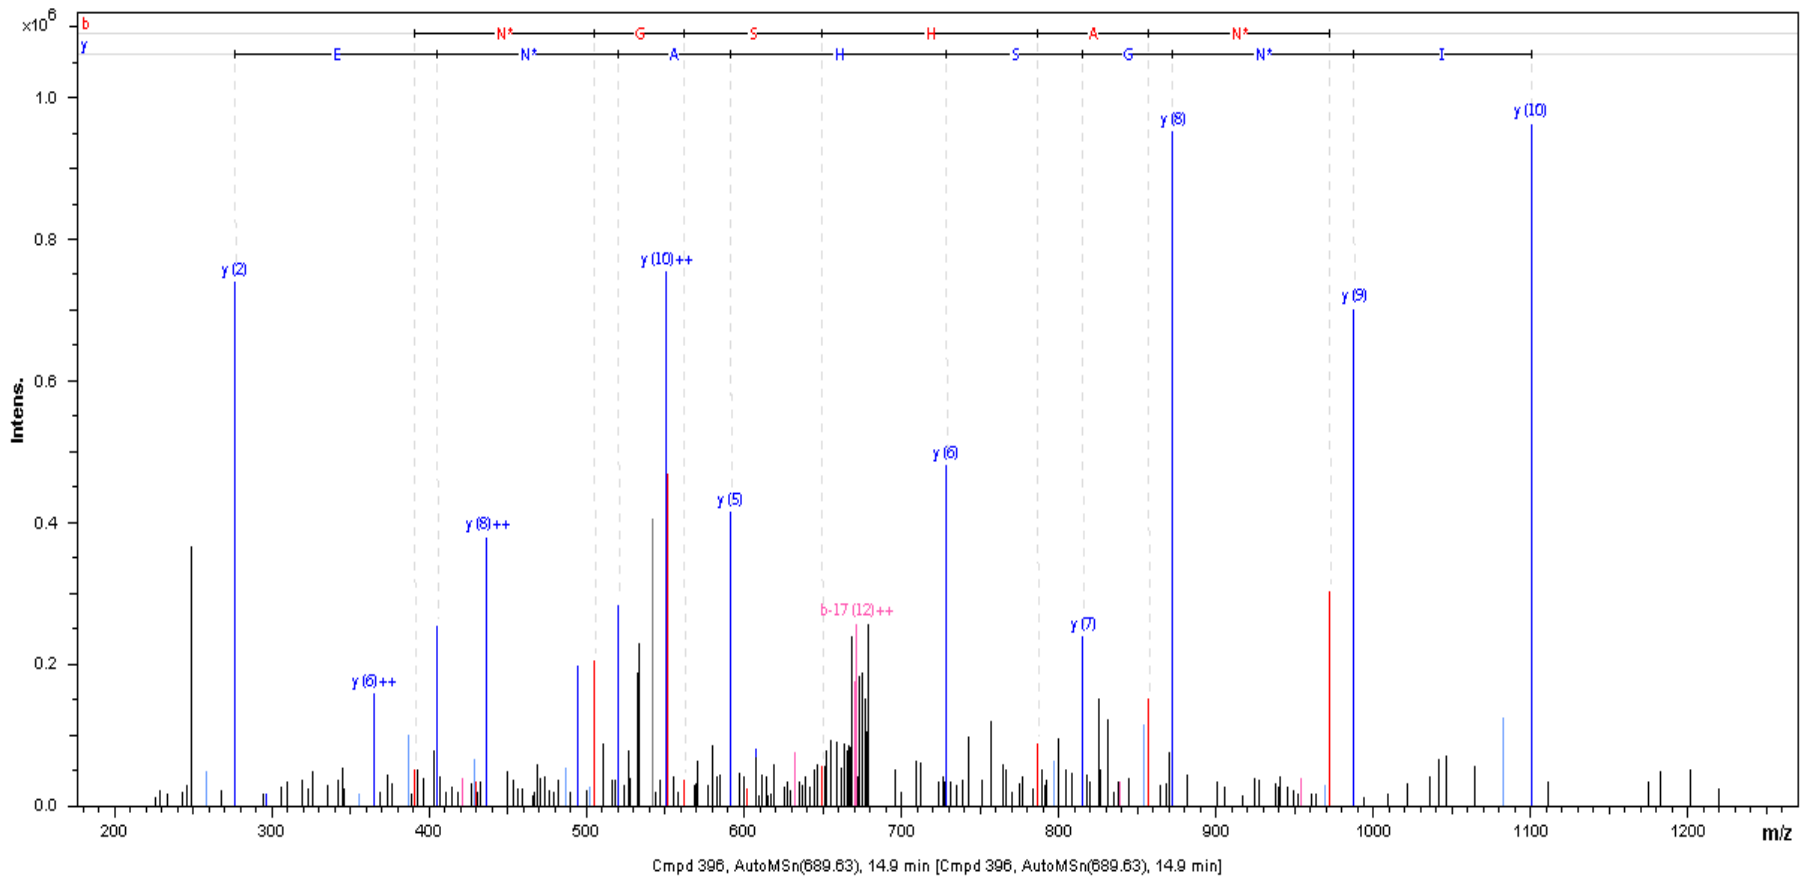

Endoplasmin precursor

K.HNNDTQHIWESDSNEFSVIADPR.G \*

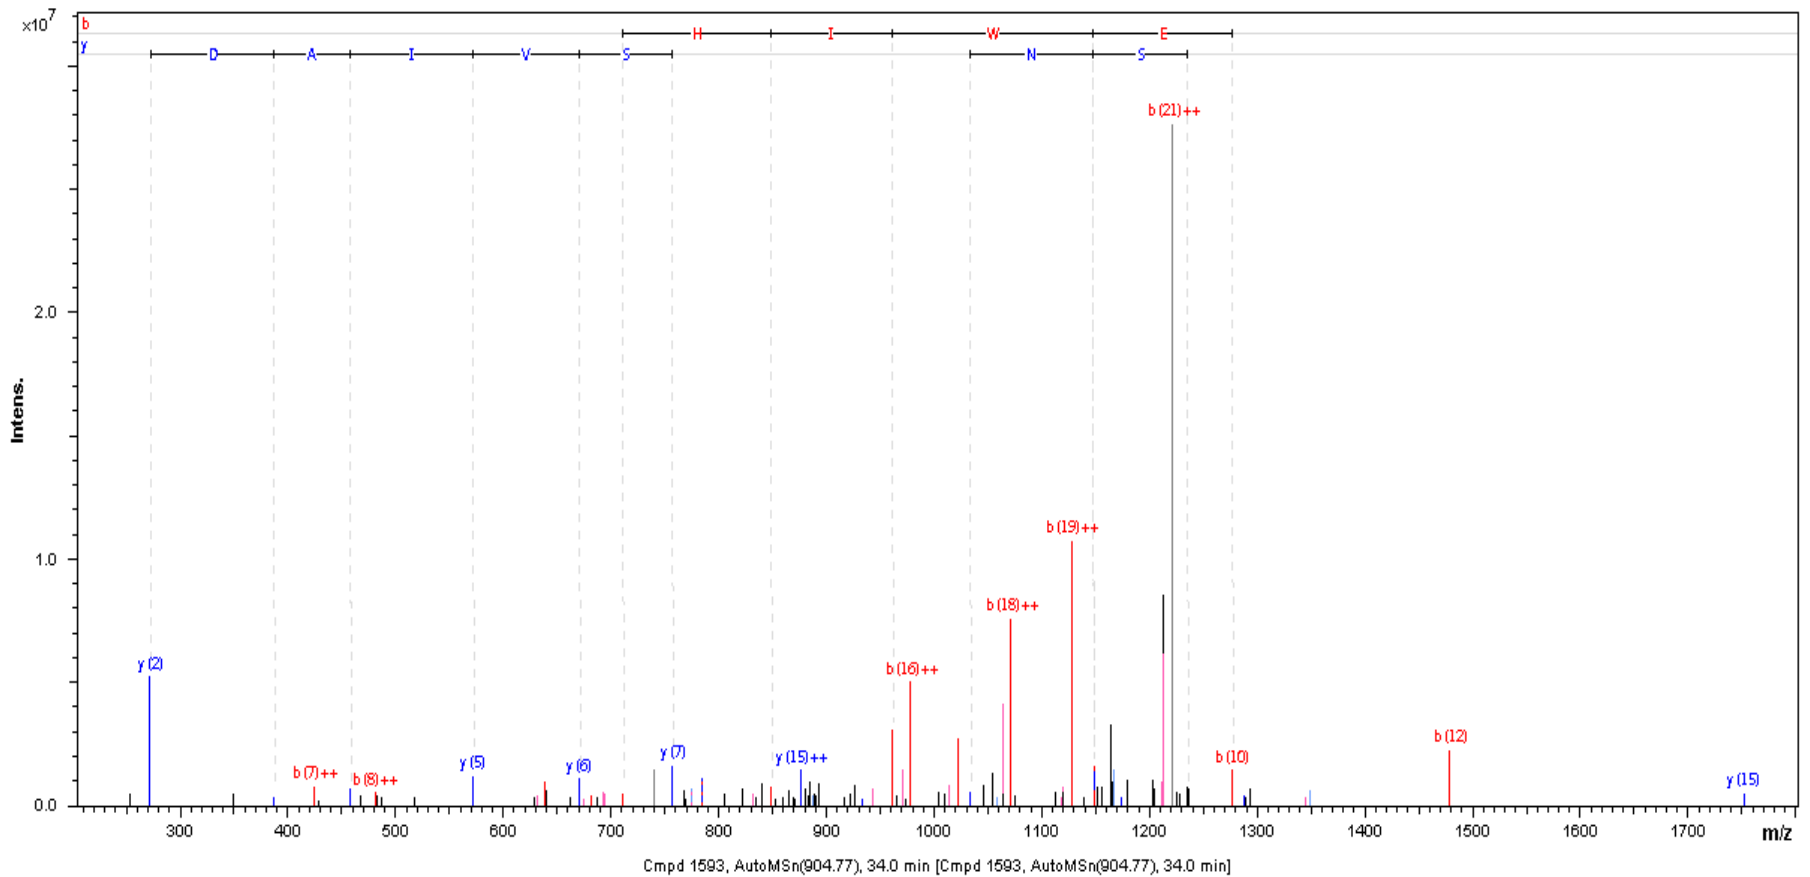

Endoplasmin precursor

R.TDDEVVQREEEAIQLDGLNASQIR.E

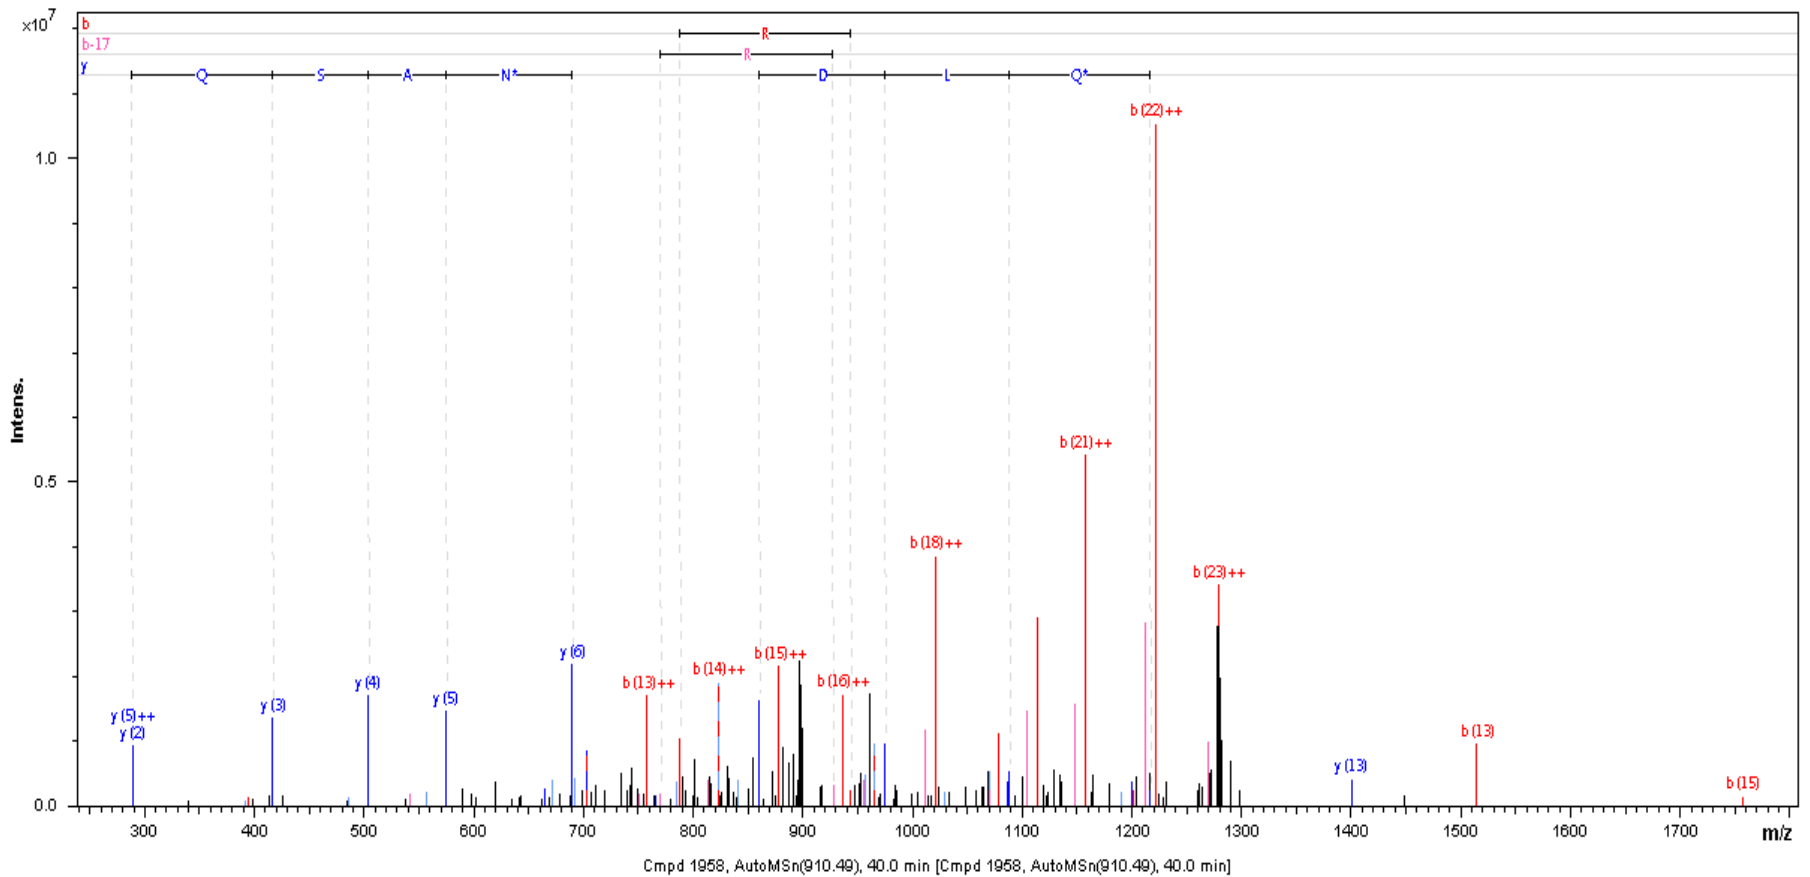

Equatorin

K.AVNETAVSMDDK.D

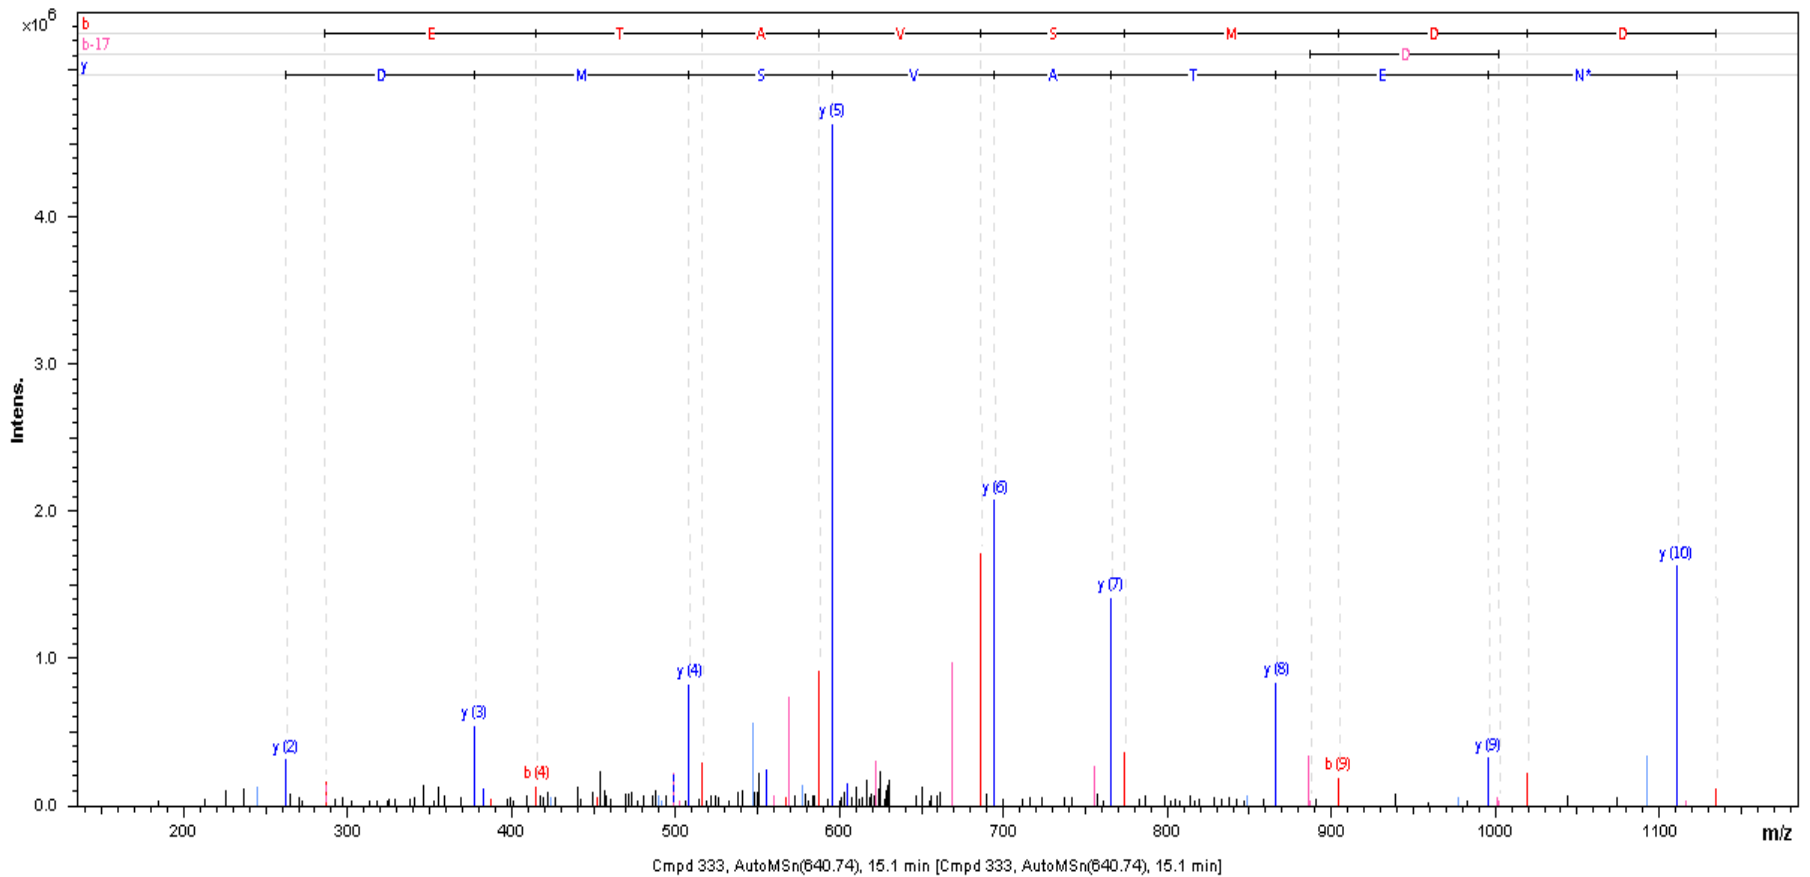

Equatorin

K.DQFFQPIPASDLNATNEDK.L

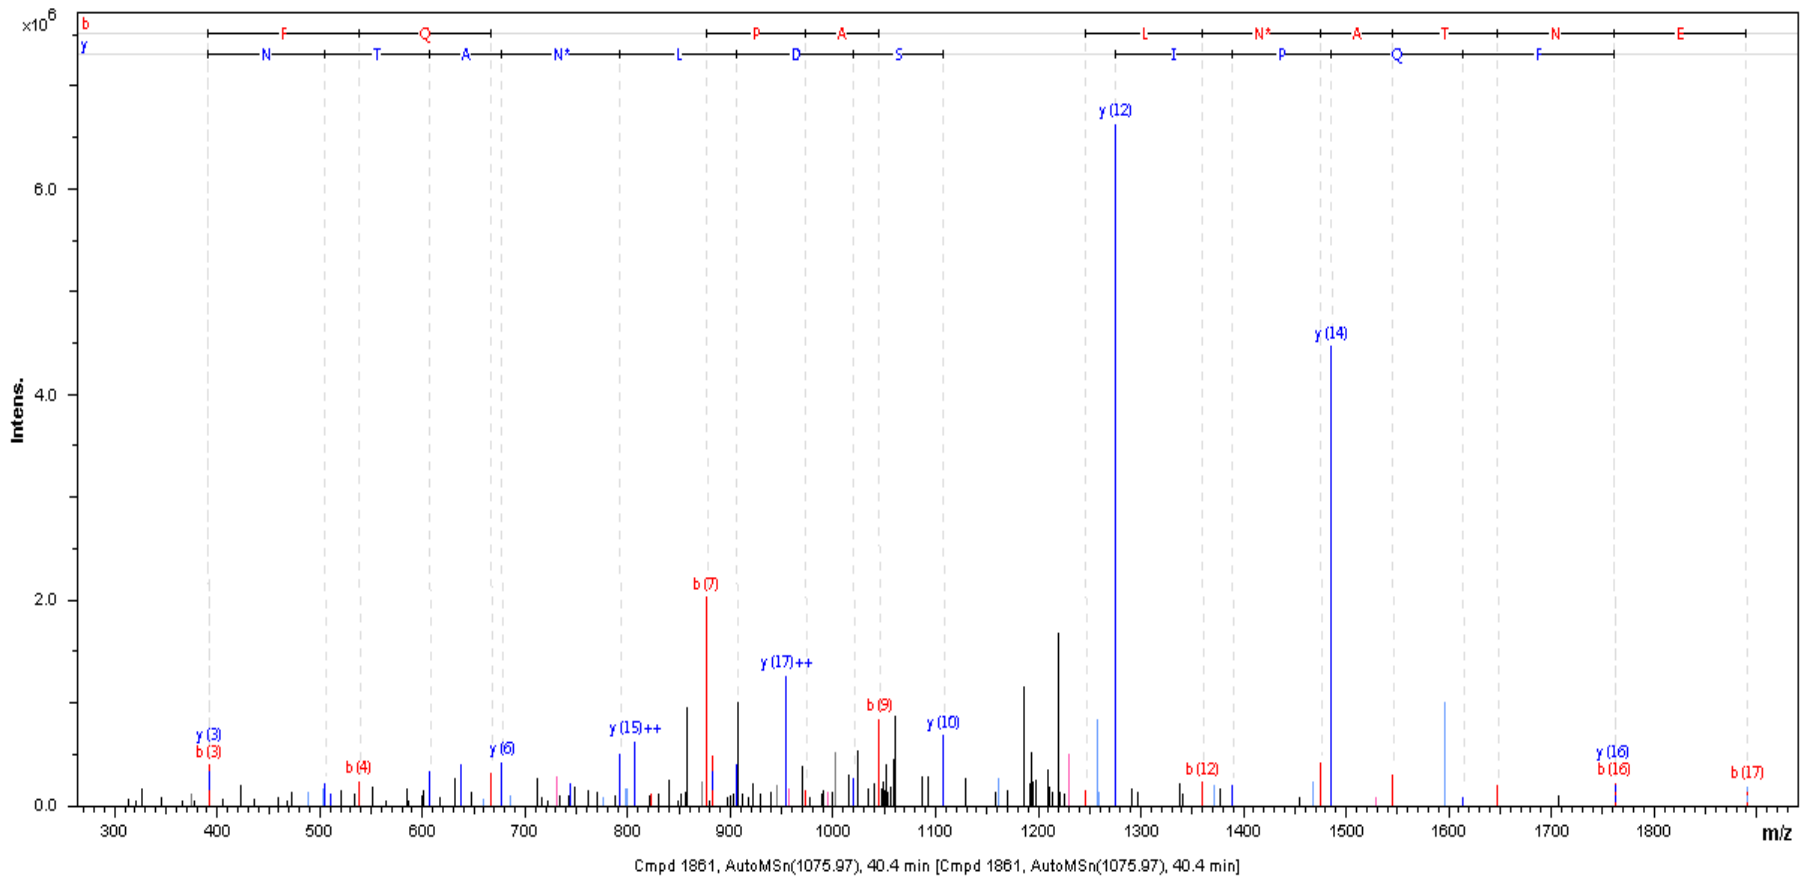

Carboxylesterase 5A

K.HDLQVVANVCDNCVSDSK.A

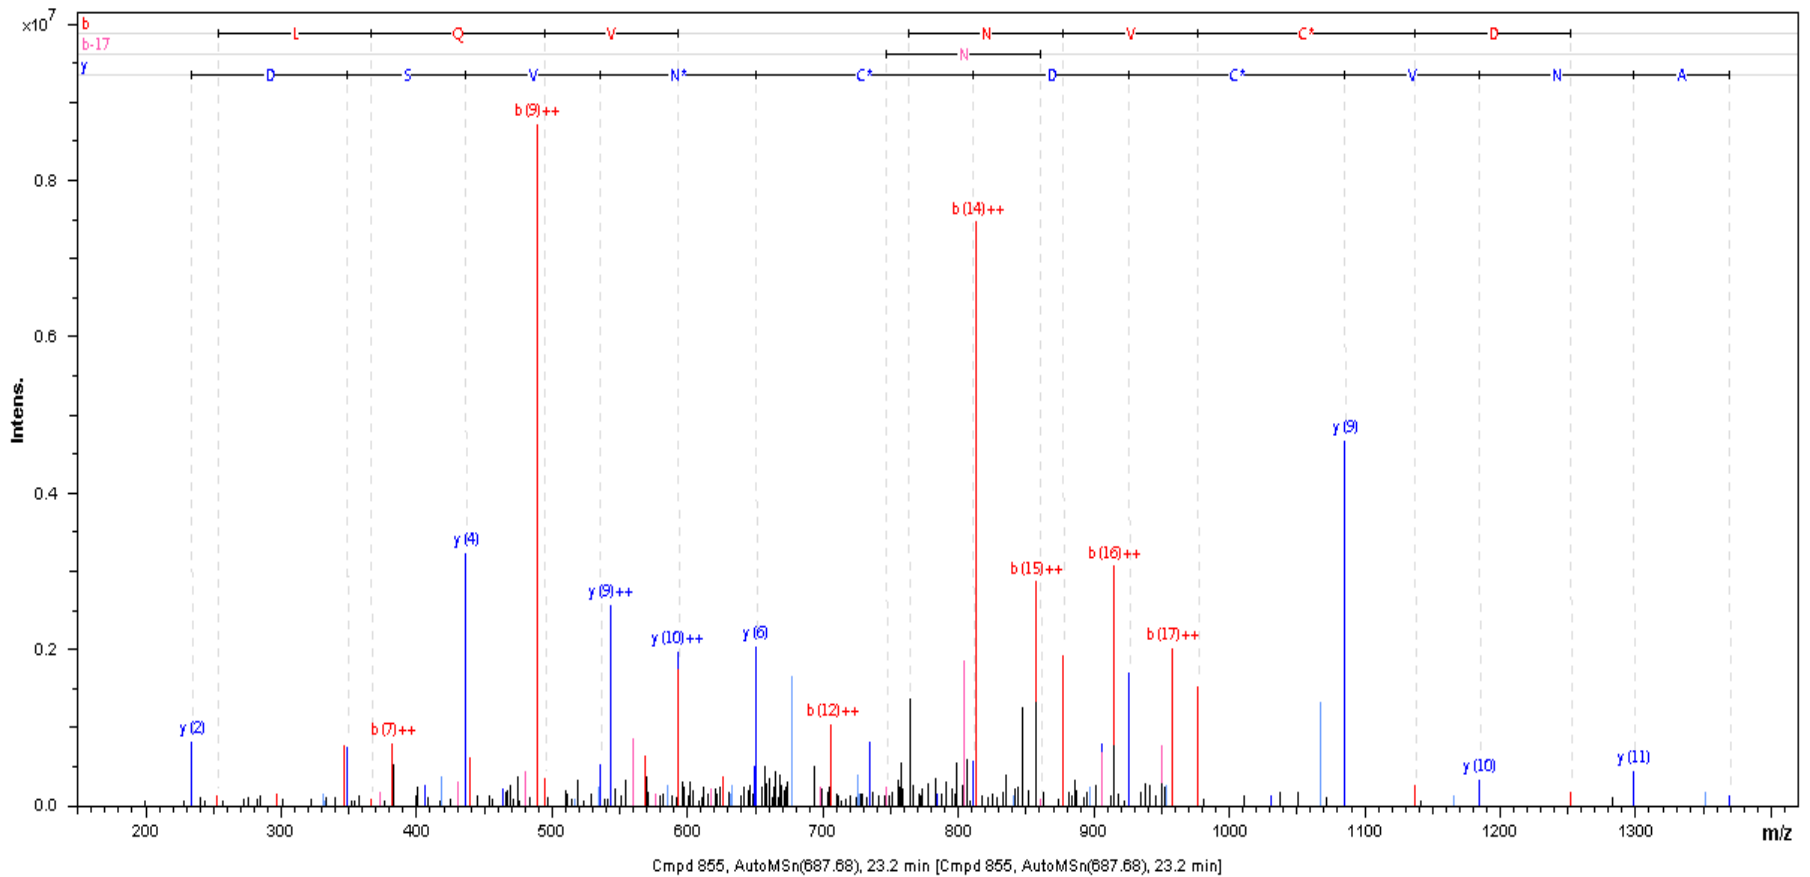

Interferon-induced guanylate-binding protein 1

K.LQE~~Q~~ERLLKQGFQ~~N~~ESLQLR.Q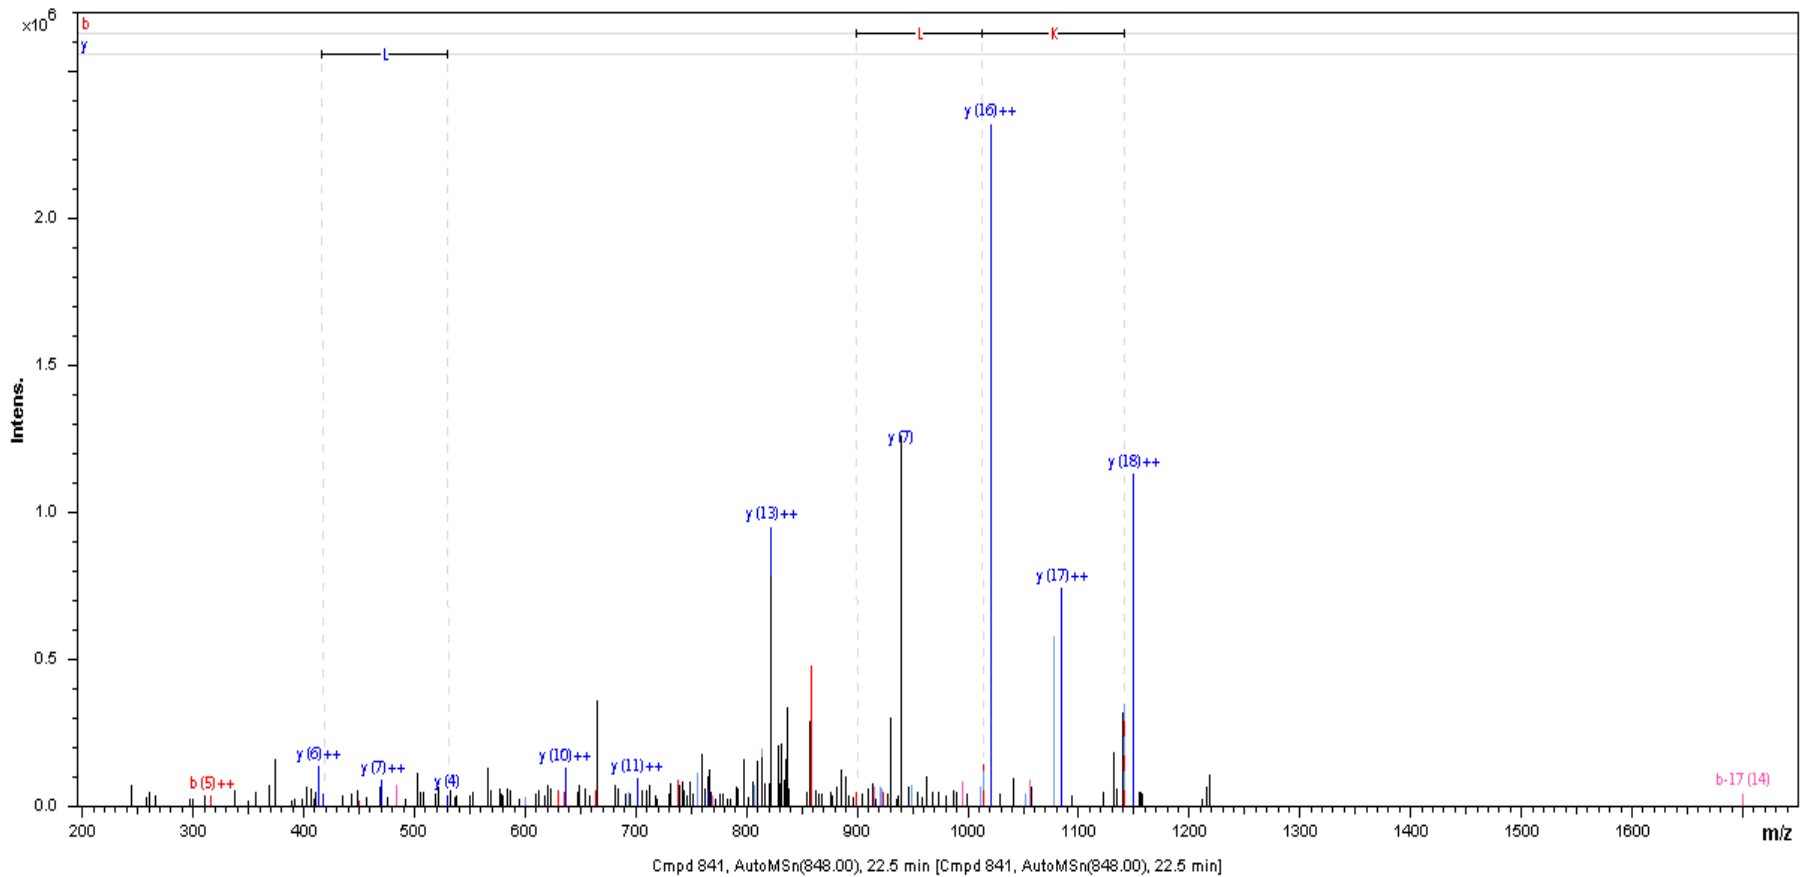

Glycerophosphodiester phosphodiesterase domain-containing protein 4

K.EVLPSAAGNHTSNFNWTFLLSTLNAGK.W \*

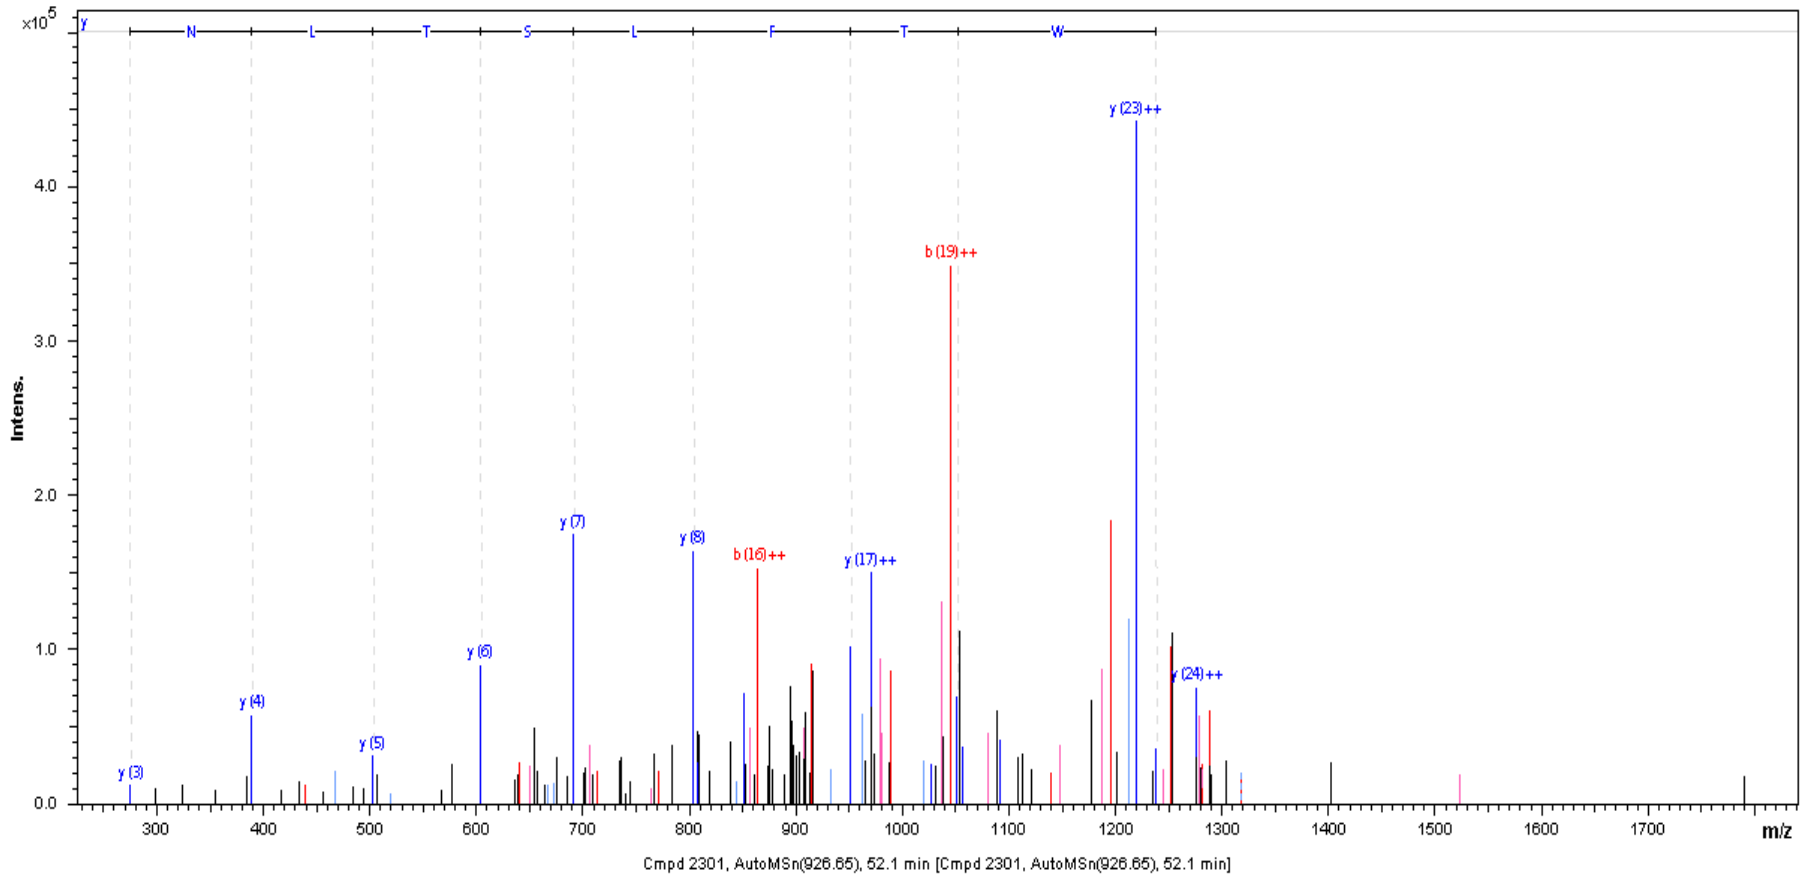



Gamma-glutamyltranspeptidase 1 precursor

R.LANTTMFNSK.D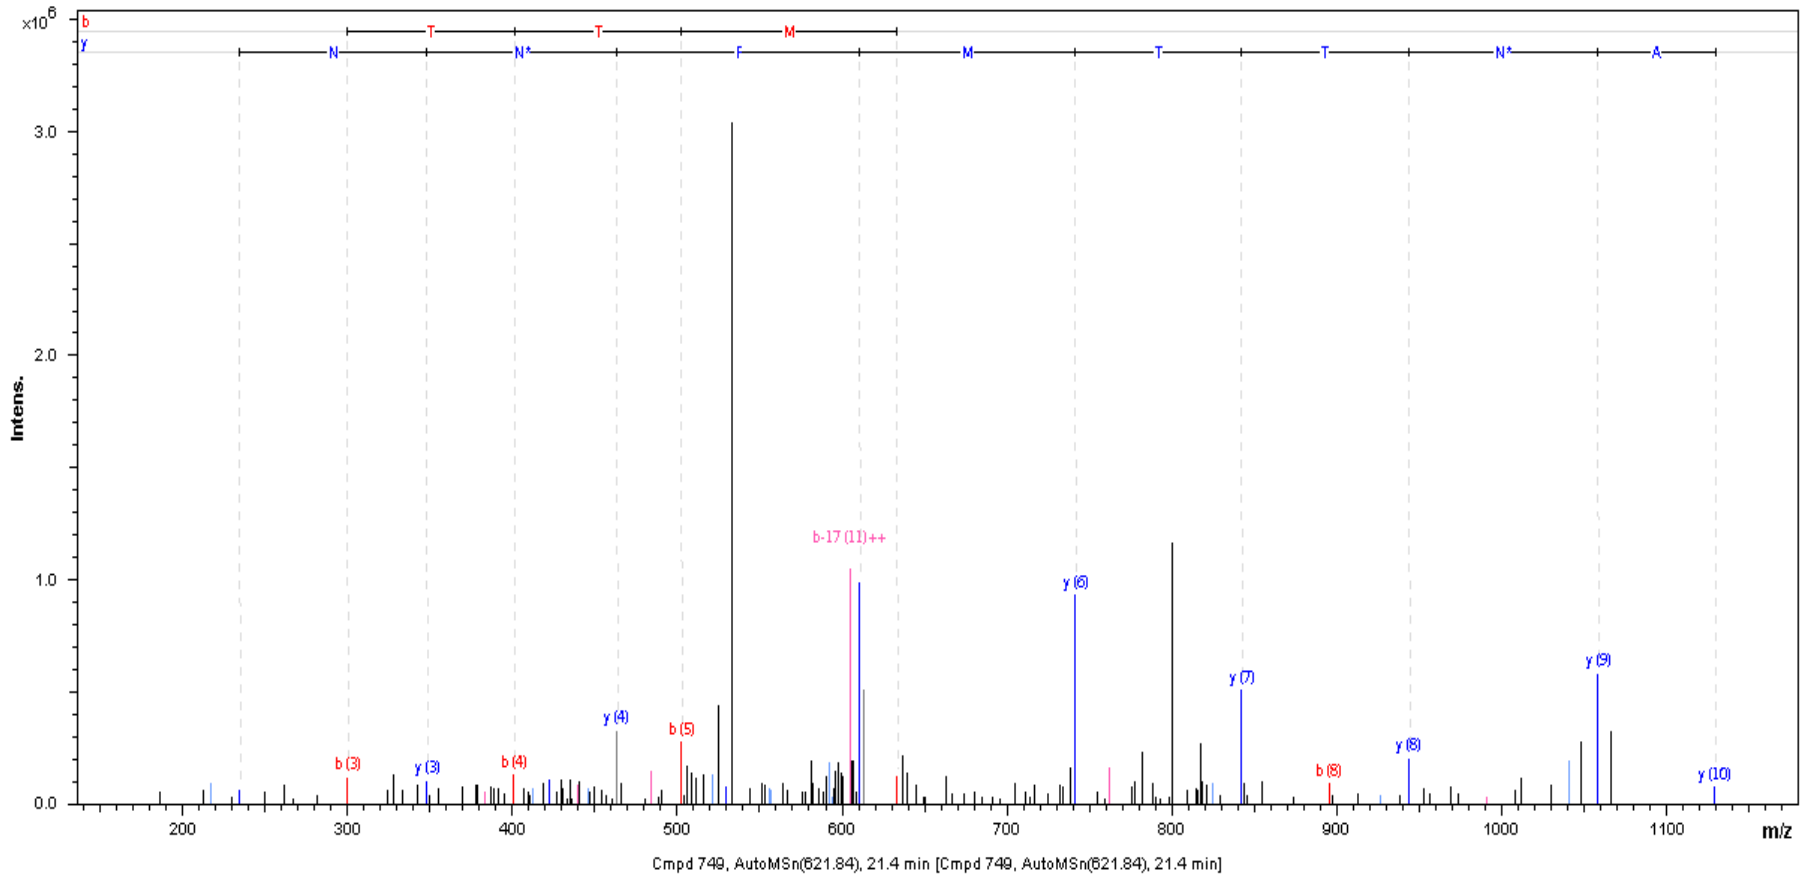

Gamma-glutamyltransferase 7

R.TANHSAPSLENSVQPGK.R

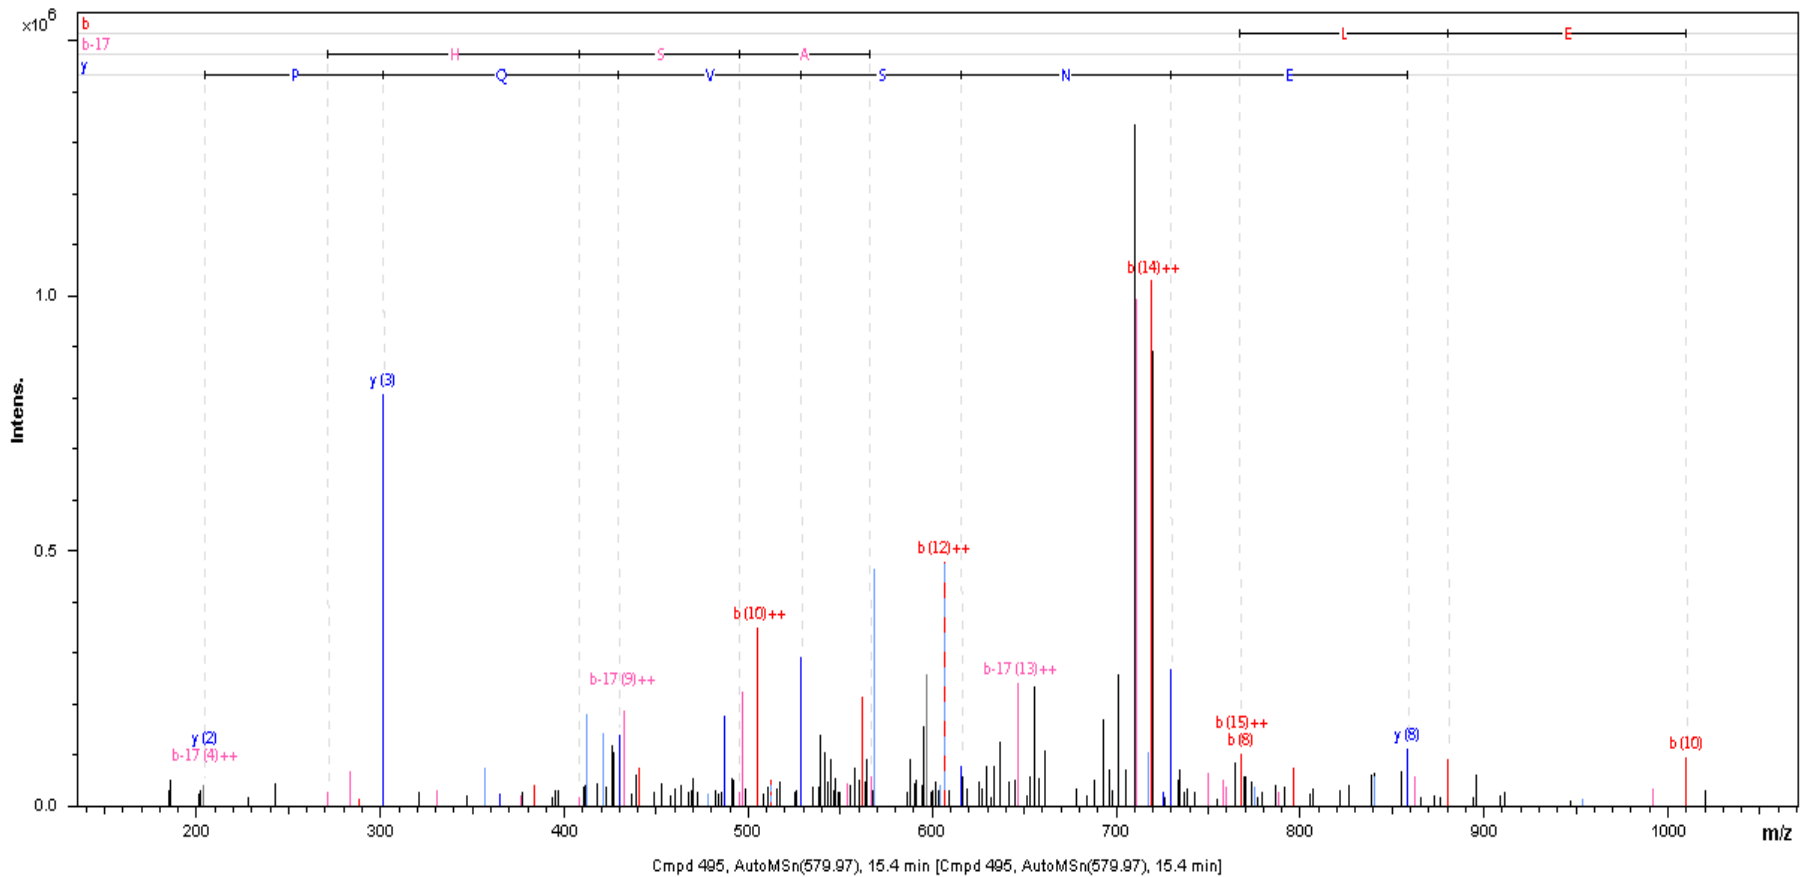

Beta-galactosidase-1-like protein

R.CGSLQGLYTTIDFGPADNVTR.I \*

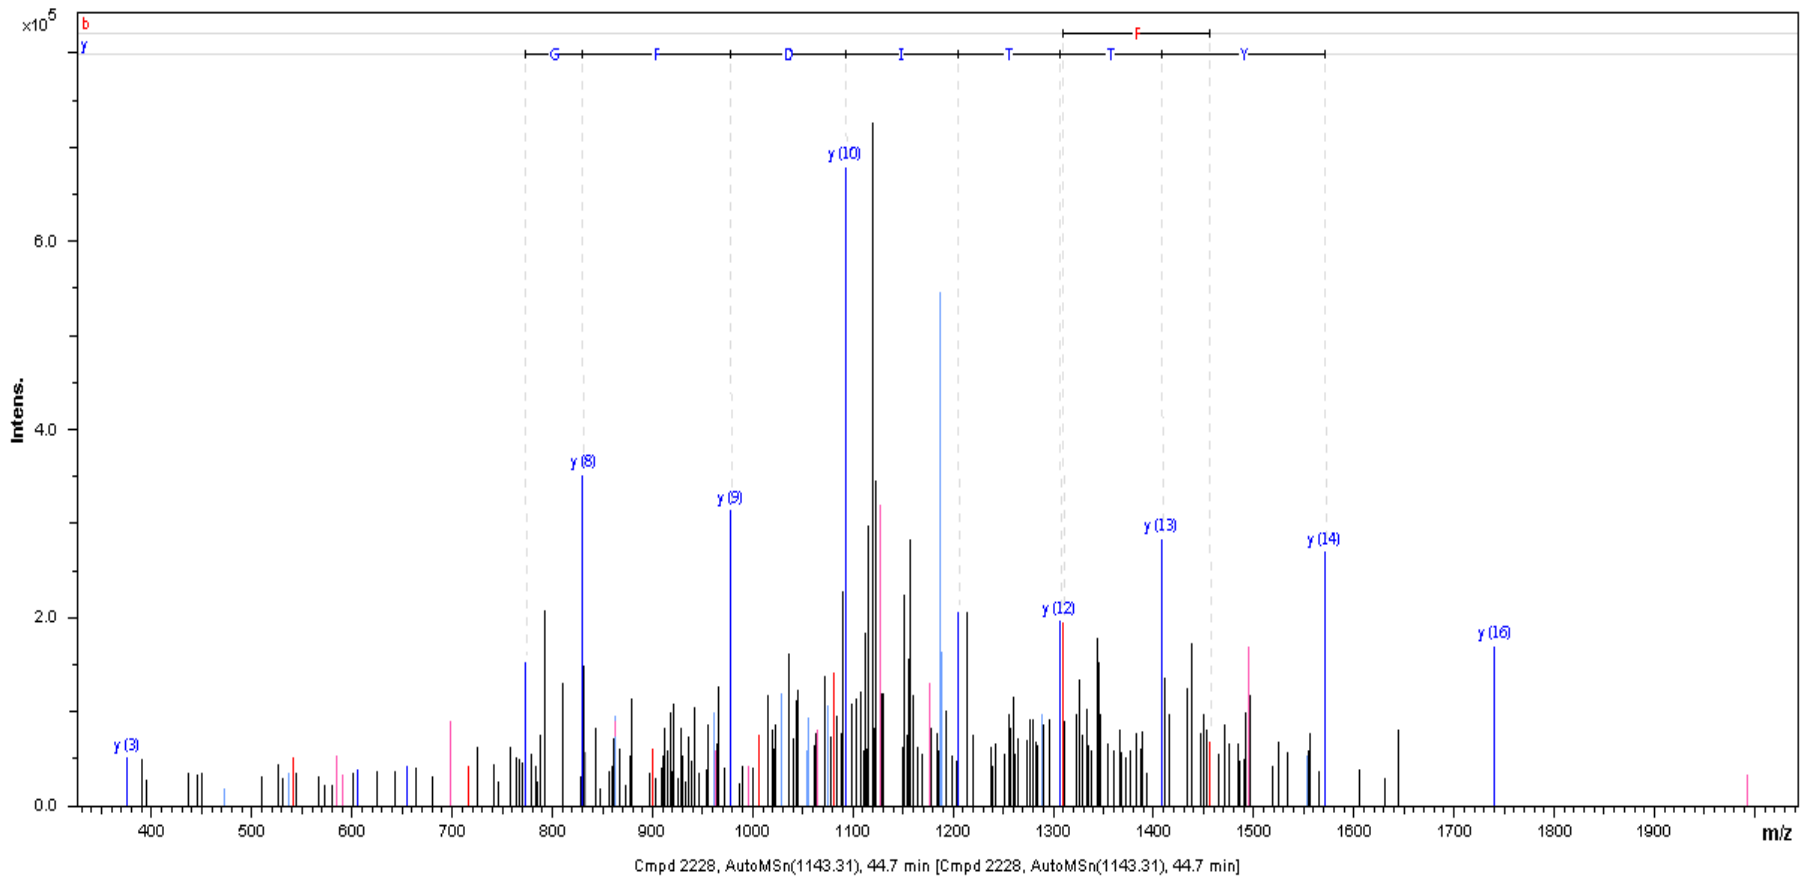

Solute carrier family 2, facilitated glucose transporter member 3

K.DFLNYTLEER.L

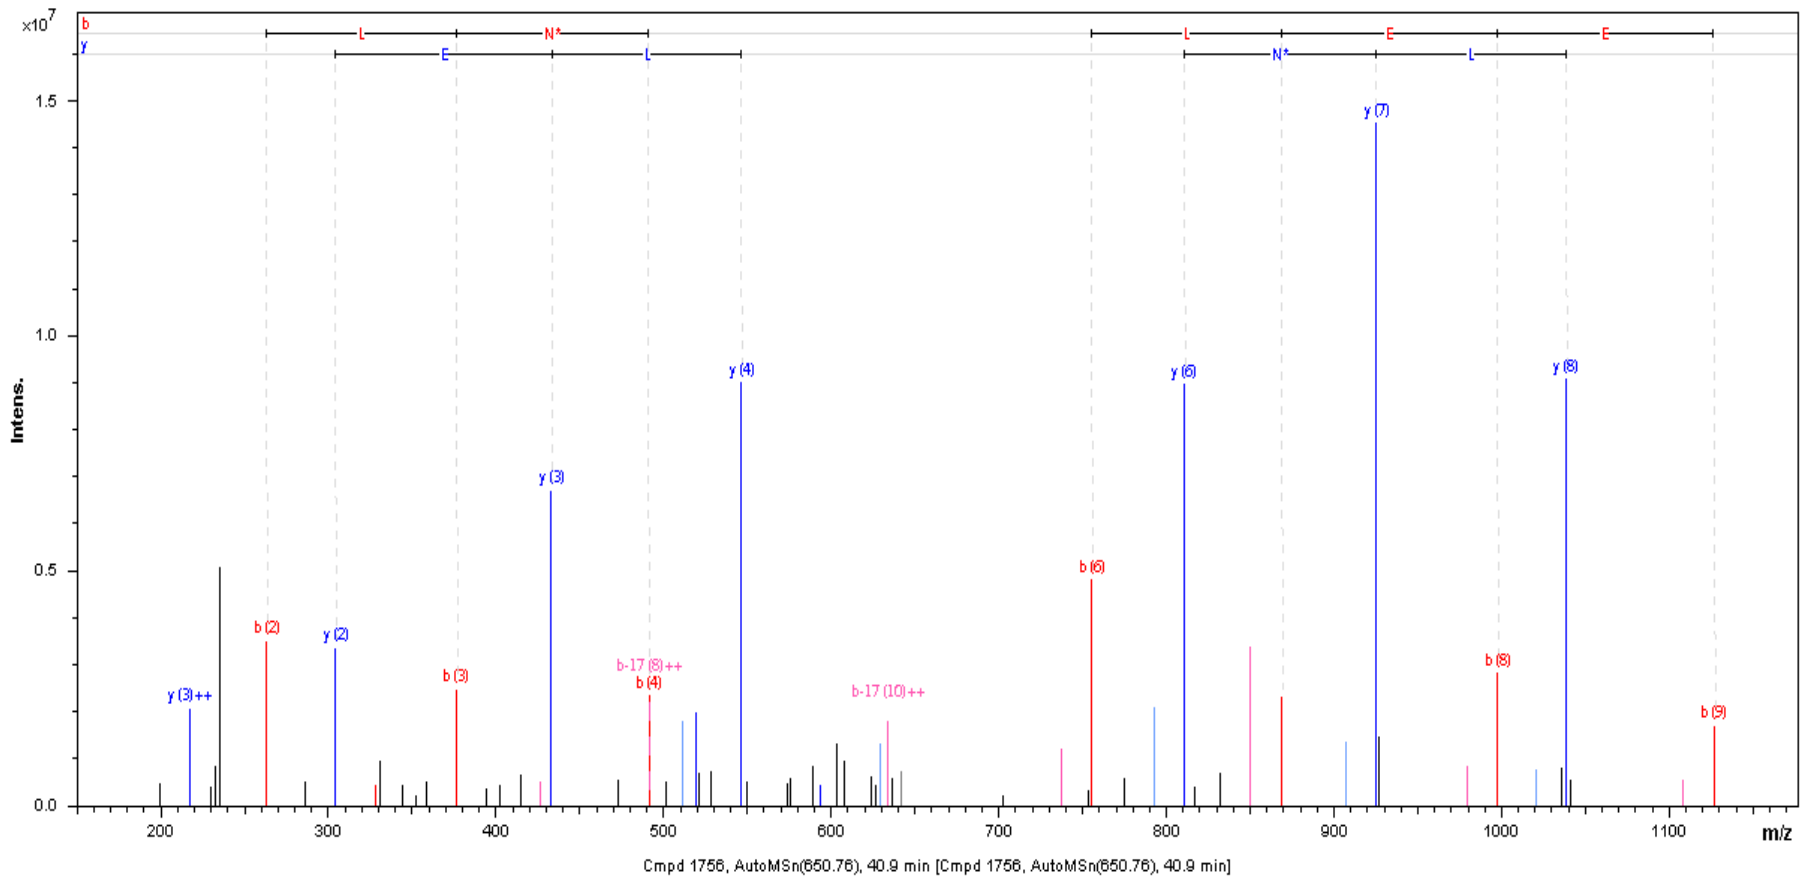

Hexokinase-1

K.SQNVSMESEVYDTPENIVHGSGSQLFDHVAECLGDFMEK.R \*

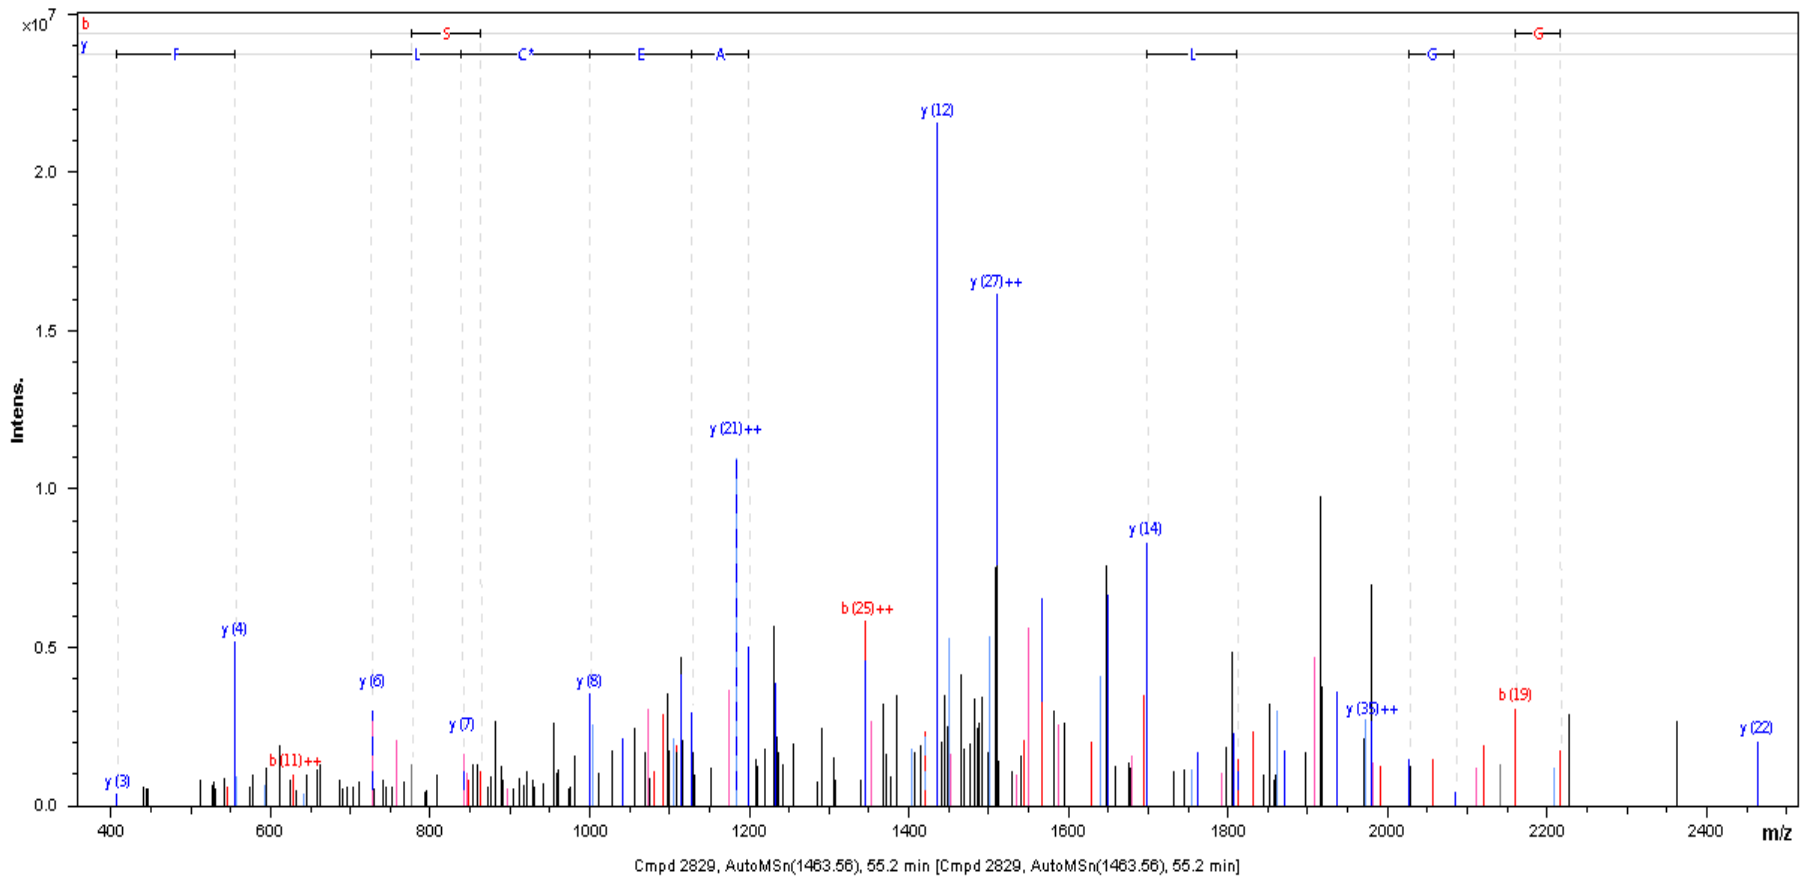

Hyaluronidase PH-20 precursor

K.VGNASDPVPIFVYIR.L

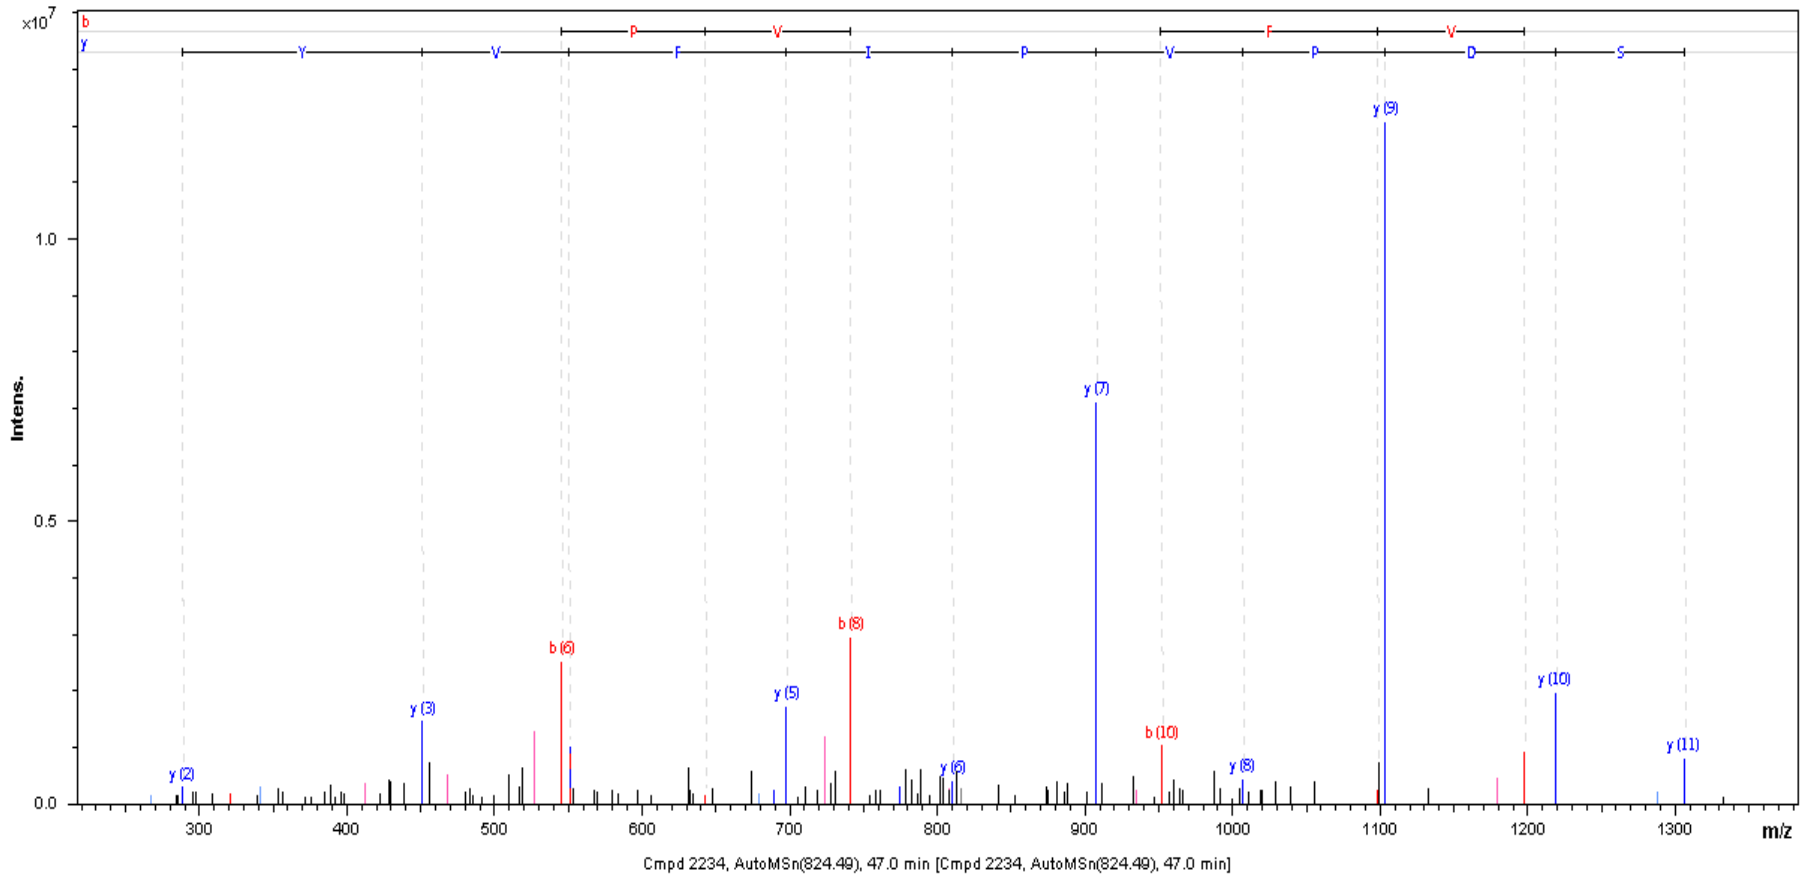

Hypoxia up-regulated protein 1

R.AEPPLNASAGDQEEK.V

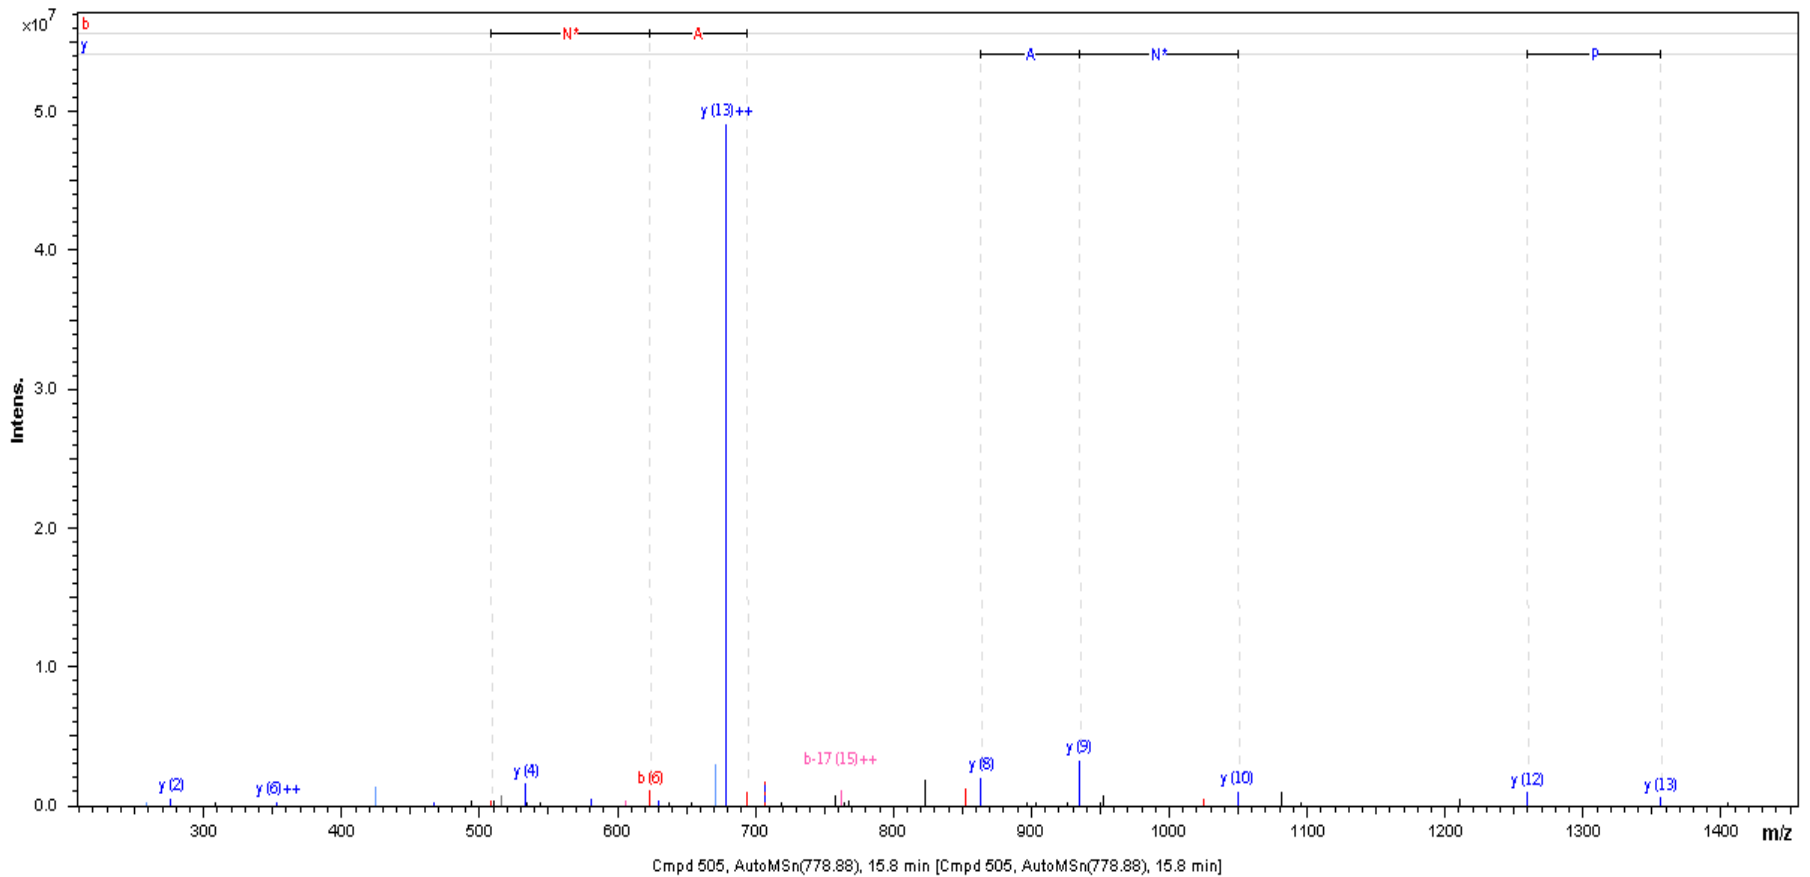

Hypoxia up-regulated protein 1

R.VFGSQNLTTVK.L

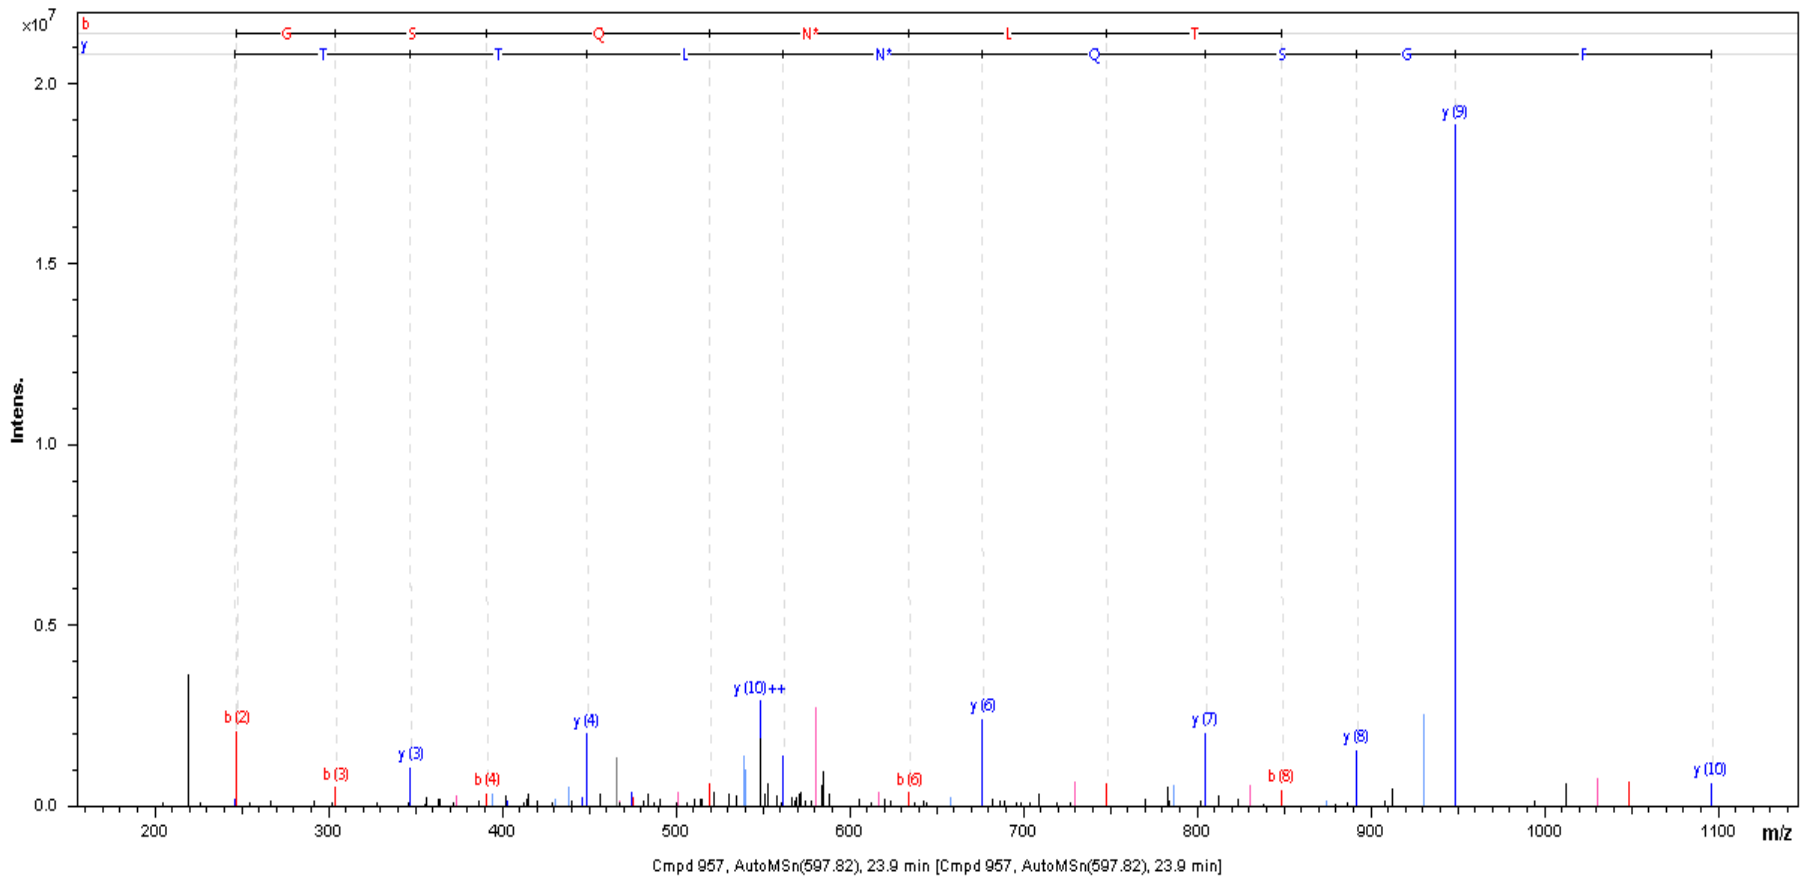



Izumo sperm-egg fusion protein 1 precursor

R.VWENSSETLIAK.G

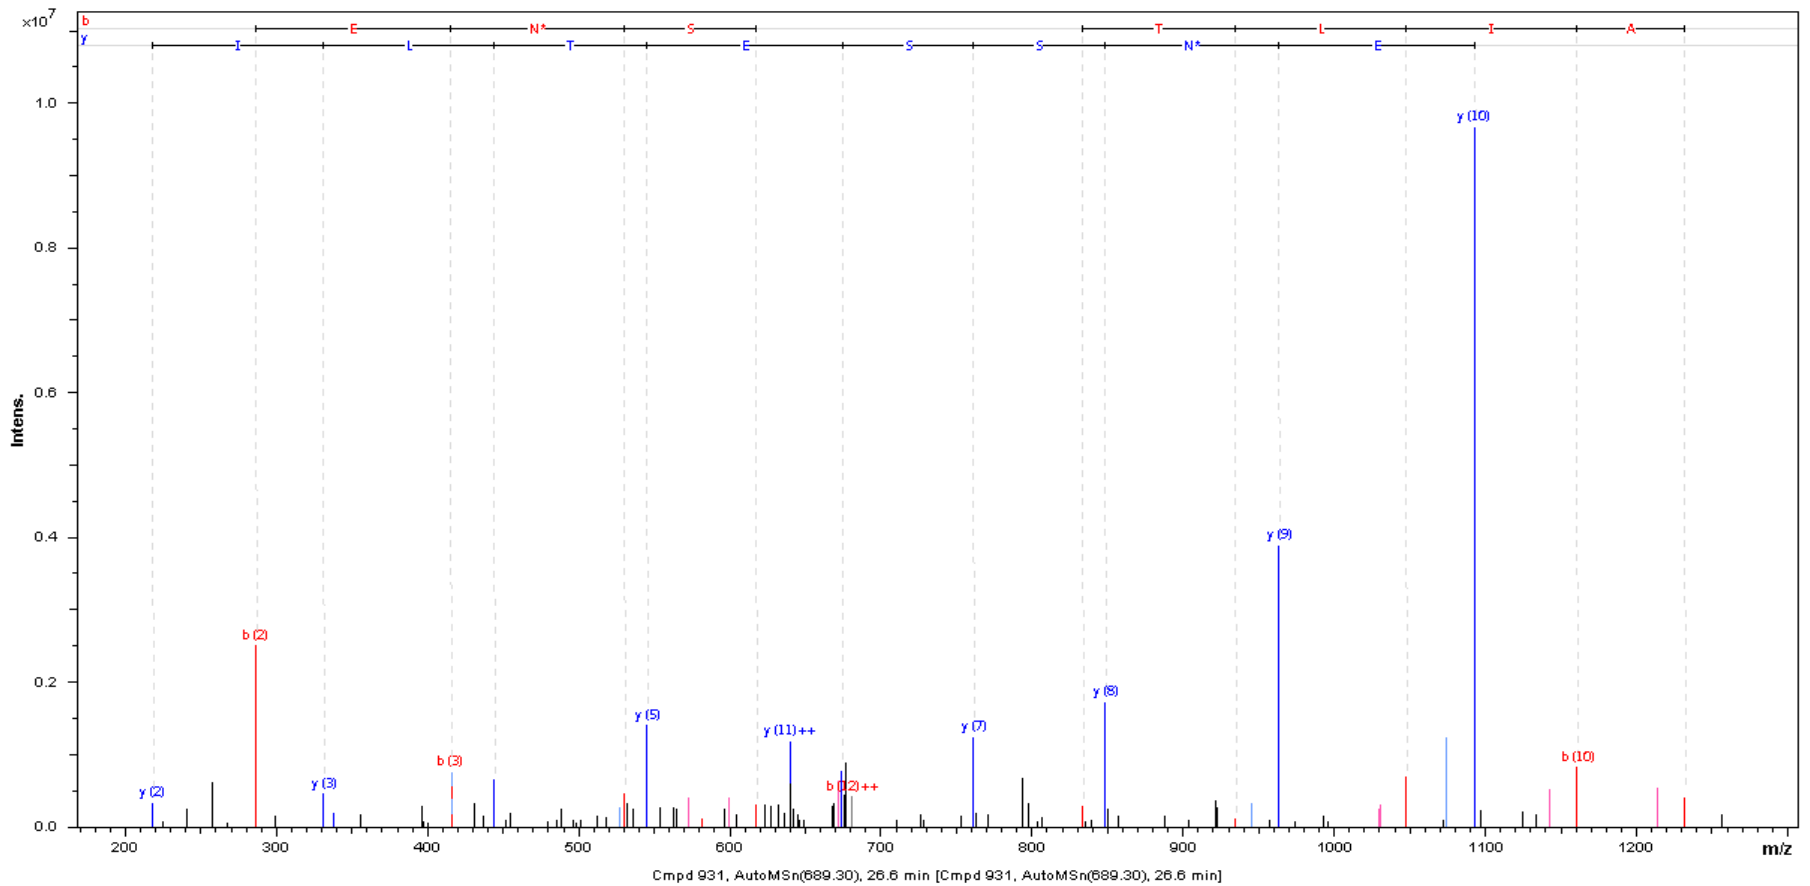

Casein kinase I isoform gamma-2

K.NQALNSTNGELNTDDPTAGHSNAPIAAPAEVEVADETK.C \*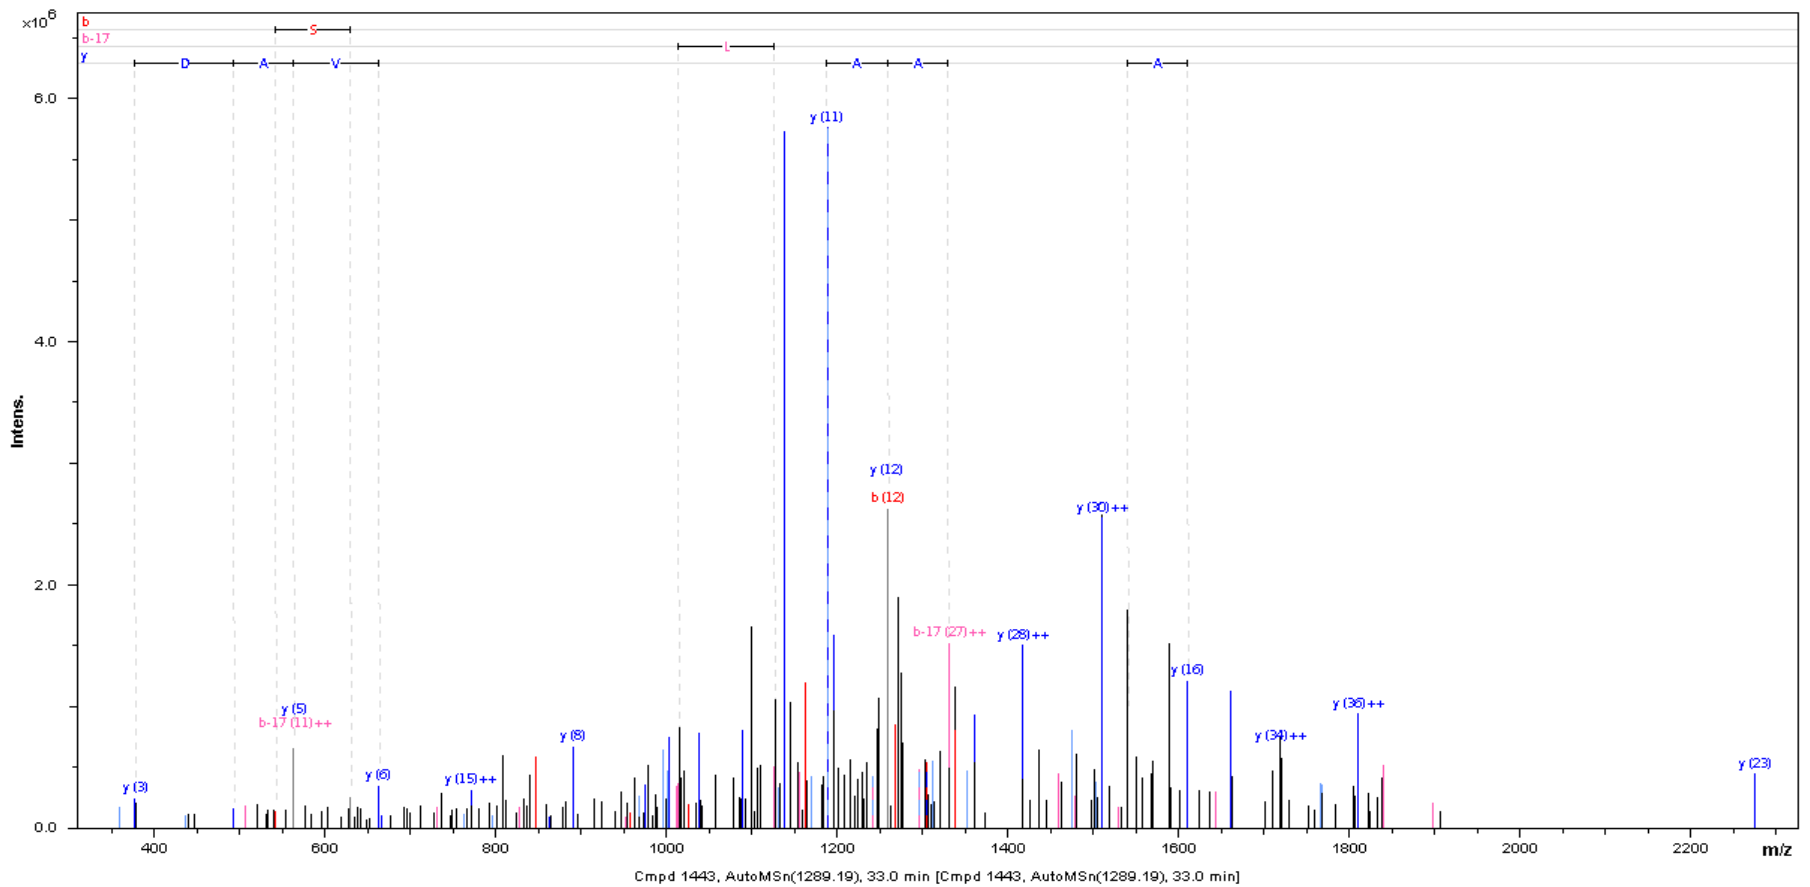

Laminin subunit alpha-1 precursor

K.LDELKNLTSQFQESVDNITK.Q \*

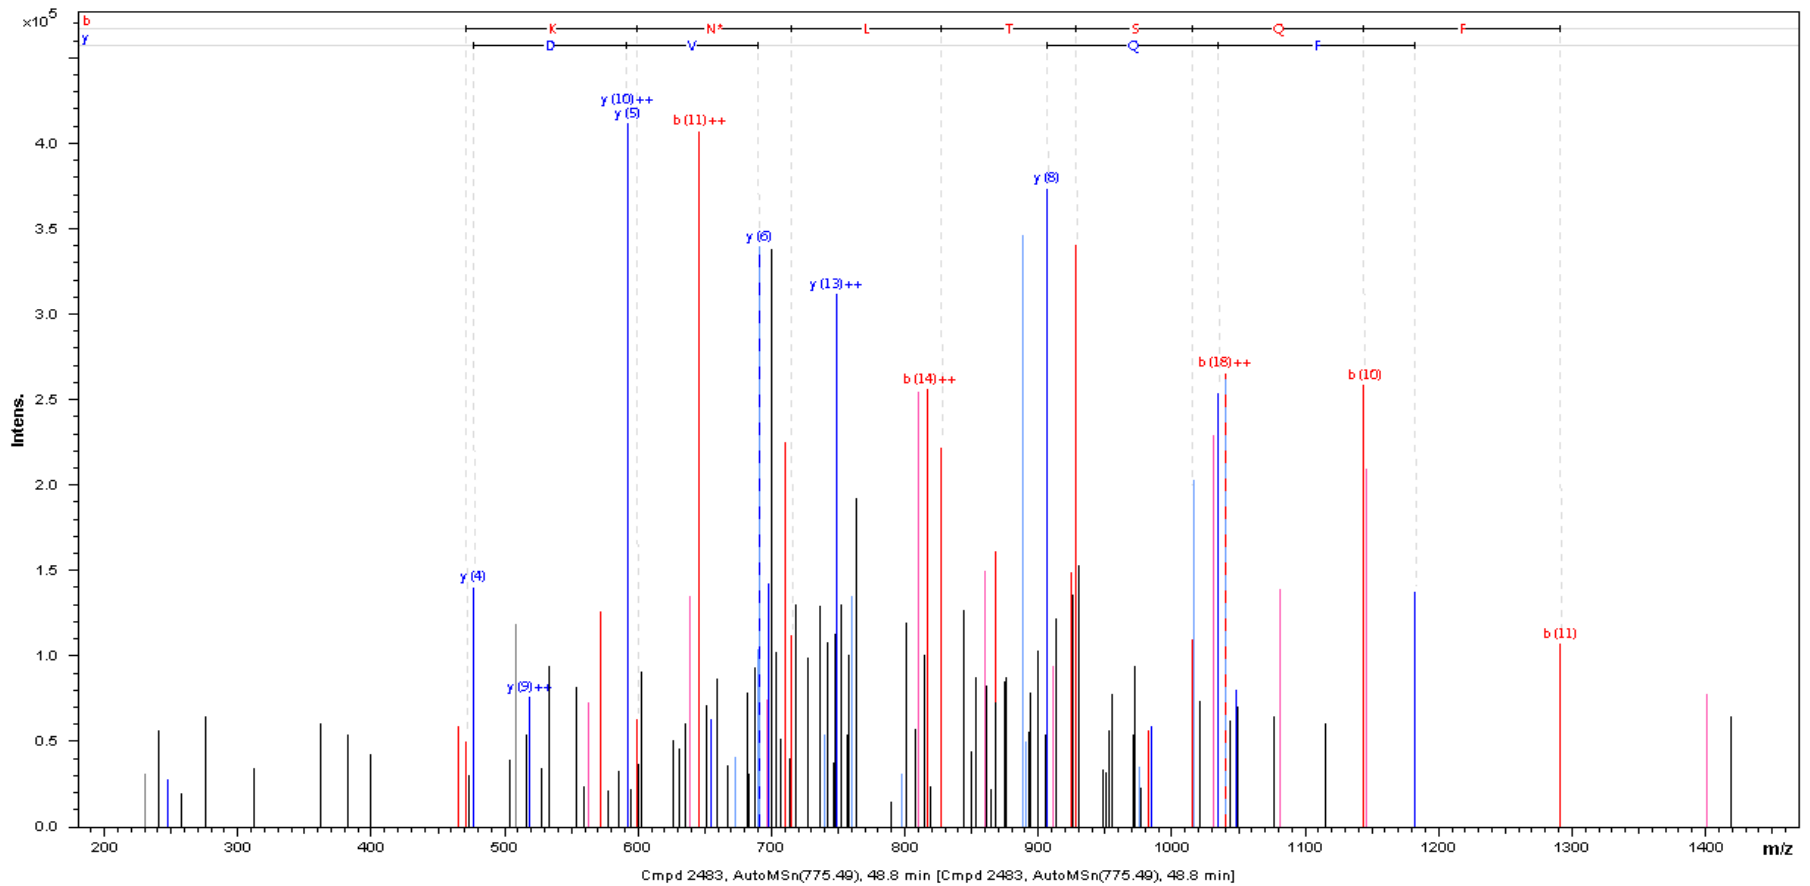

Lysosome-associated membrane glycoprotein 1 precursor

R.AFNISPNDTSSGSCGINLVTLK.\*

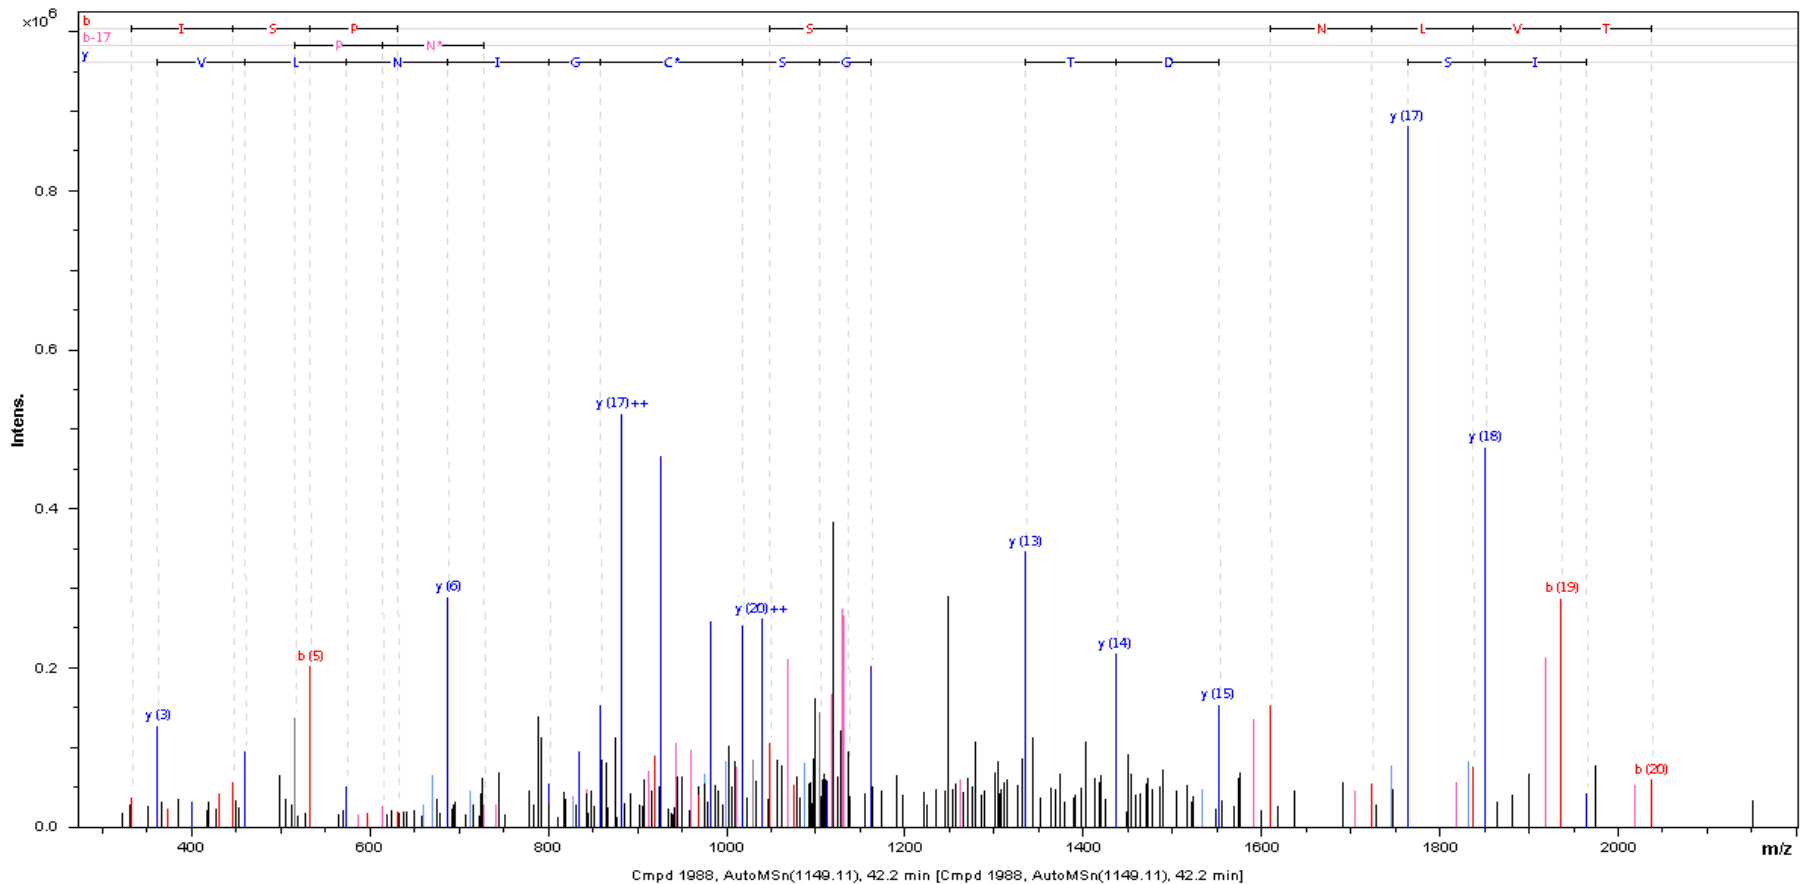

Lysosome-associated membrane glycoprotein 1 precursor

R.LNMTLPDALVPTFSISN~~HS~~LK.A \*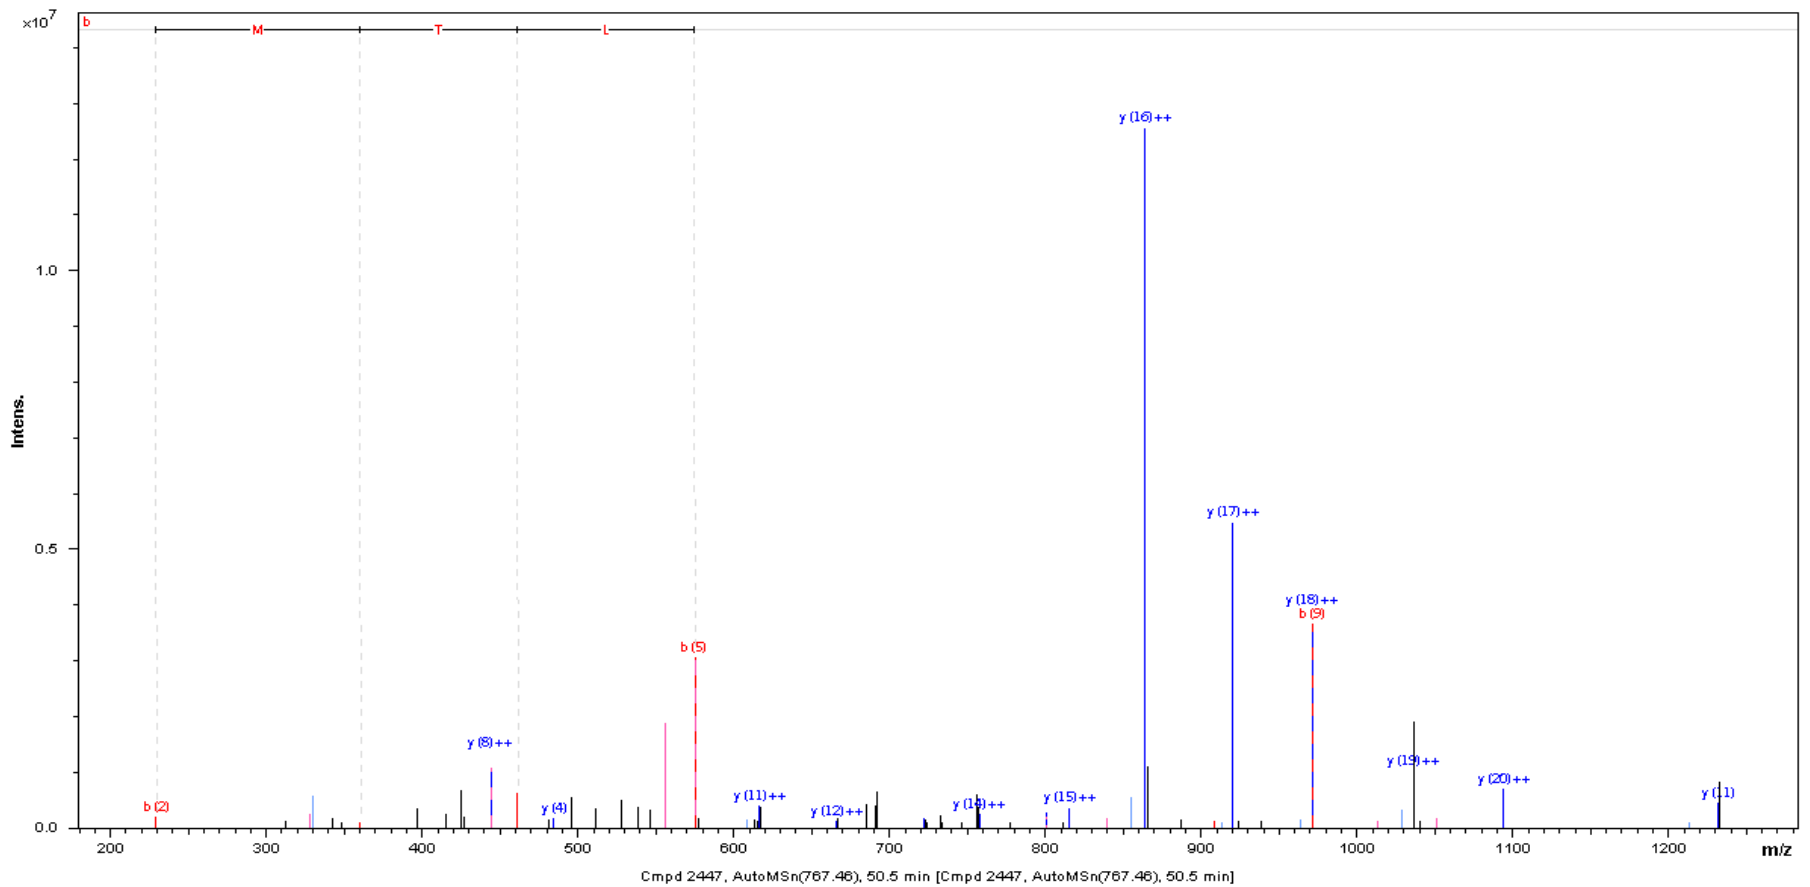

Epididymal-specific lipocalin-8 precursor

K.AVYNSSGSCVTESSLGSER.D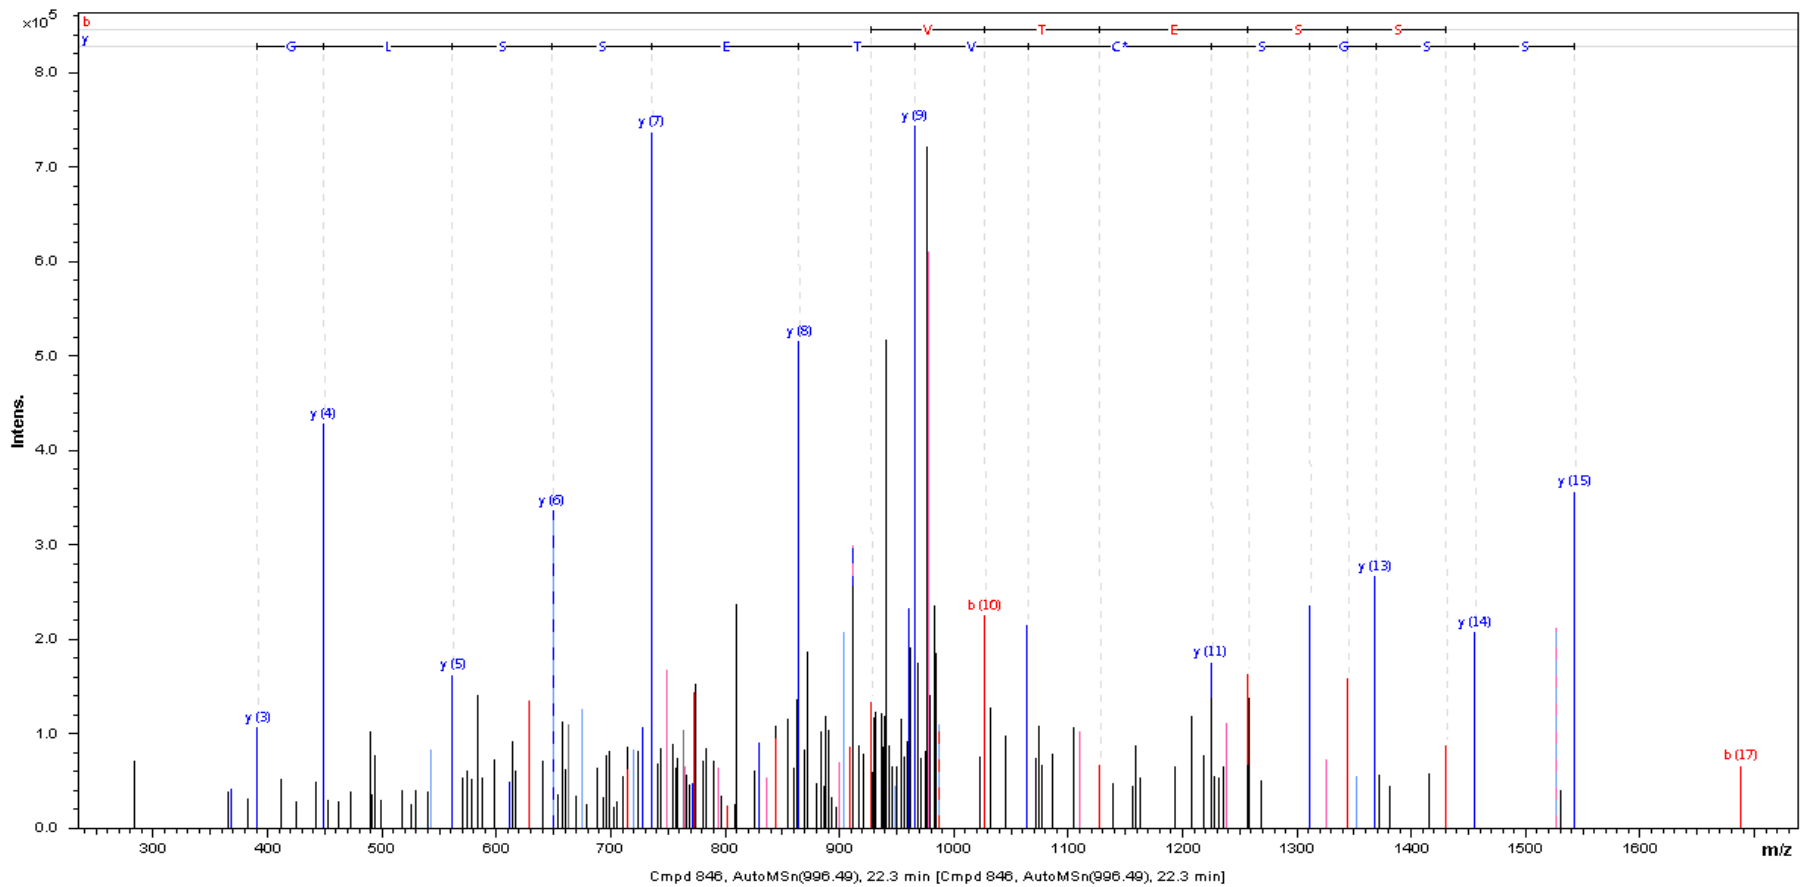

Endothelial lipase

K.DPEQEGCNLSLGDSK.L \*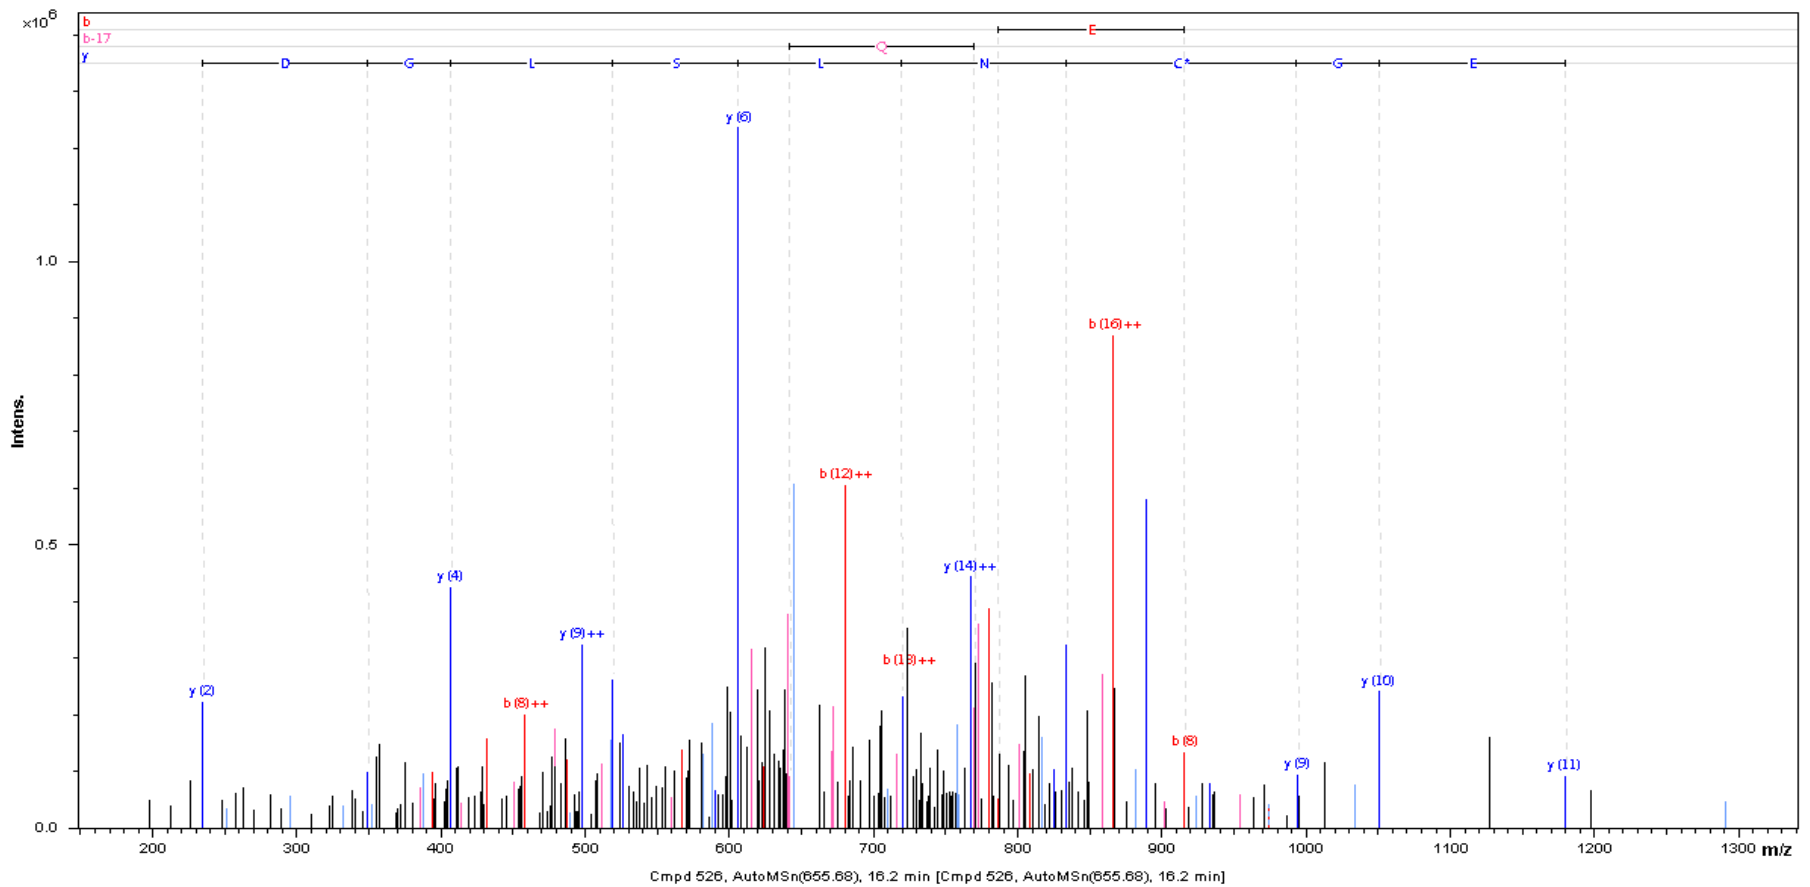

Endothelial lipase

K.IELNATNTFLVYTEEDLGDLLK.M

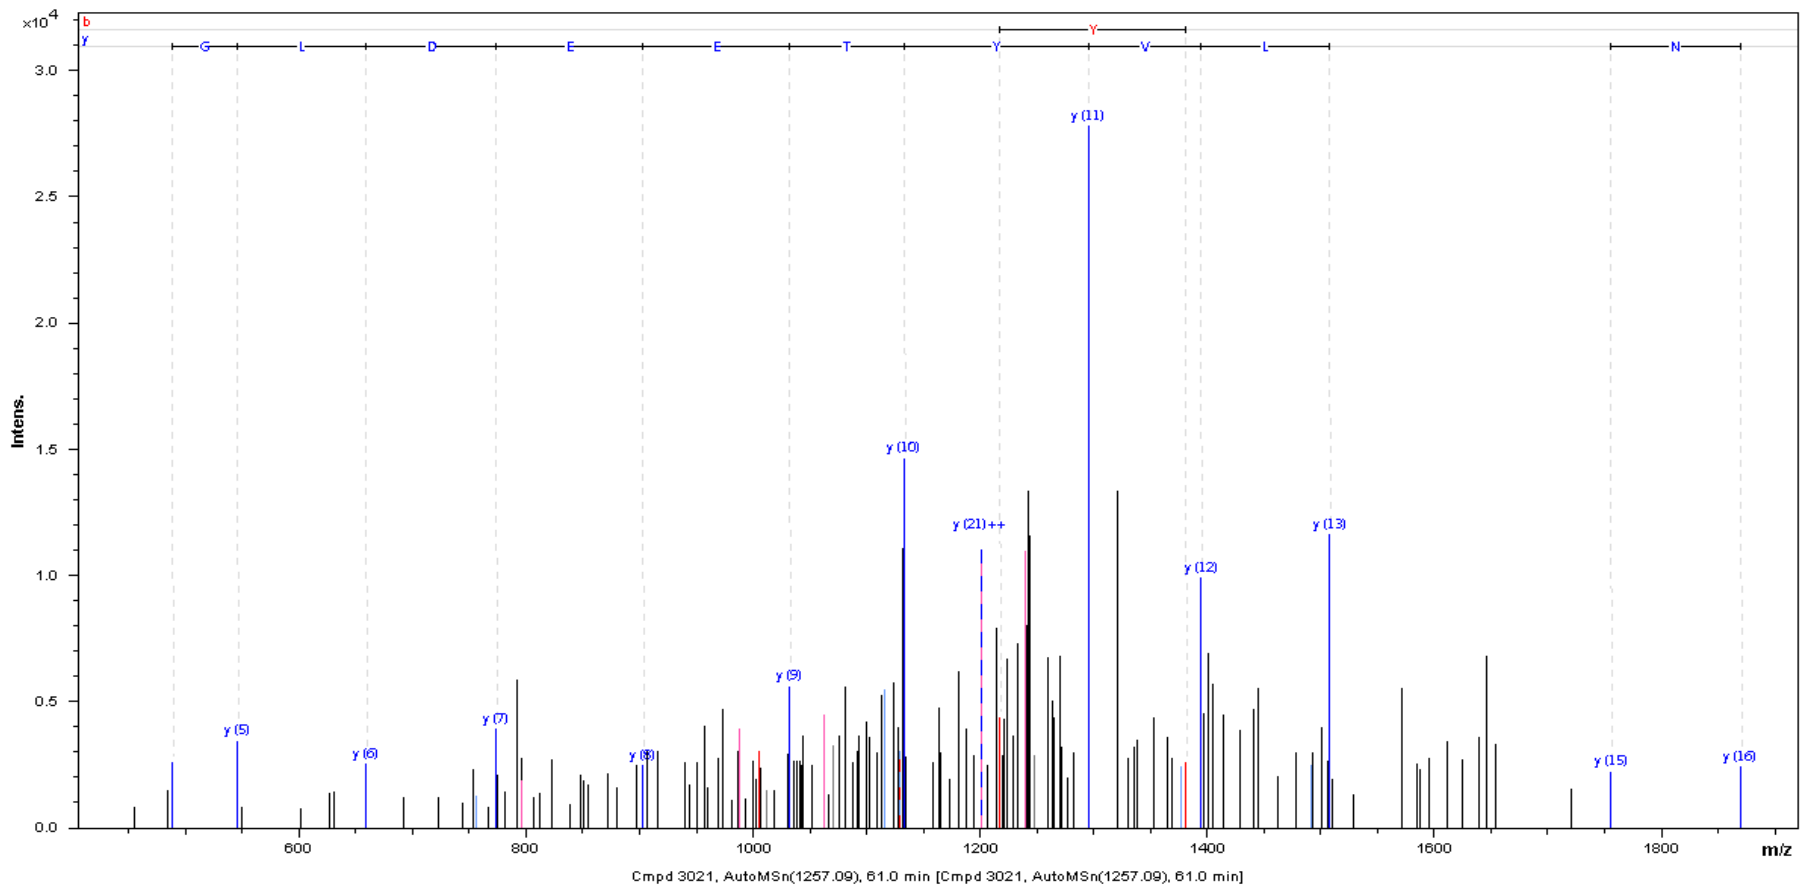



Endothelial lipase

K.LLENCGFNMTAK.T

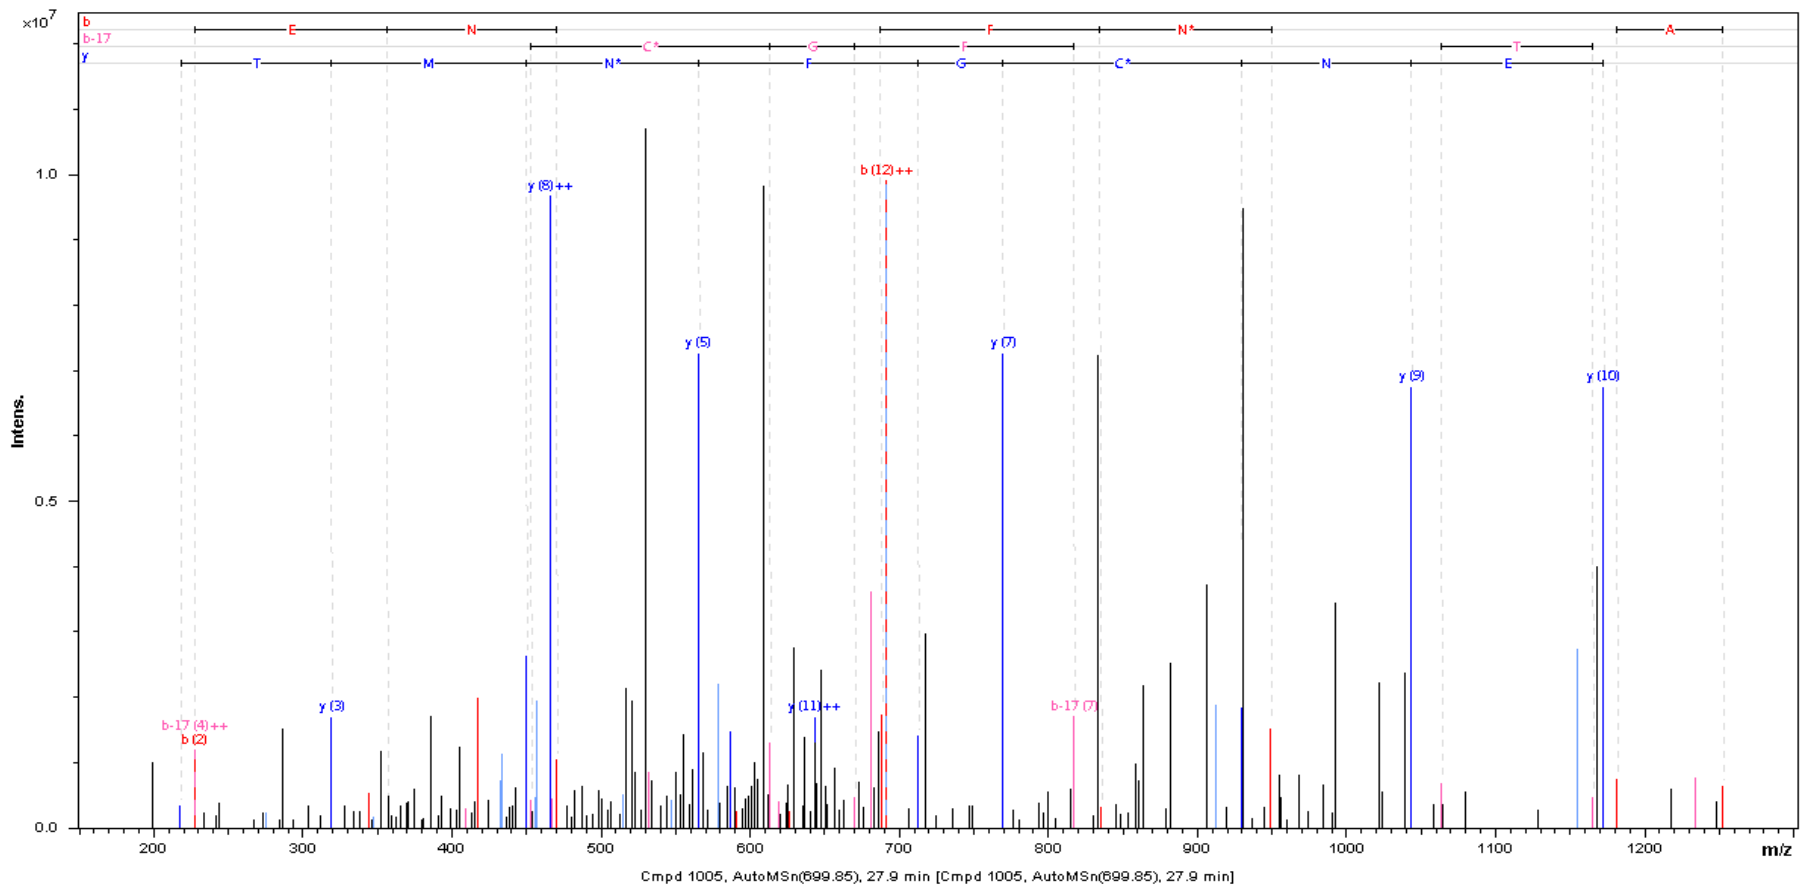

## Lipid phosphate phosphohydrolase 1

K.INCSDGYIEDYICQNEEK.V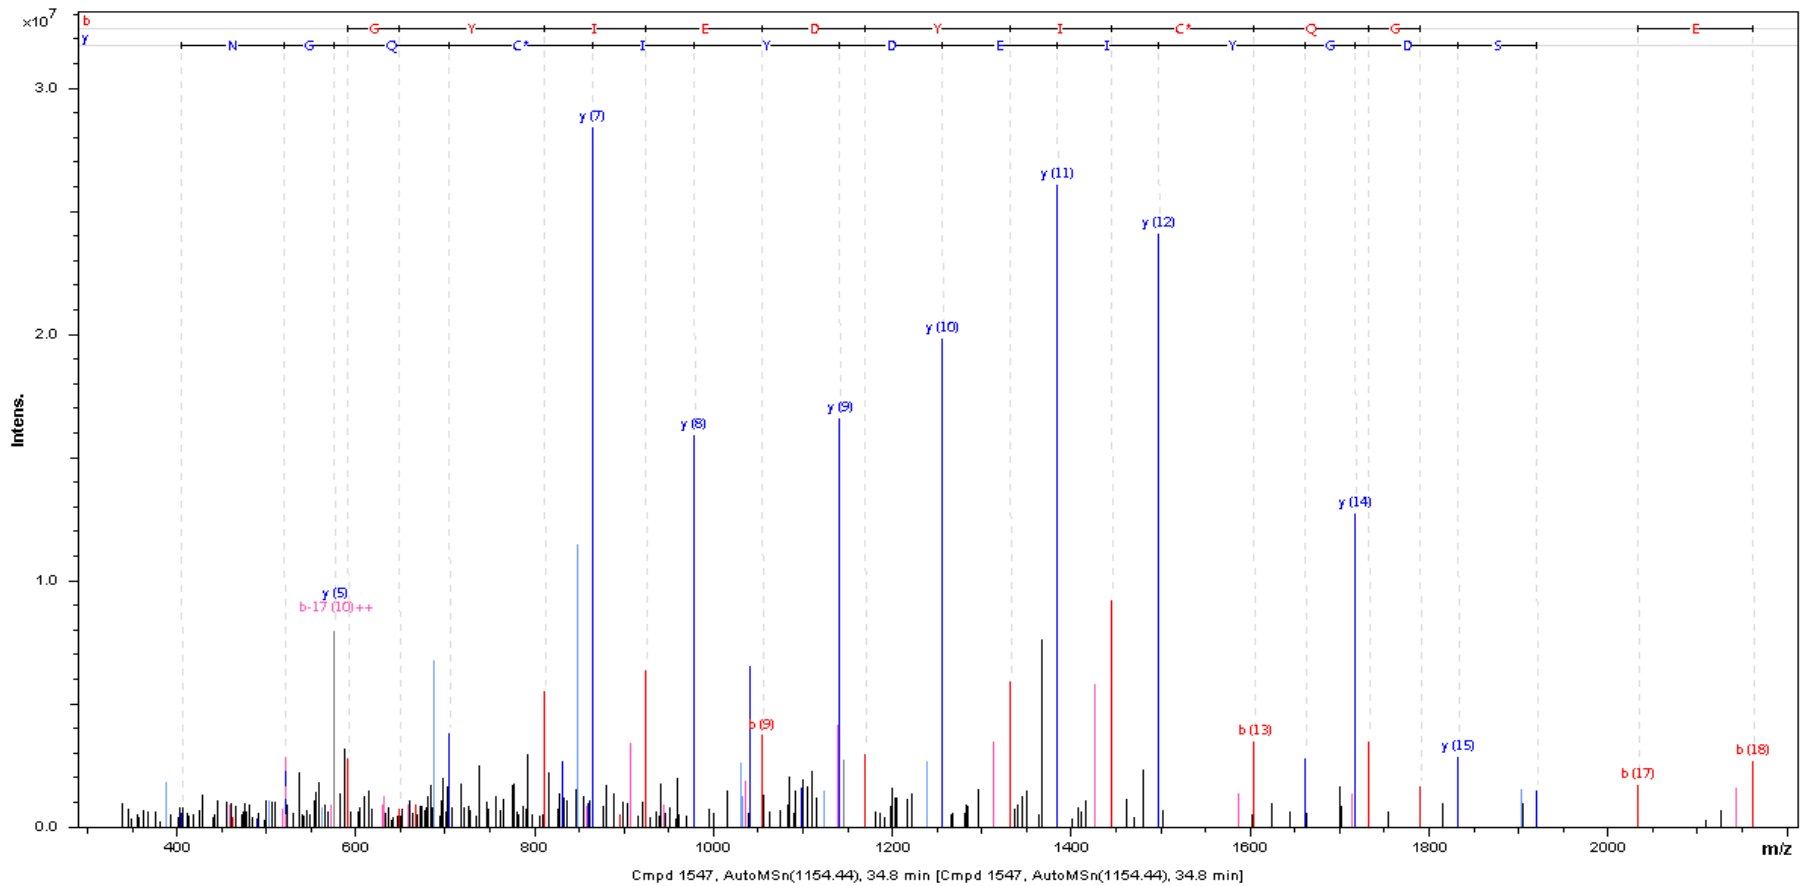

Leucine-rich repeat-containing protein 52 precursor

K.YVFANTTSLR.Y

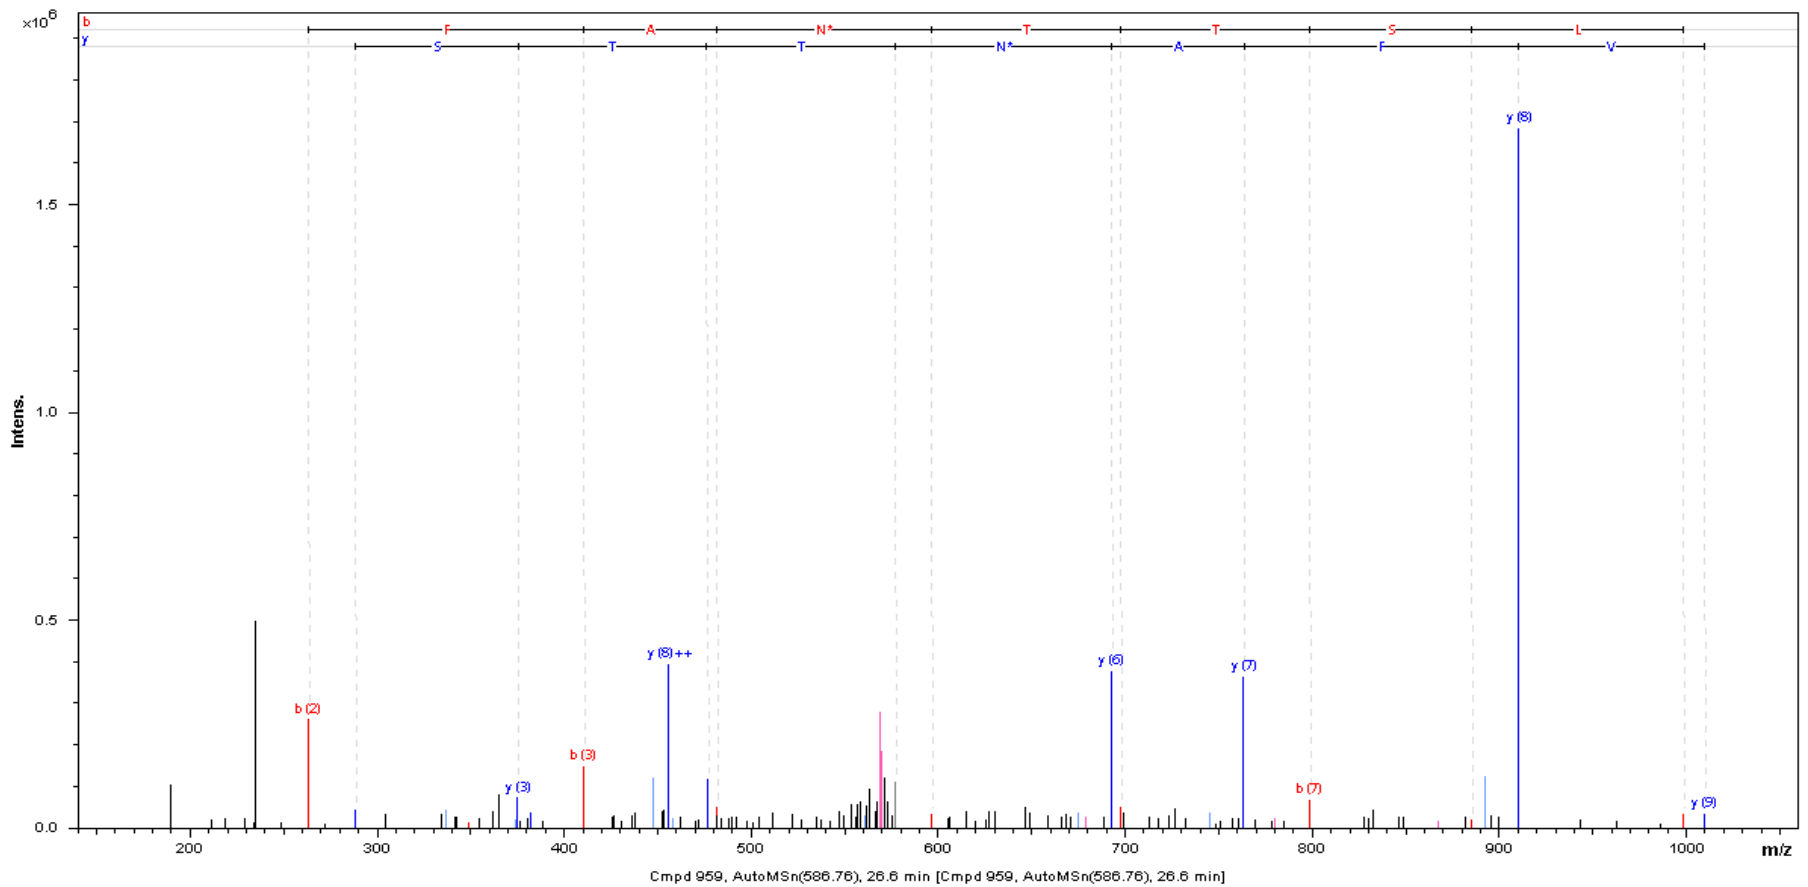

Leucine-rich repeat-containing protein 52 precursor

R.LNISHNPHLLYLDK.Y

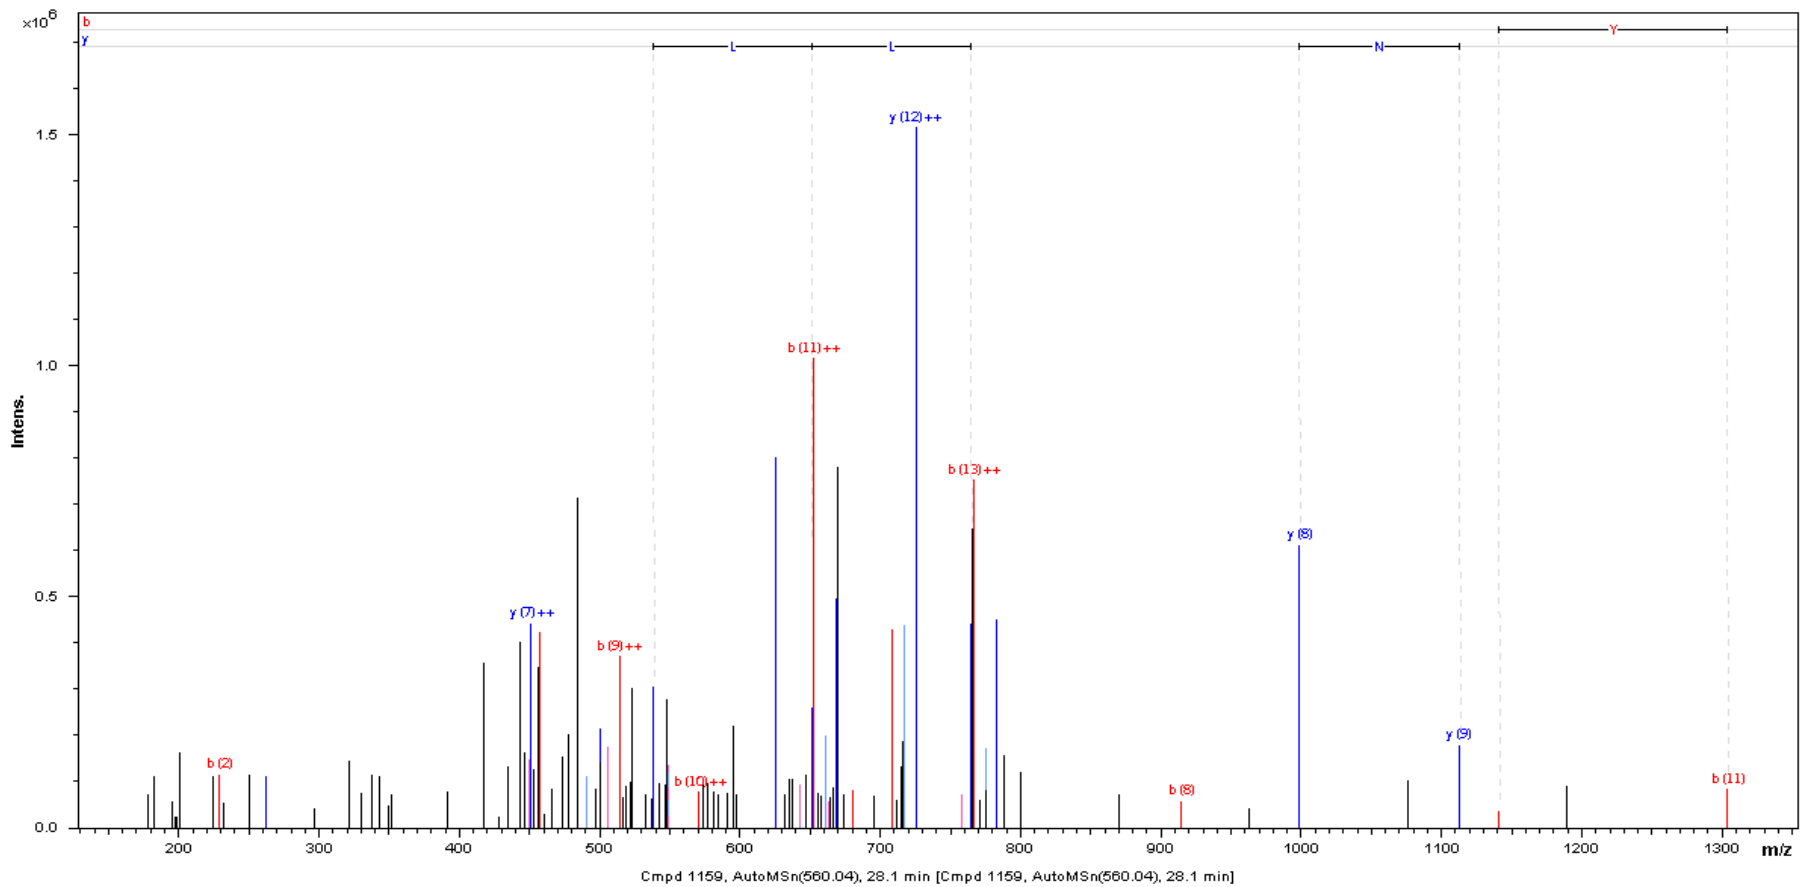

Ly6/PLAUR domain-containing protein 4 precursor

K.FQAGNLNTTFLIMGCAR.D

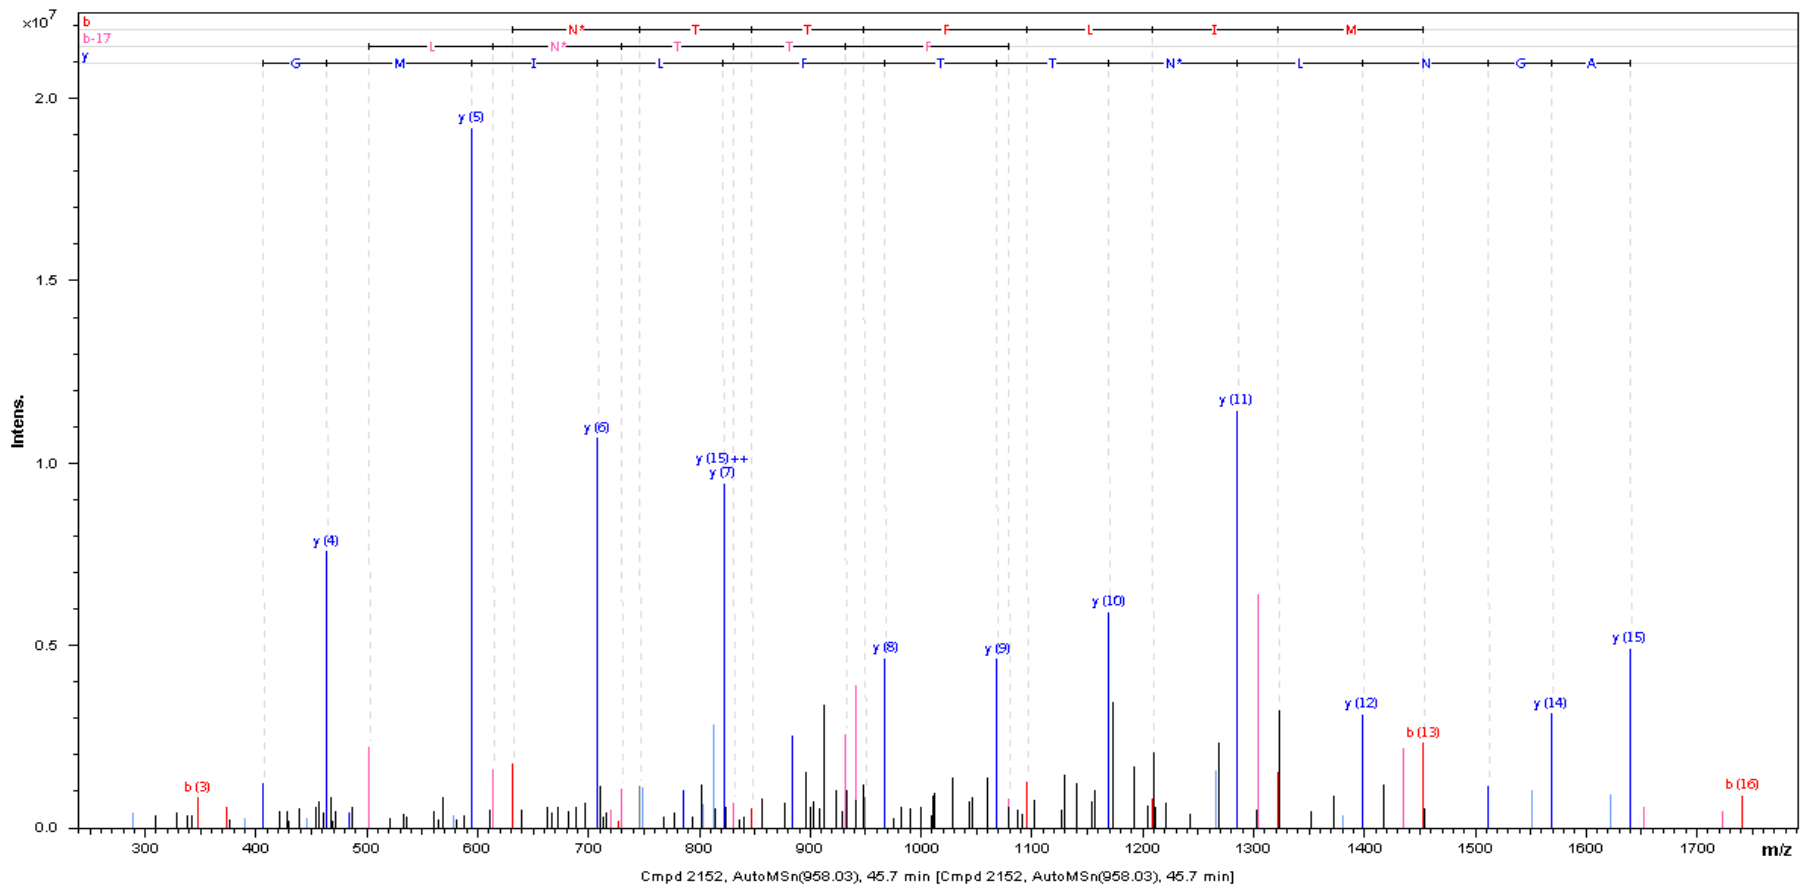

Ly6/PLAUR domain-containing protein 4 precursor

R.SYLCNNLTNLEPFVR.L \*

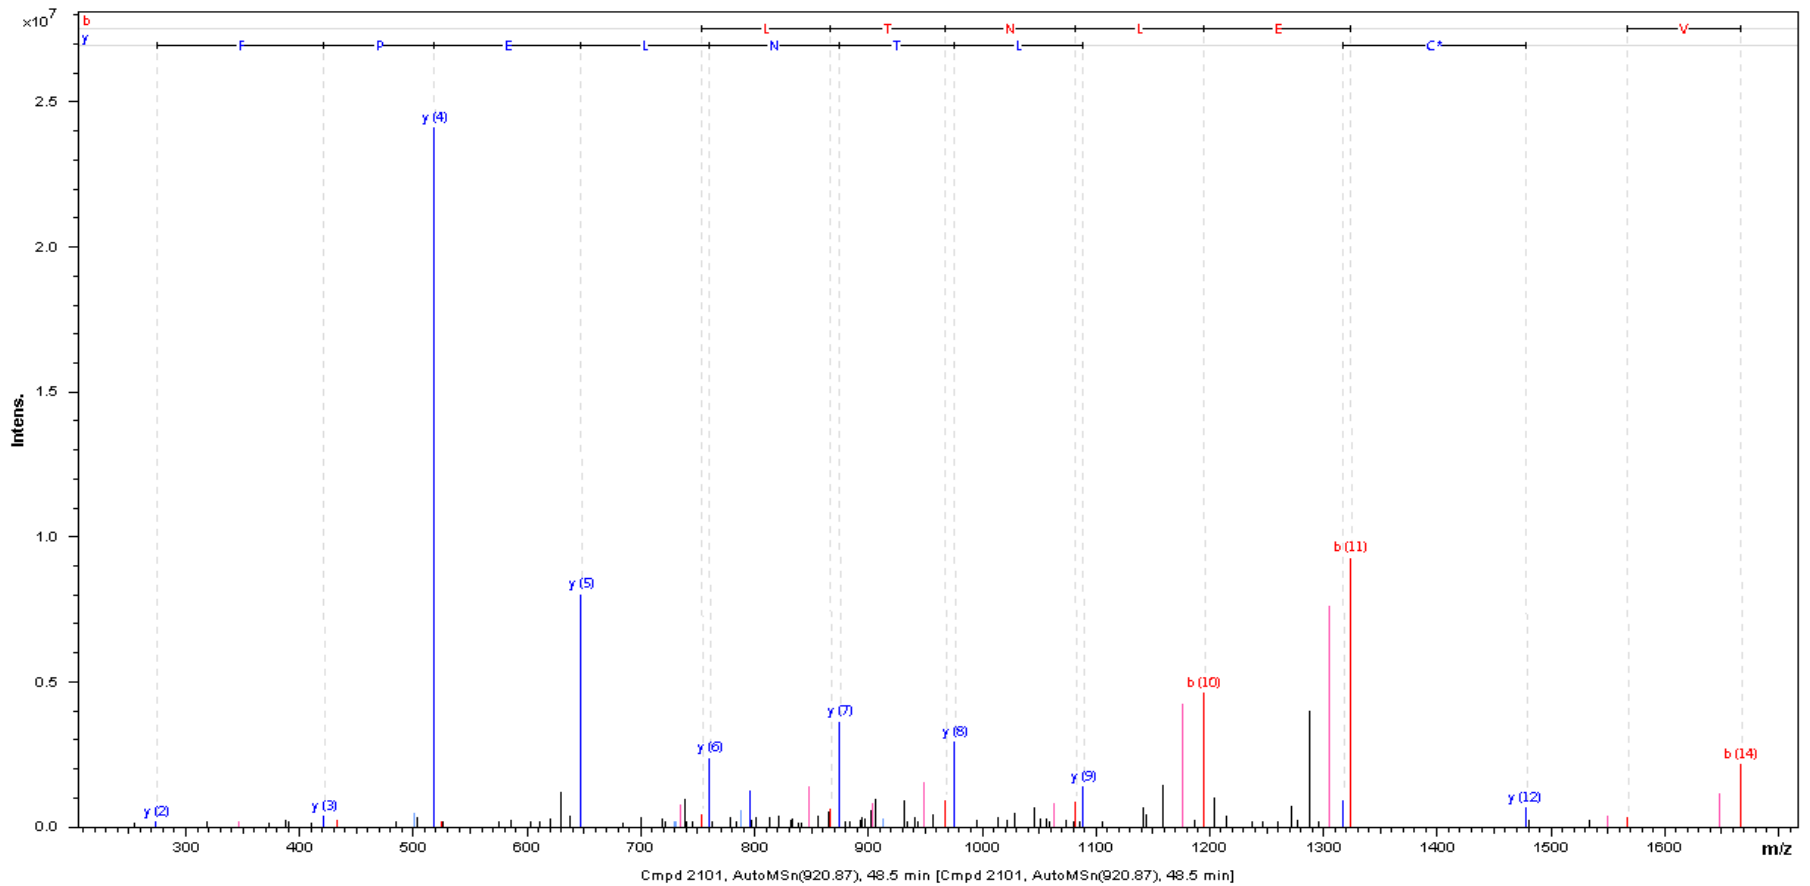

Lysosomal alpha-mannosidase

R.DDYRPTWTLNQTEPVAGNYYPVNTR.I \*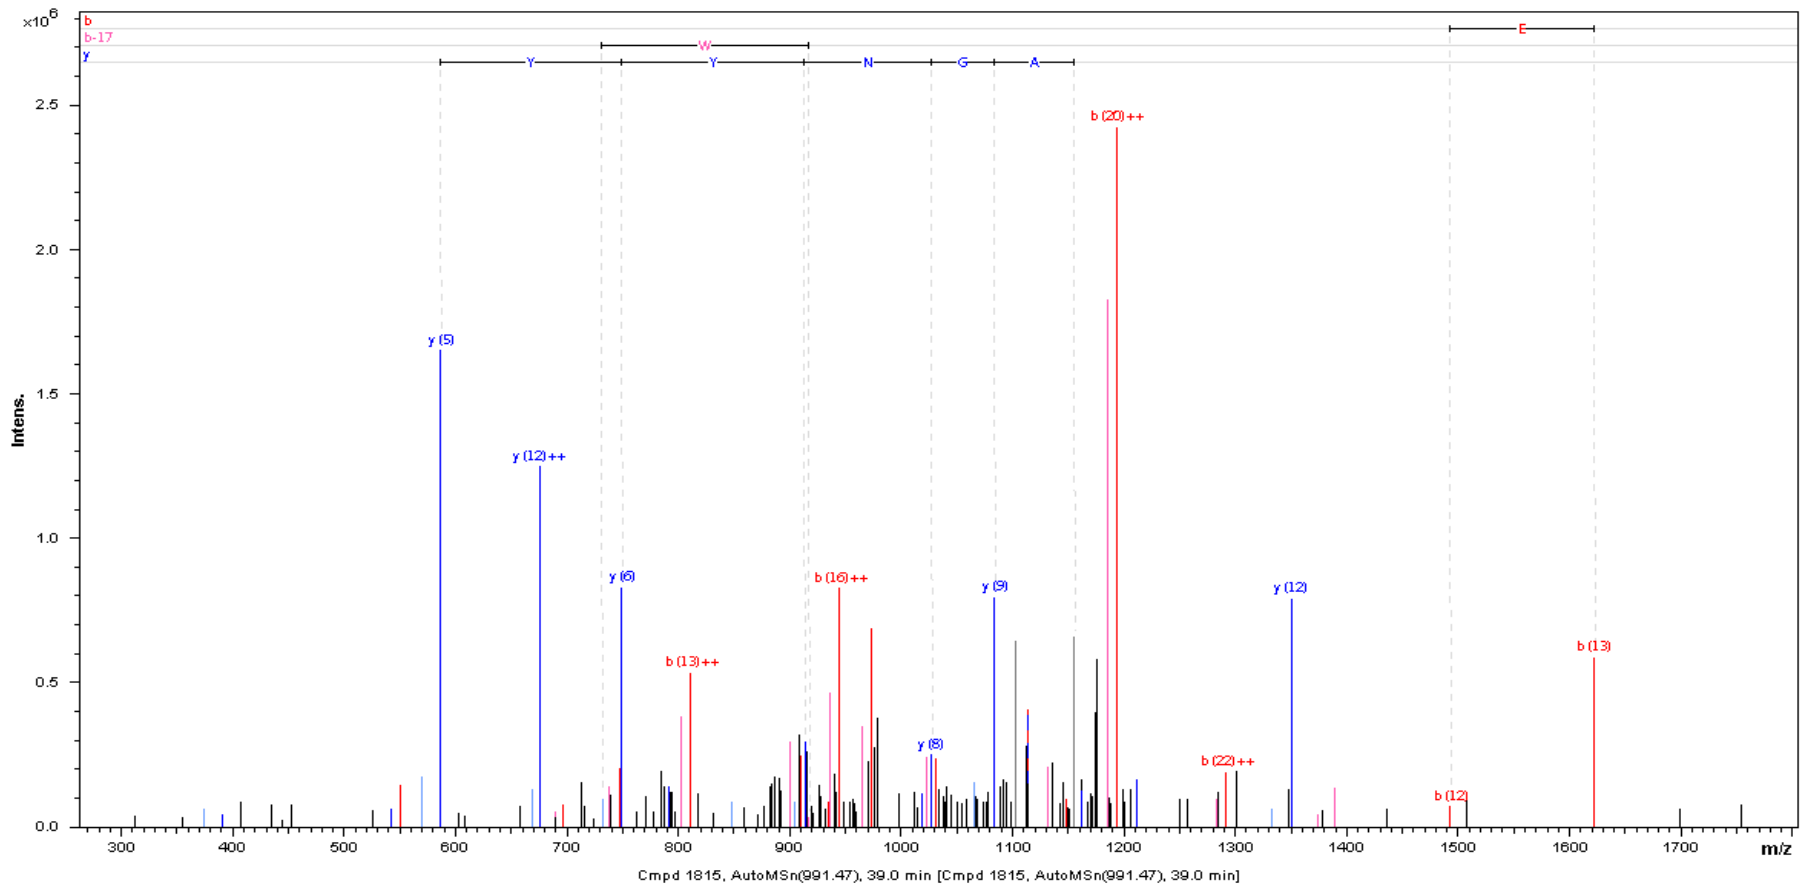

Epididymis-specific alpha-mannosidase precursor

K.QFFNASVQFDNMDPLLDYINQR.T \*

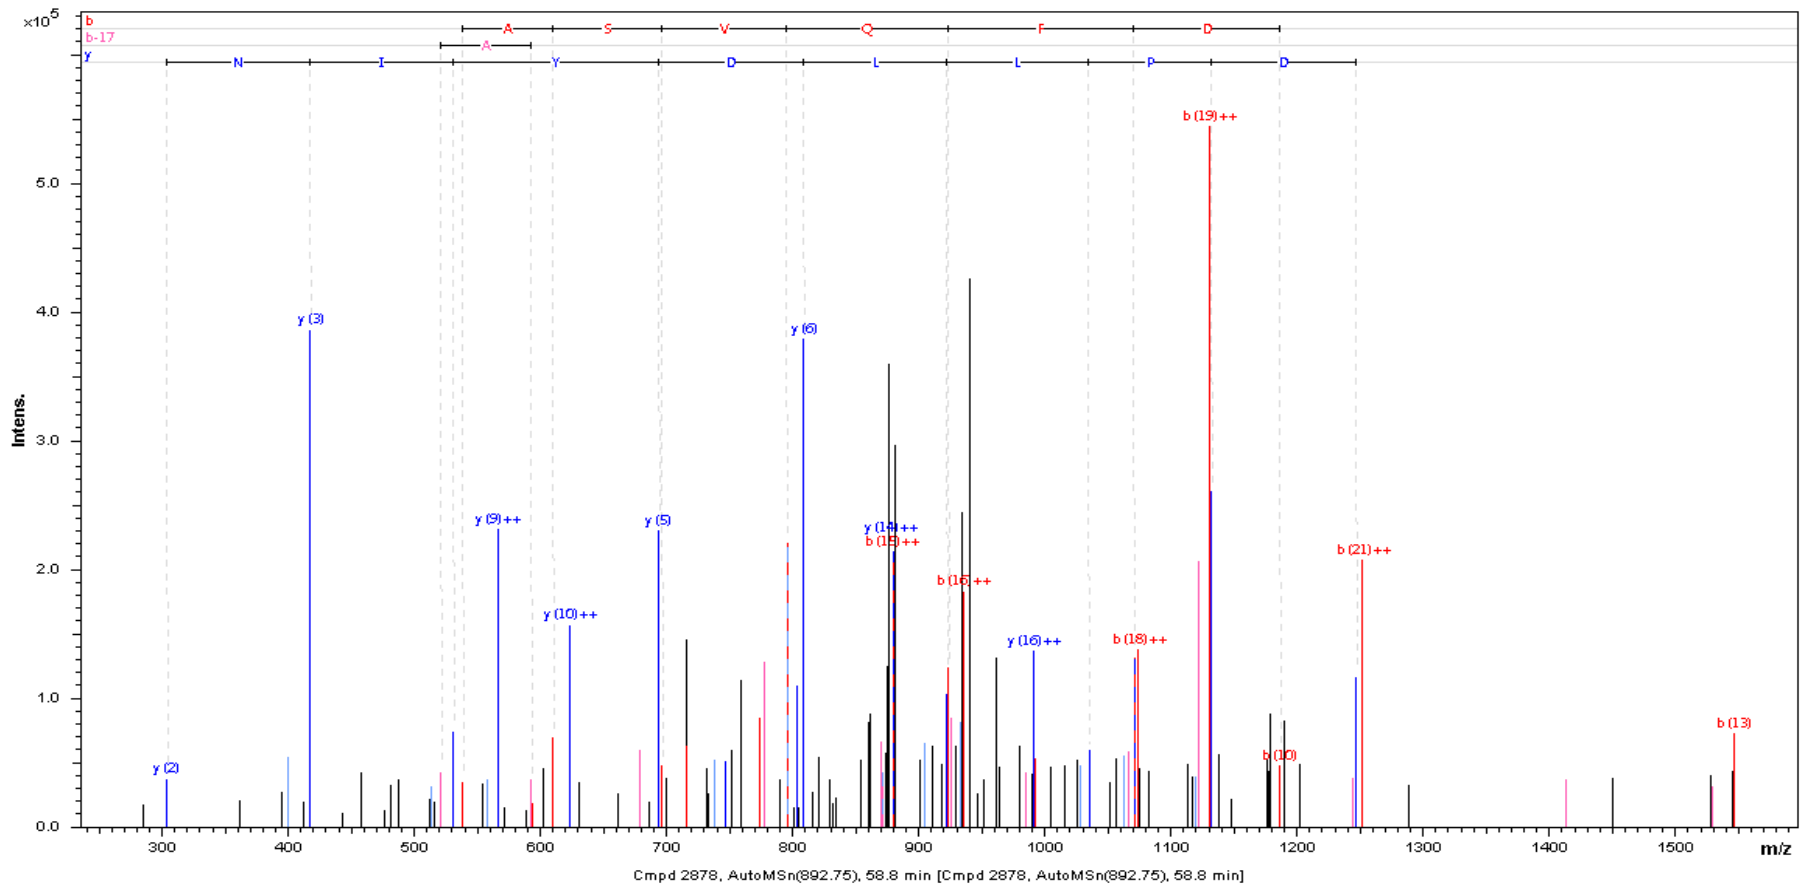



Epididymis-specific alpha-mannosidase precursor

K.YNLTLNDTSIVHPVLWLMLGPK.S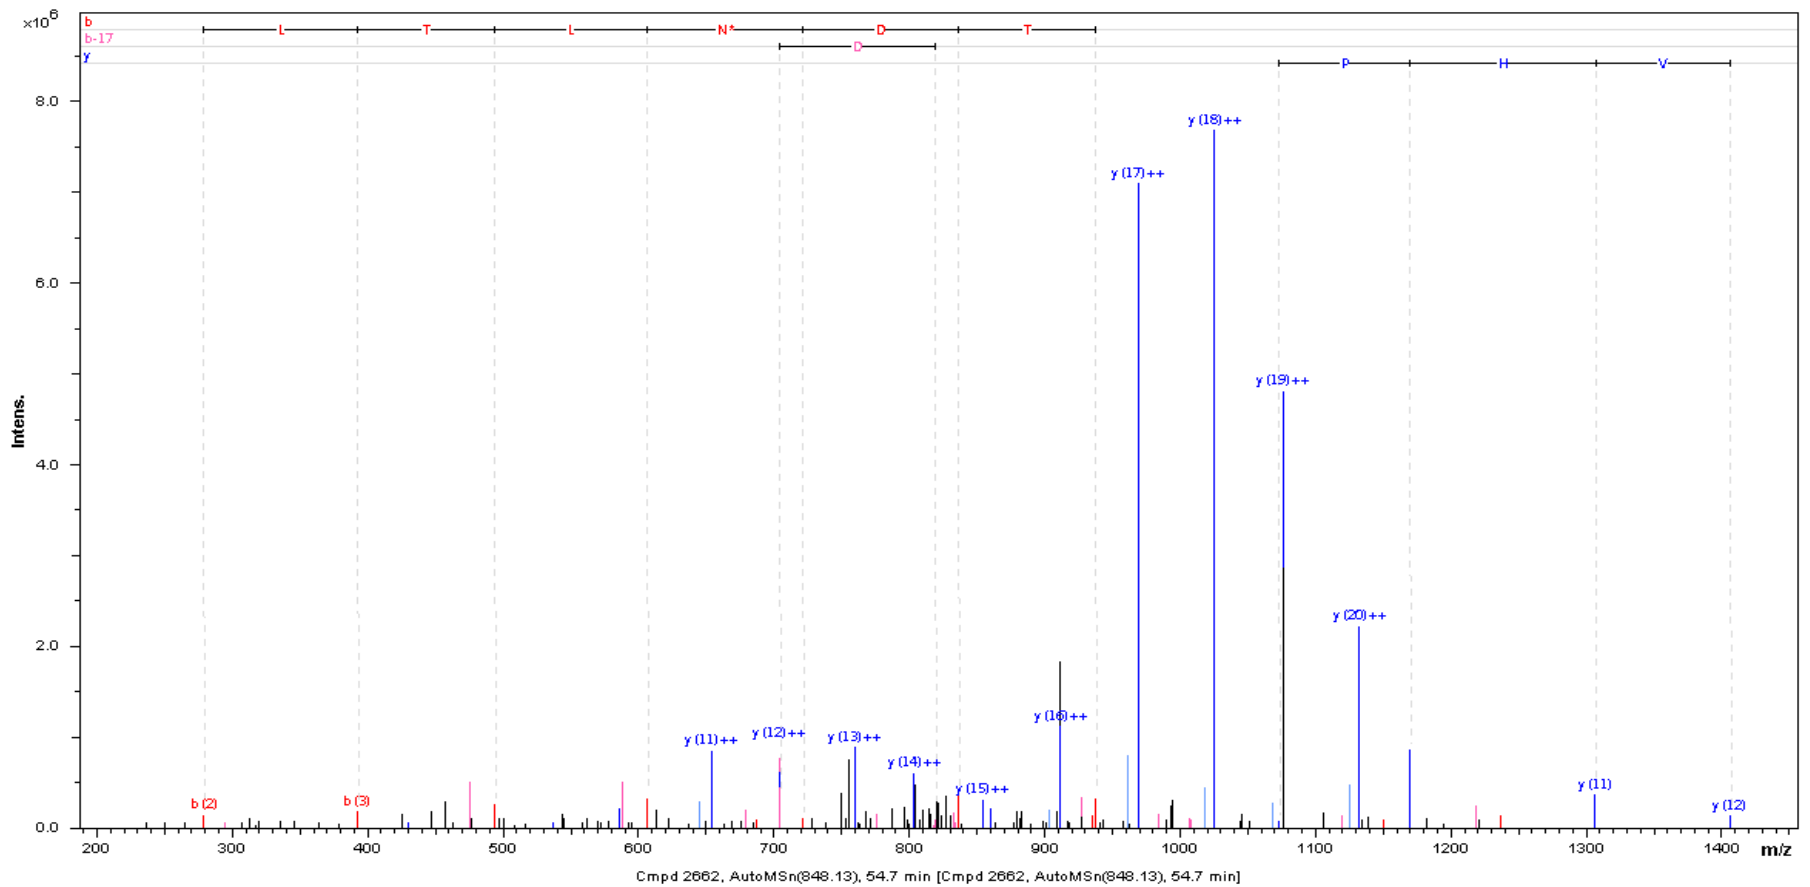

Membrane cofactor protein precursor

K.NGTHTLTDINVK.Y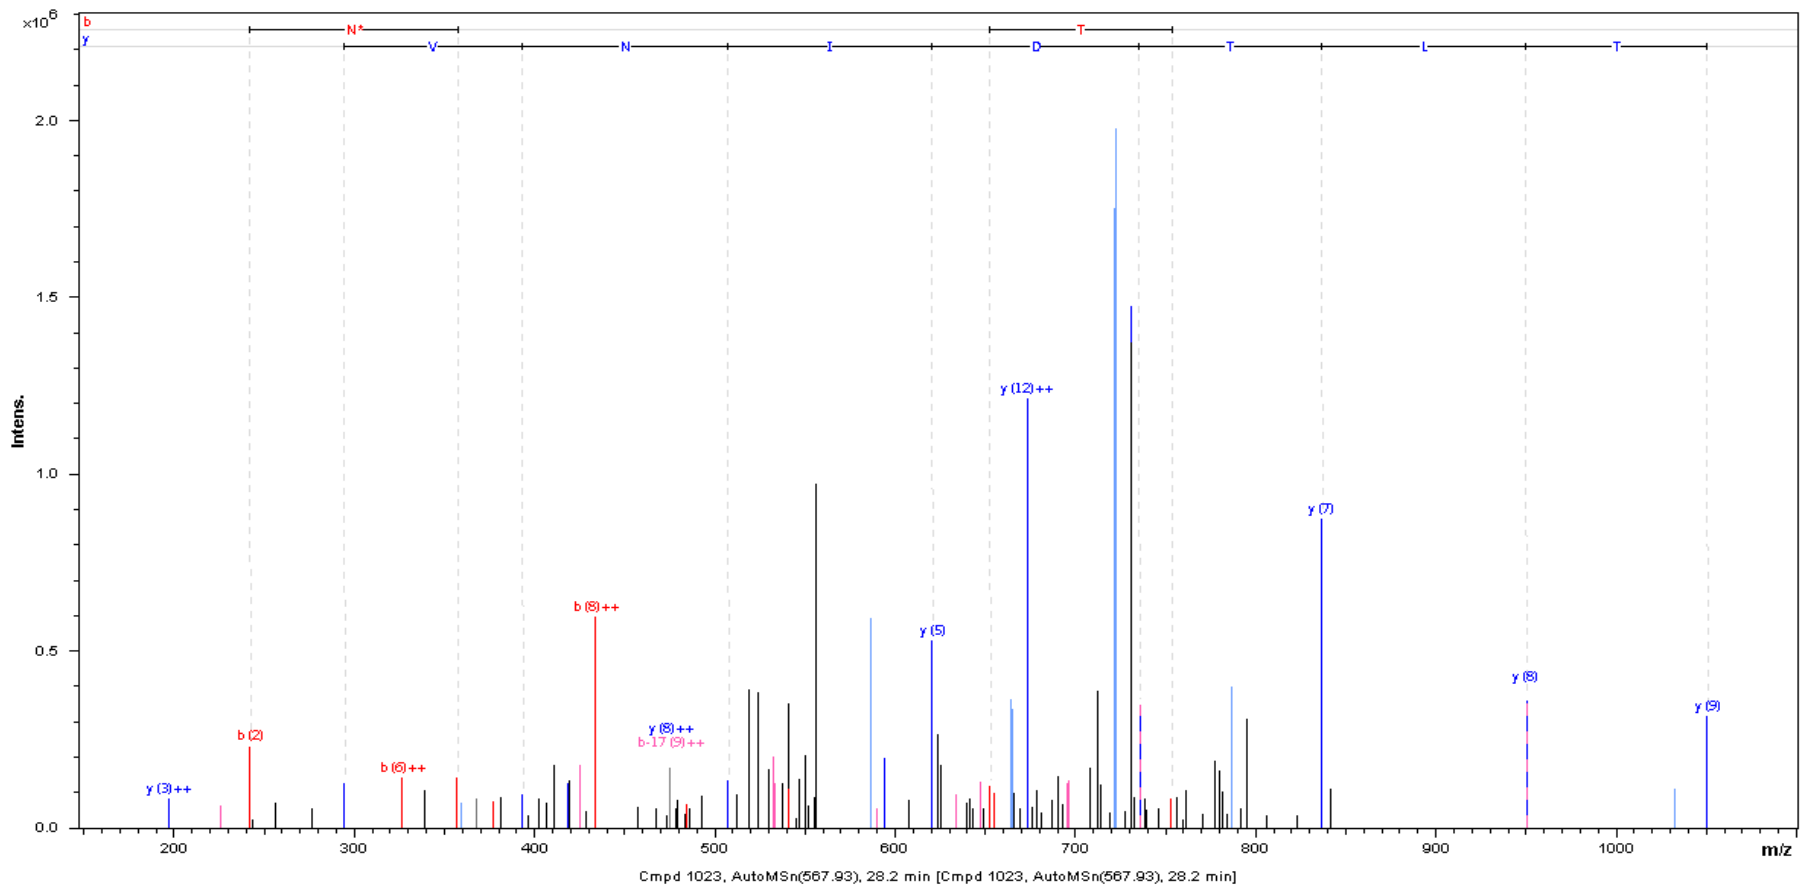

Mitochondria-eating protein

R.DNSPDQDQHQSDNESFSETQPTQVQDDLAESGK.S \*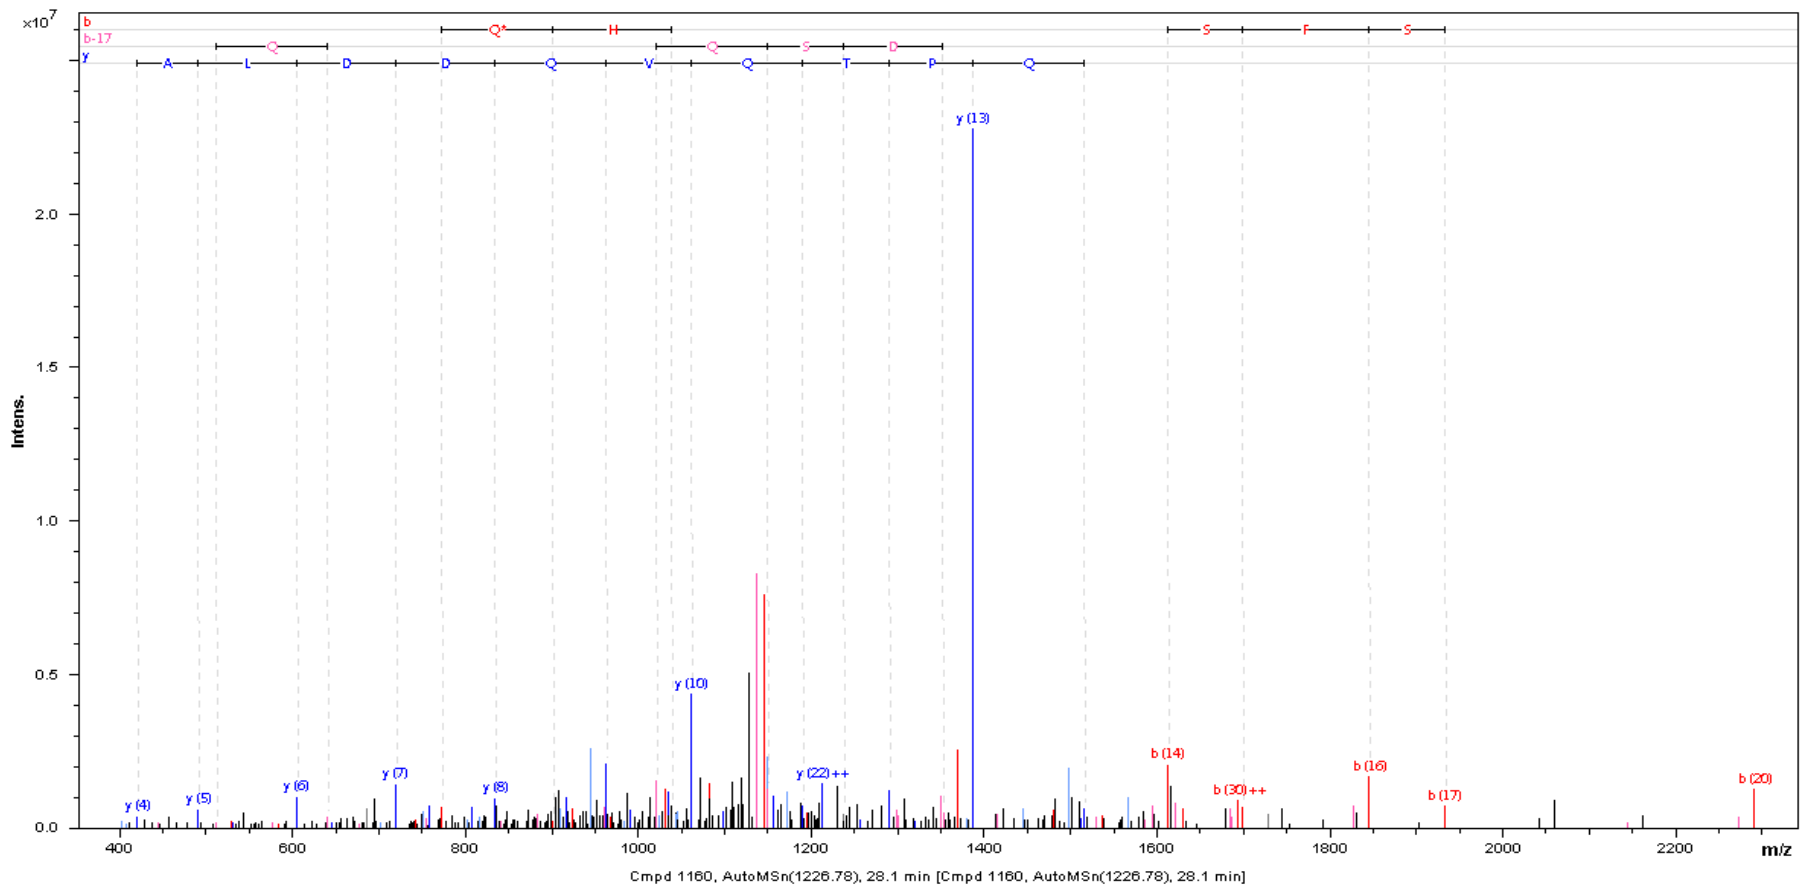

Membrane metallo-endopeptidase-like 1

K.NGNMLDWWSNFSAR.H

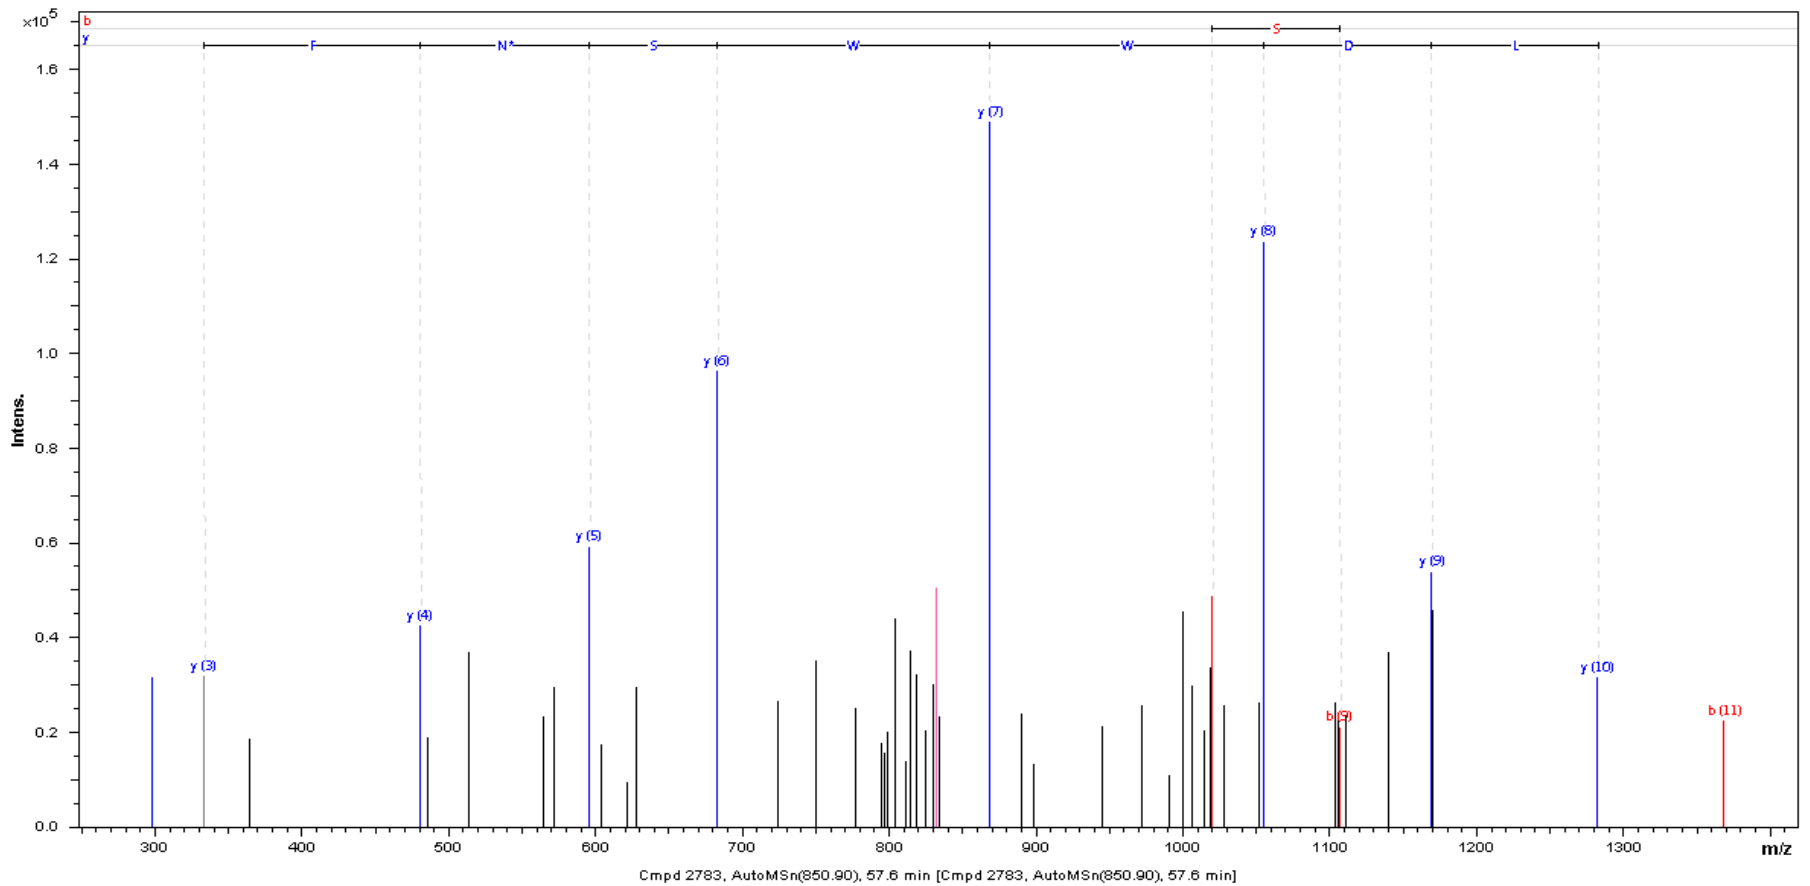

Membrane metallo-endopeptidase-like 1

R.EEMAEVLELETHLANATVPQEK.R

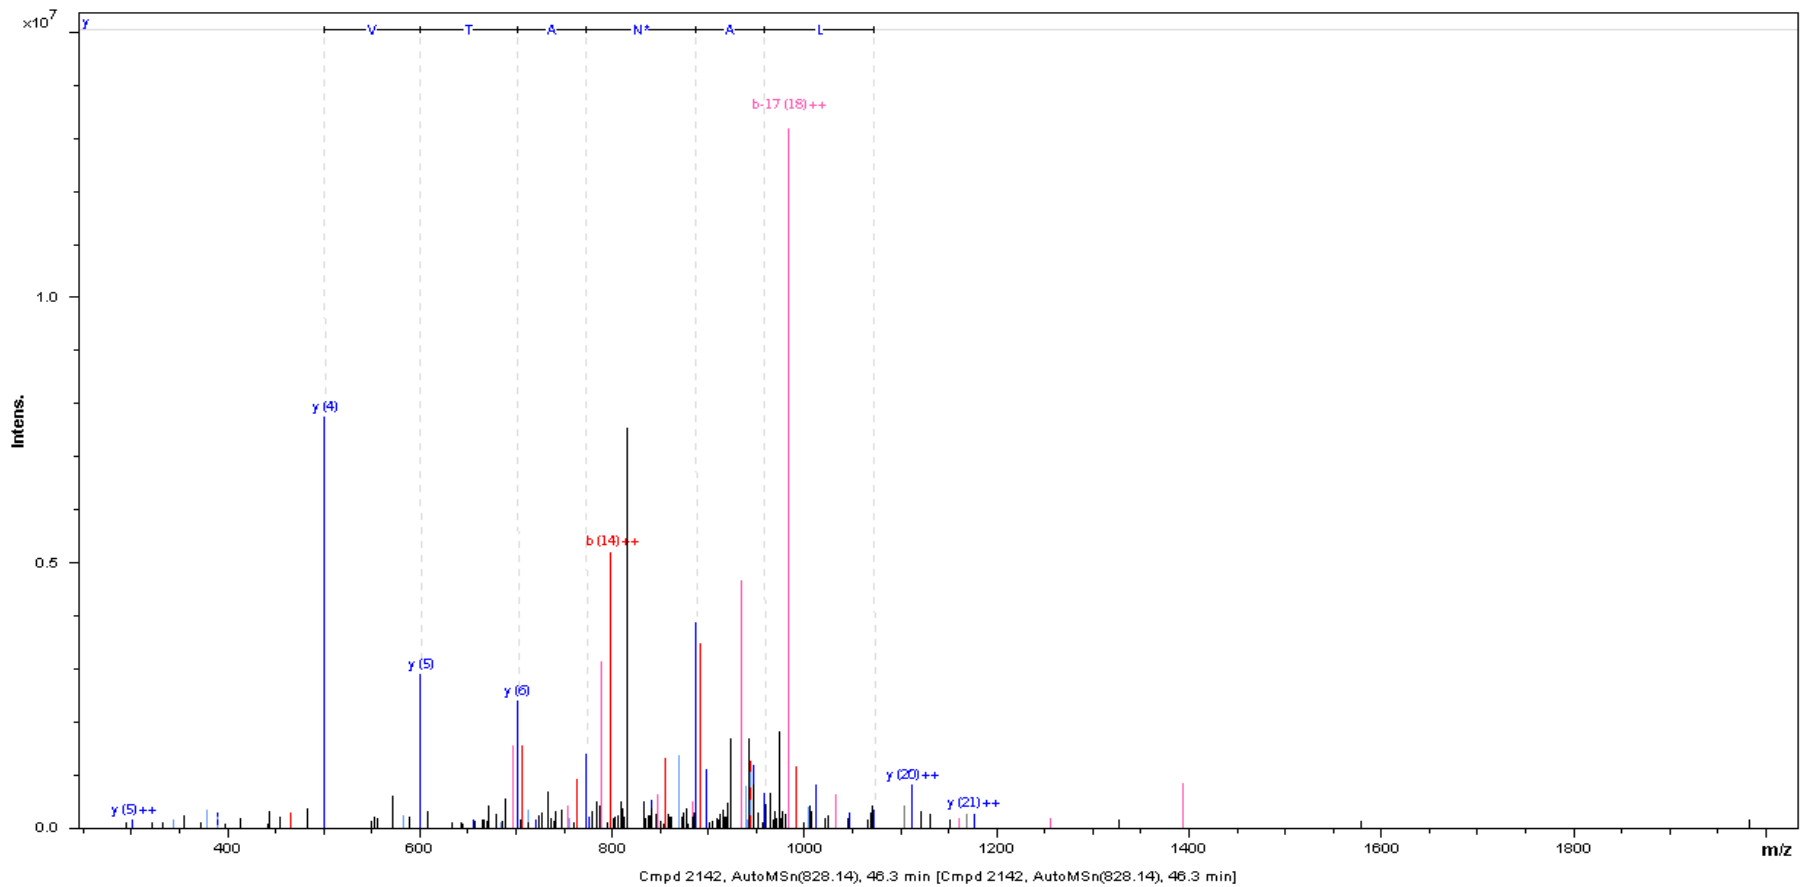

Membrane metallo-endopeptidase-like 1

R.VLIDLFIWDDQNSSR.H

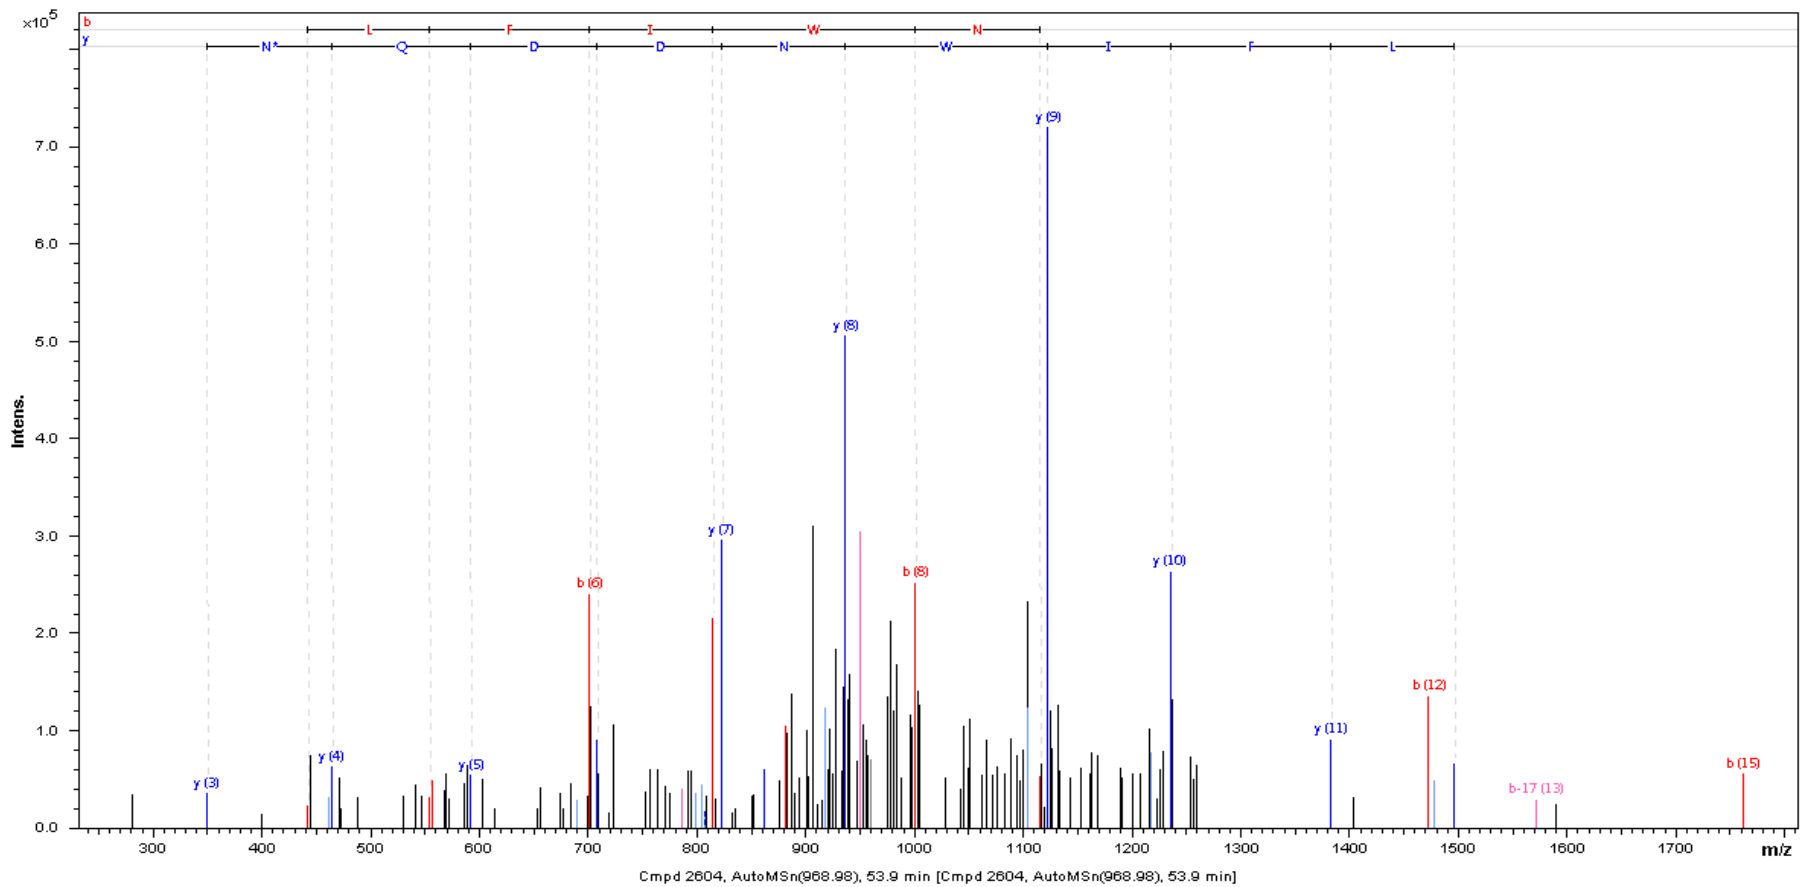

Ecto-ADP-ribosyltransferase 3

R.KGTSNDLVLQ**S**IN**S**TCSYYECAFLGGLK.T \*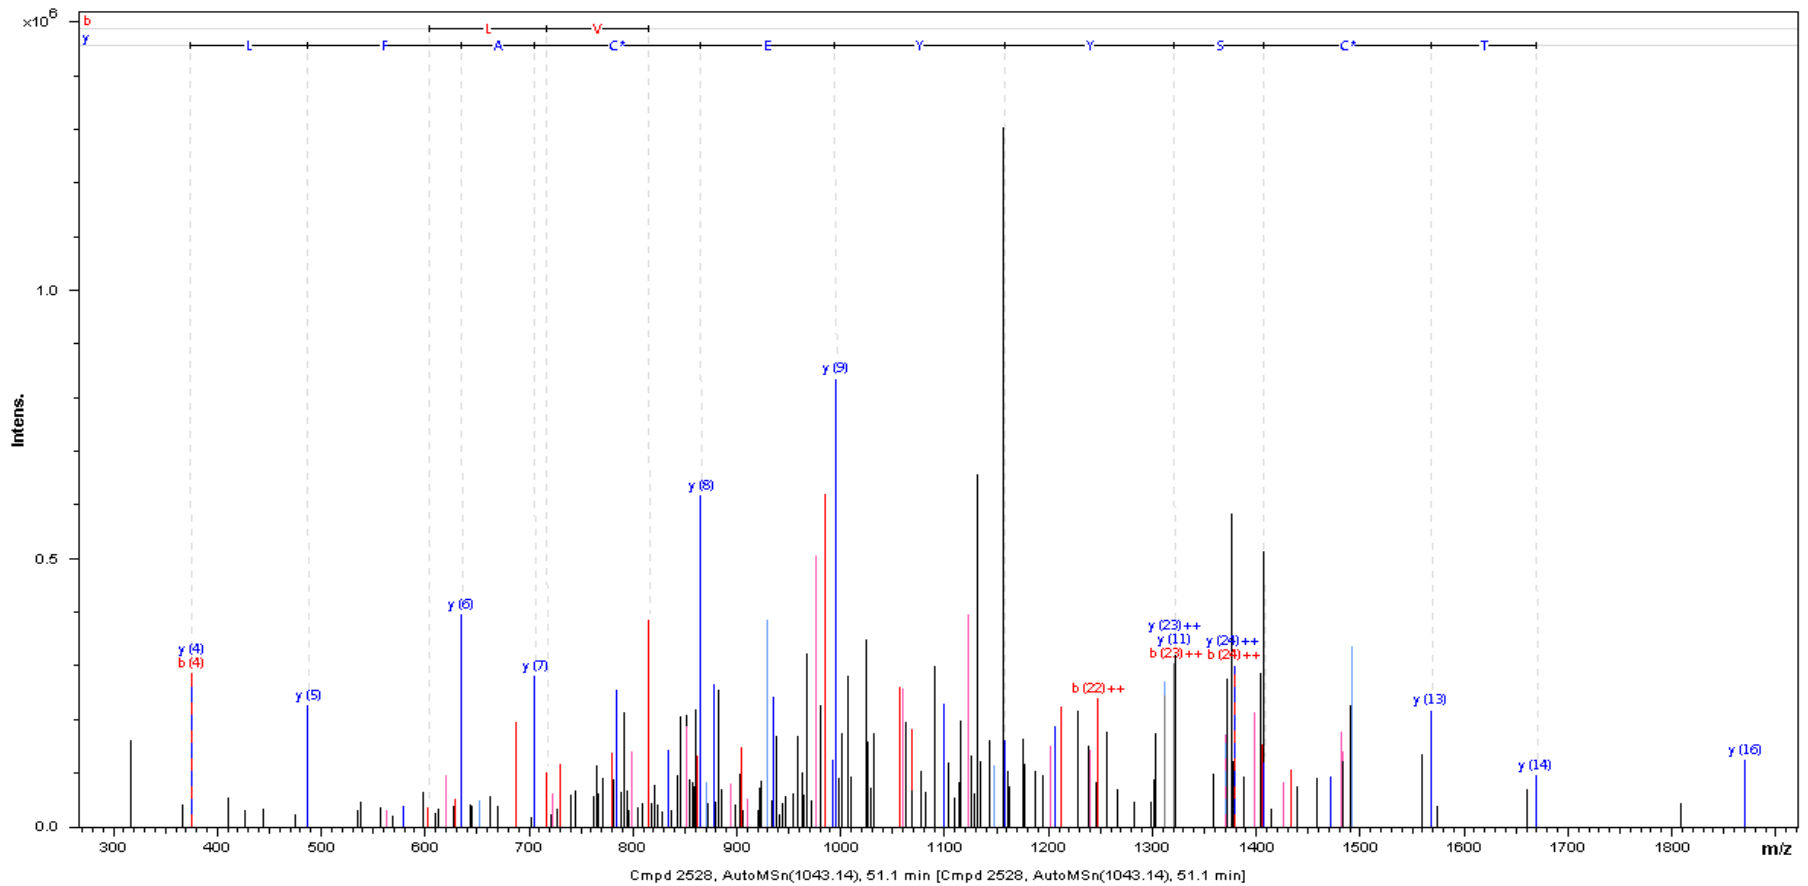

Ecto-ADP-ribosyltransferase 3

R.LGNFTLAYSAKPETADNQR.V \*

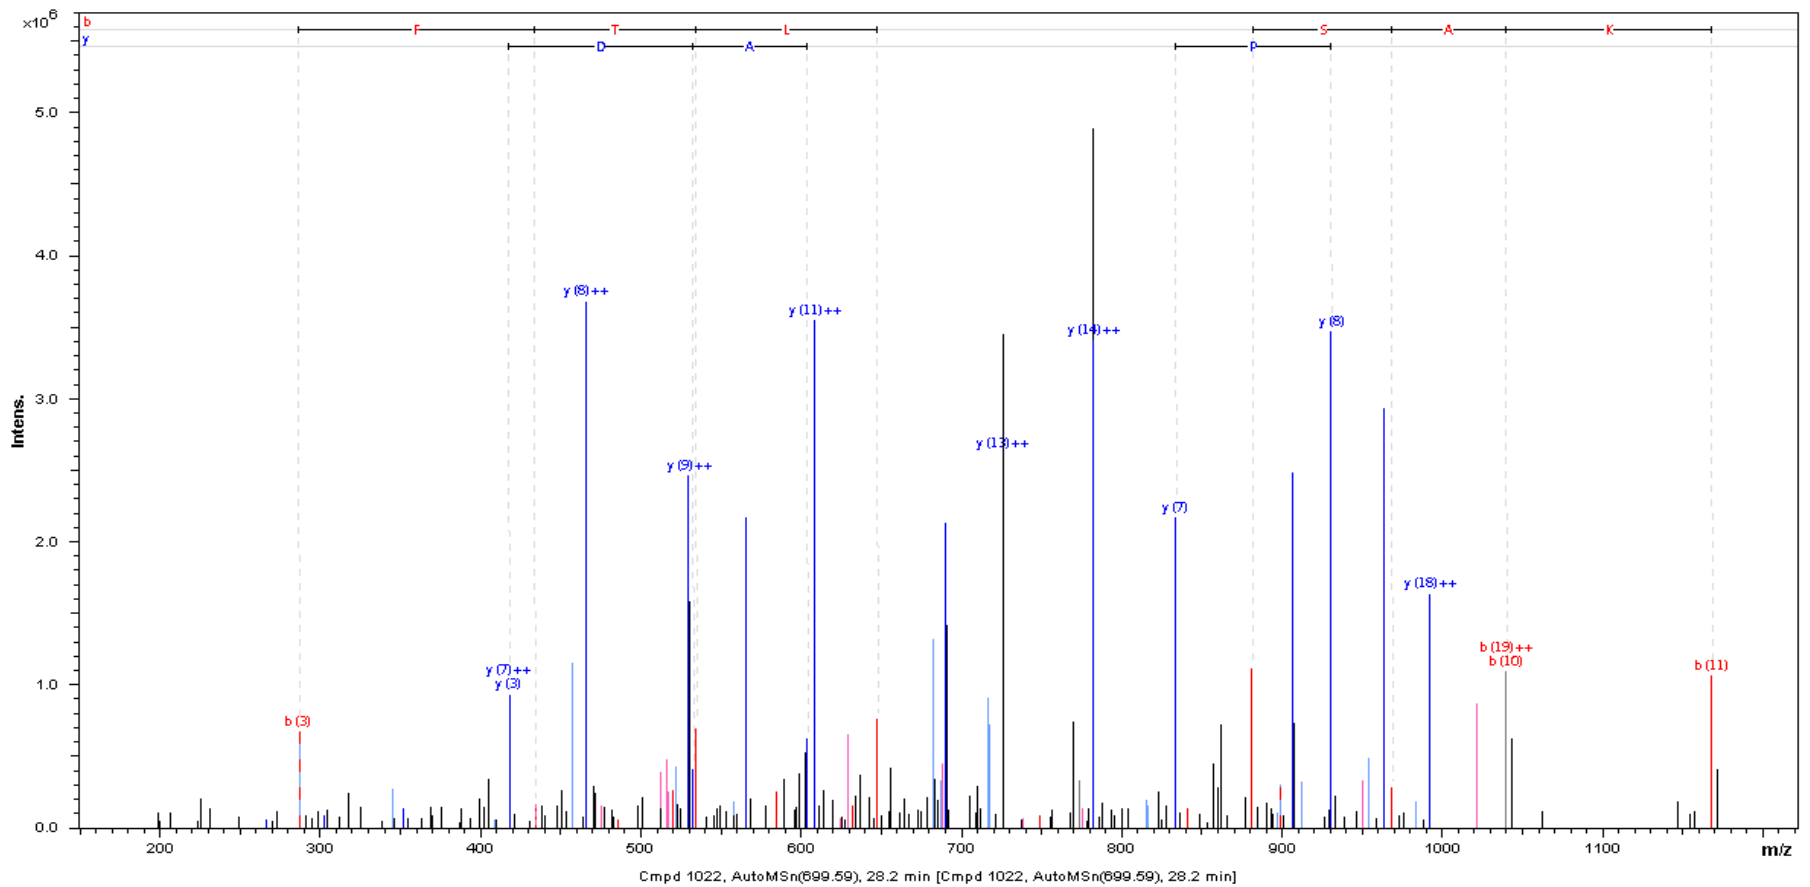



Nicastrin

K.DLYEYSWVQGPWNSNR.T \*

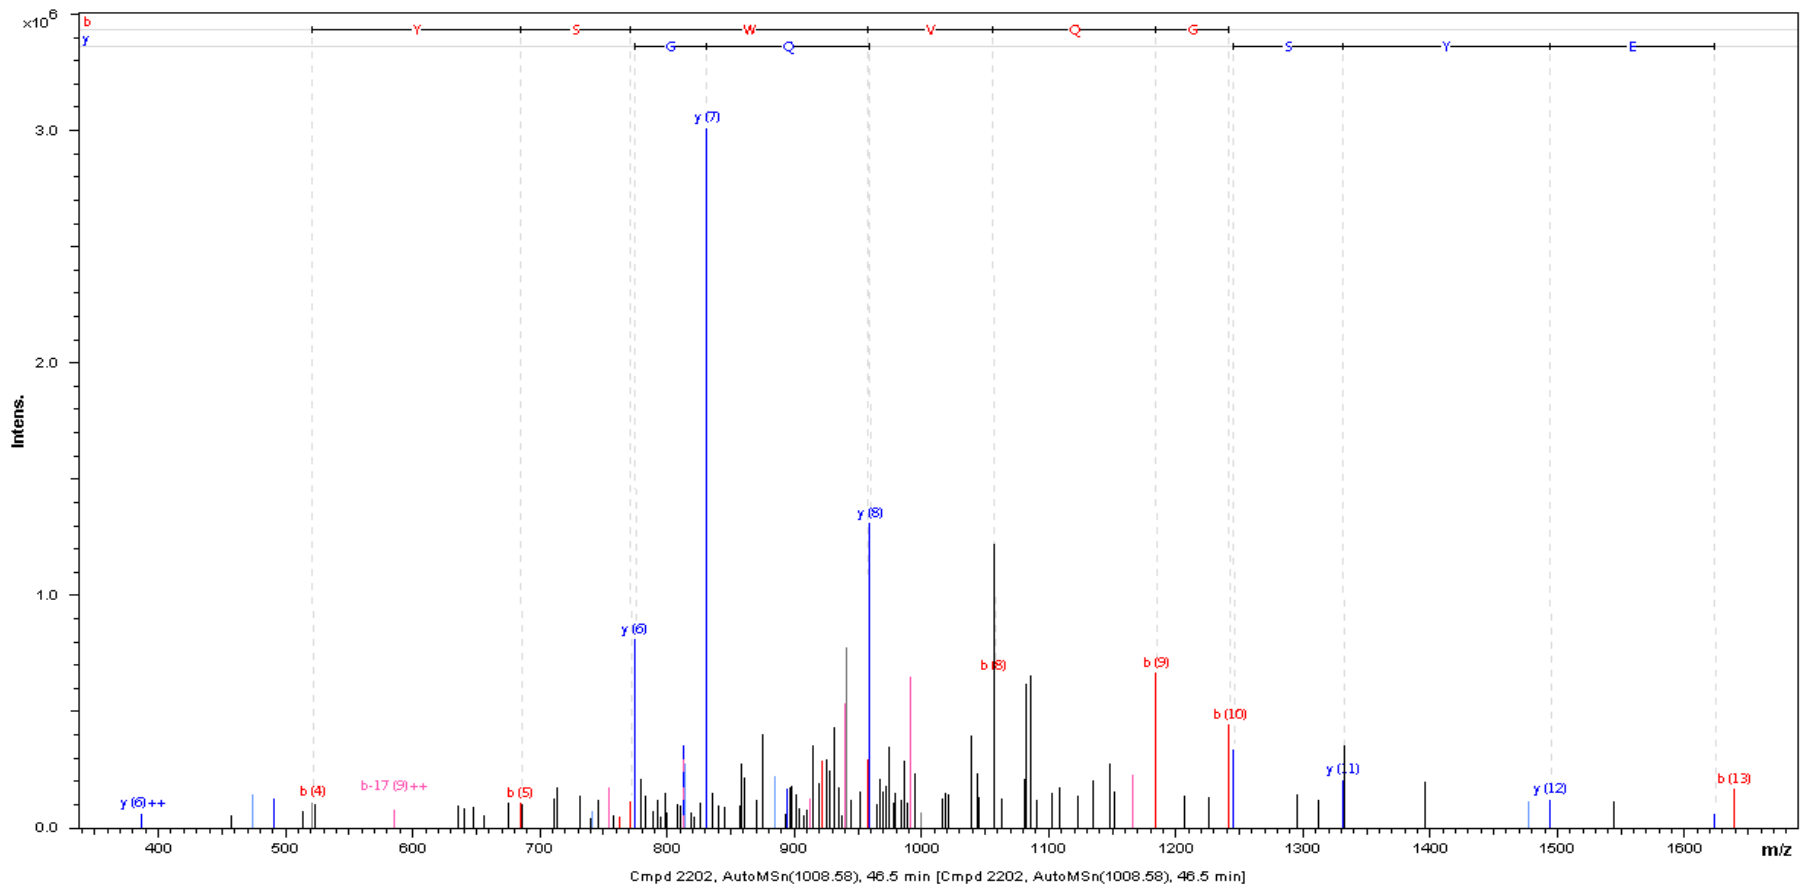

L-amino-acid oxidase precursor

K.VVTLGLNR.T

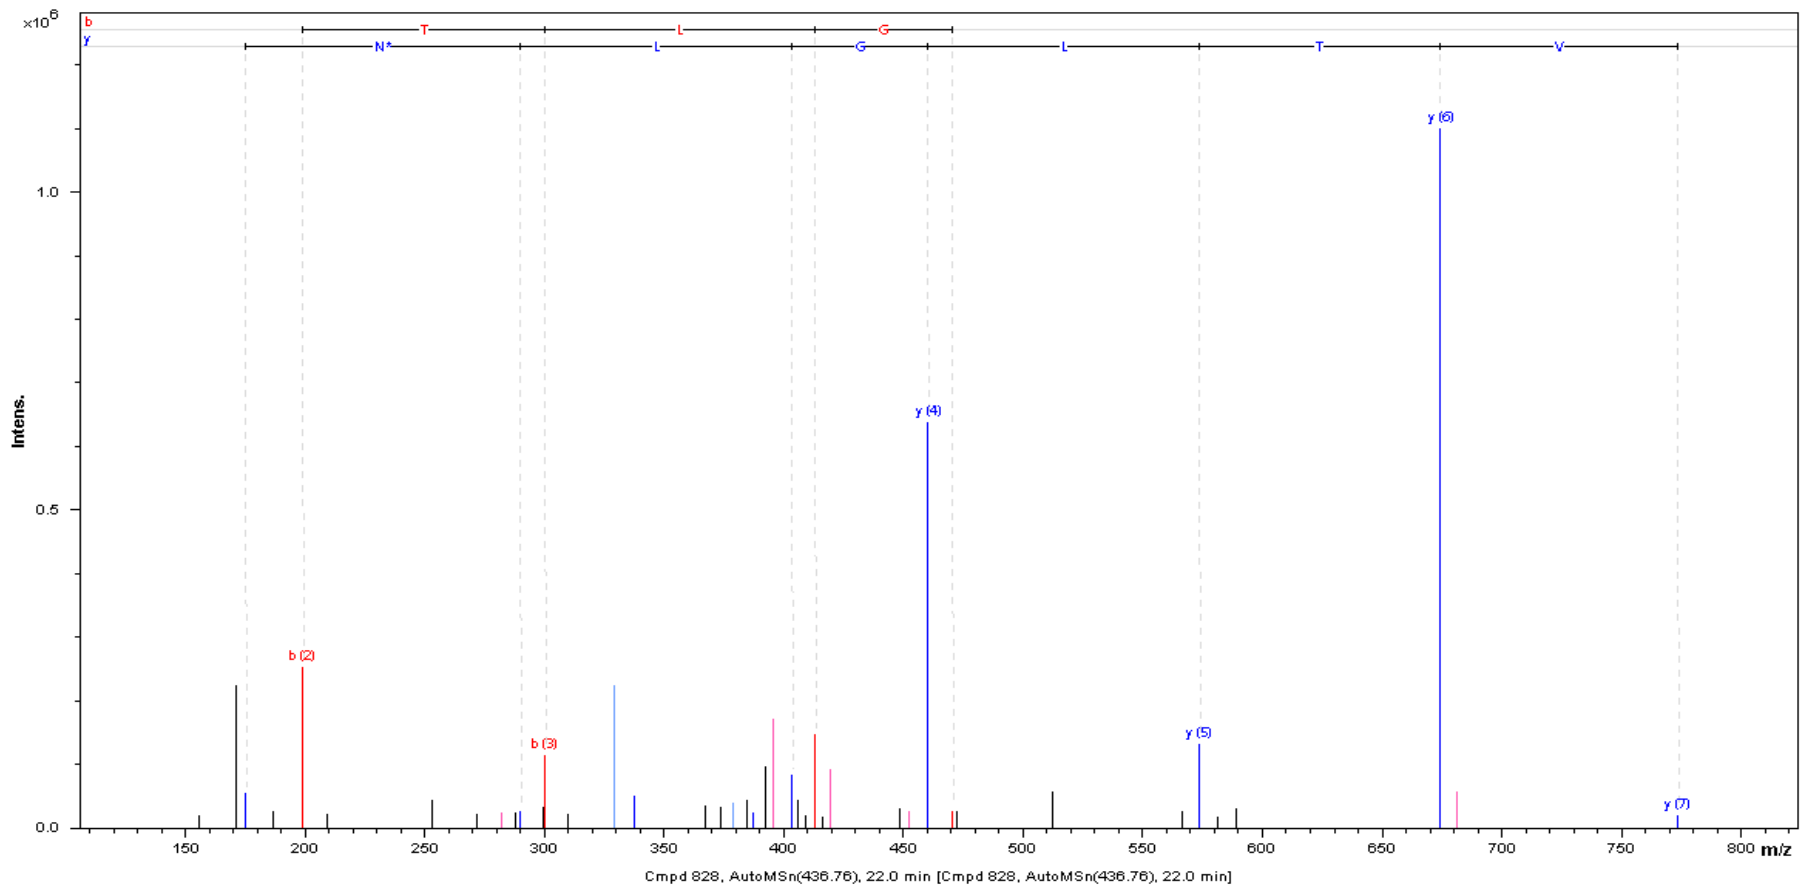

L-amino-acid oxidase precursor

R.TLGLNLTQFTQYDENTWTEVHNVK.L

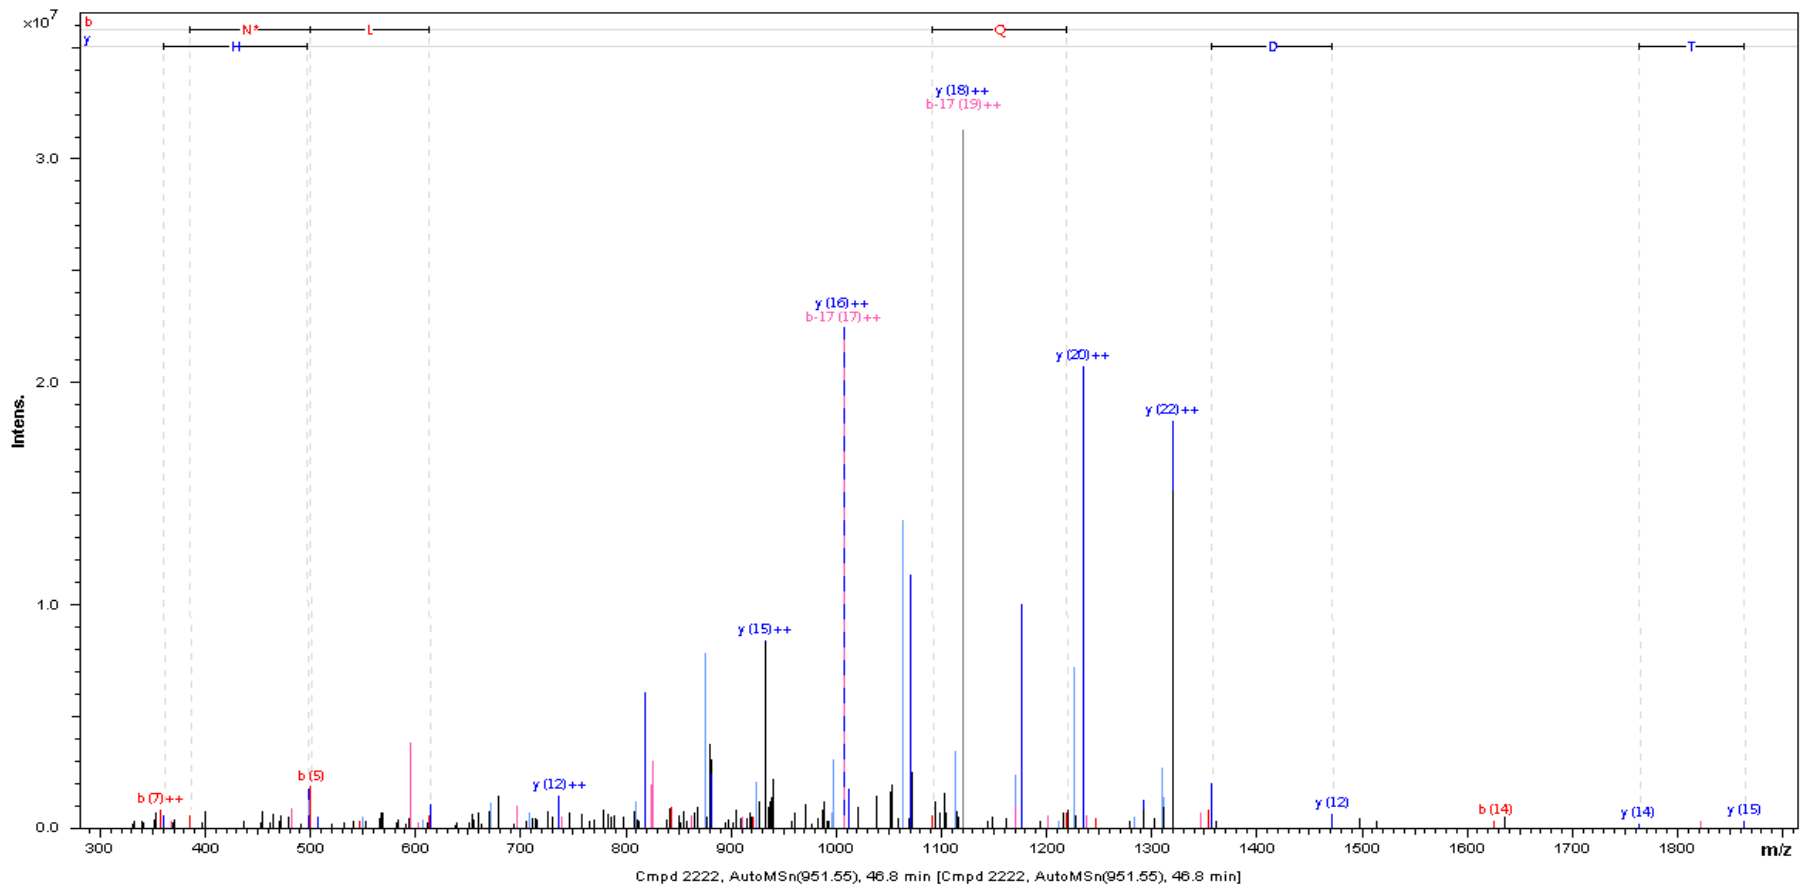

Nuclear pore membrane glycoprotein 210-like precursor

K.CFPNSSVIEEDGGGLLR.S

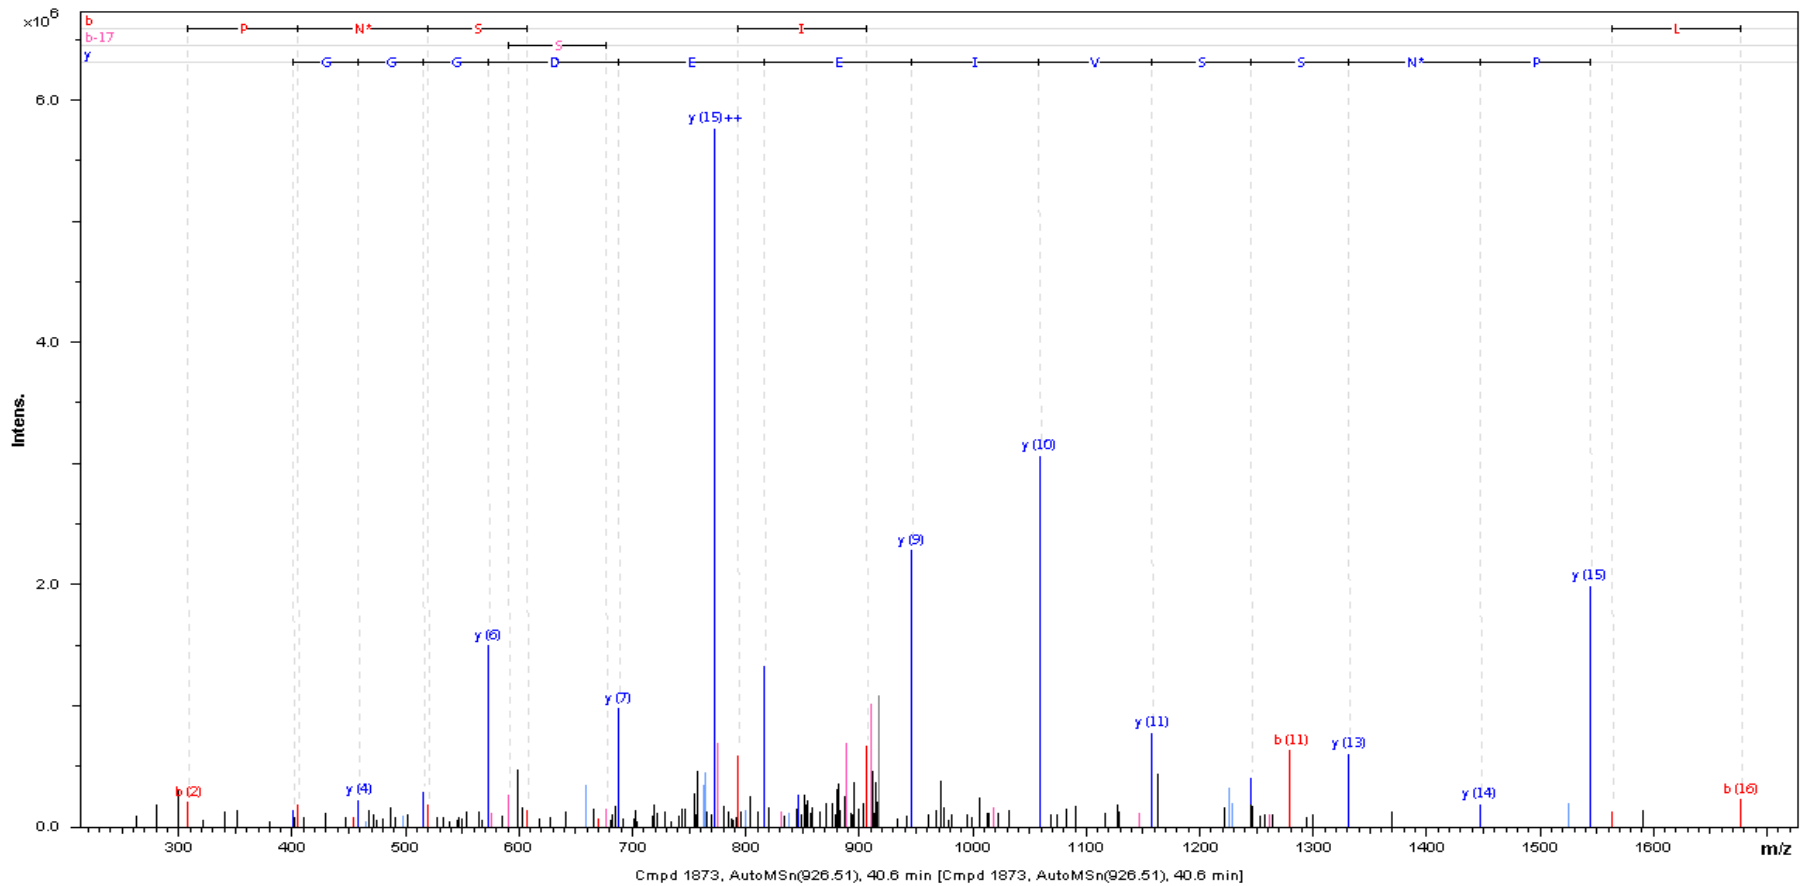

Nuclear pore membrane glycoprotein 210-like precursor

K.EYFEEQLSTSNGSYHVVK.A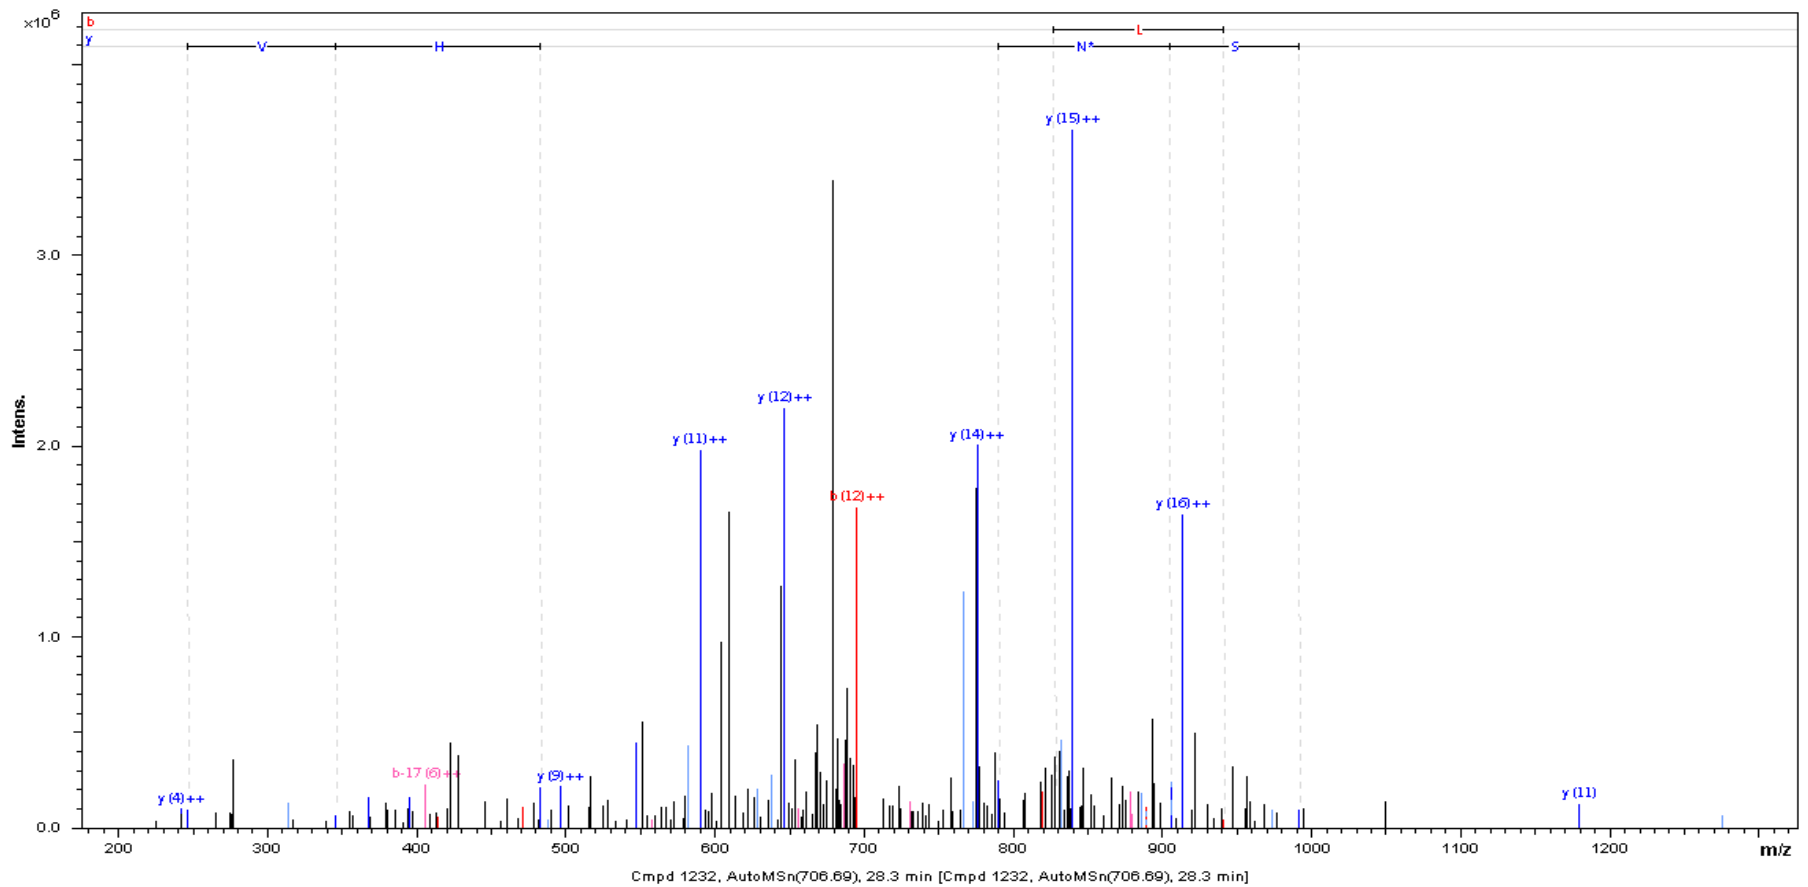

Nuclear pore membrane glycoprotein 210-like precursor

K.SSNETLAHFEDSK.S

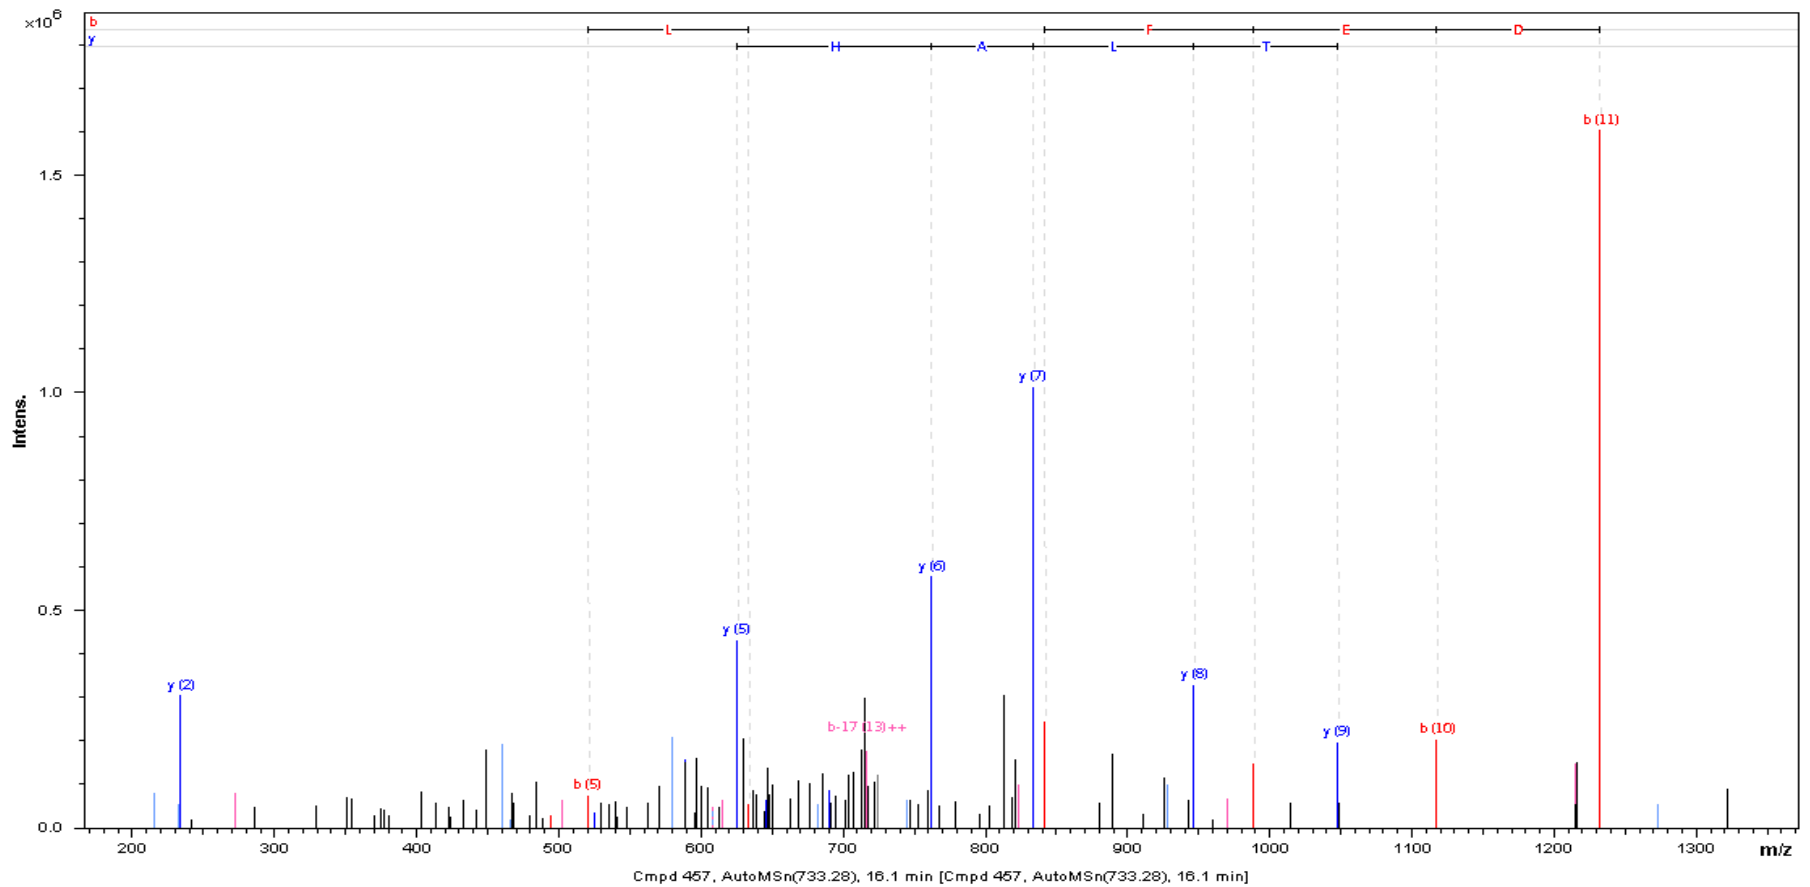

Nuclear pore membrane glycoprotein 210-like precursor

R.EVVVNASSR.L

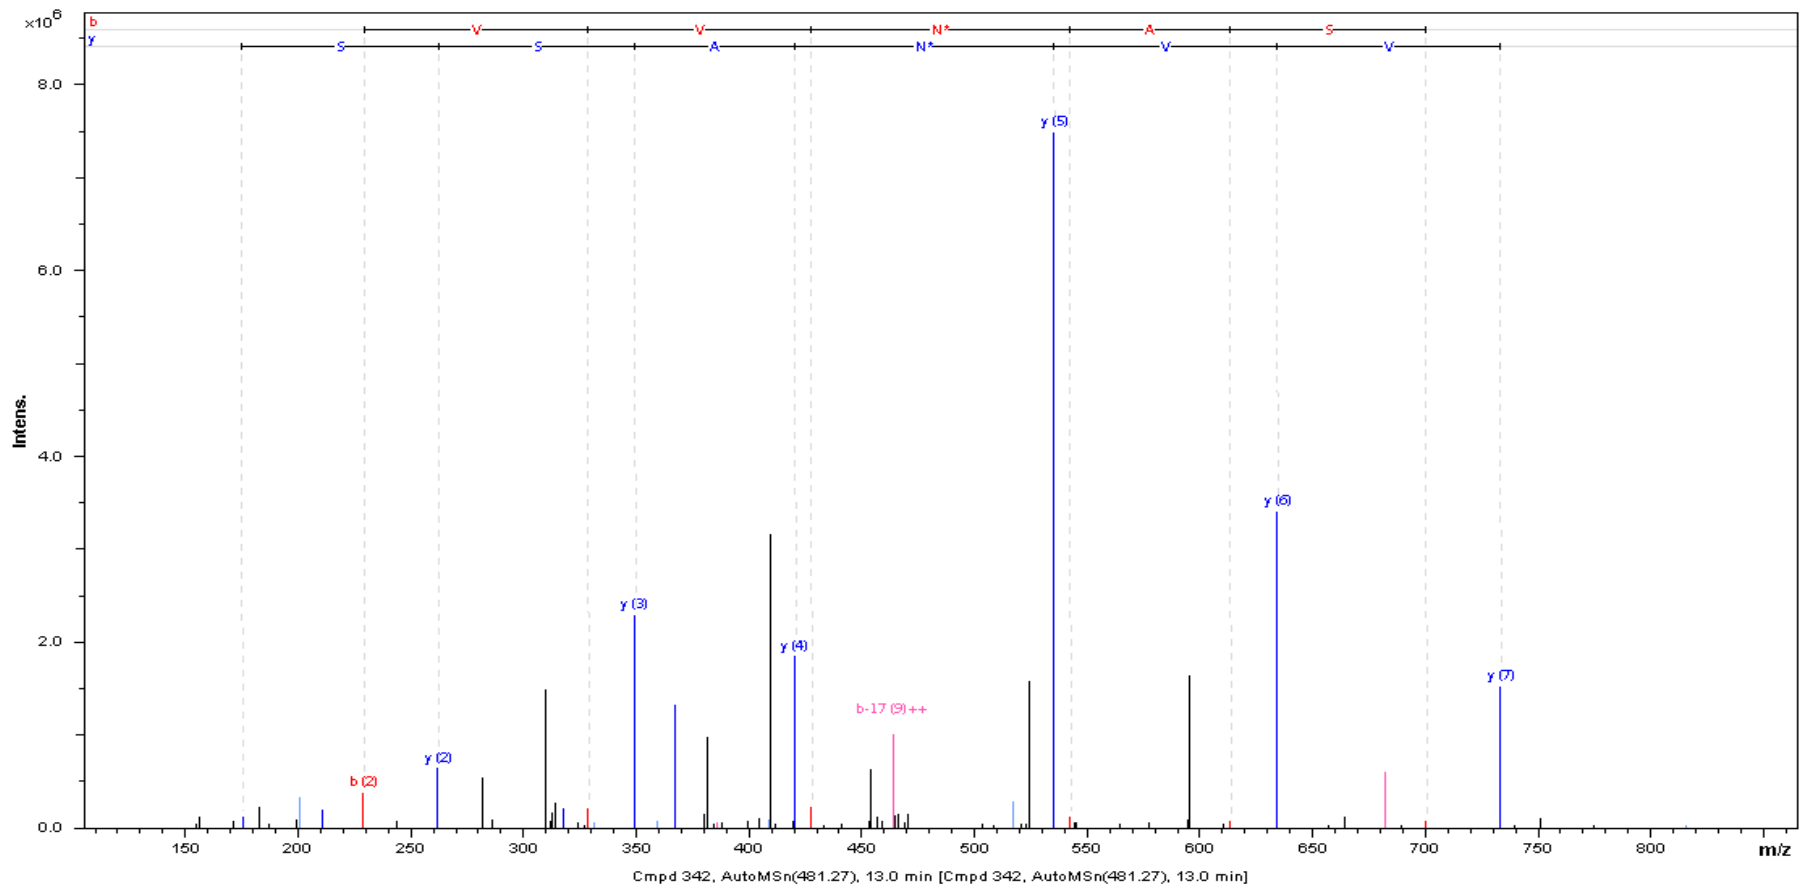

Nuclear pore membrane glycoprotein 210-like precursor

R.GNSTILAR.D

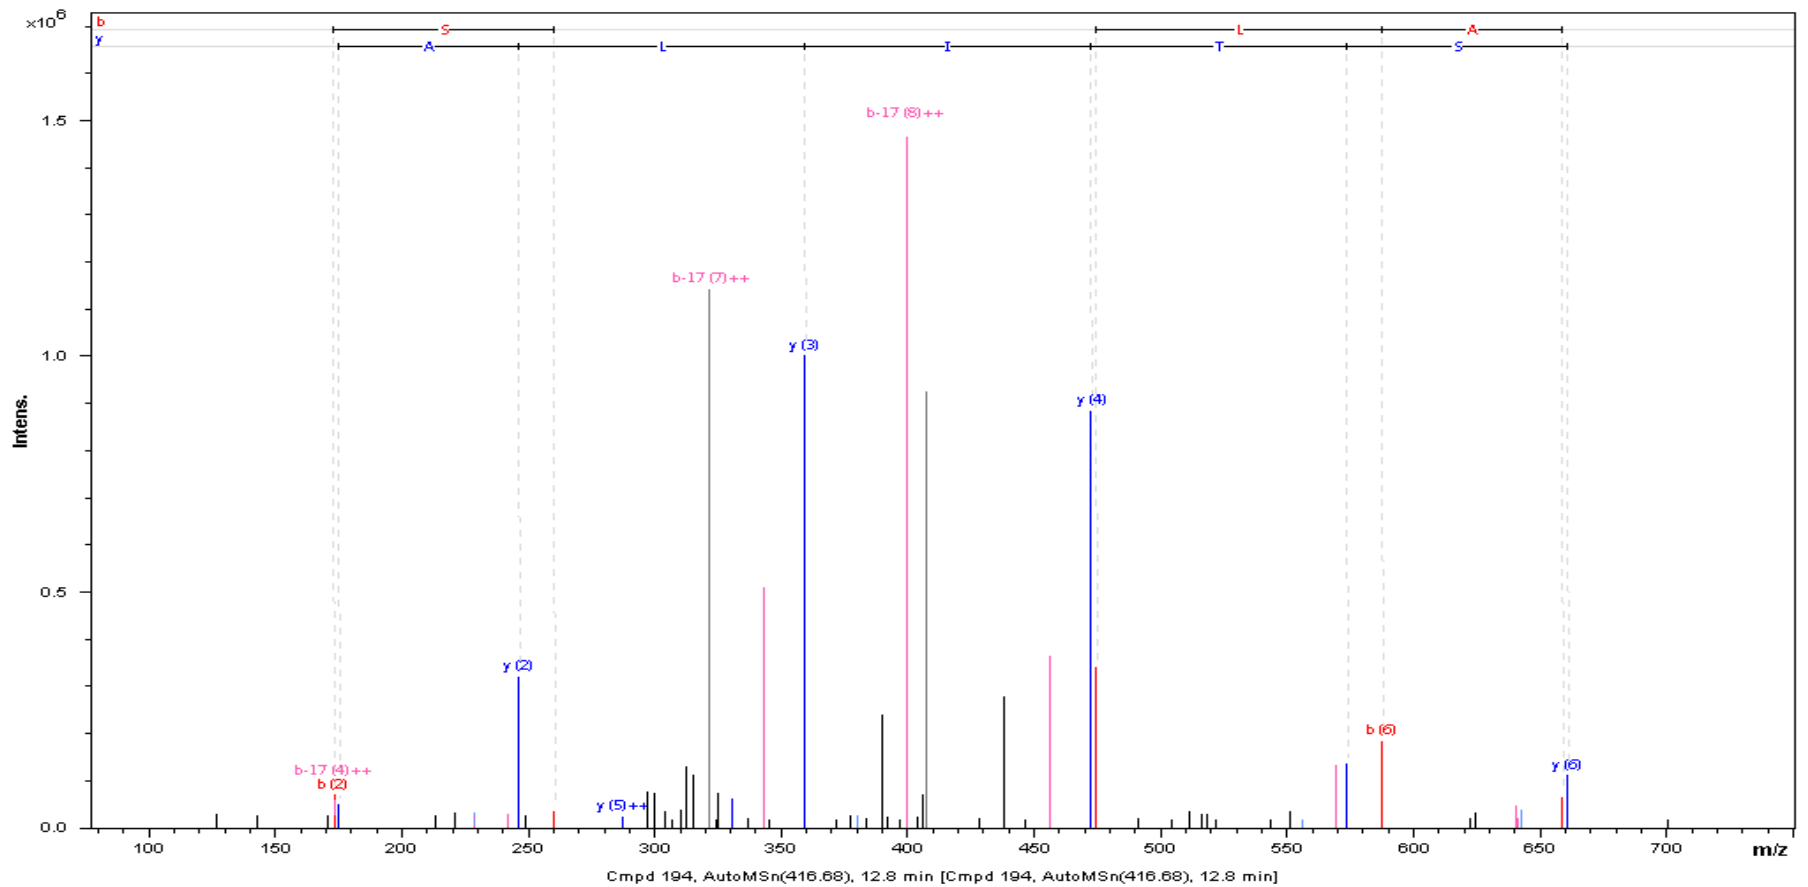



Nuclear pore membrane glycoprotein 210-like precursor

R.ILIPFIPGFYMNQSEVLGHK.D

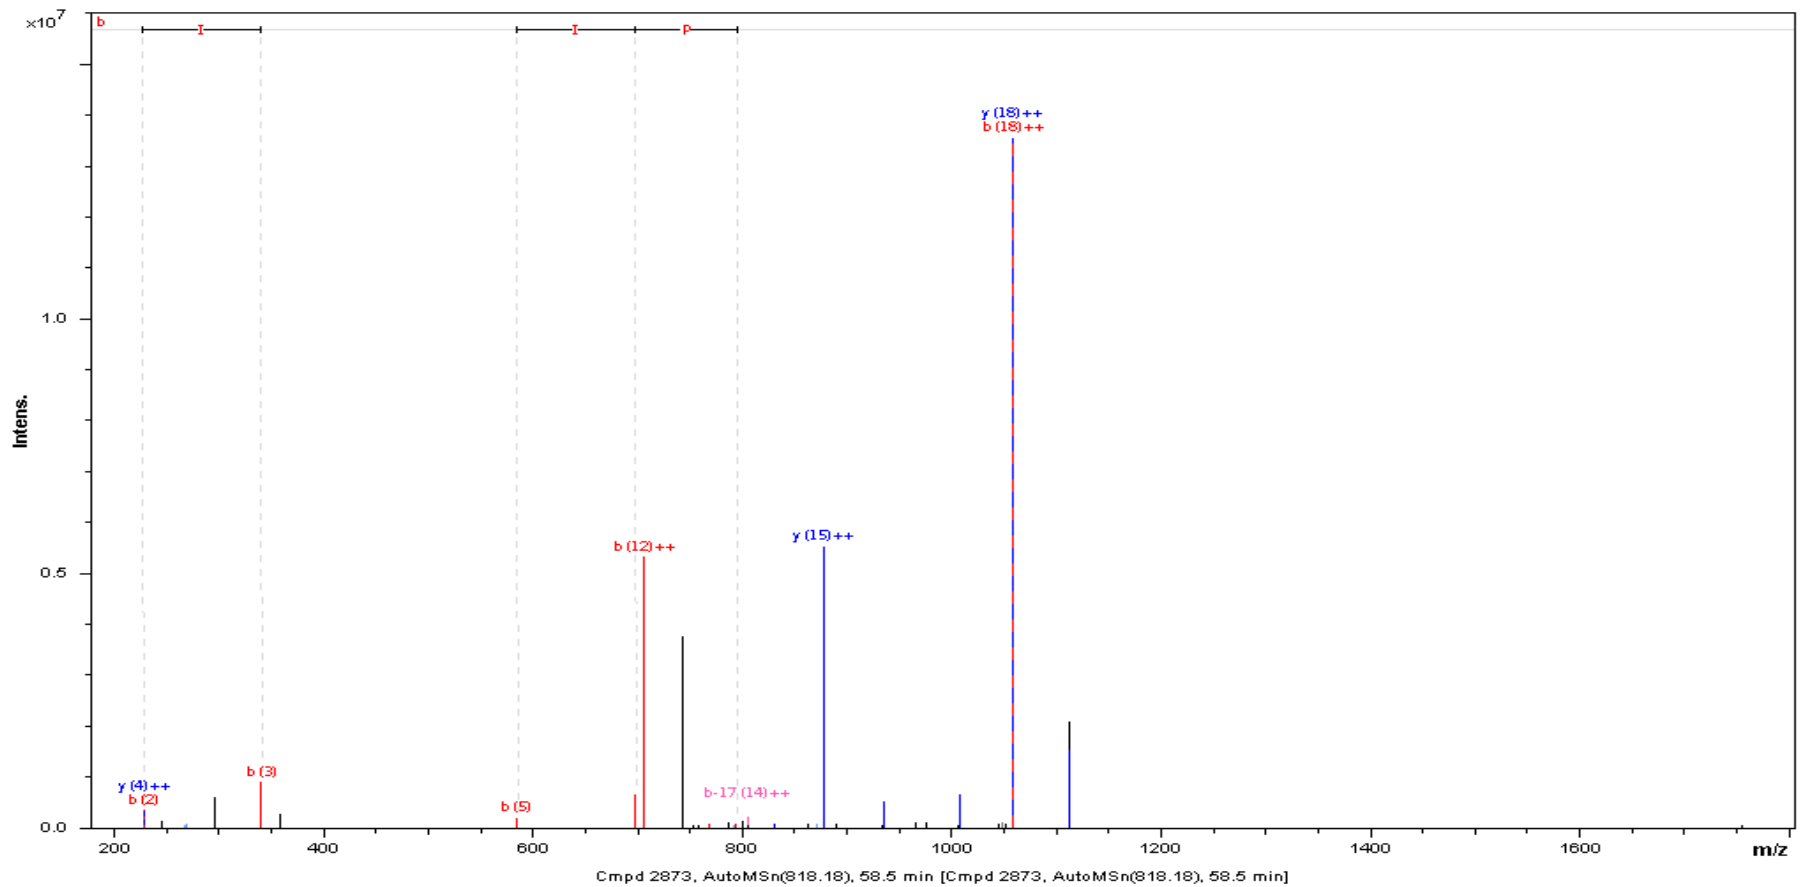

Nuclear pore membrane glycoprotein 210-like precursor

R.KFDNFSSLMLEWK.S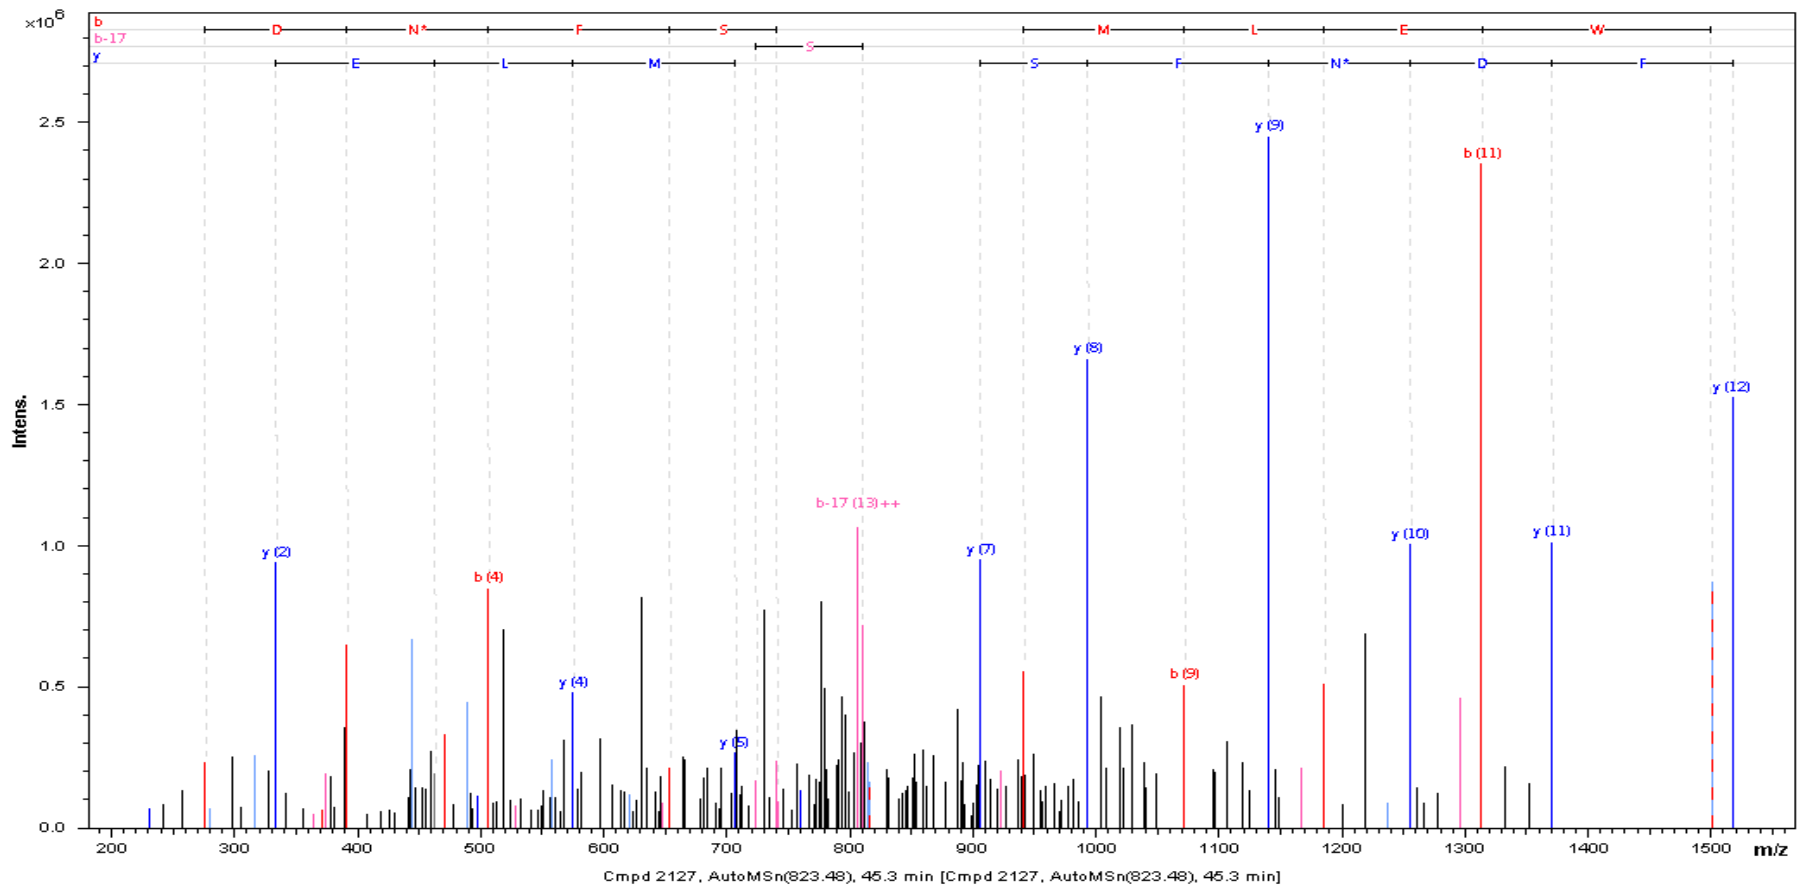

Lysosomal Pro-X carboxypeptidase precursor

K.NISSHSNIIFSNGELDPWSGGGVTR.D \*

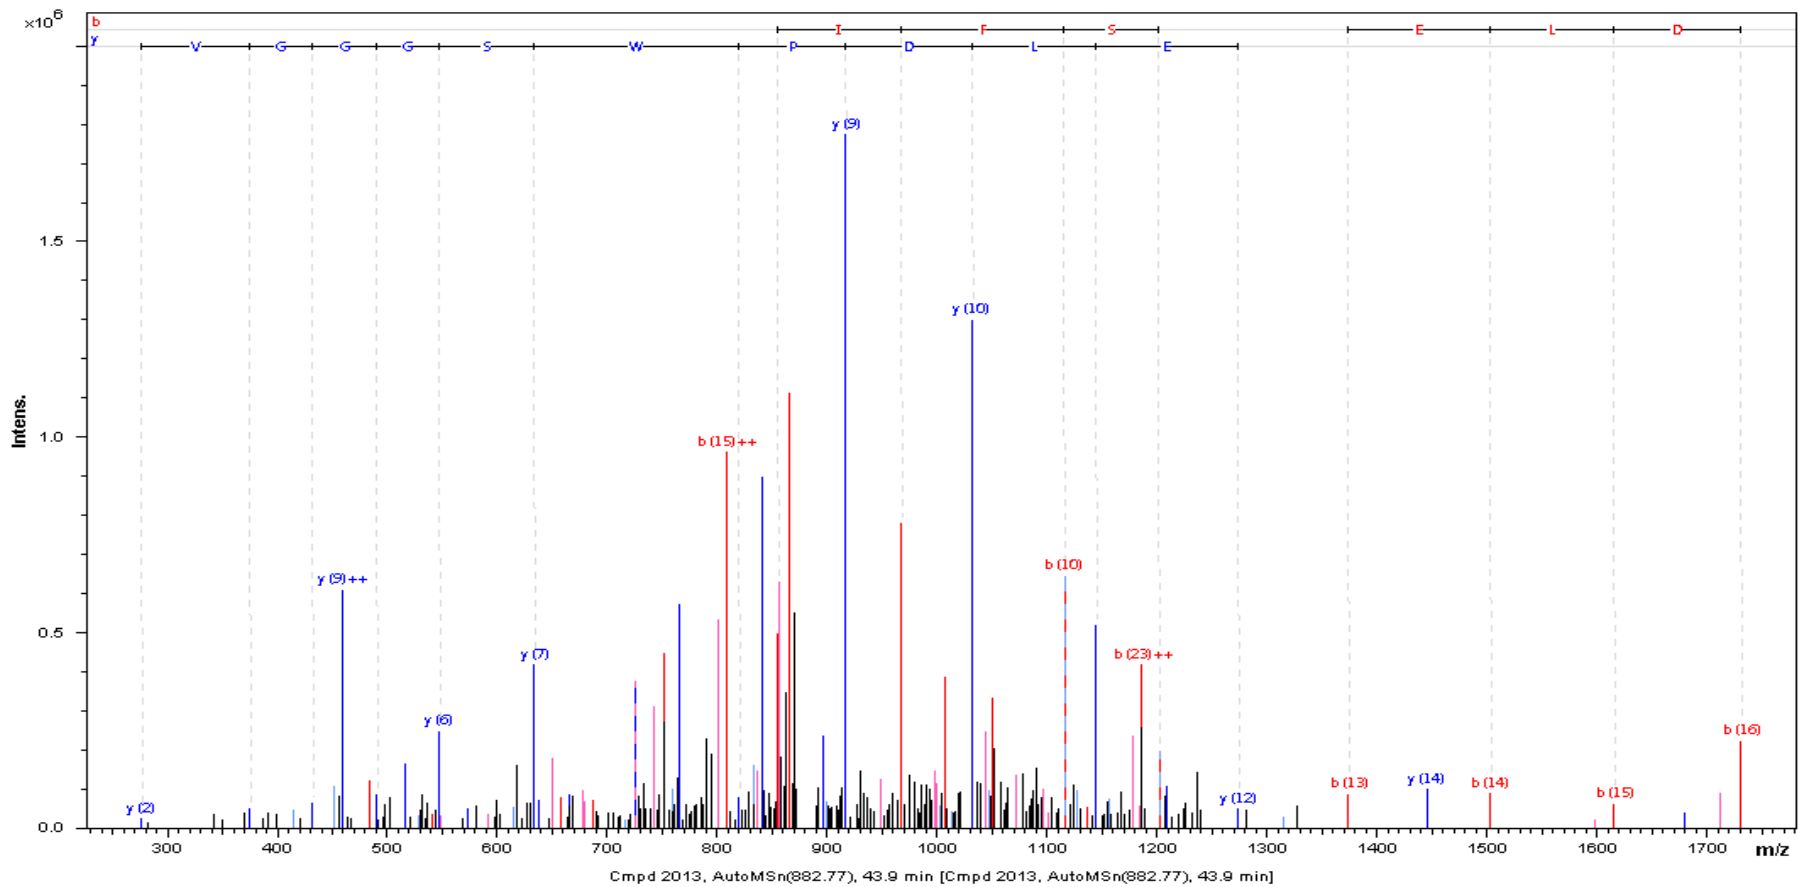

Protein disulfide-isomerase-like protein of the testis

K.ALLFNNSDEVADFVK.S

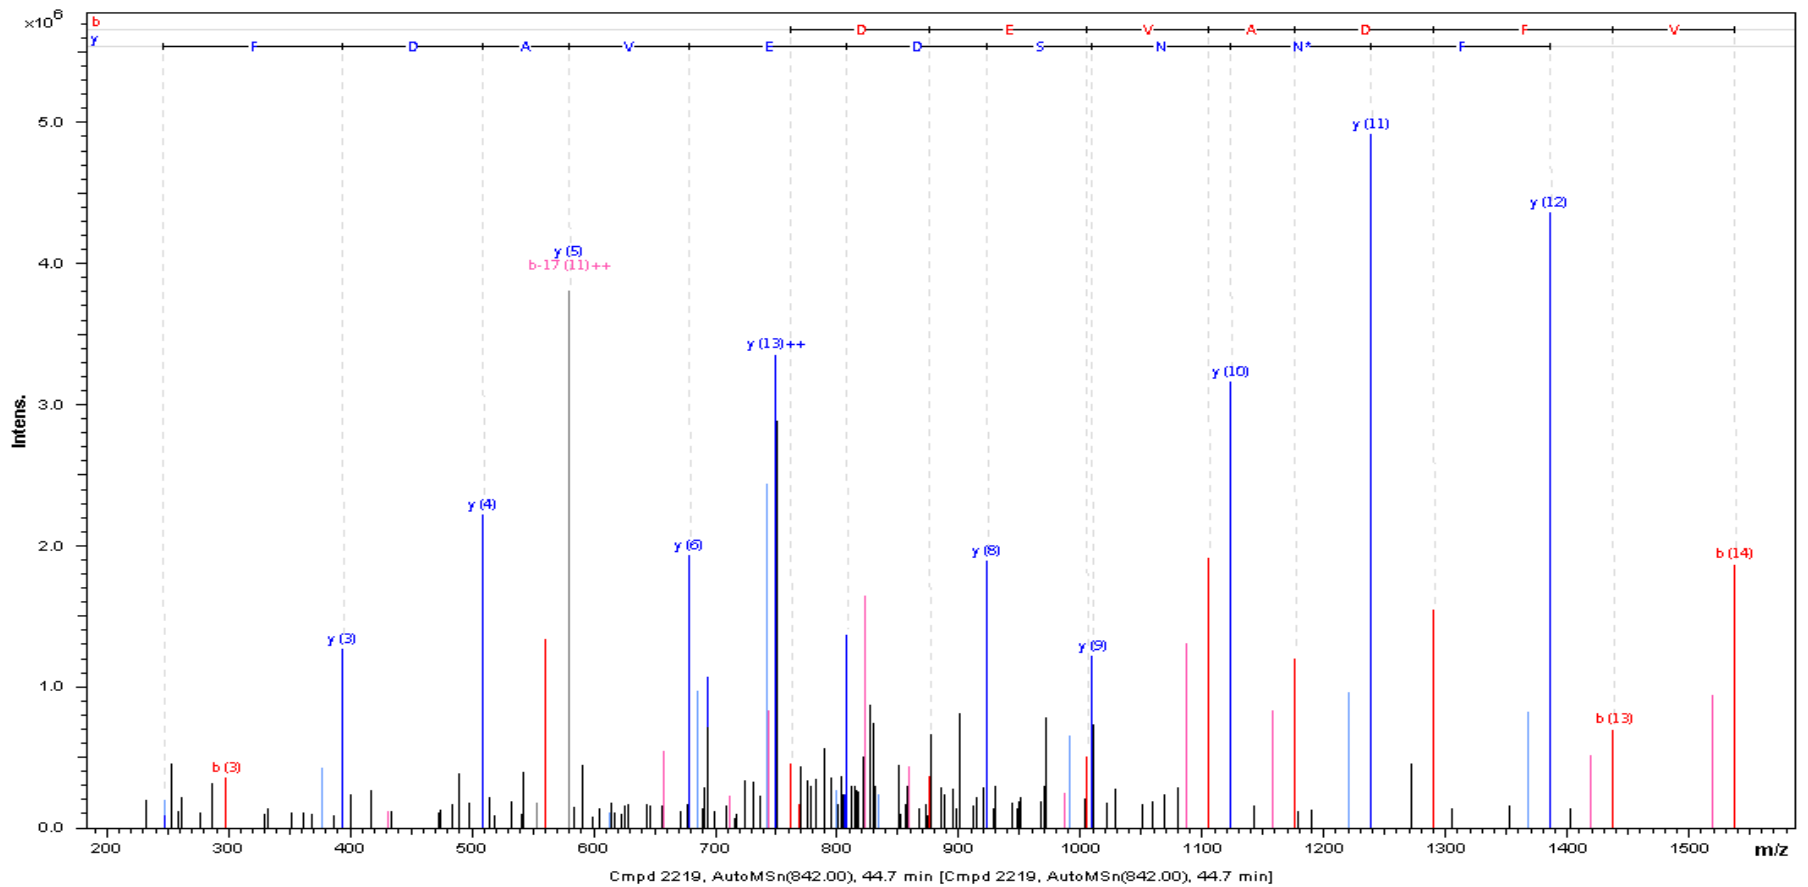

Phospholipase B1, membrane-associated

K.AENLTSQVR.T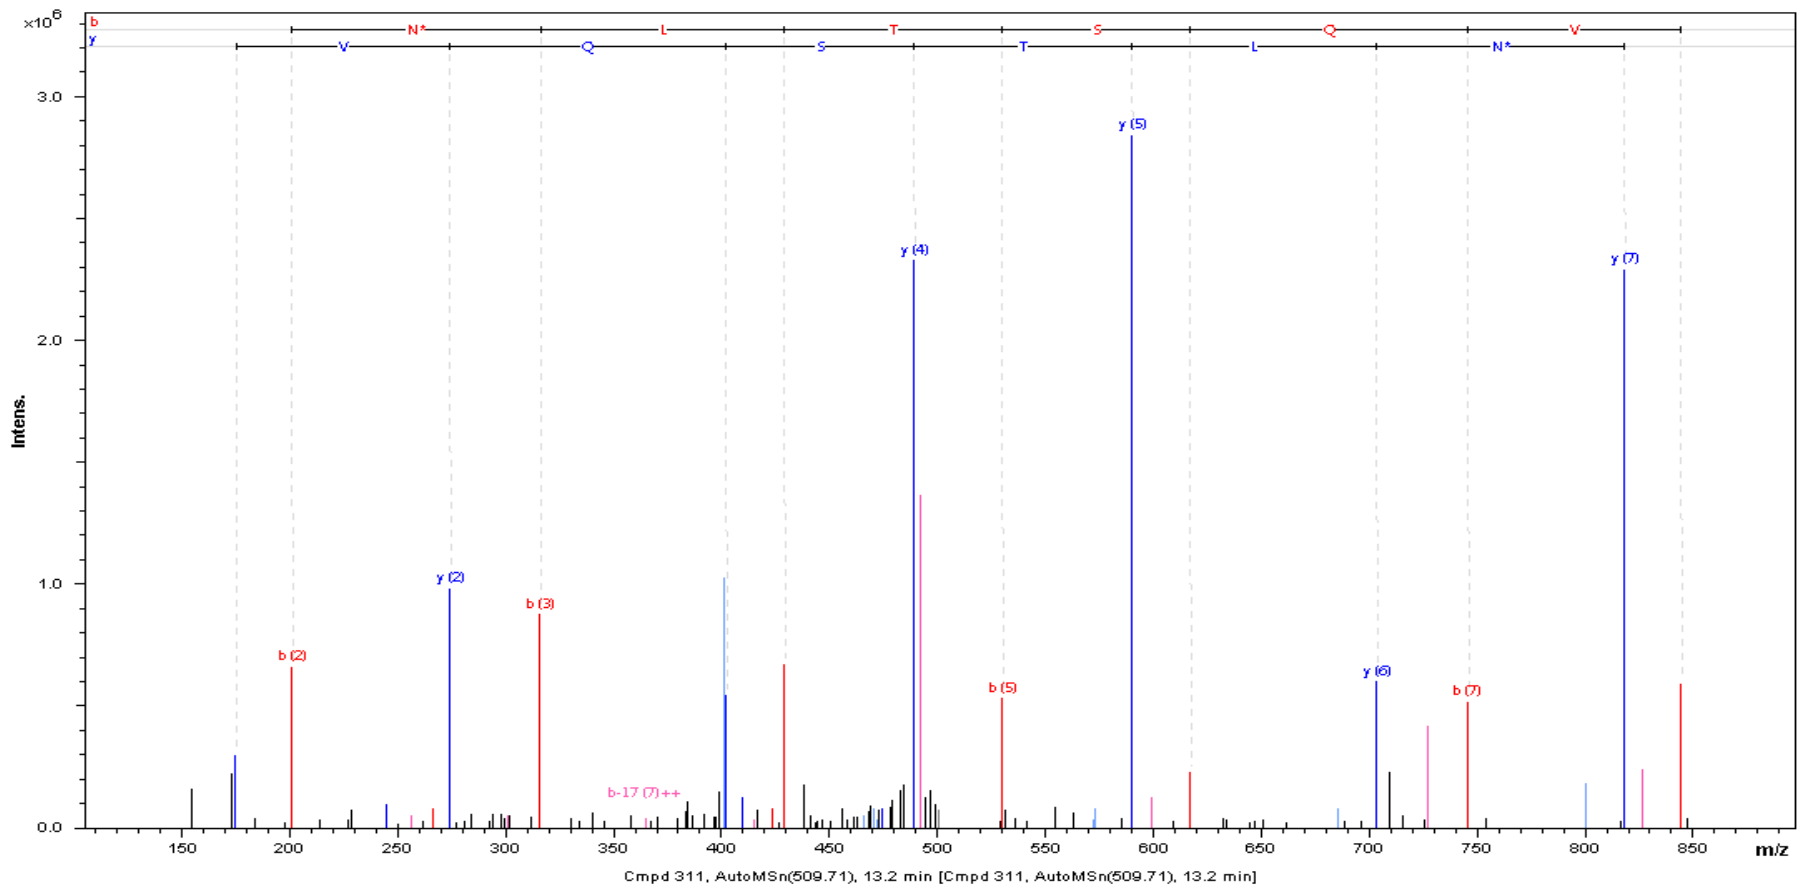

Phospholipase B1, membrane-associated

K.NSNLGNGTWMVCEER.A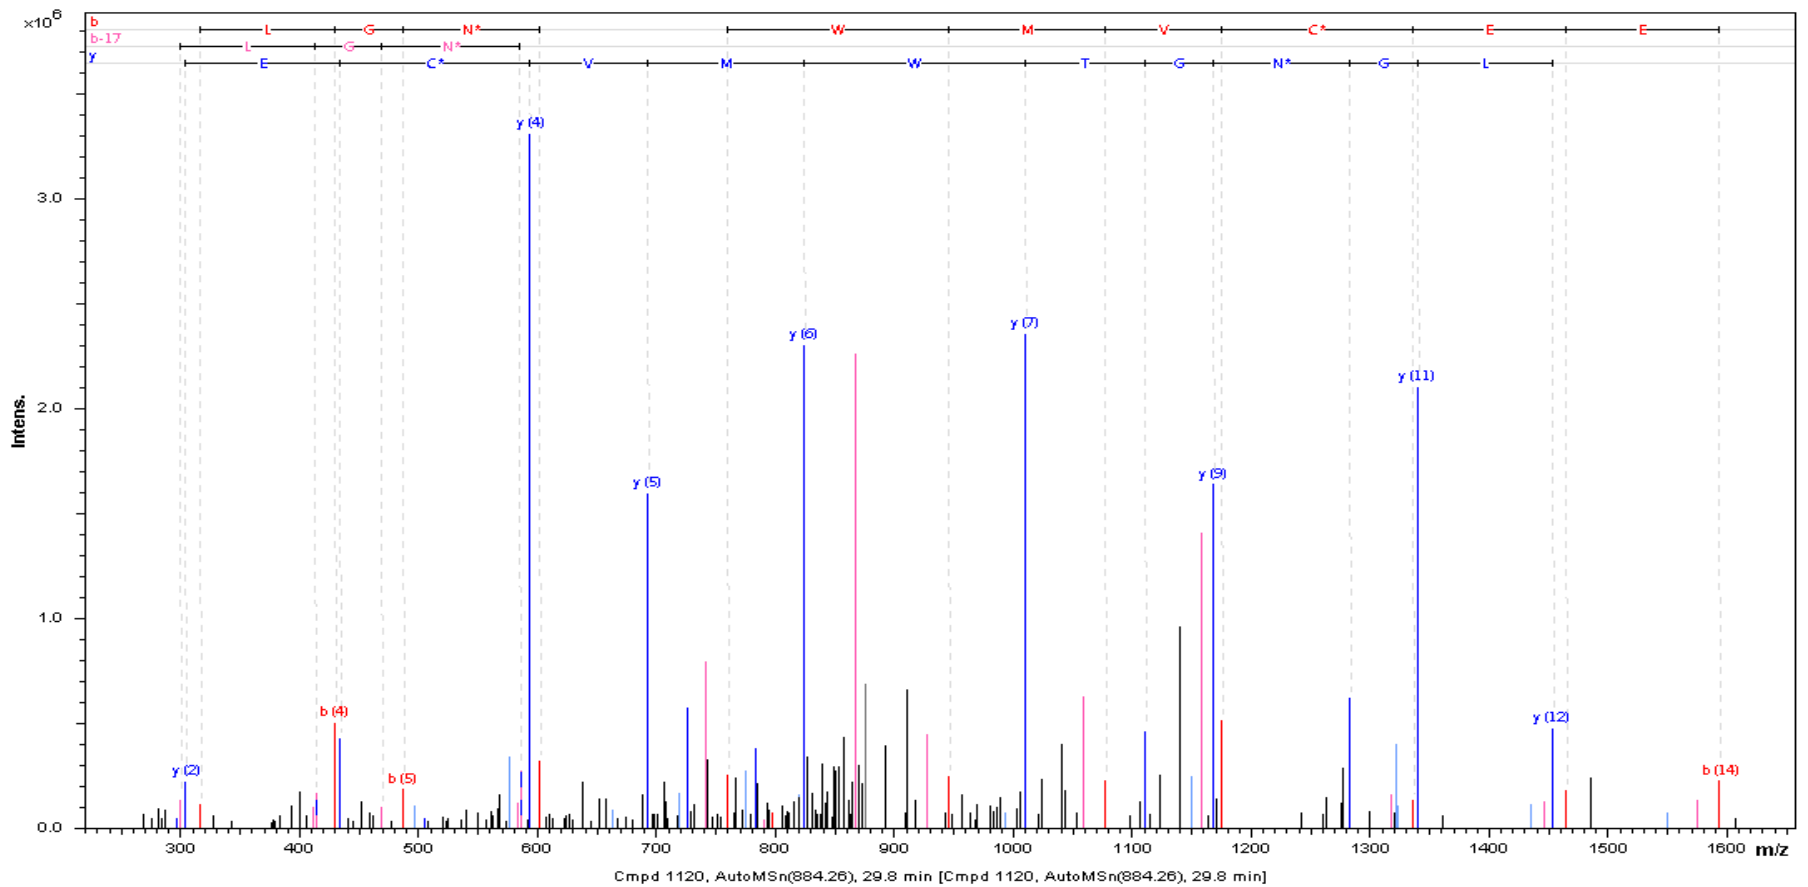

Phospholipase B1, membrane-associated

K.TLENVTTLPNILR.K

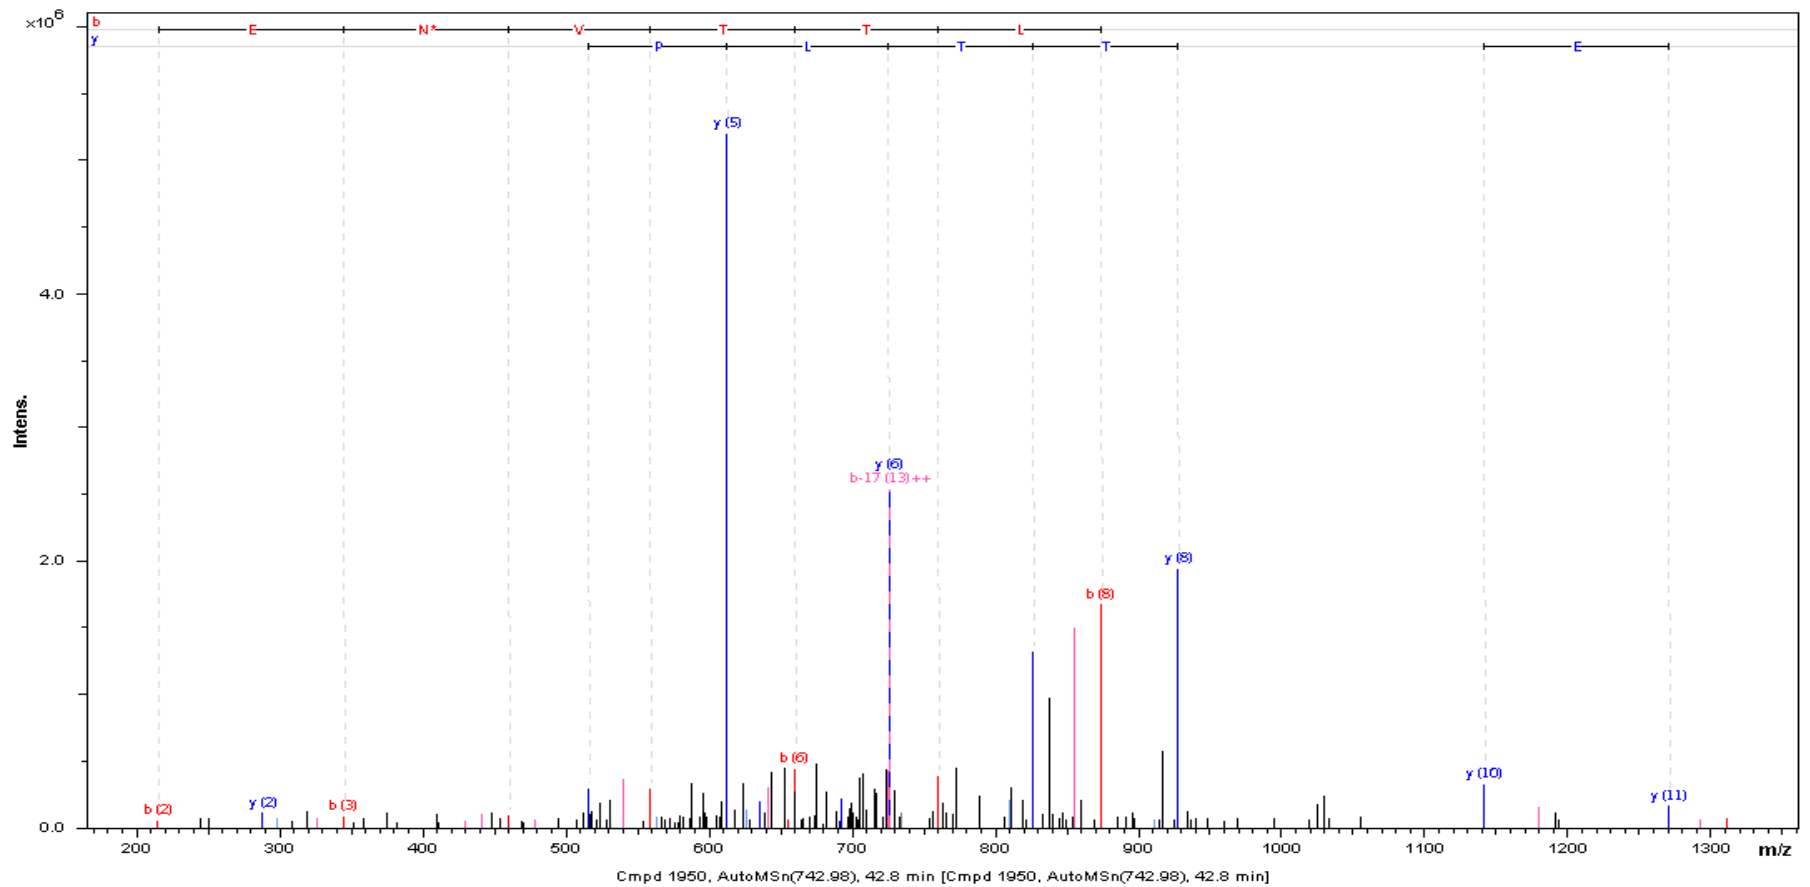

Phospholipase B1, membrane-associated

R.DNFTVVVVQPLFENVSMR.T \*

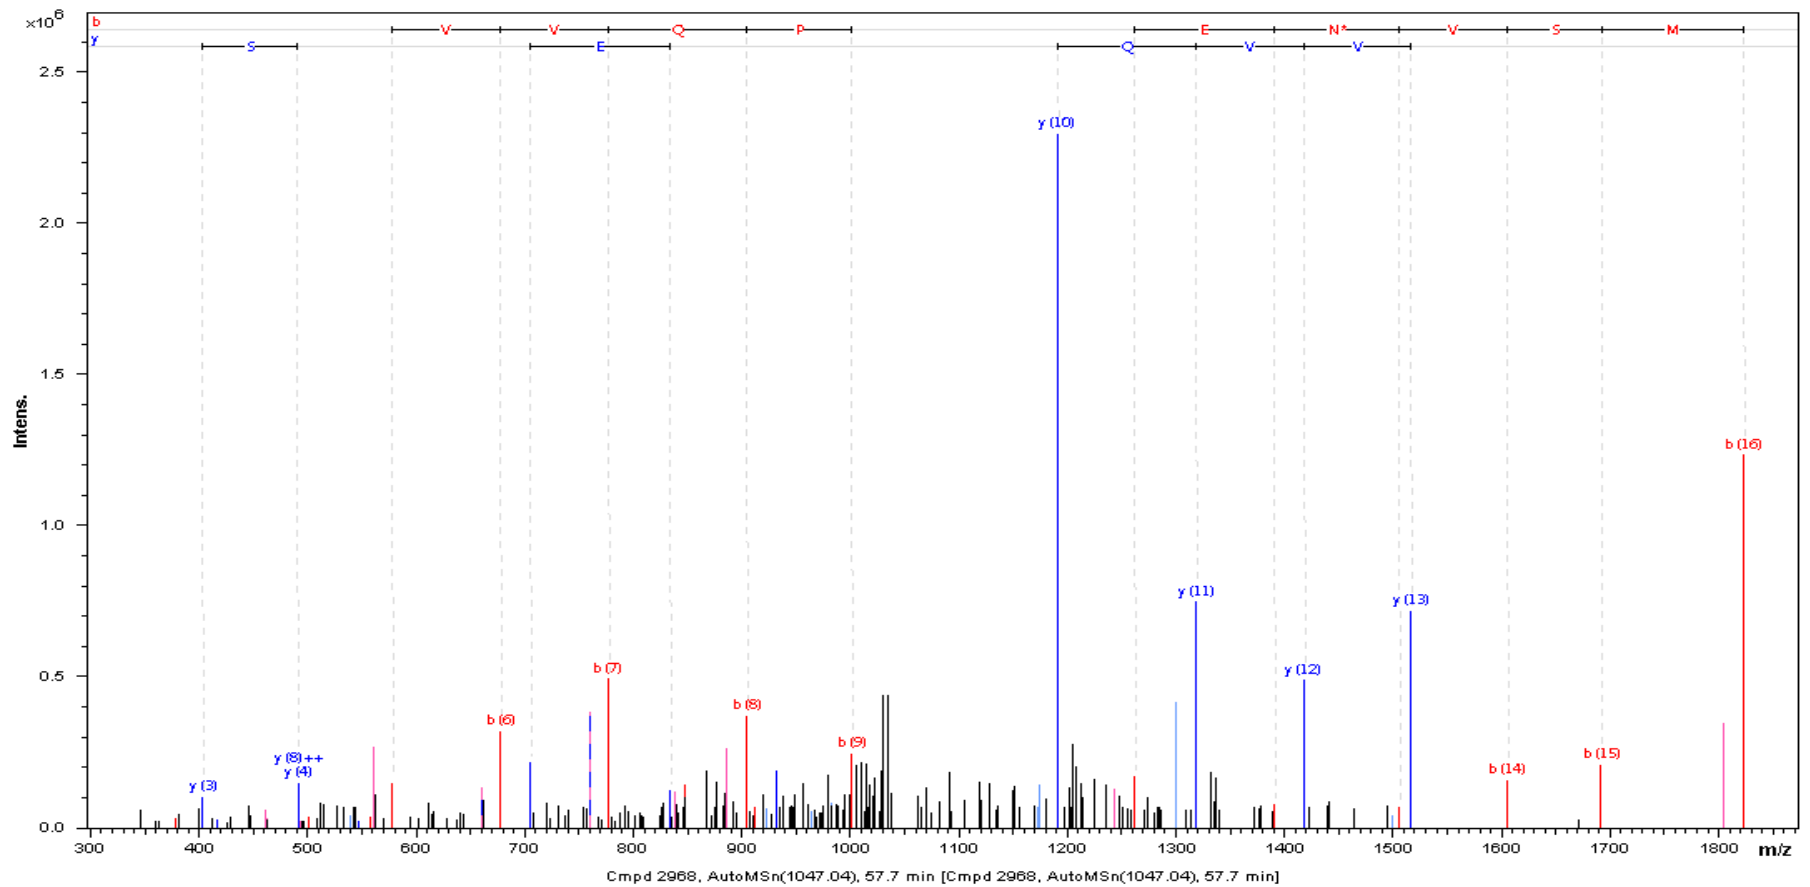



Phospholipase B1, membrane-associated

R.HSQNLTAMQELK.K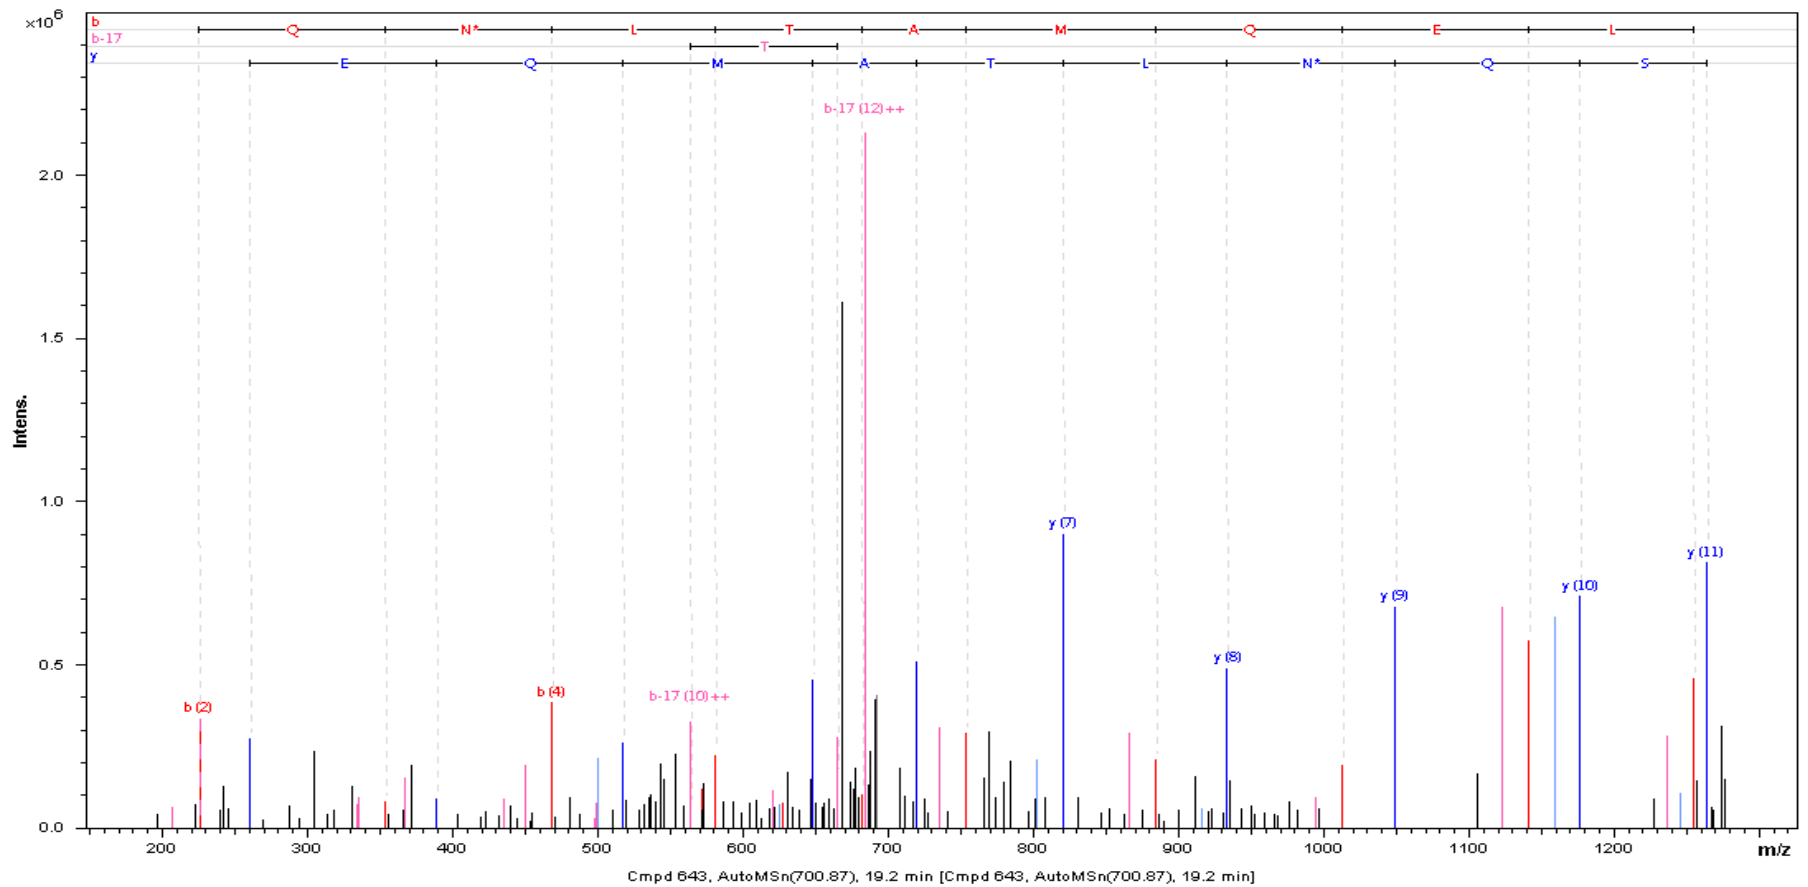

Putative phospholipase B-like 1

R.DQGNVTD<sup>+</sup>MASK.Y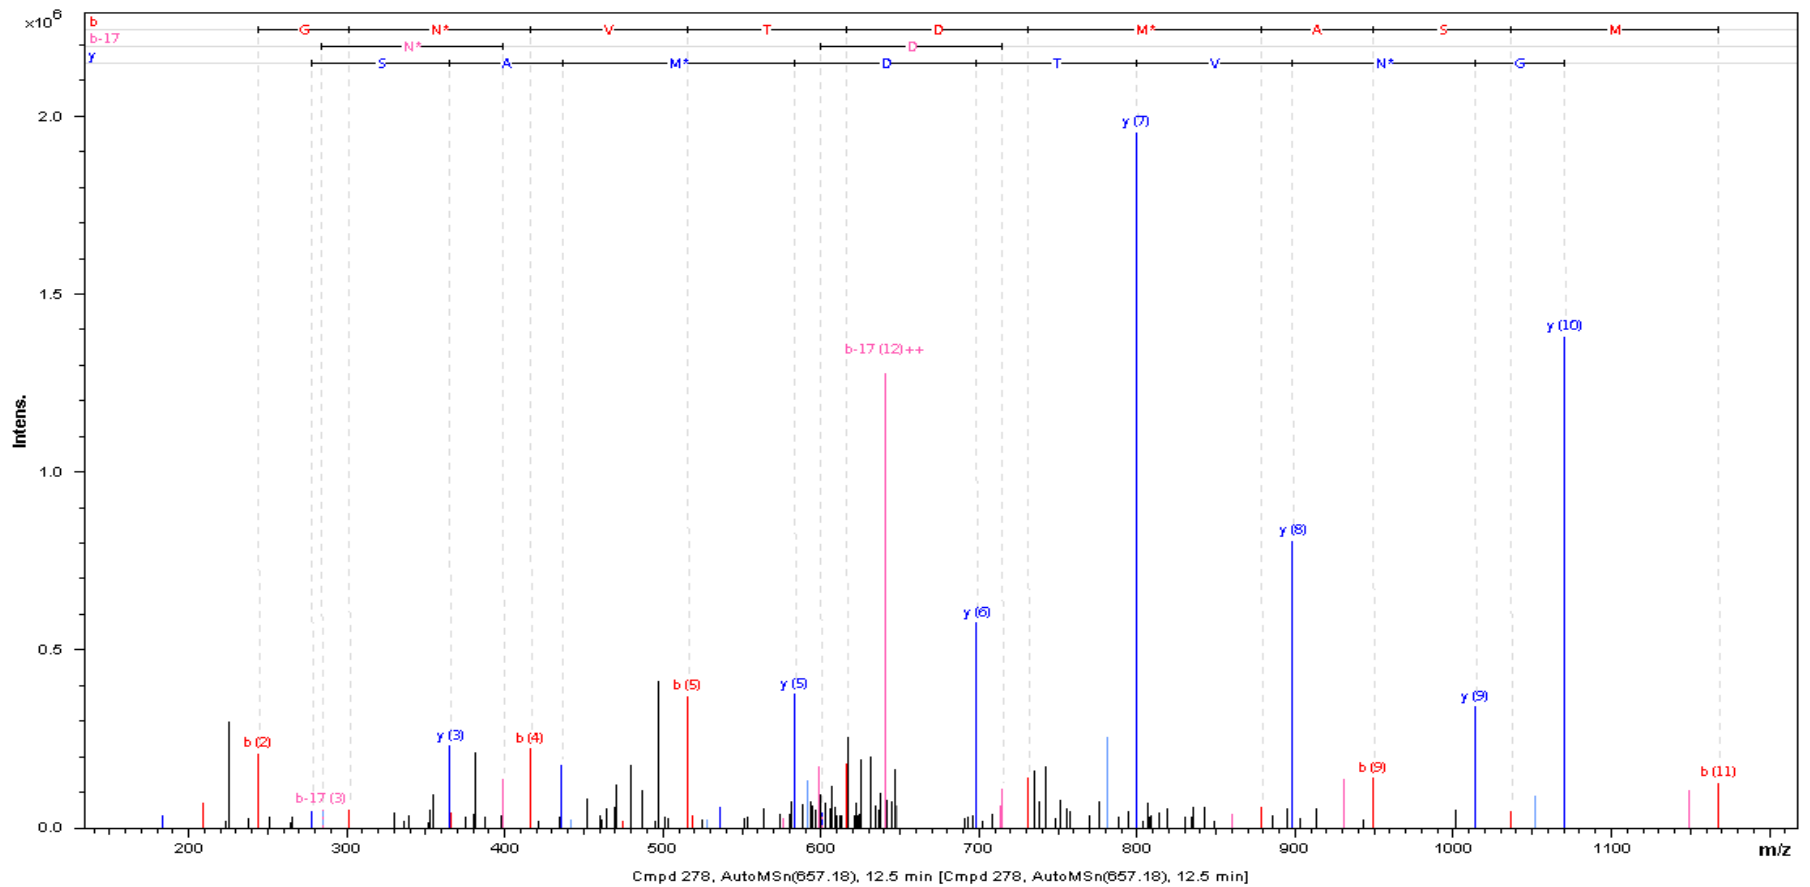

Putative phospholipase B-like 1

R.FNETLHR.G

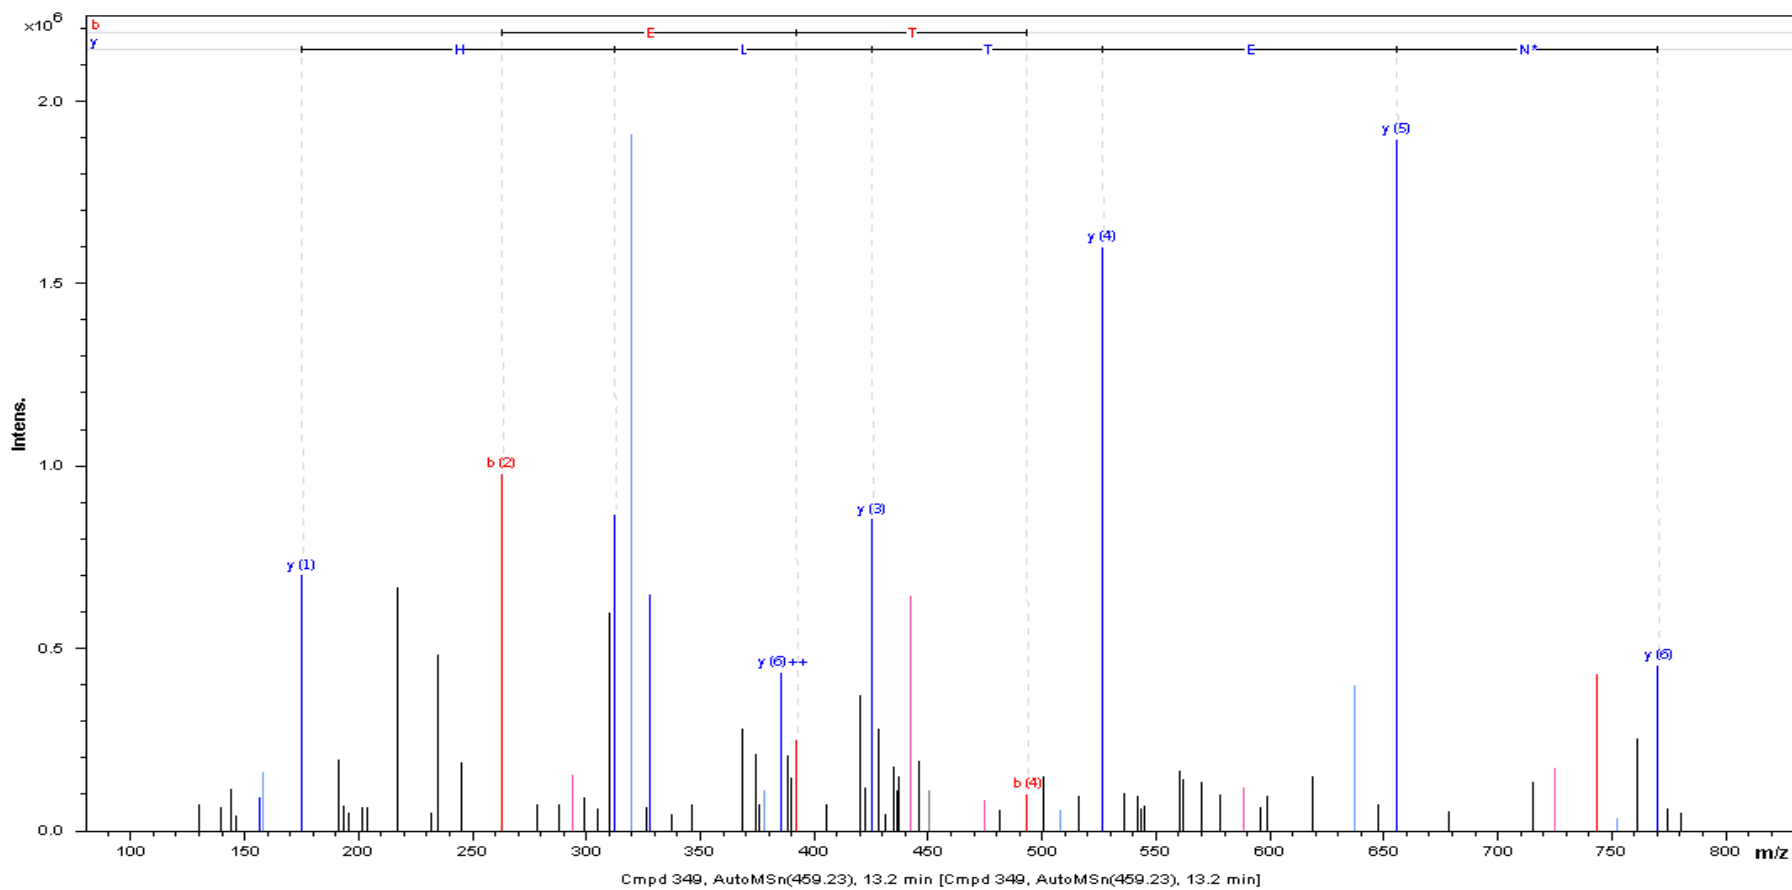

Prominin-1 precursor

K.DALQNMSSSLK.S

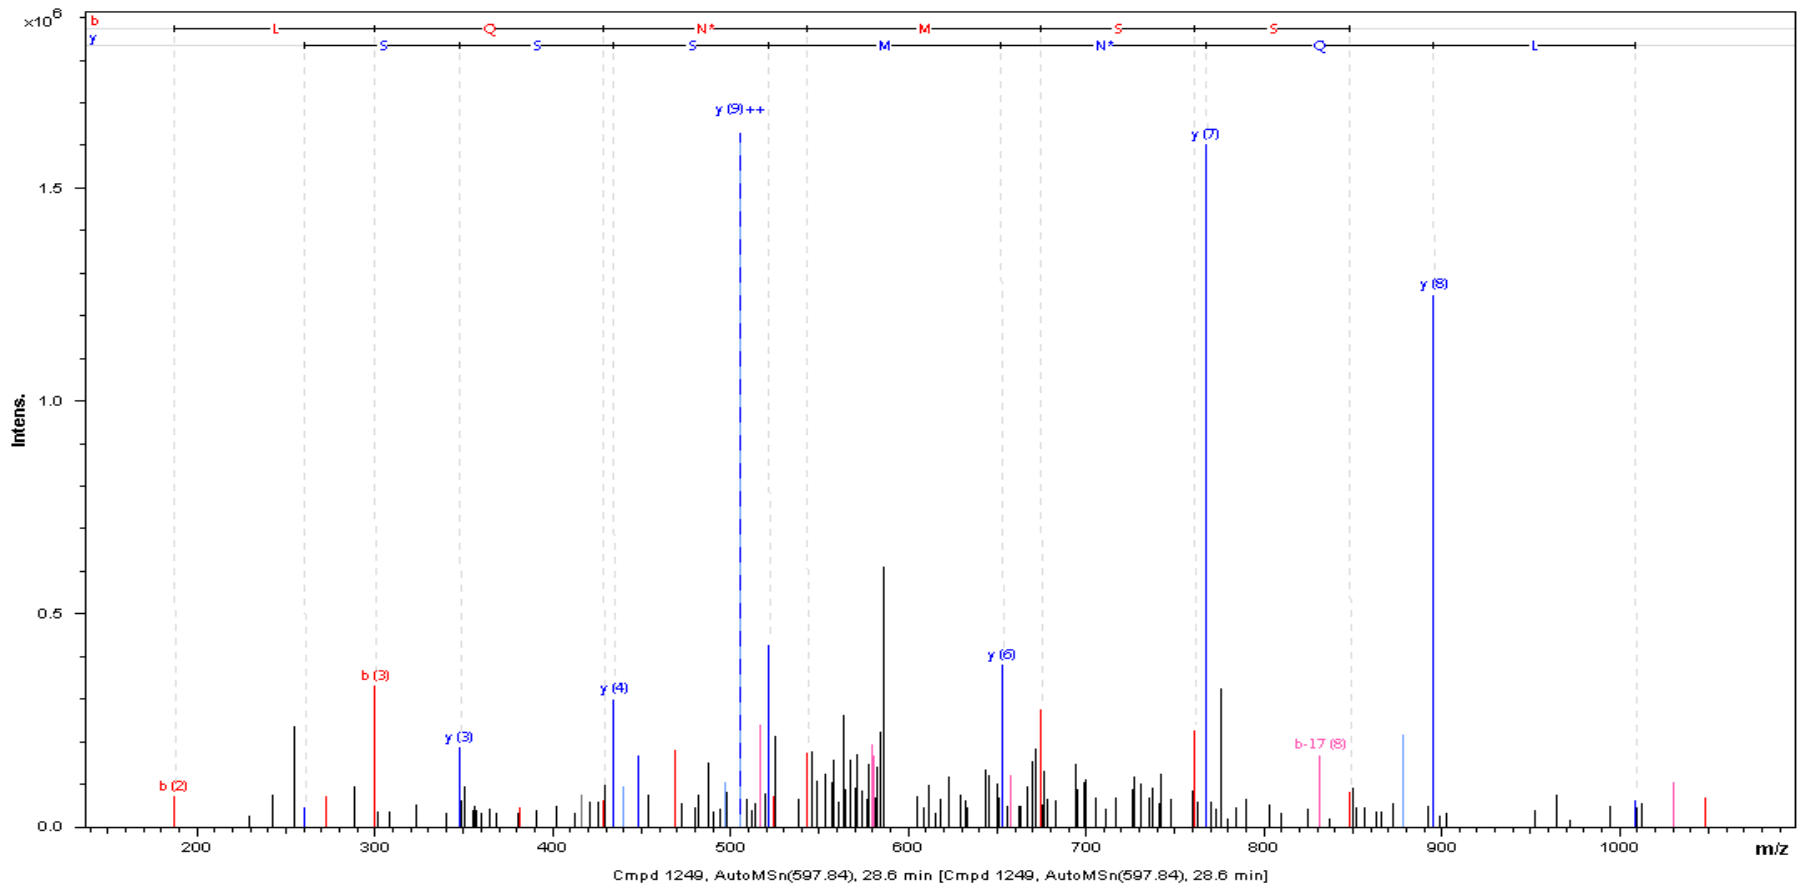

Prominin-1 precursor

K.SLQDAATQLNTNLSSVR.N

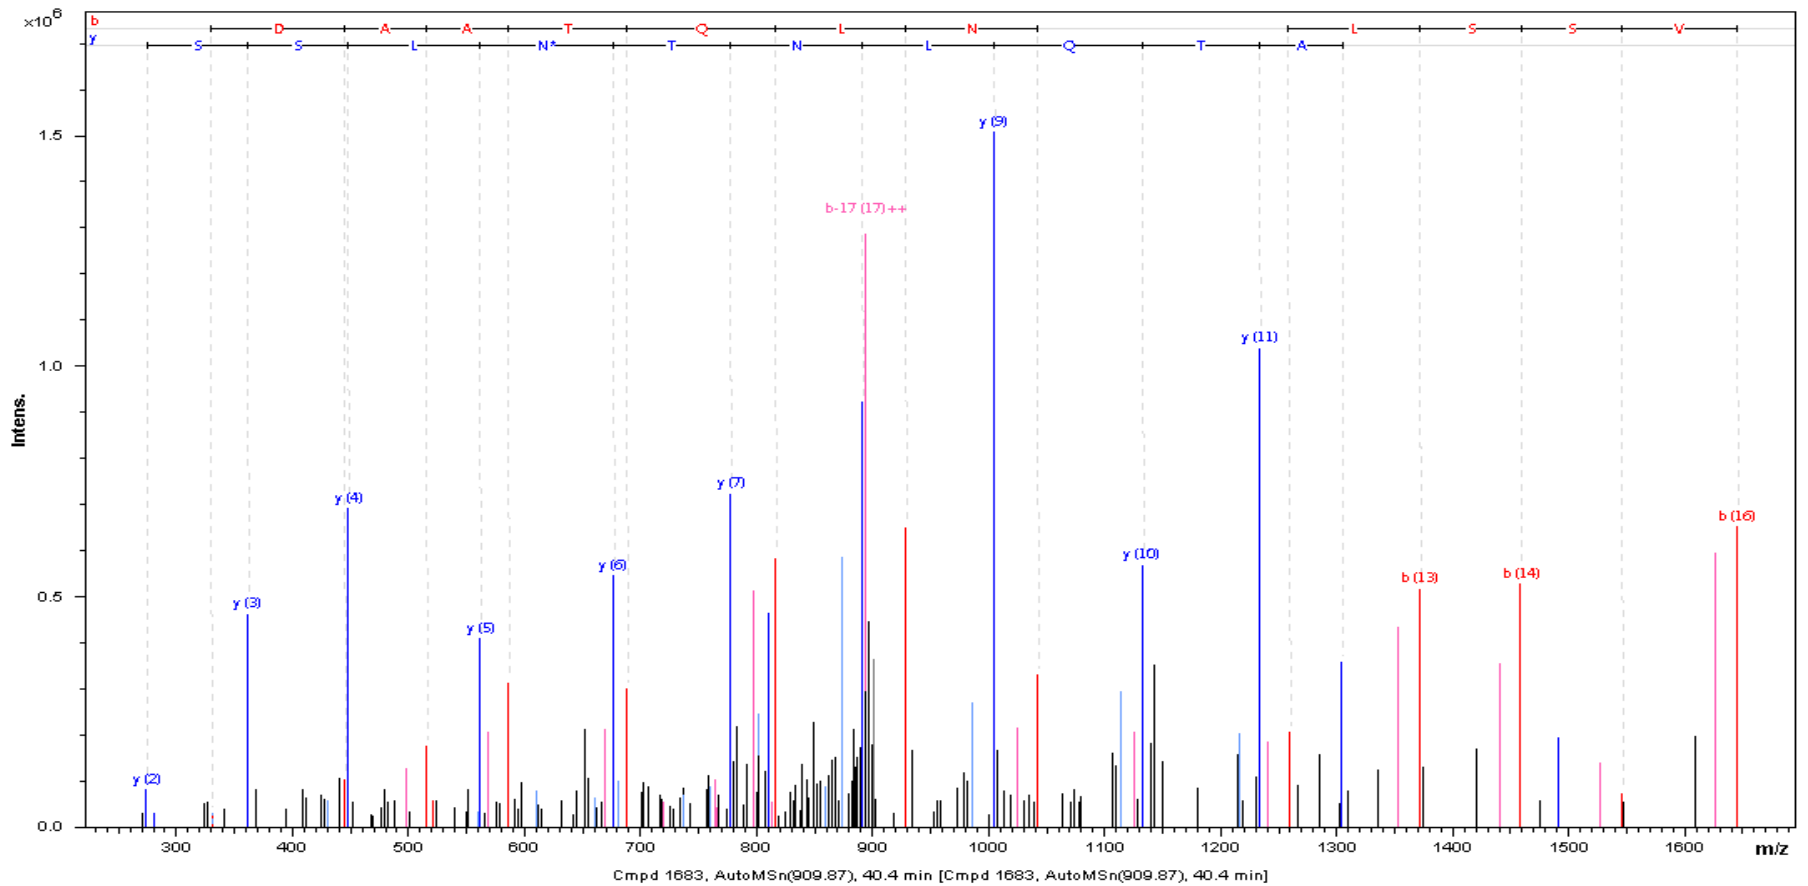

Inactive serine protease 39

R.ILLGYNQLSNPSNYSR.Q

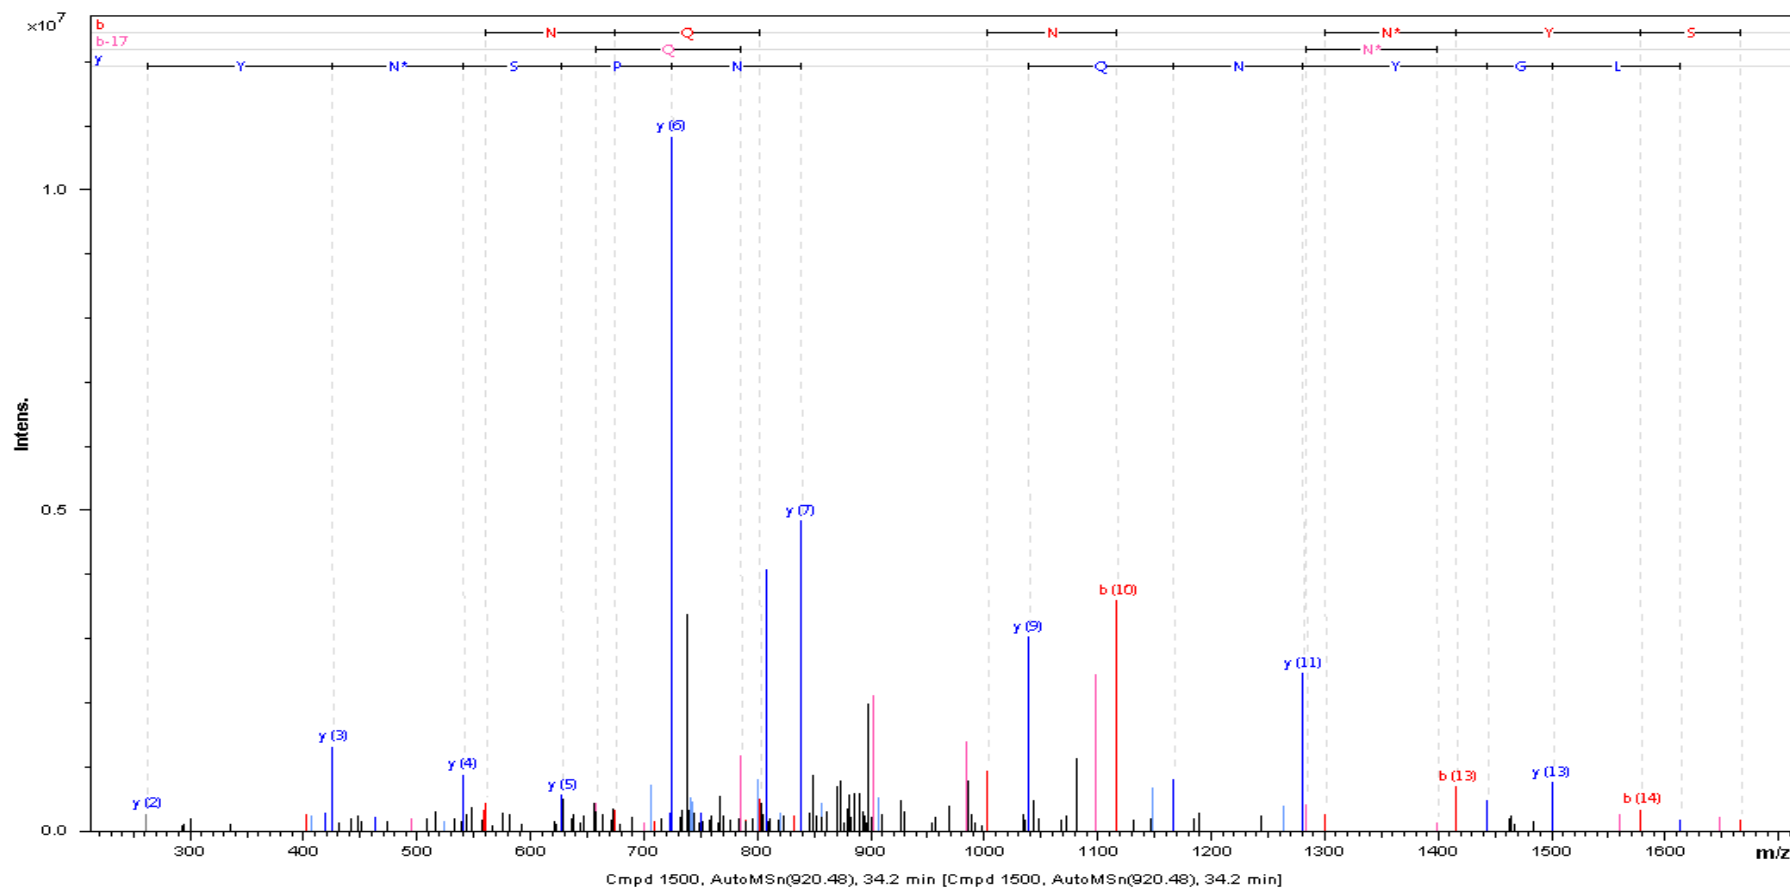

Serine protease 42

K.LQHPVNFTTNIYPVCIPSESPVK.A \*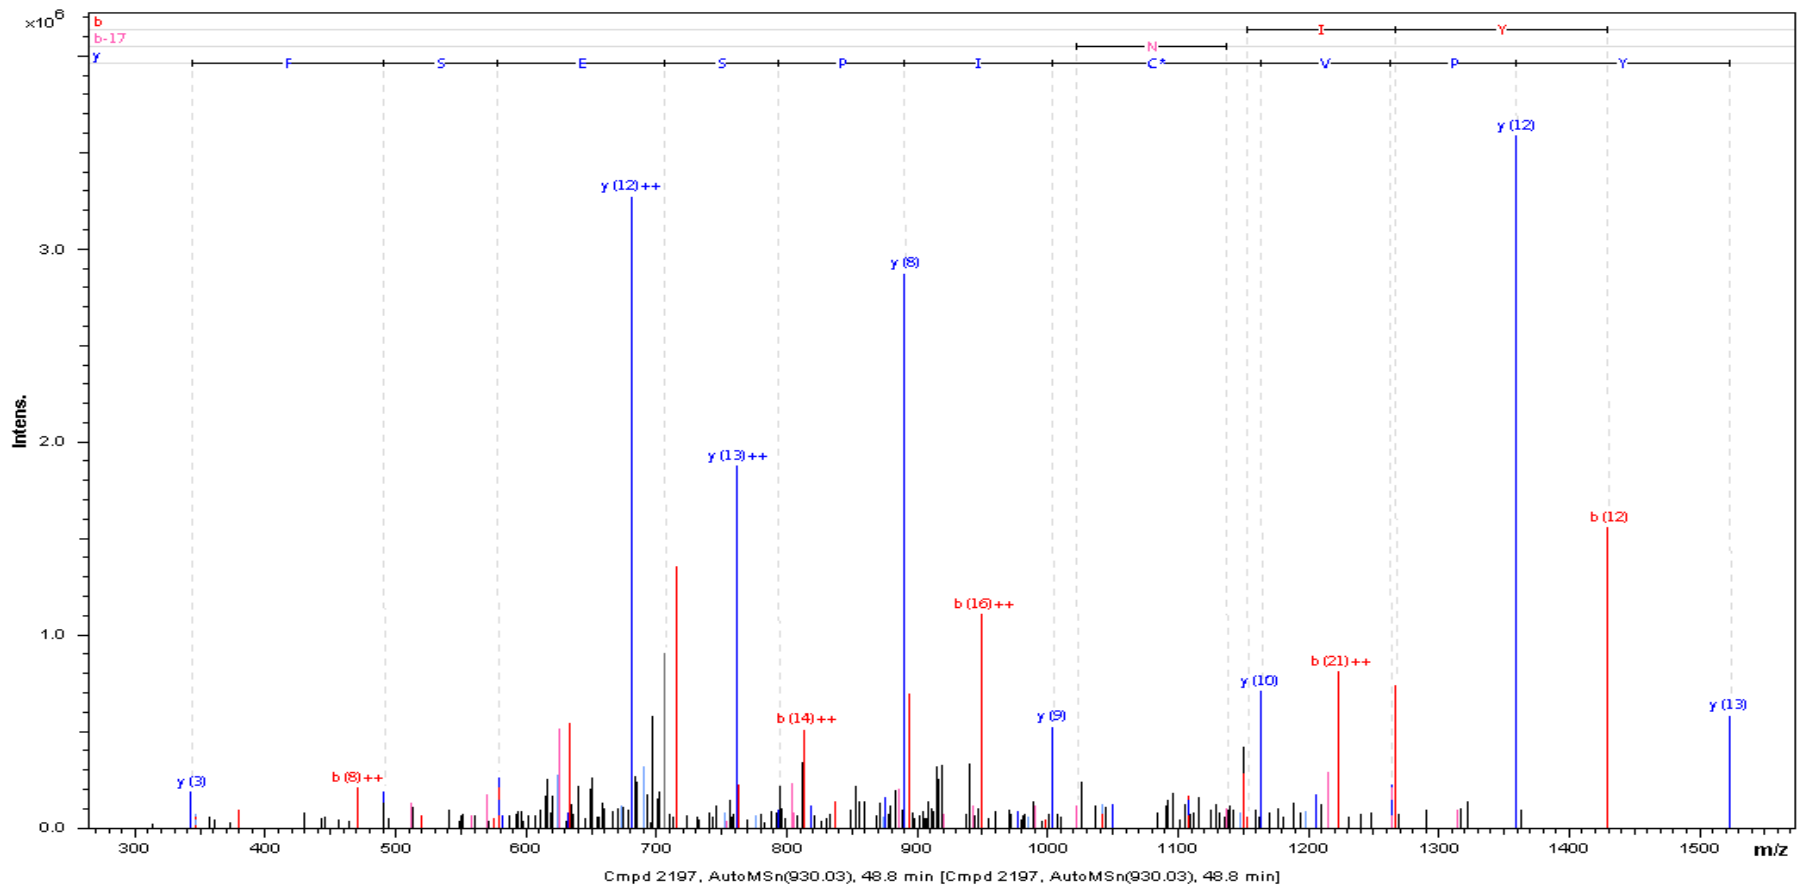

Serine protease 44

K.GGDACQGDSGGPLVCFENK.T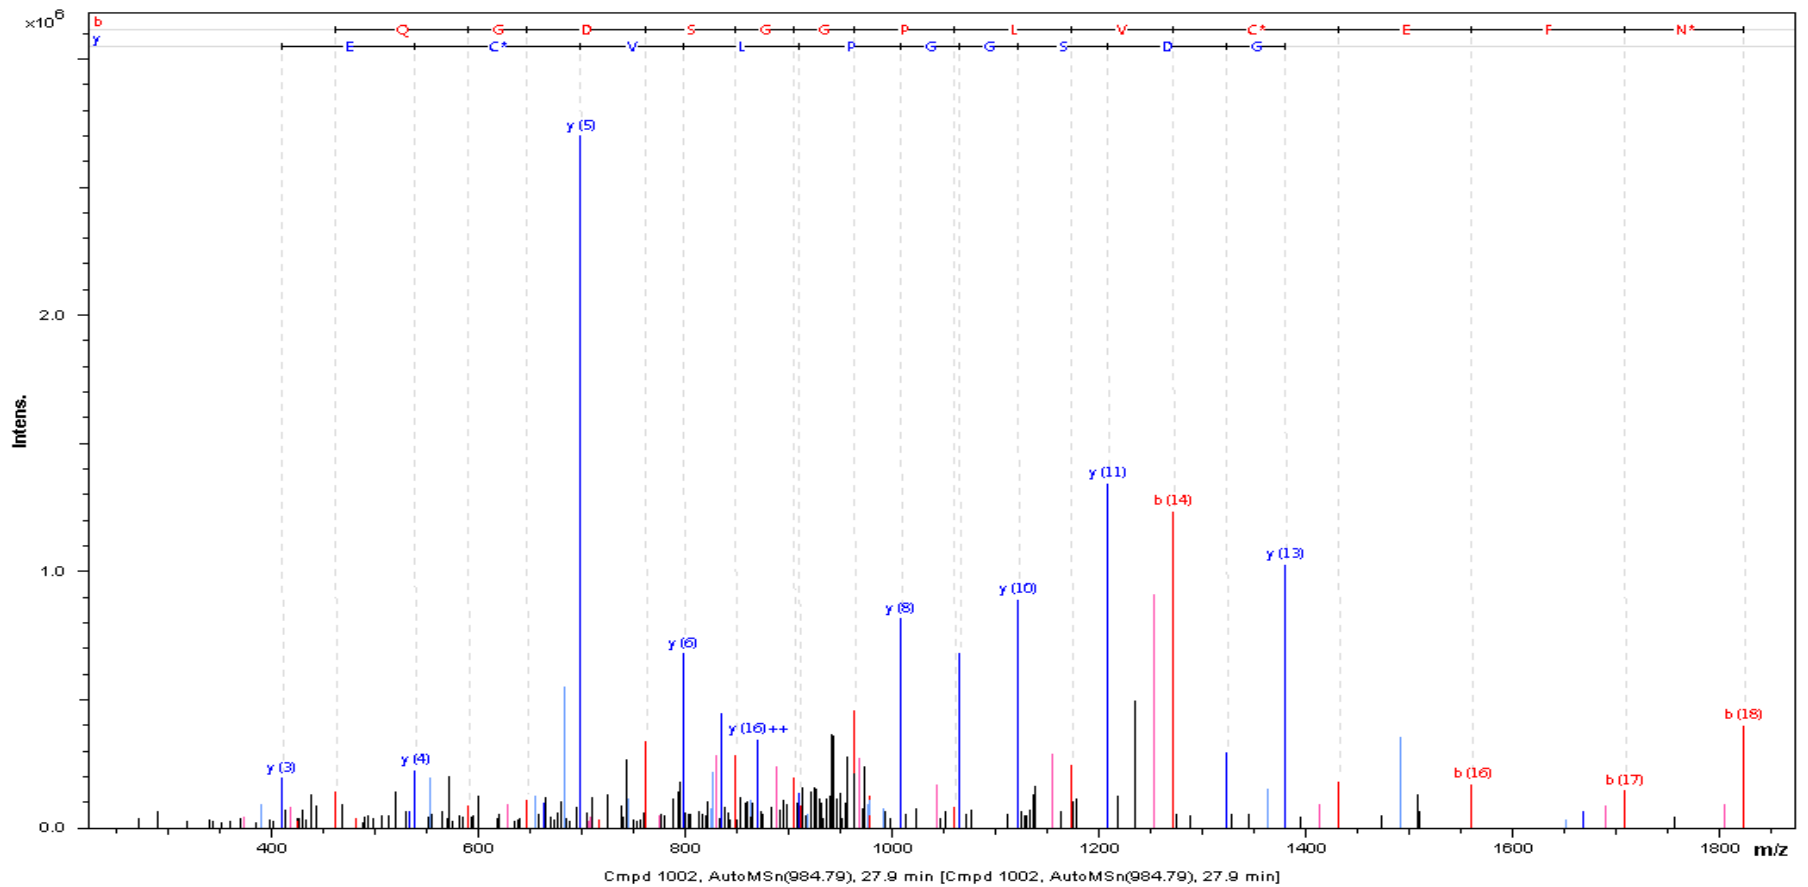



Serine protease 46

K.VGVQTLPDNSTSELLVTR.I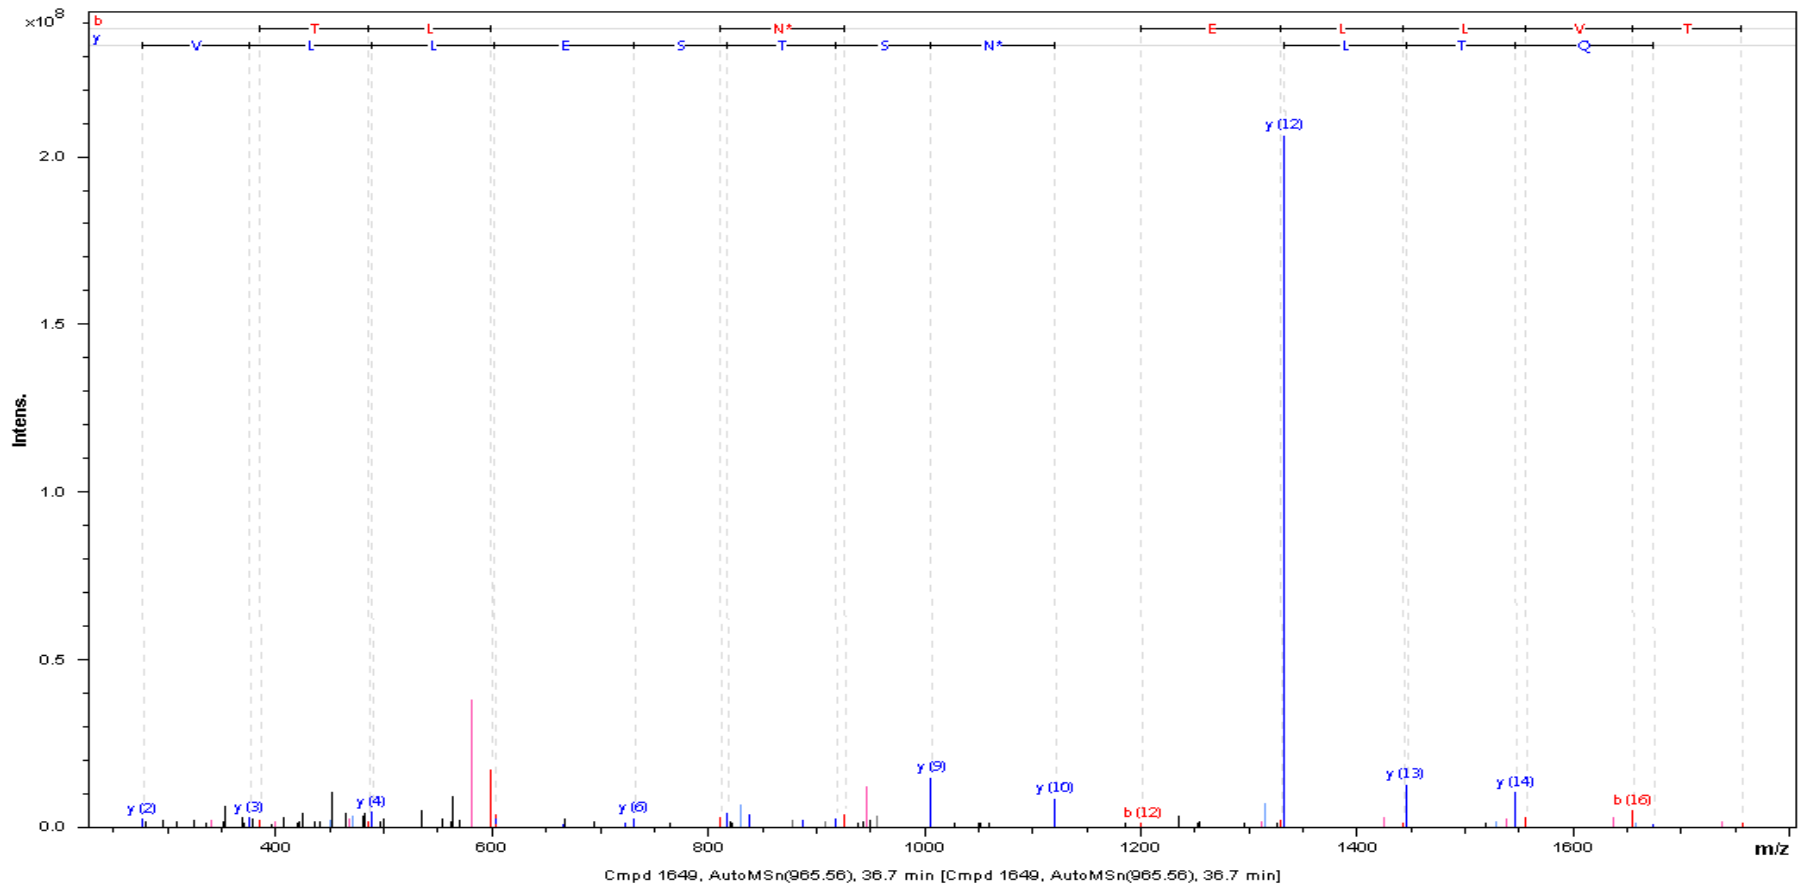

Serine protease 52

R.NCWVTGWGITNTSEK.G

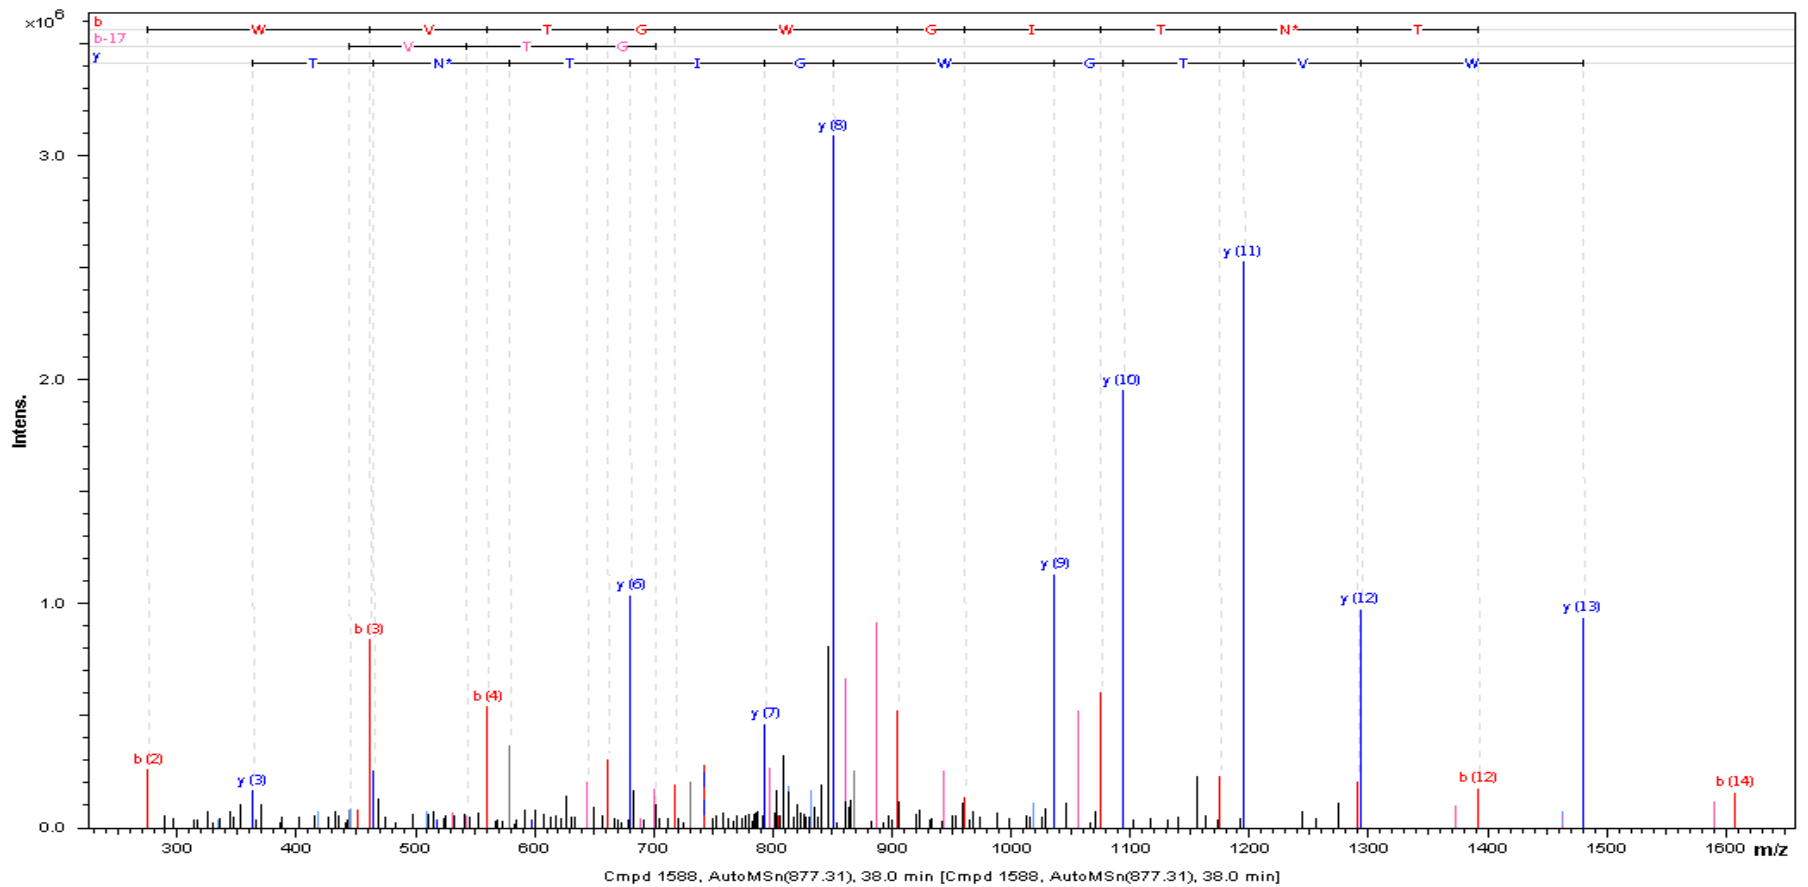

Prostaglandin-H2 D-isomerase precursor

K.TVVAPSTEGGLNLTSTFLR.K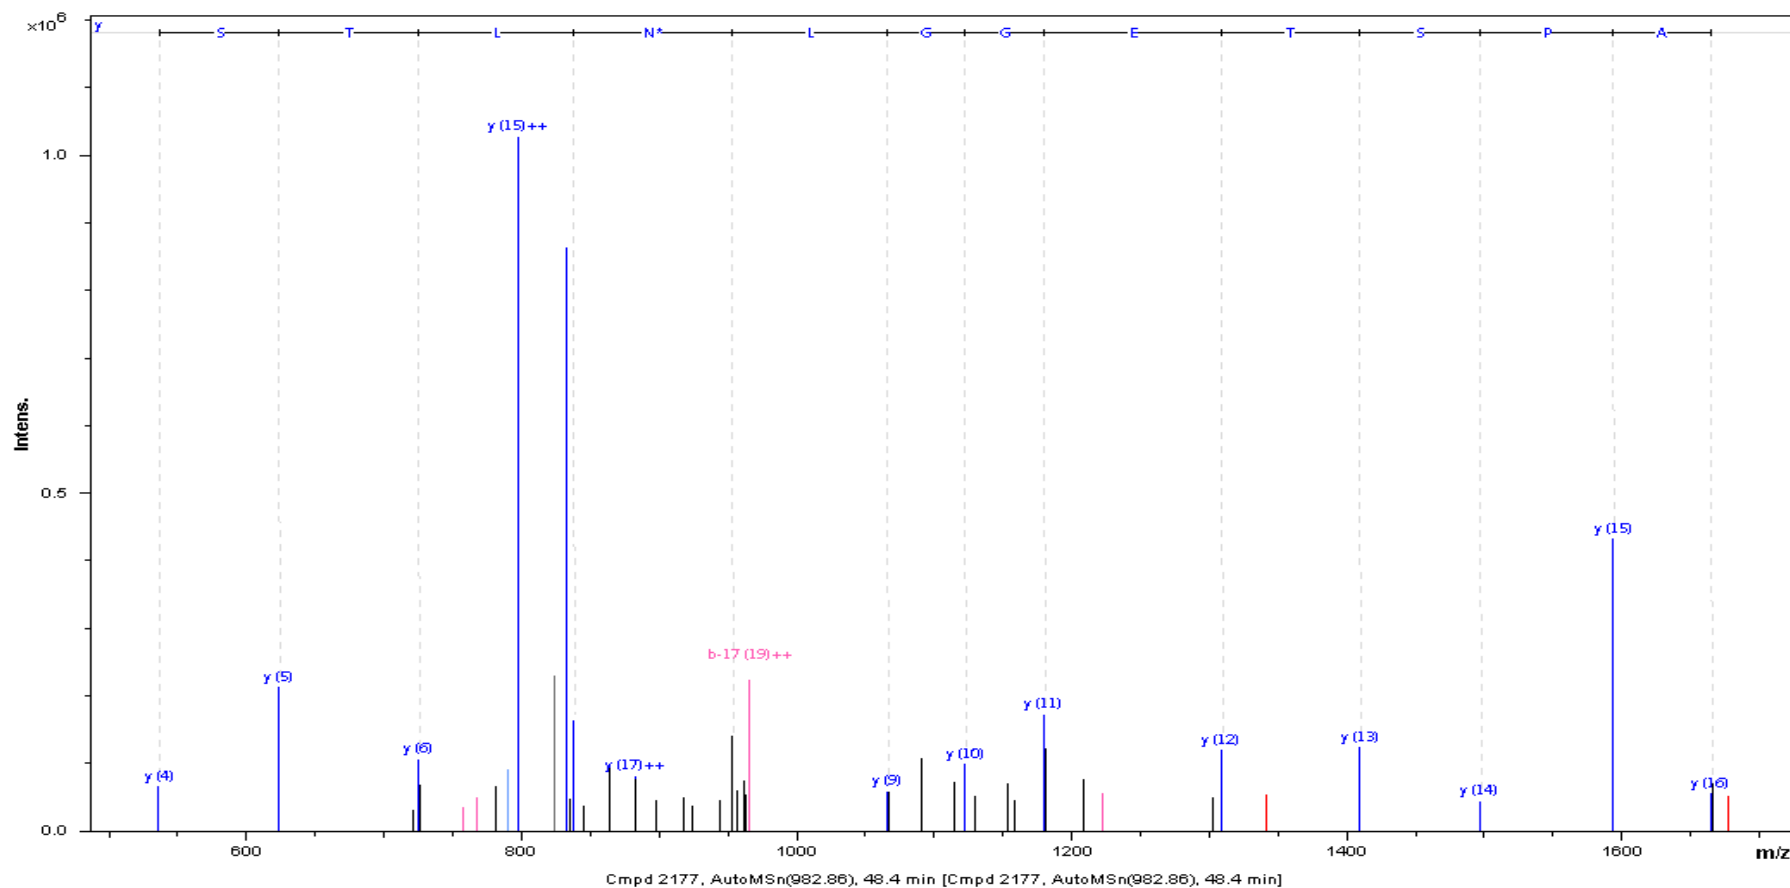

Patched domain-containing protein 3

K.VVQENGTQILYQEVCAK.Y

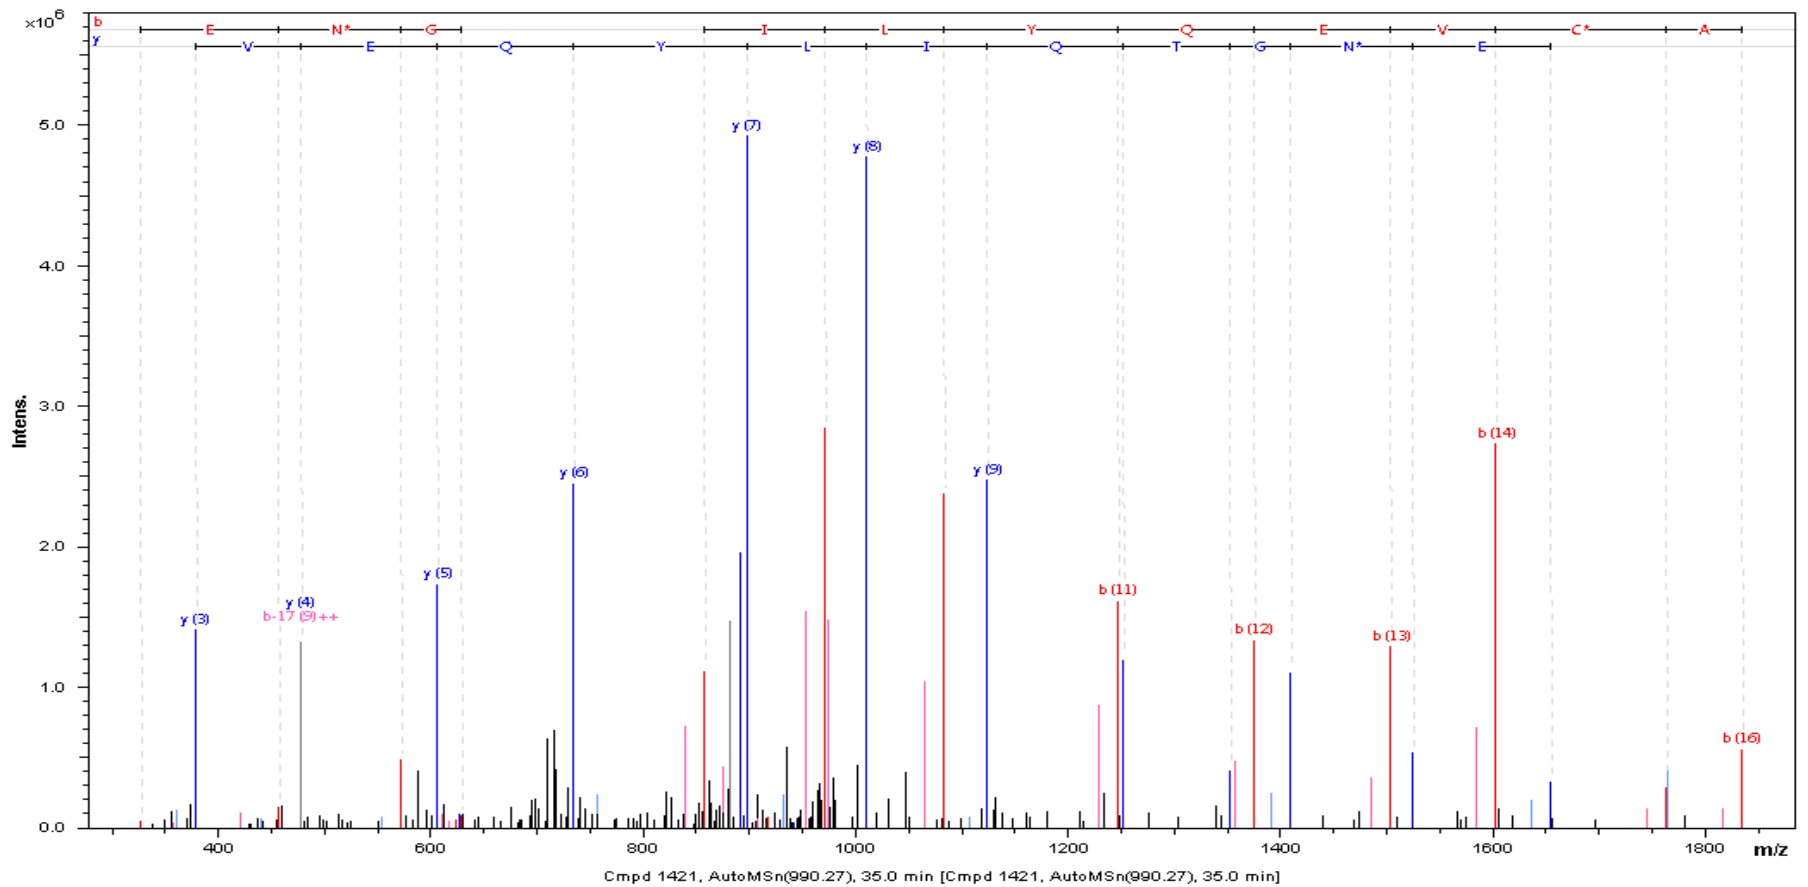

Patched domain-containing protein 3

R.FVQGHFSTNDTYR.F

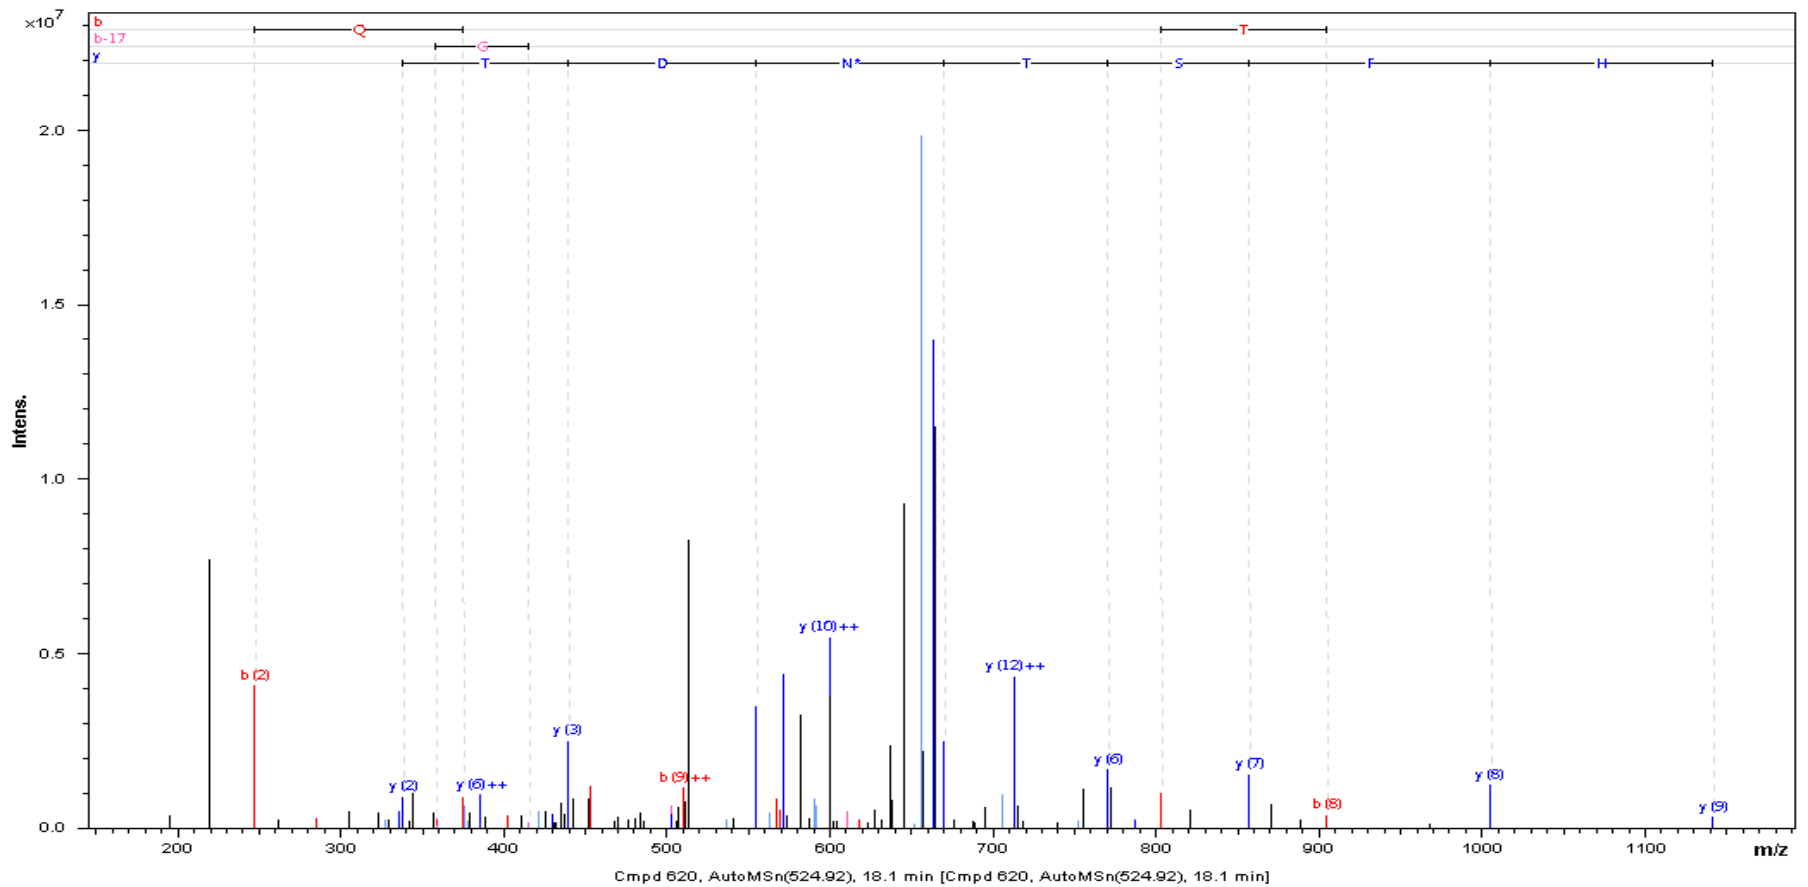

Pituitary tumor-transforming gene 1 protein-interacting protein precursor

R.VGCSEYTNR.S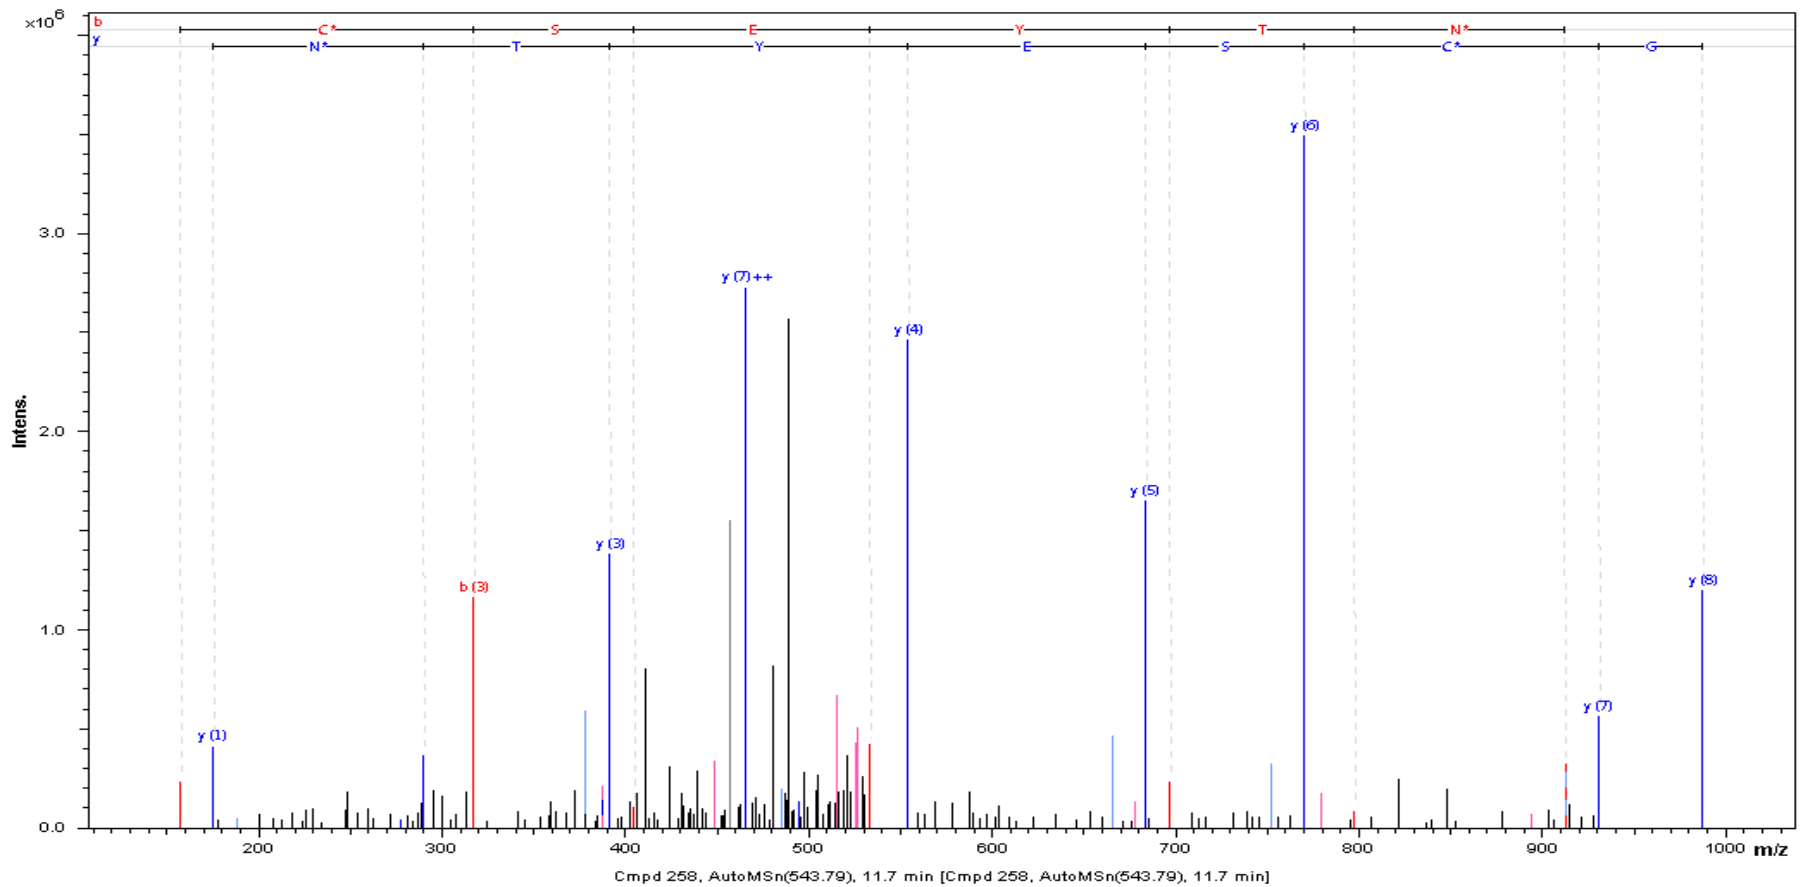

RING finger protein 126

R.NTENGSAPSTAPTDQNR.Q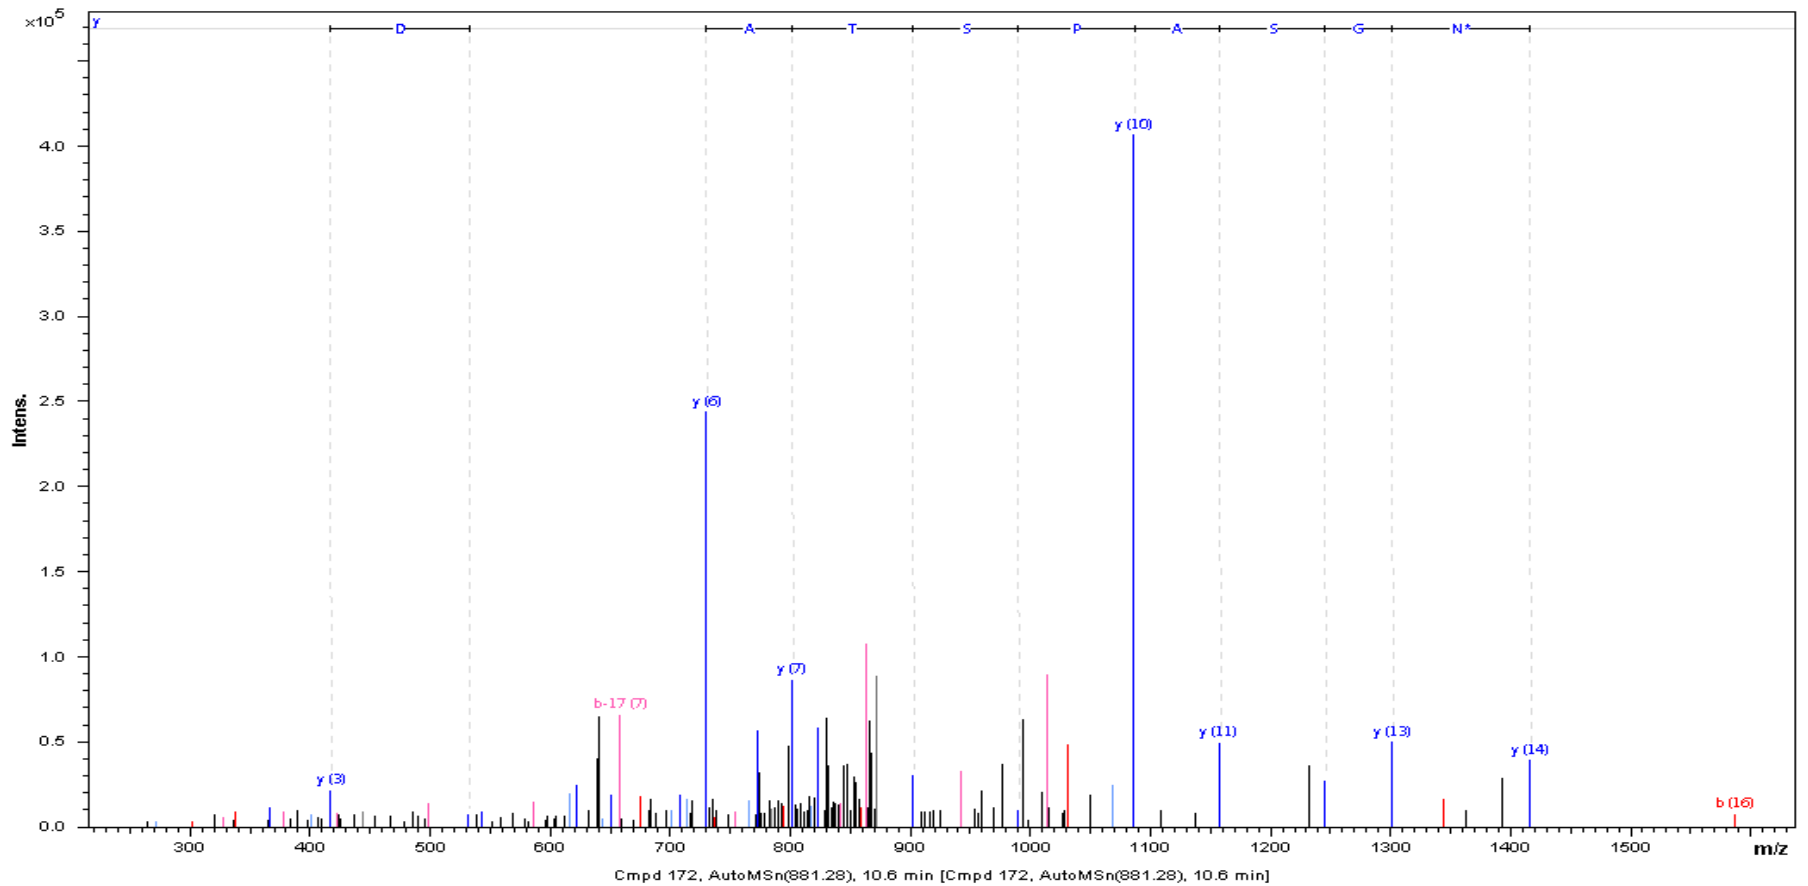

Solute carrier family 13 member 5

R.AMFNLDNFPDWANSTSVNT.-

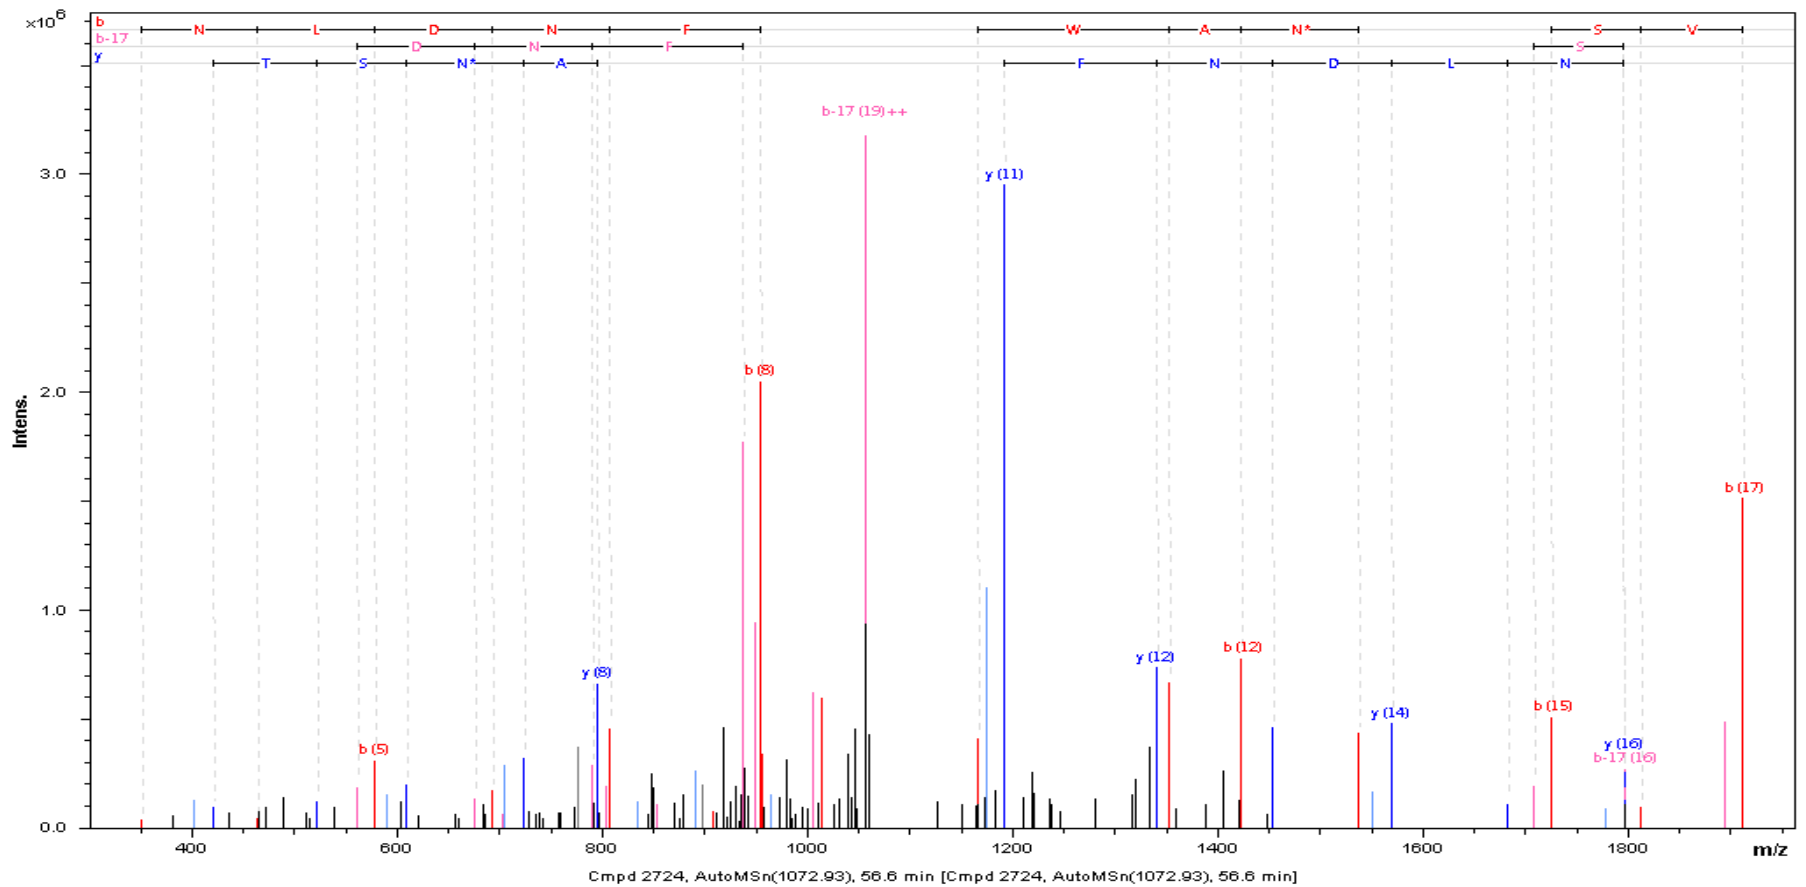



Solute carrier family 22 member 21

R.IPDTVNLSSAWR.N

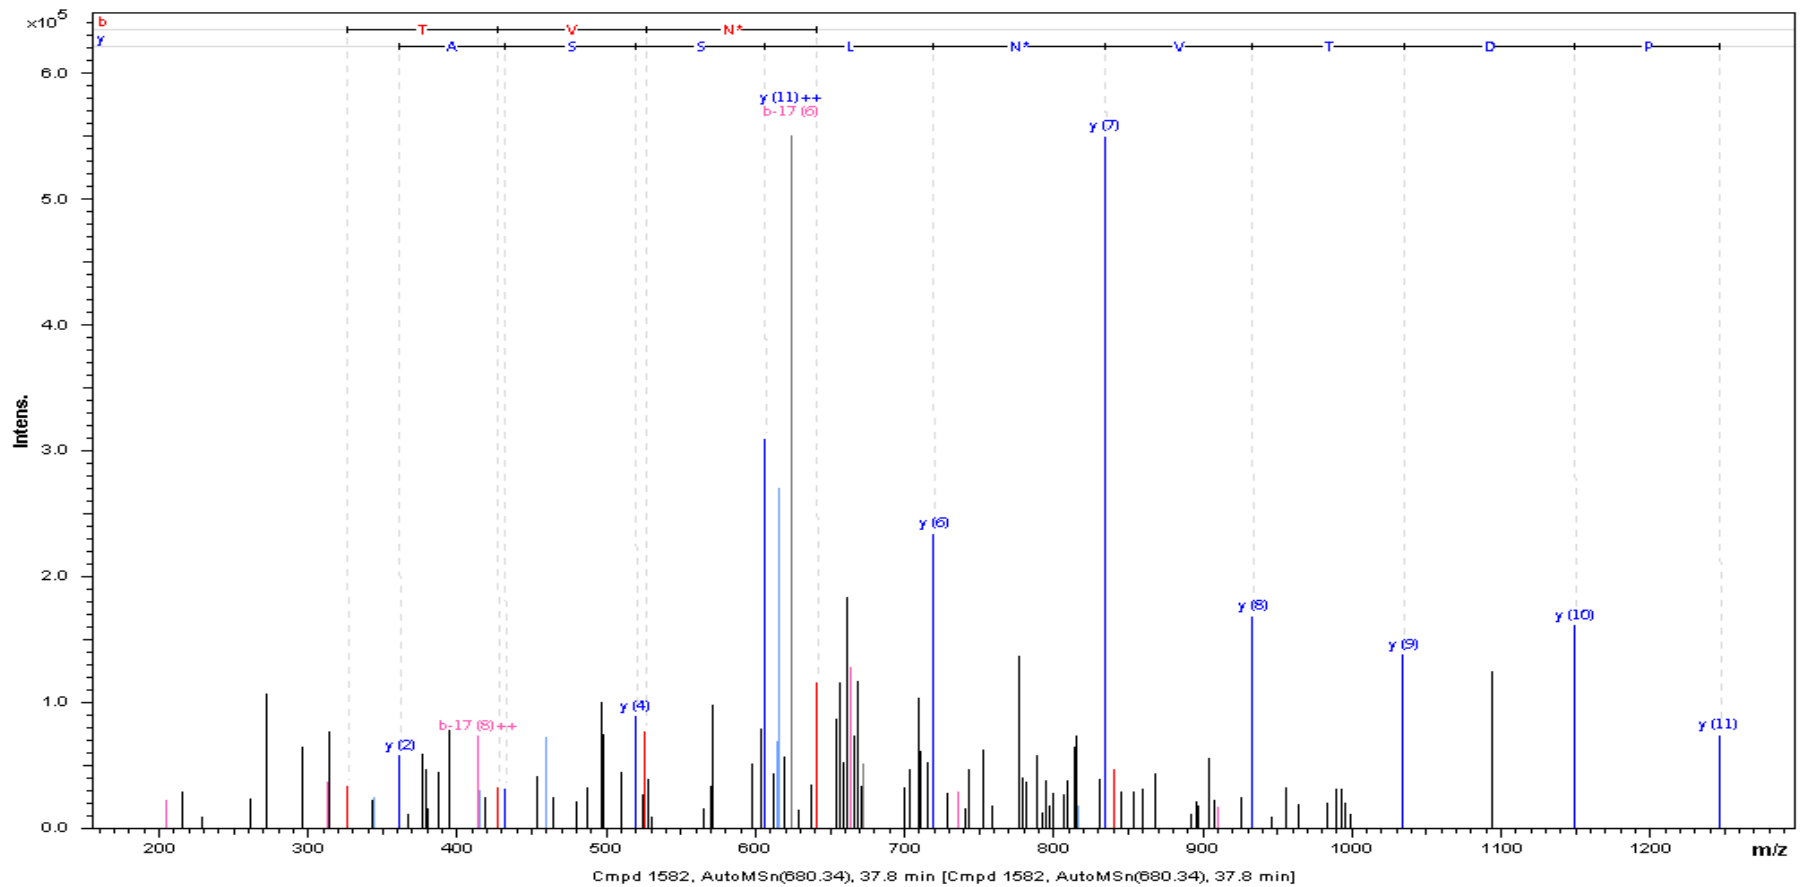

Solute carrier family 22 member 21

R.LATIANFSELGLEPGR.D

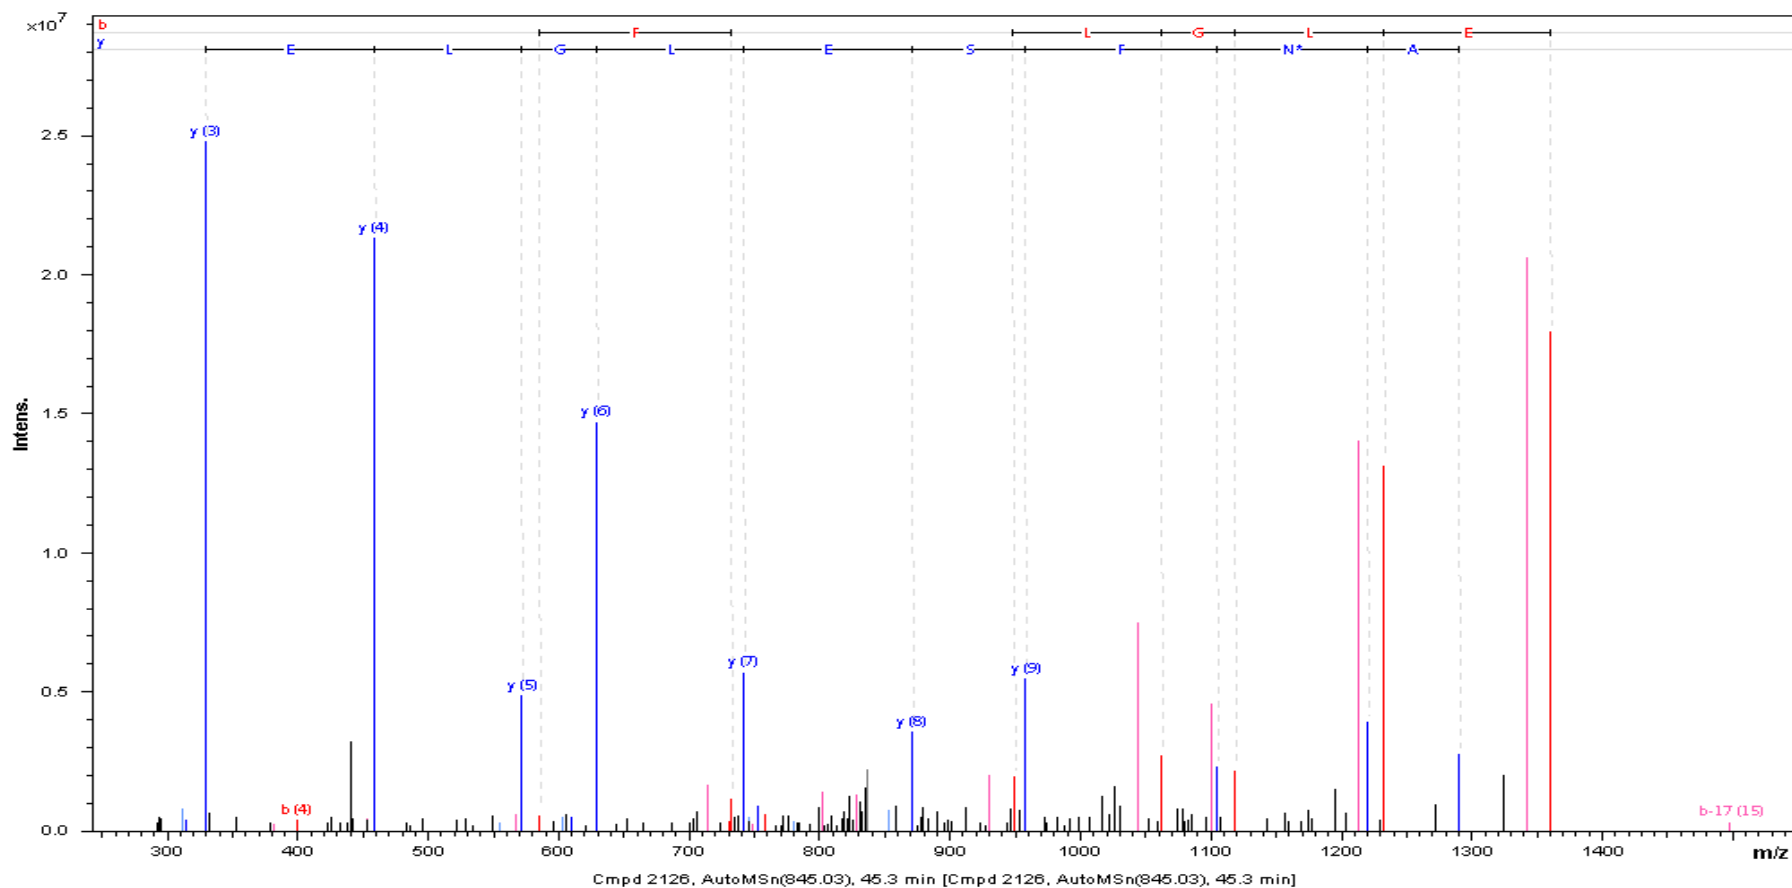

Sperm acrosome membrane-associated protein 1 precursor

K.LLKPDQQPVILTNDSAVLEITR.E

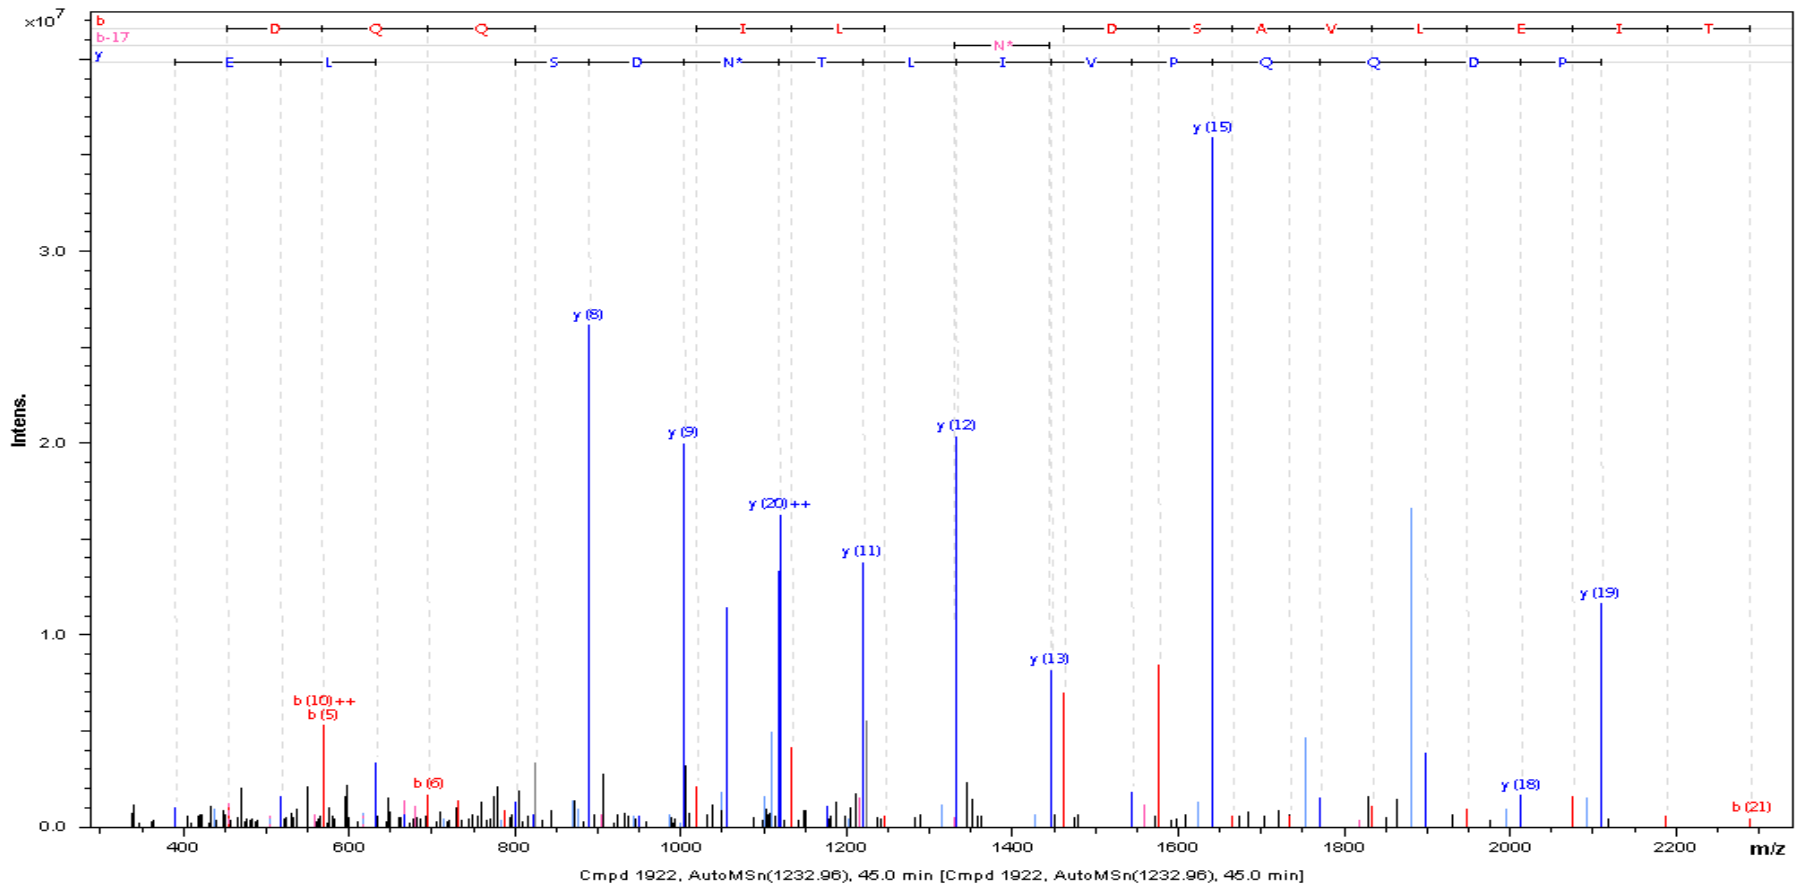

Saccharopine dehydrogenase-like oxidoreductase

K.ACIENGTSCIDICGEPQFLELMHAK.Y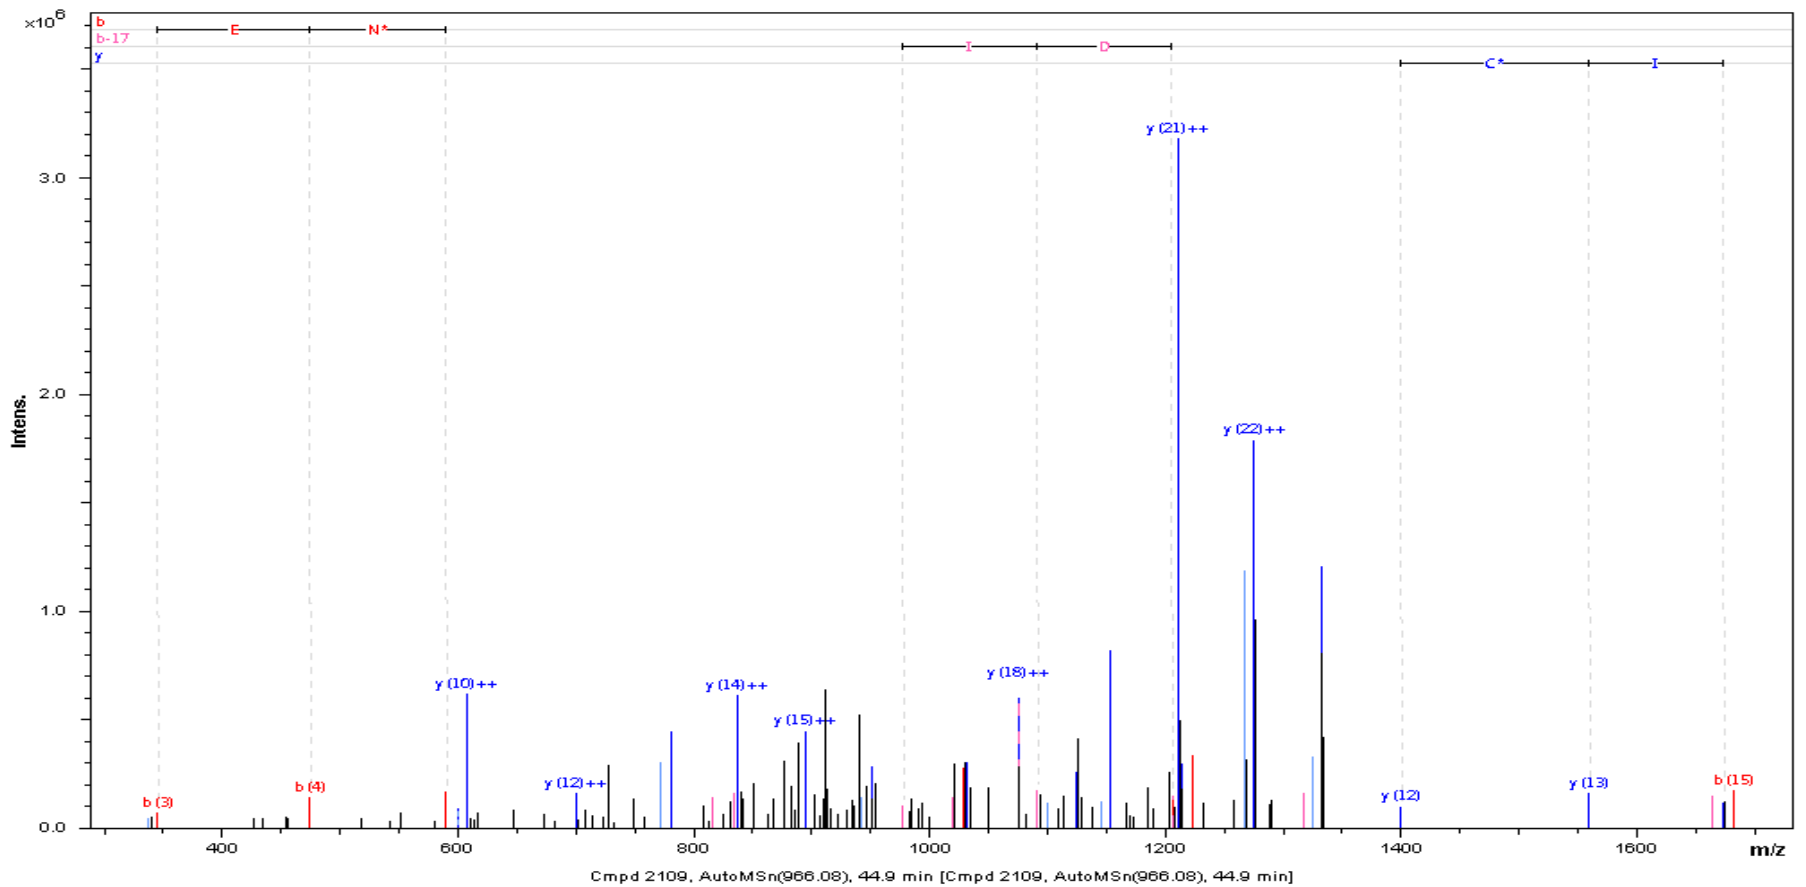

Saccharopine dehydrogenase-like oxidoreductase

R.NQMNGTLTAVESFLTINTGPEGLCIHDGTWK.S \*

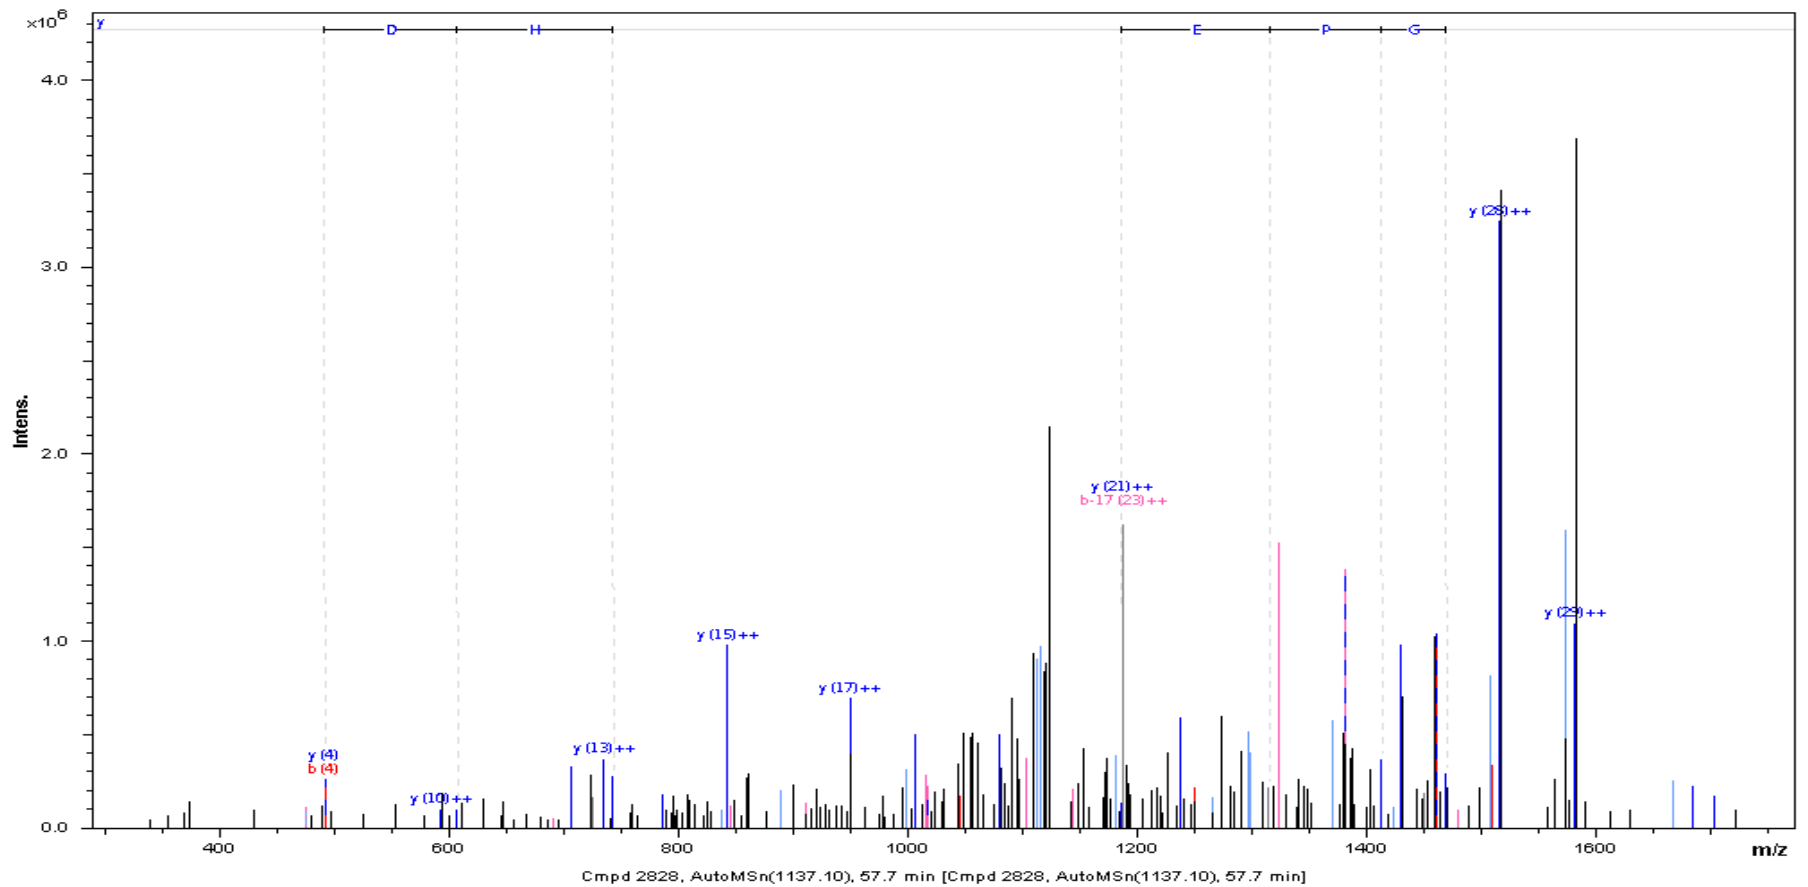

Sortilin precursor

R.HLYTTTGGETDFTNVTSLR.G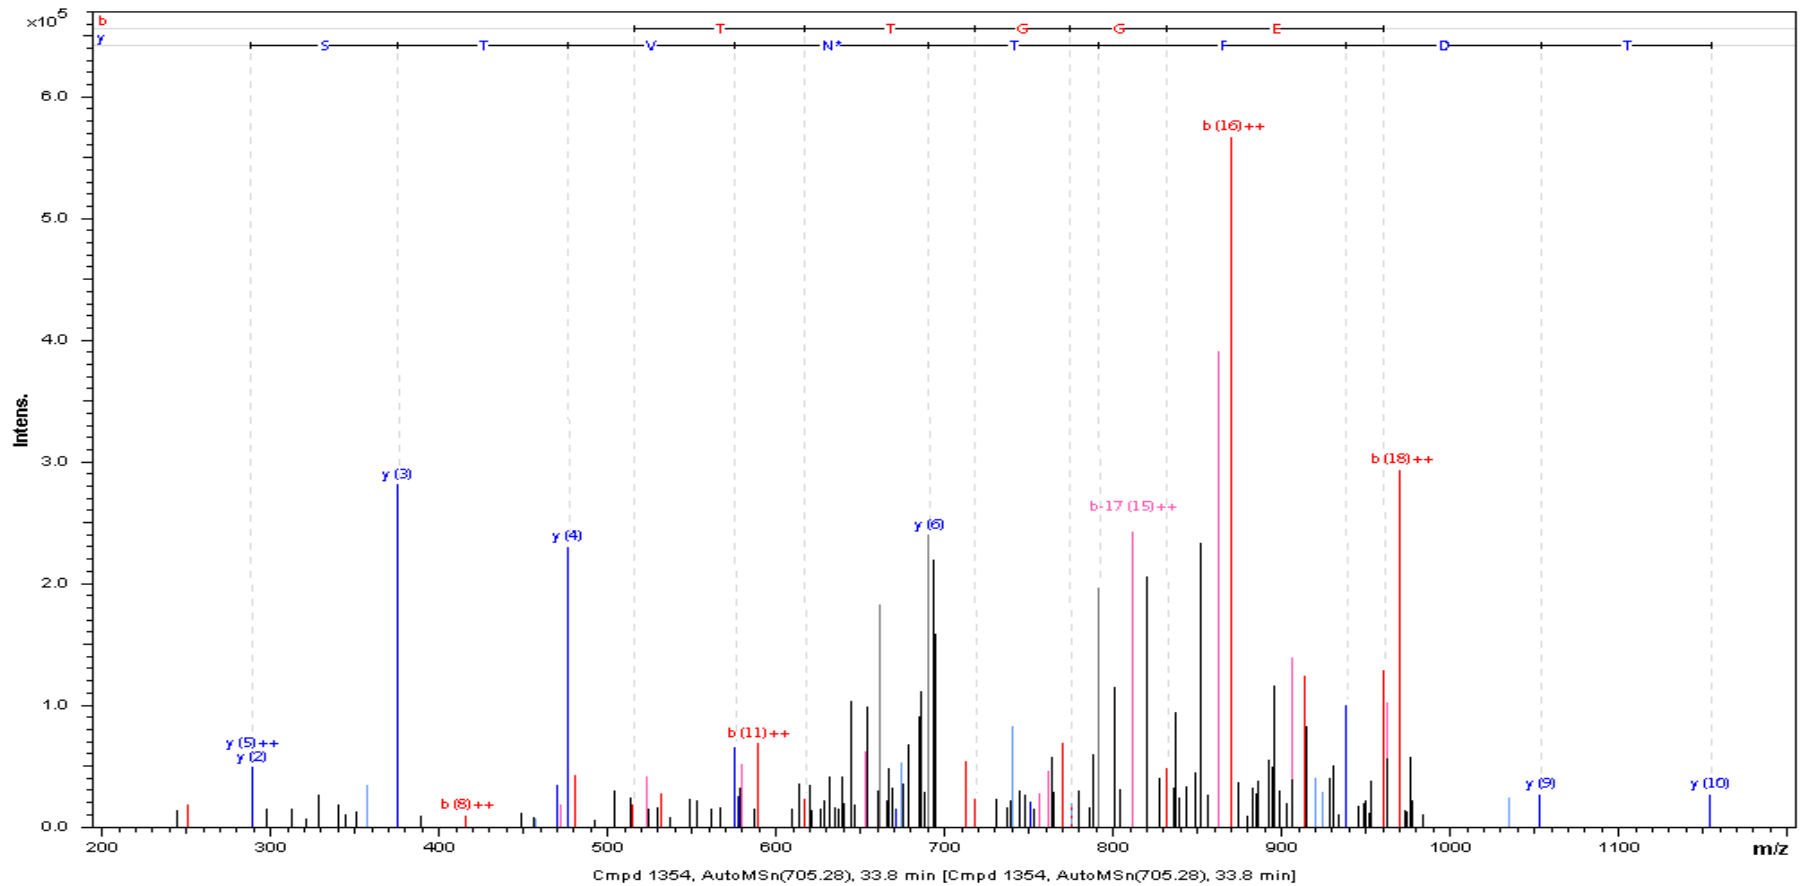

Kunitz-type protease inhibitor 4

R.FFYNQTAK.Q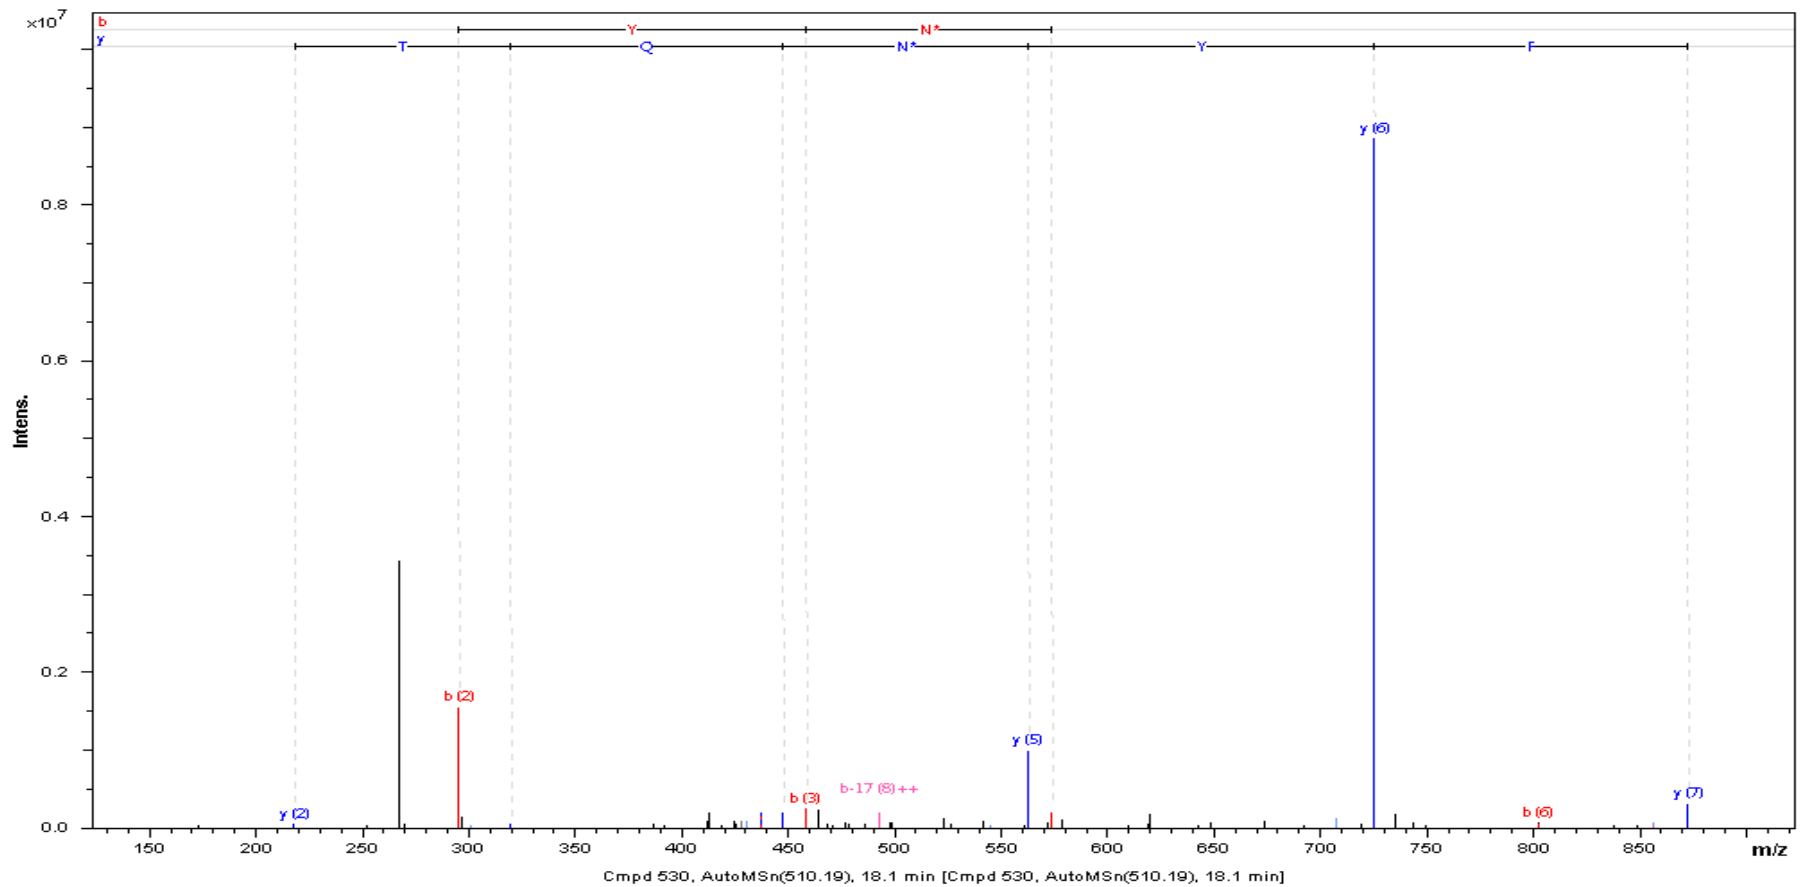

Signal peptide peptidase-like 2B

K.SGNSIMVEVATGPSNSSTHEK.L

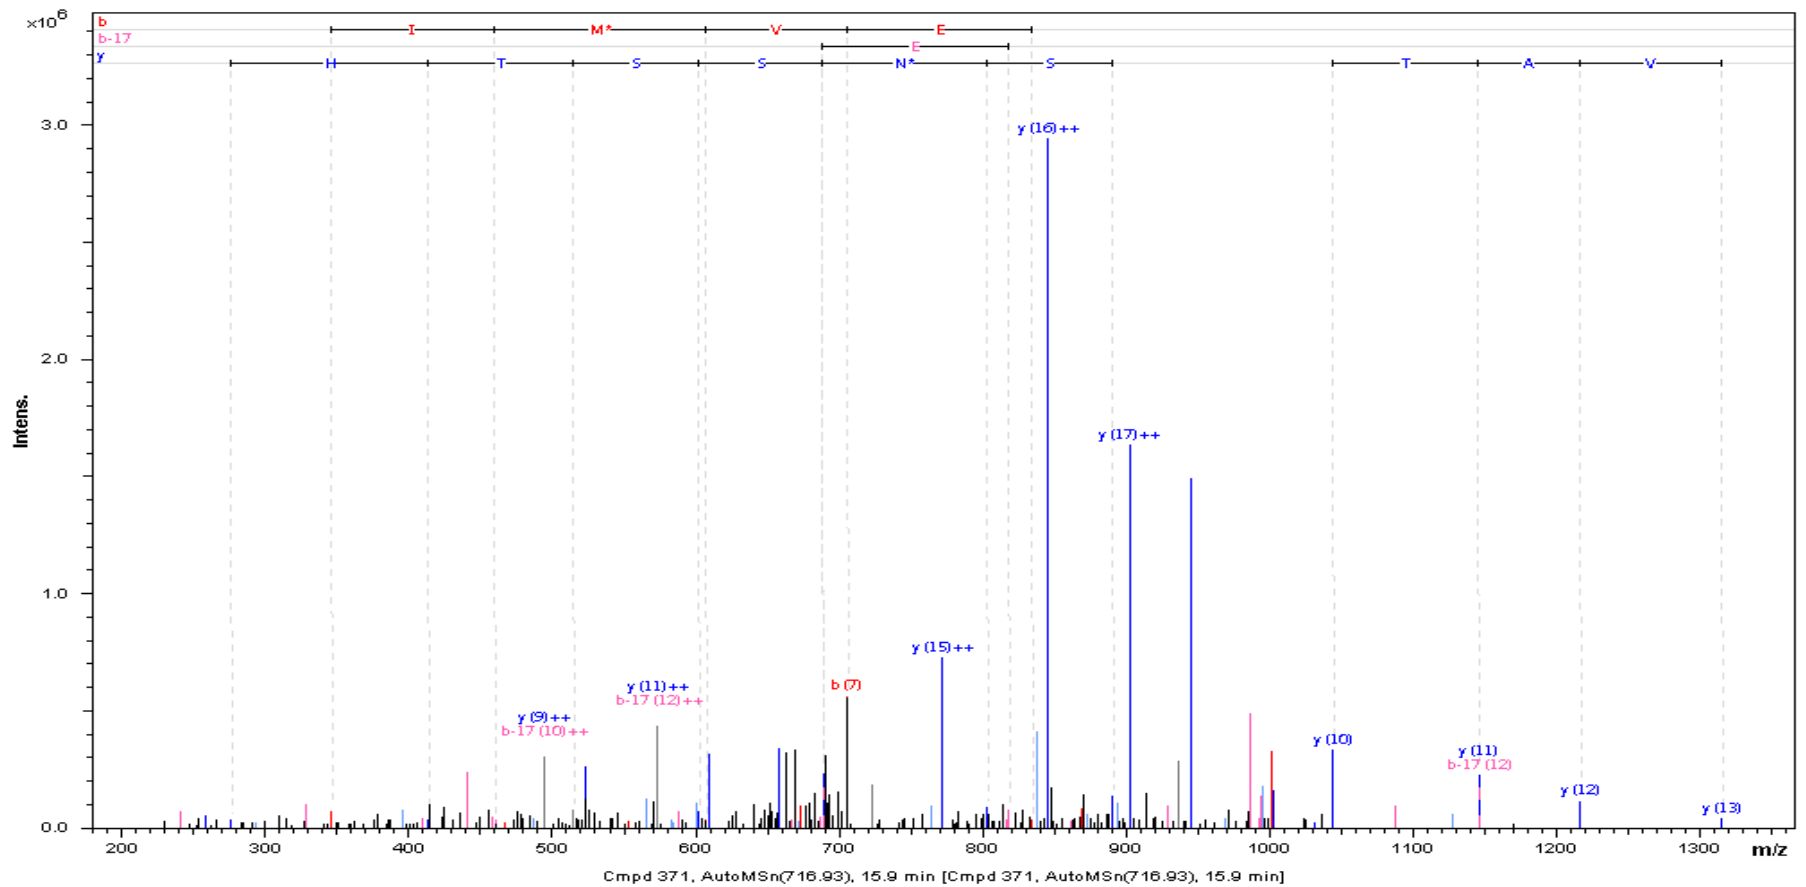



Suppressor of G2 allele of SKP1 homolog

R.CQEIQNGSESEVSASQR.T

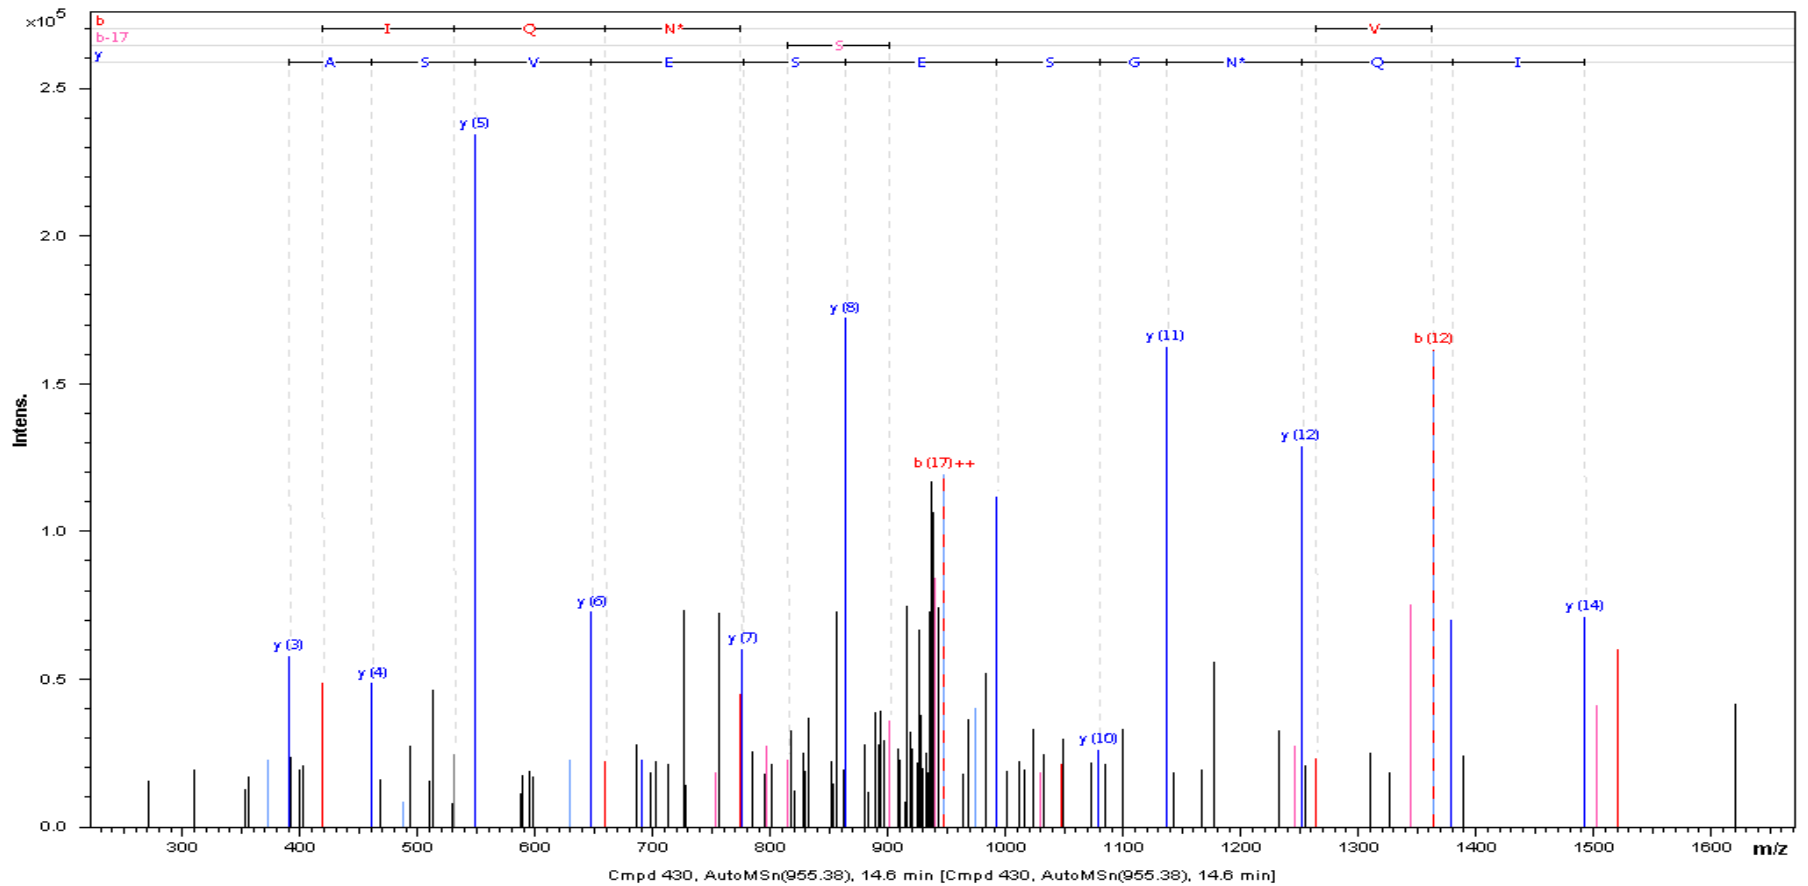

Synaptophysin-like protein 1

K.NQTVTATFGYPFR.L

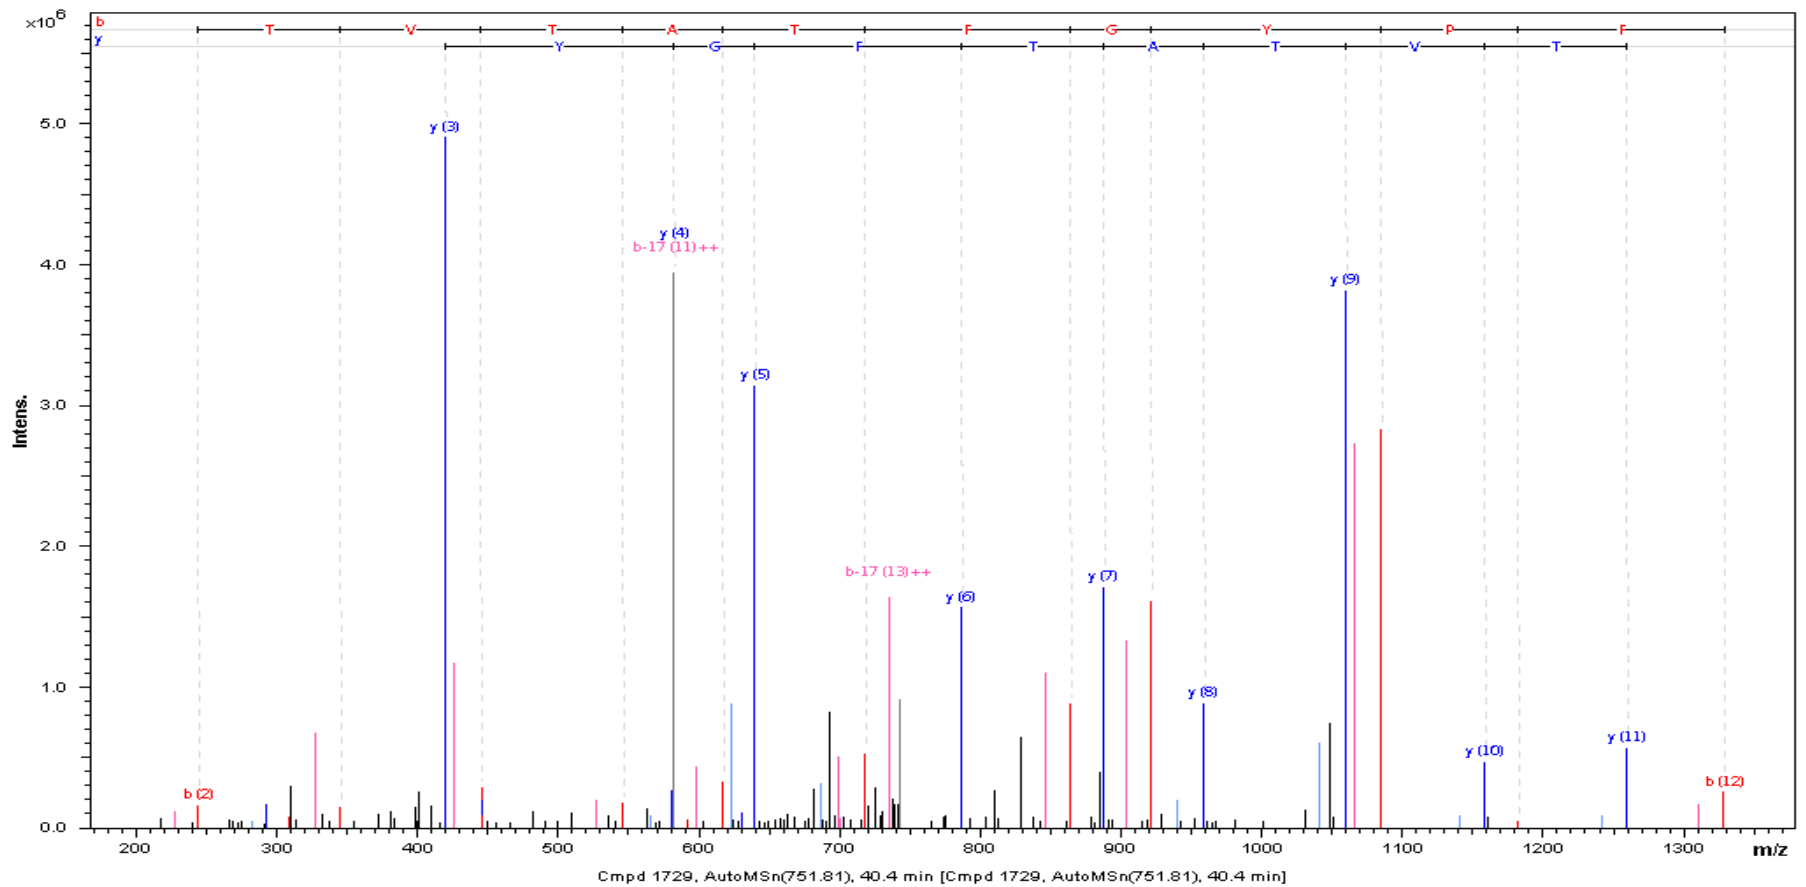

Testisin precursor

K.LSSPVTYNNFIQ**P**ICLLN**STYK**.F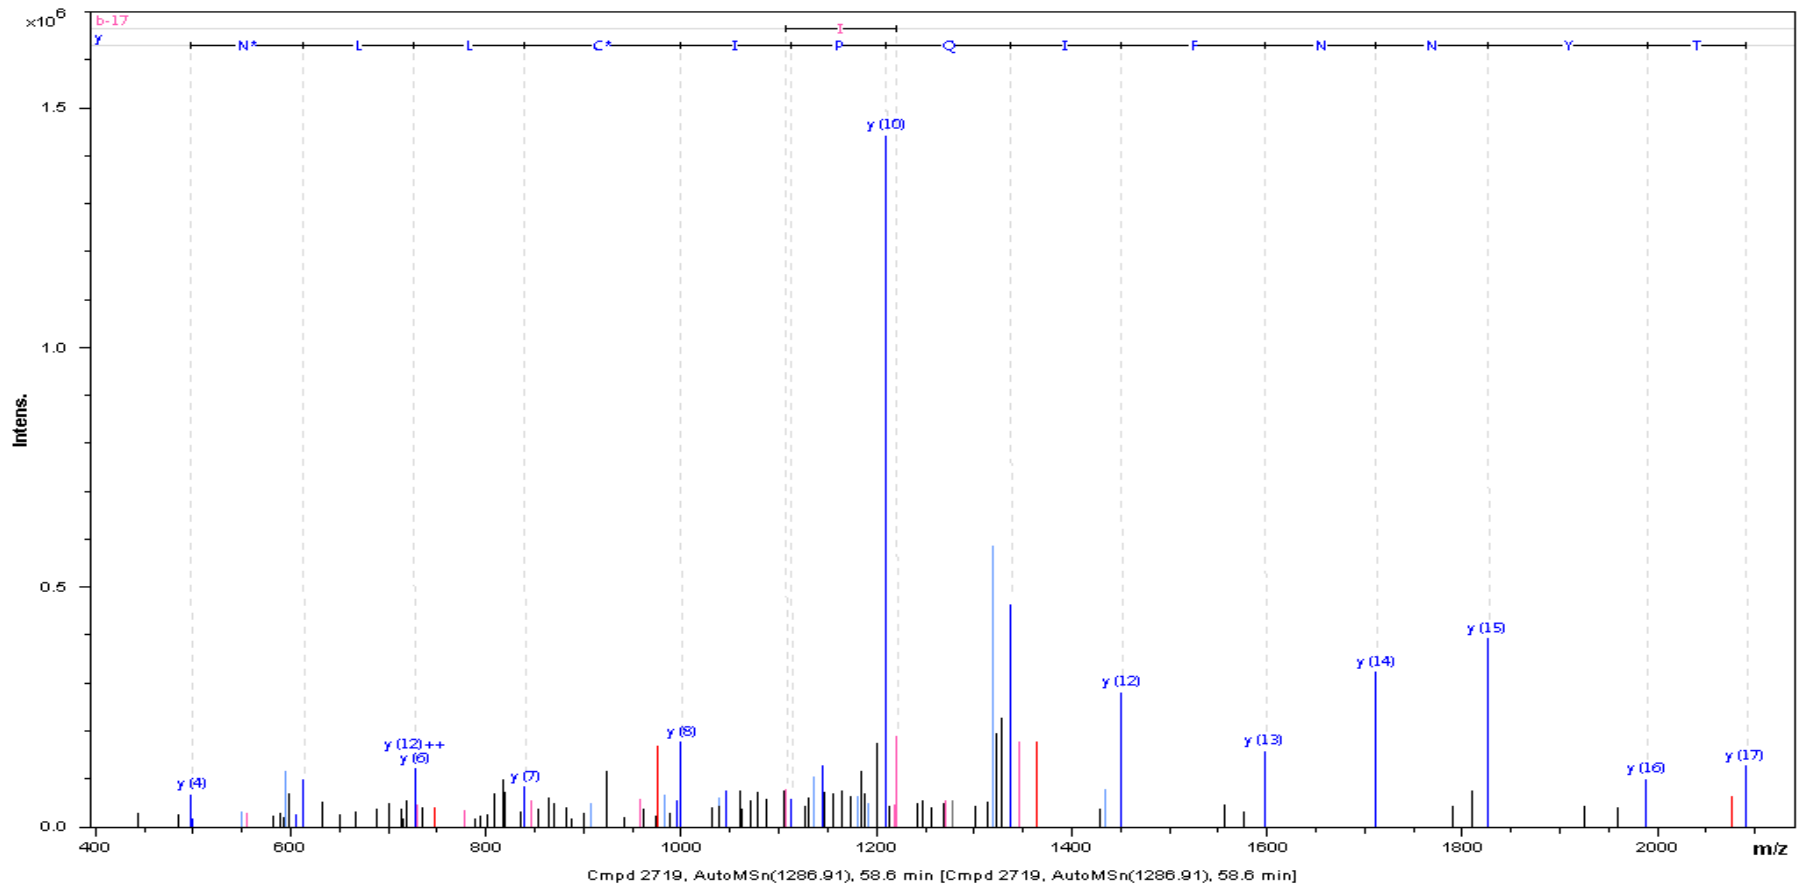

Testis-expressed sequence 29 protein

K.FAVCDIPLYDICDYNVTR.E

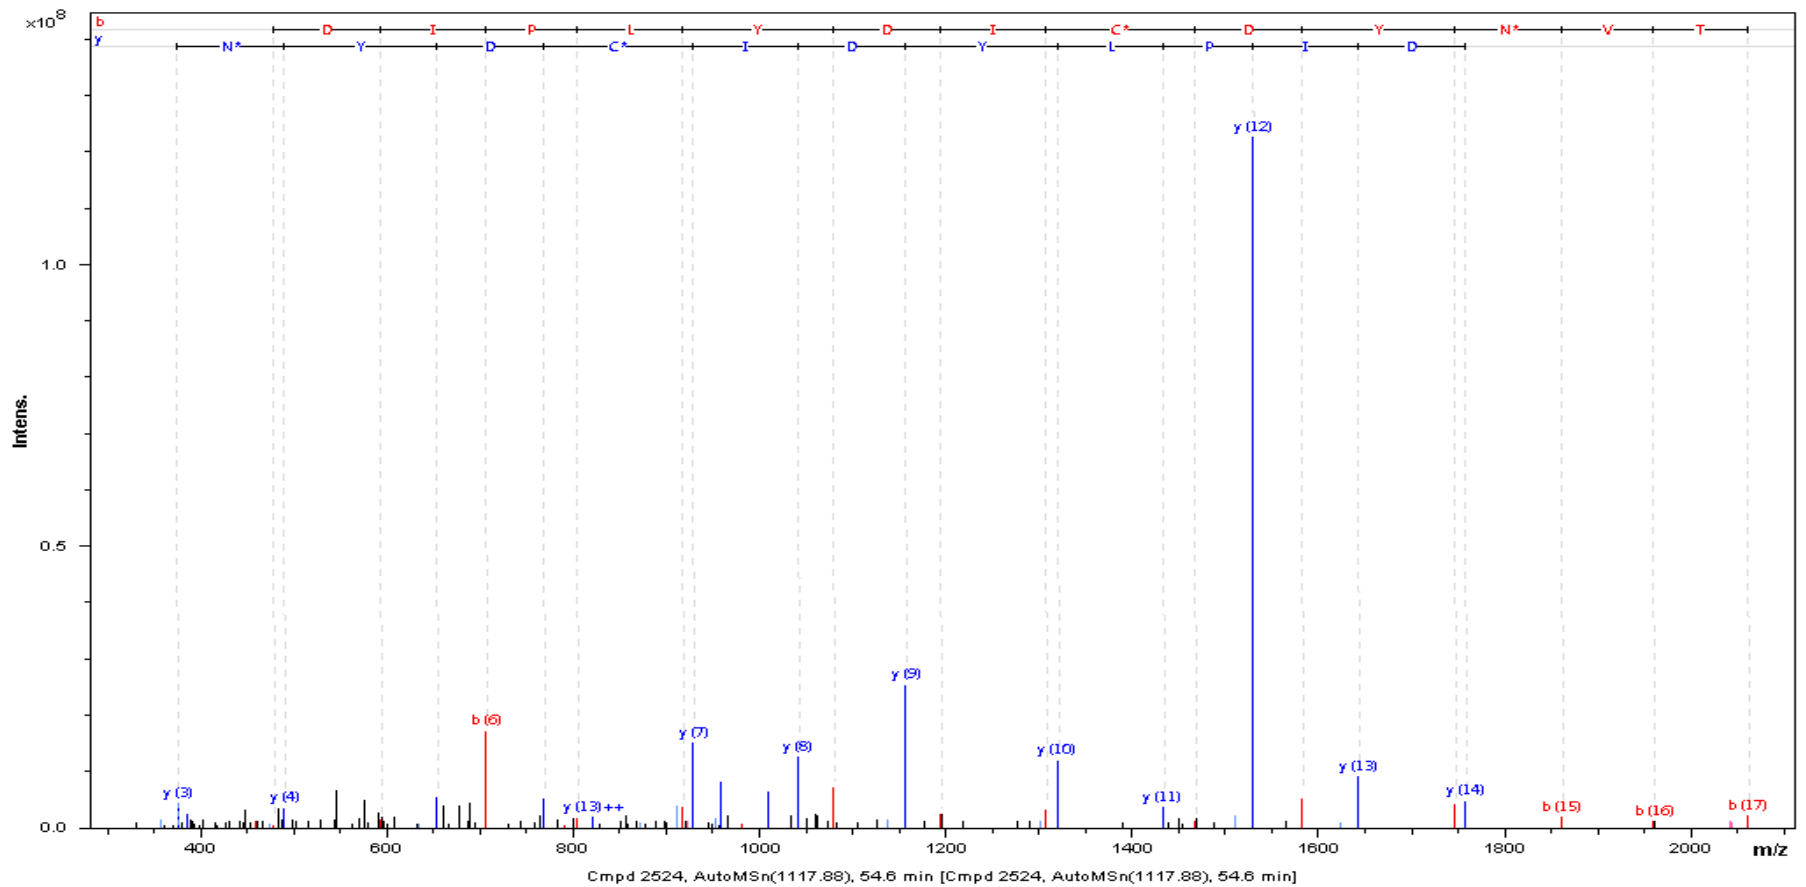

Transmembrane protease serine 12

R.EEGNGTTILQEAK.V

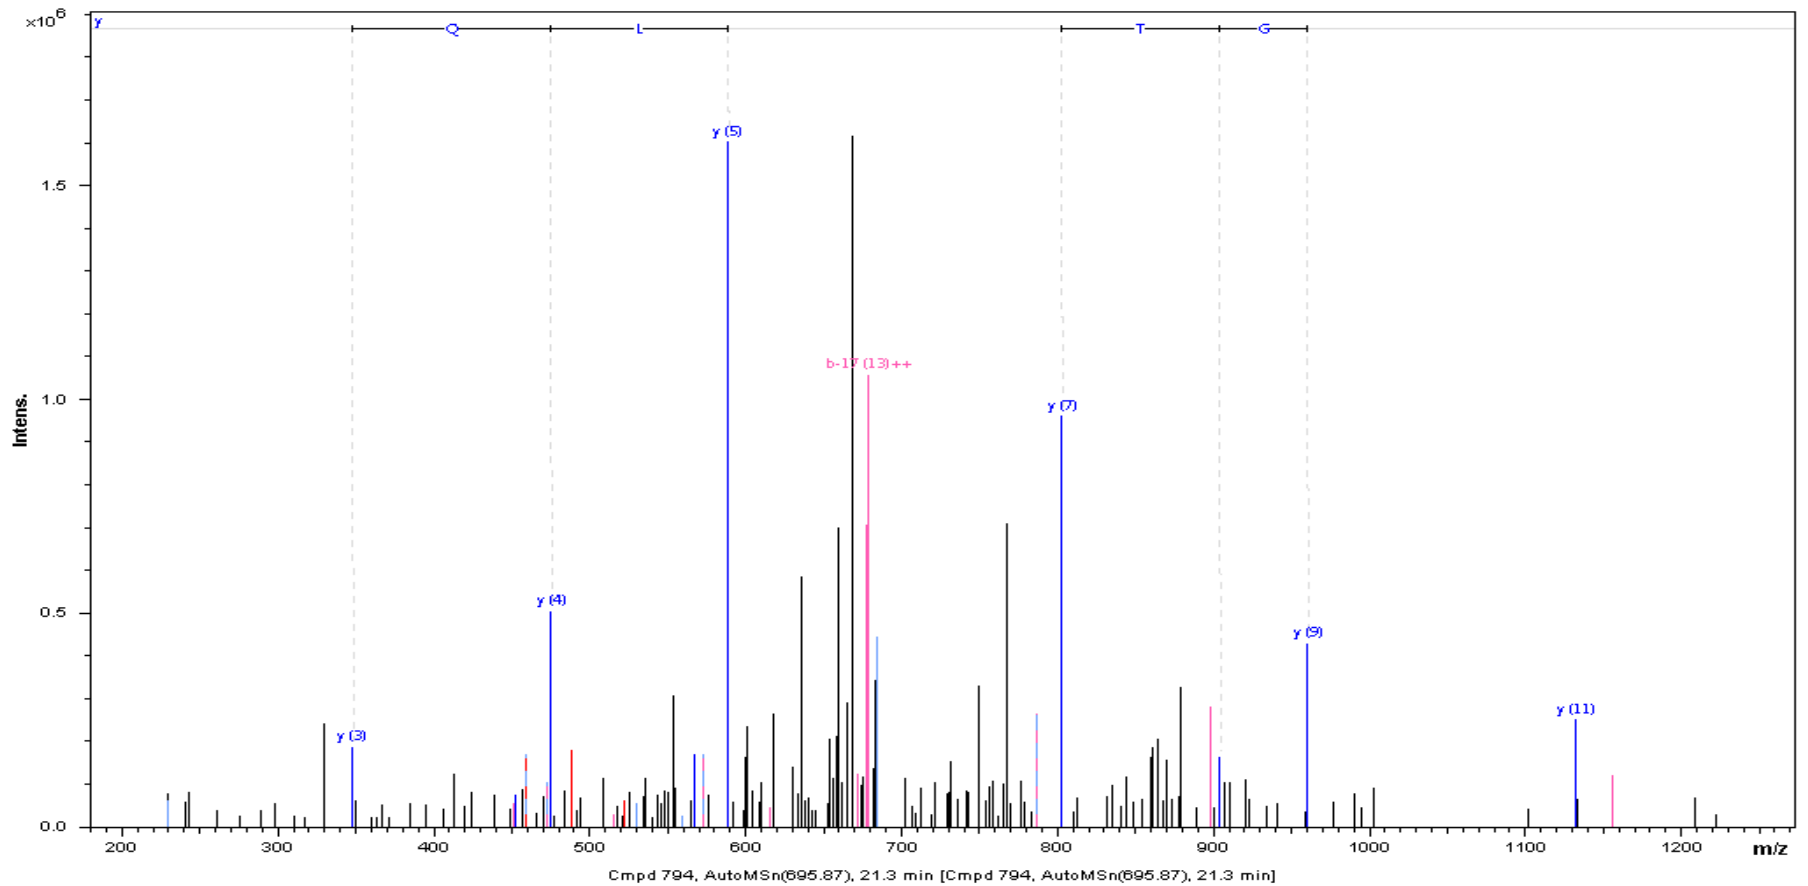

Testis-expressed protein 101 precursor

R.HCPTCVALGSCSSAPSMPCANGTTQCYQGR.L

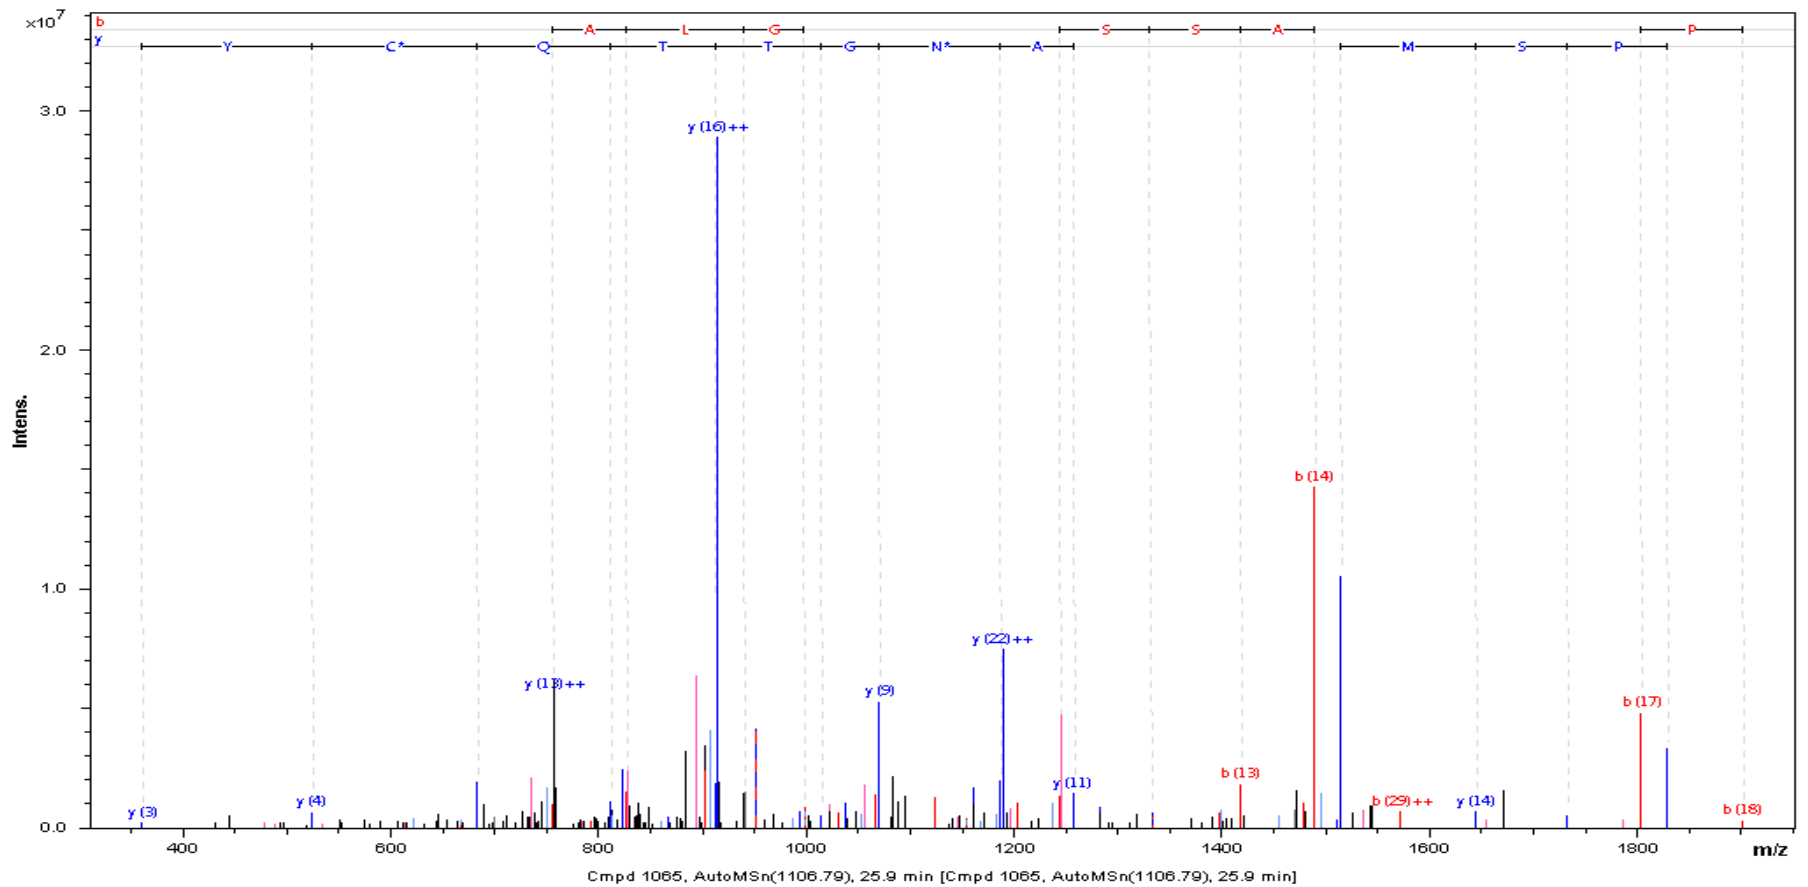

Testis-expressed protein 101 precursor

R.TFNWTSK.A

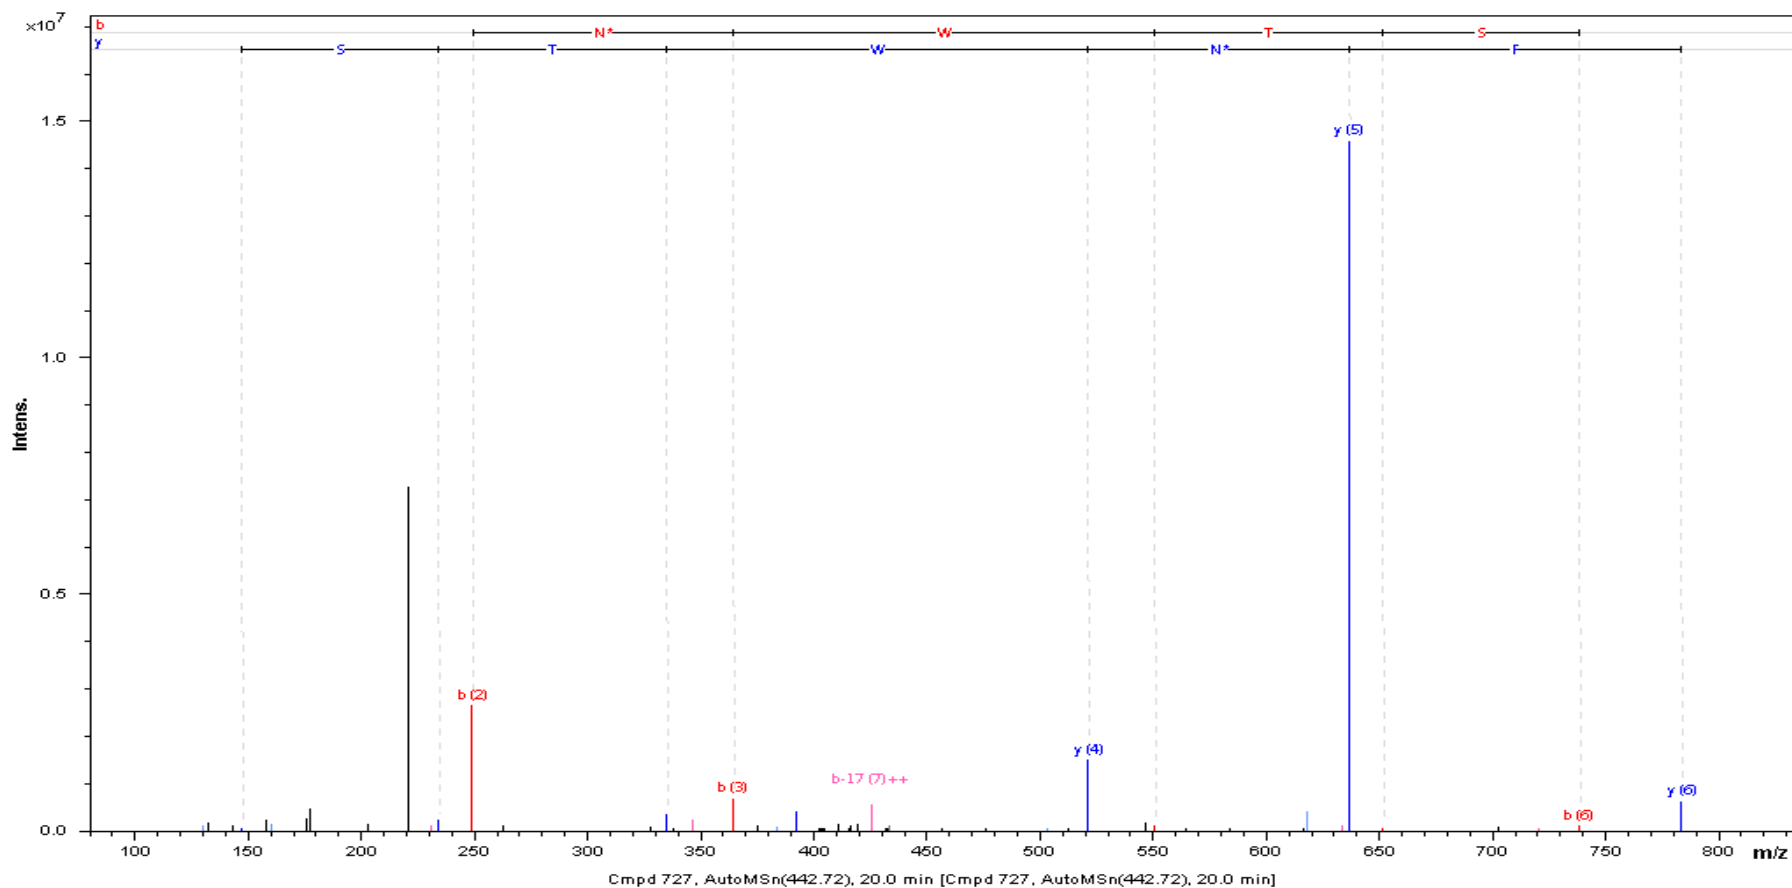

Testis-expressed protein 101 precursor

R.VPETTATSNMSGTR.H

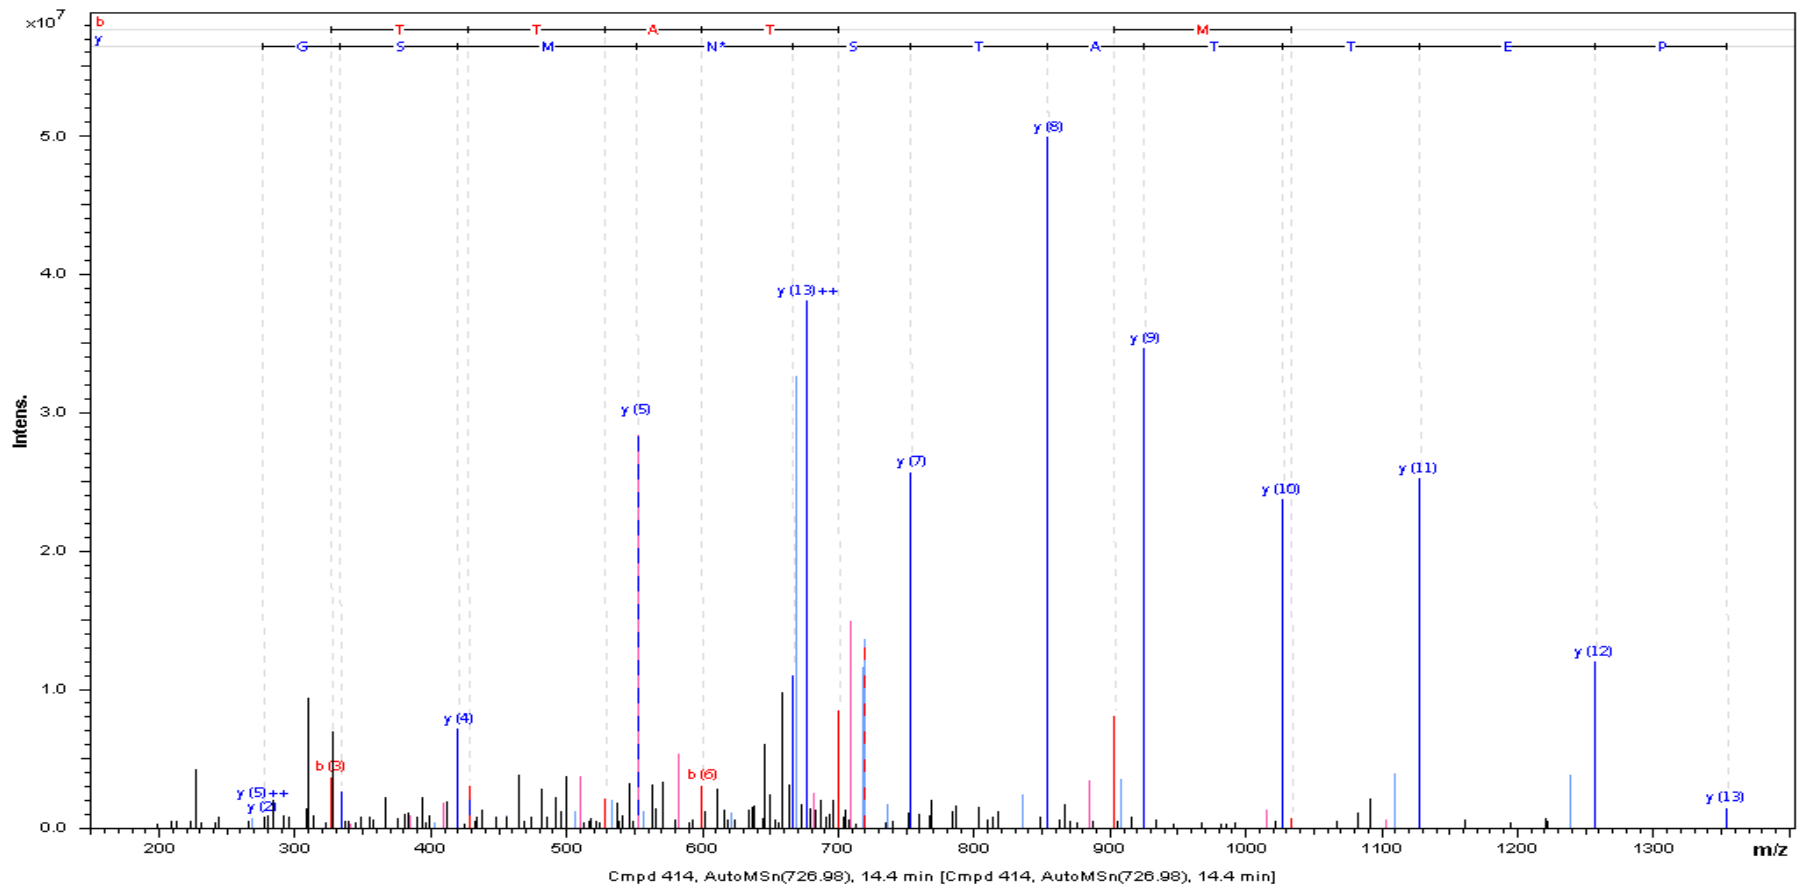



Ubiquitin carboxyl-terminal hydrolase 7

R.ITQNPVINGNVTLSDGHSNAEEDMEDDTSWR.S \*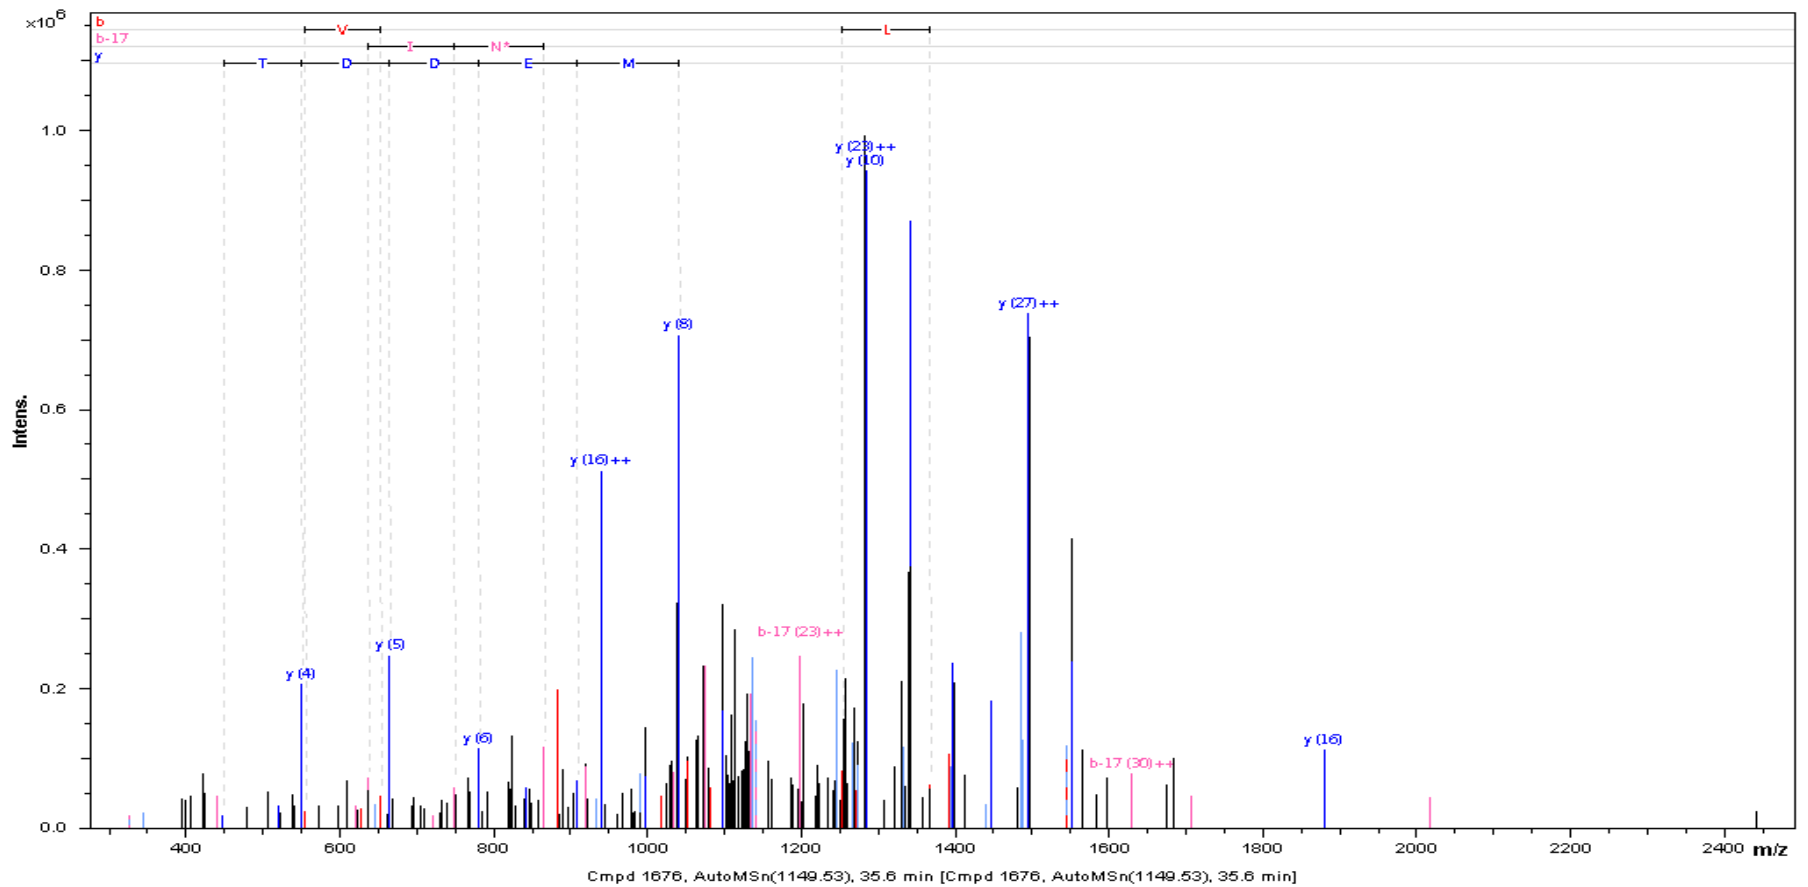

Zonadhesin precursor

K.CPLGTECKDSVDGGSNCTK.I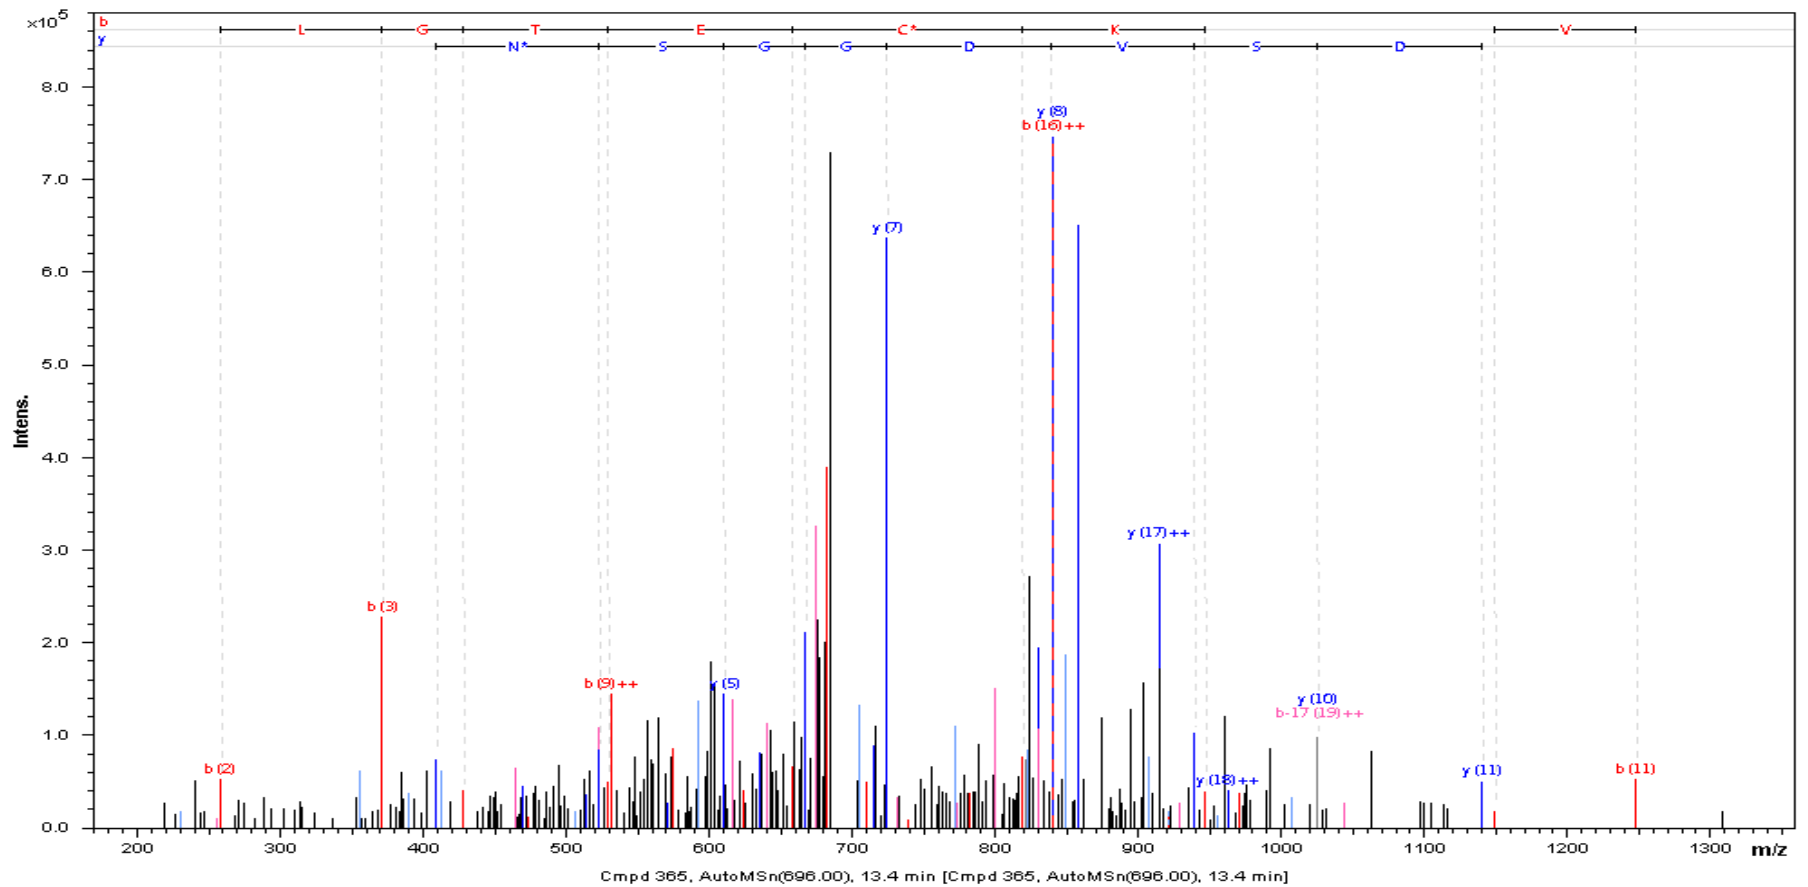

Zonadhesin precursor

K.DAQGDLIPANK.T

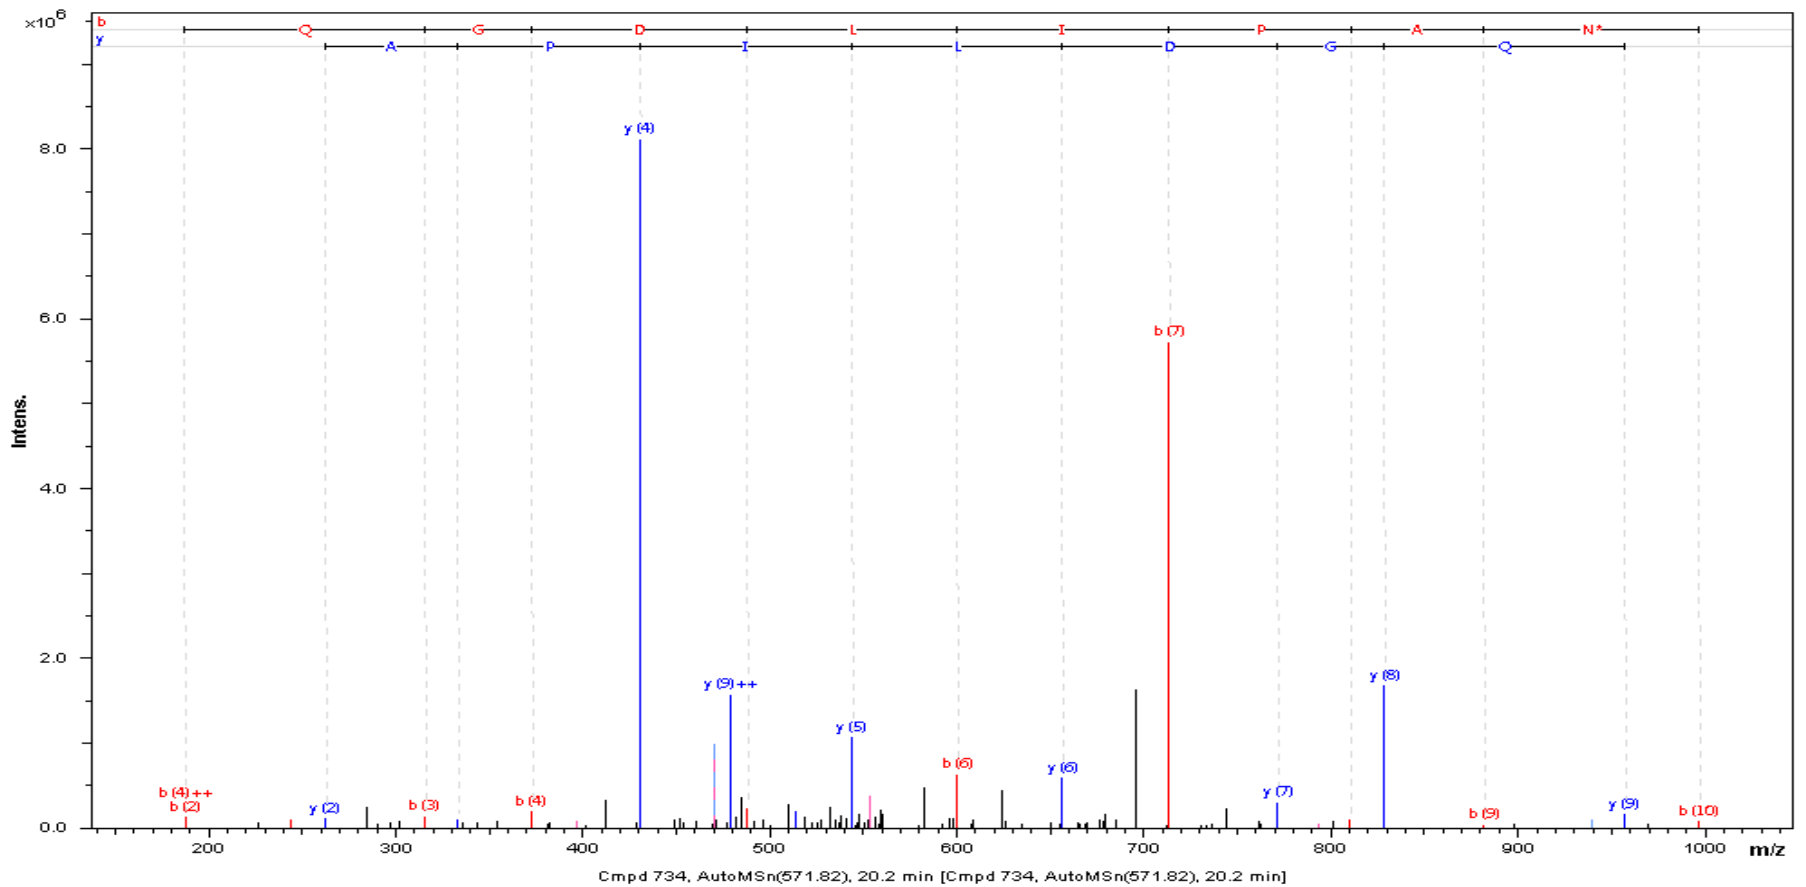

Zonadhesin precursor

K.DGSSNCTNIPLQCPAHSR.Y

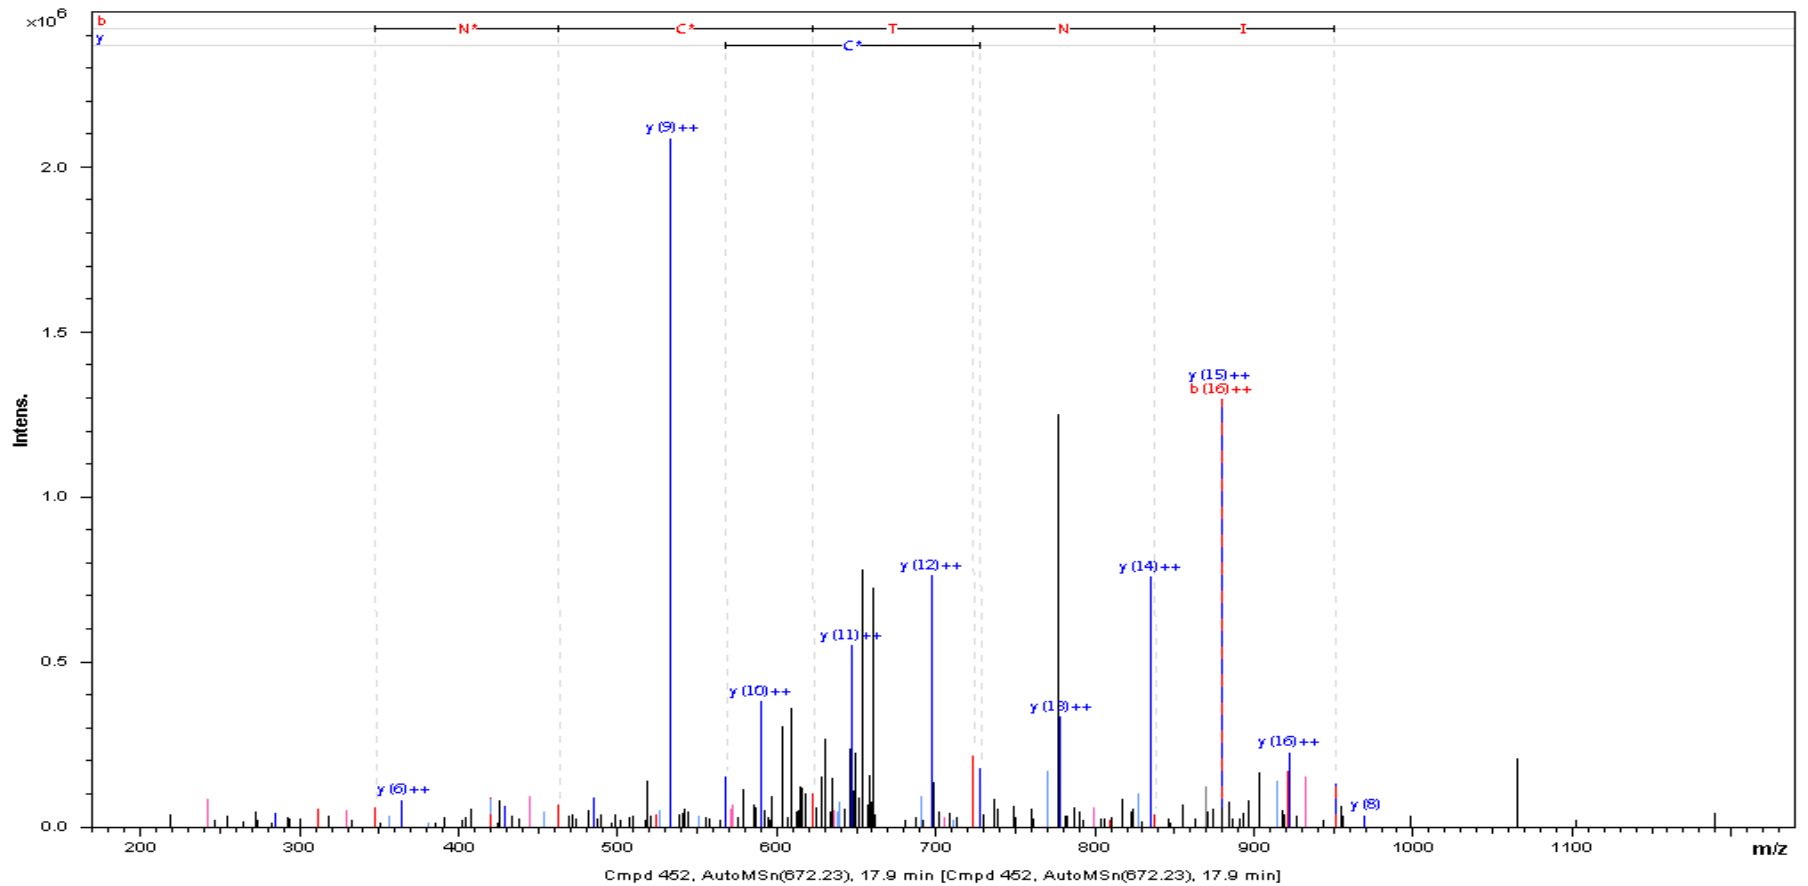

Zonadhesin precursor

K.FQCPSETYCKDIEDGNSNCTR.I

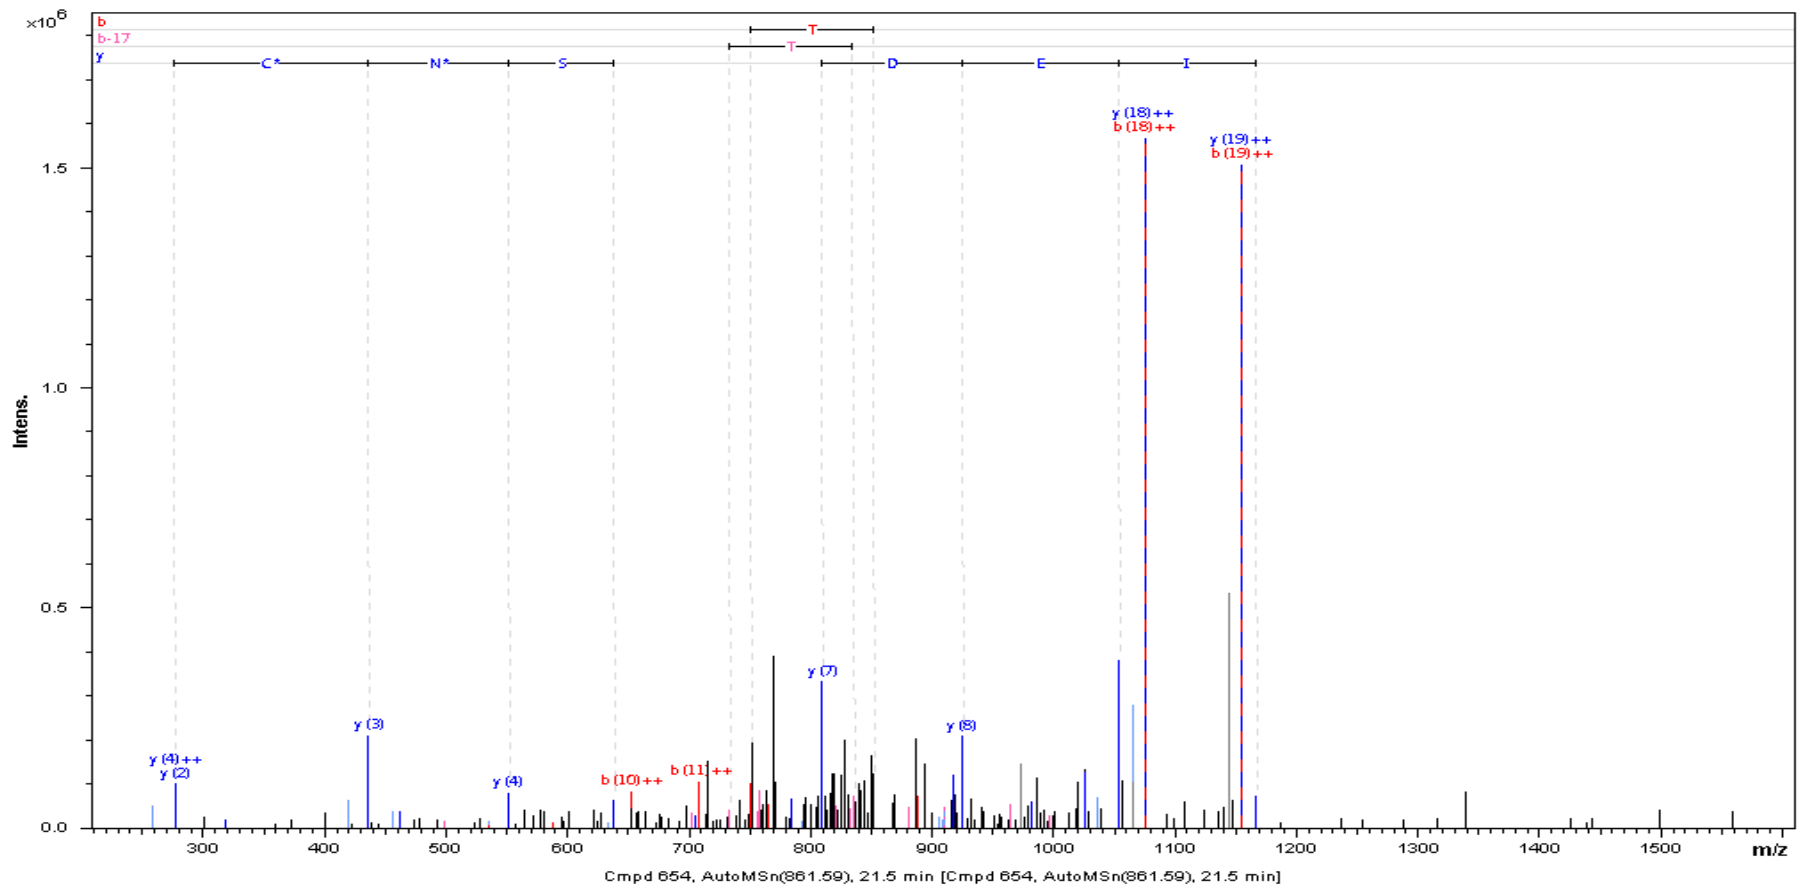

Zonadhesin precursor

K.TCTTLCTCSAHSNITCSPTACK.A

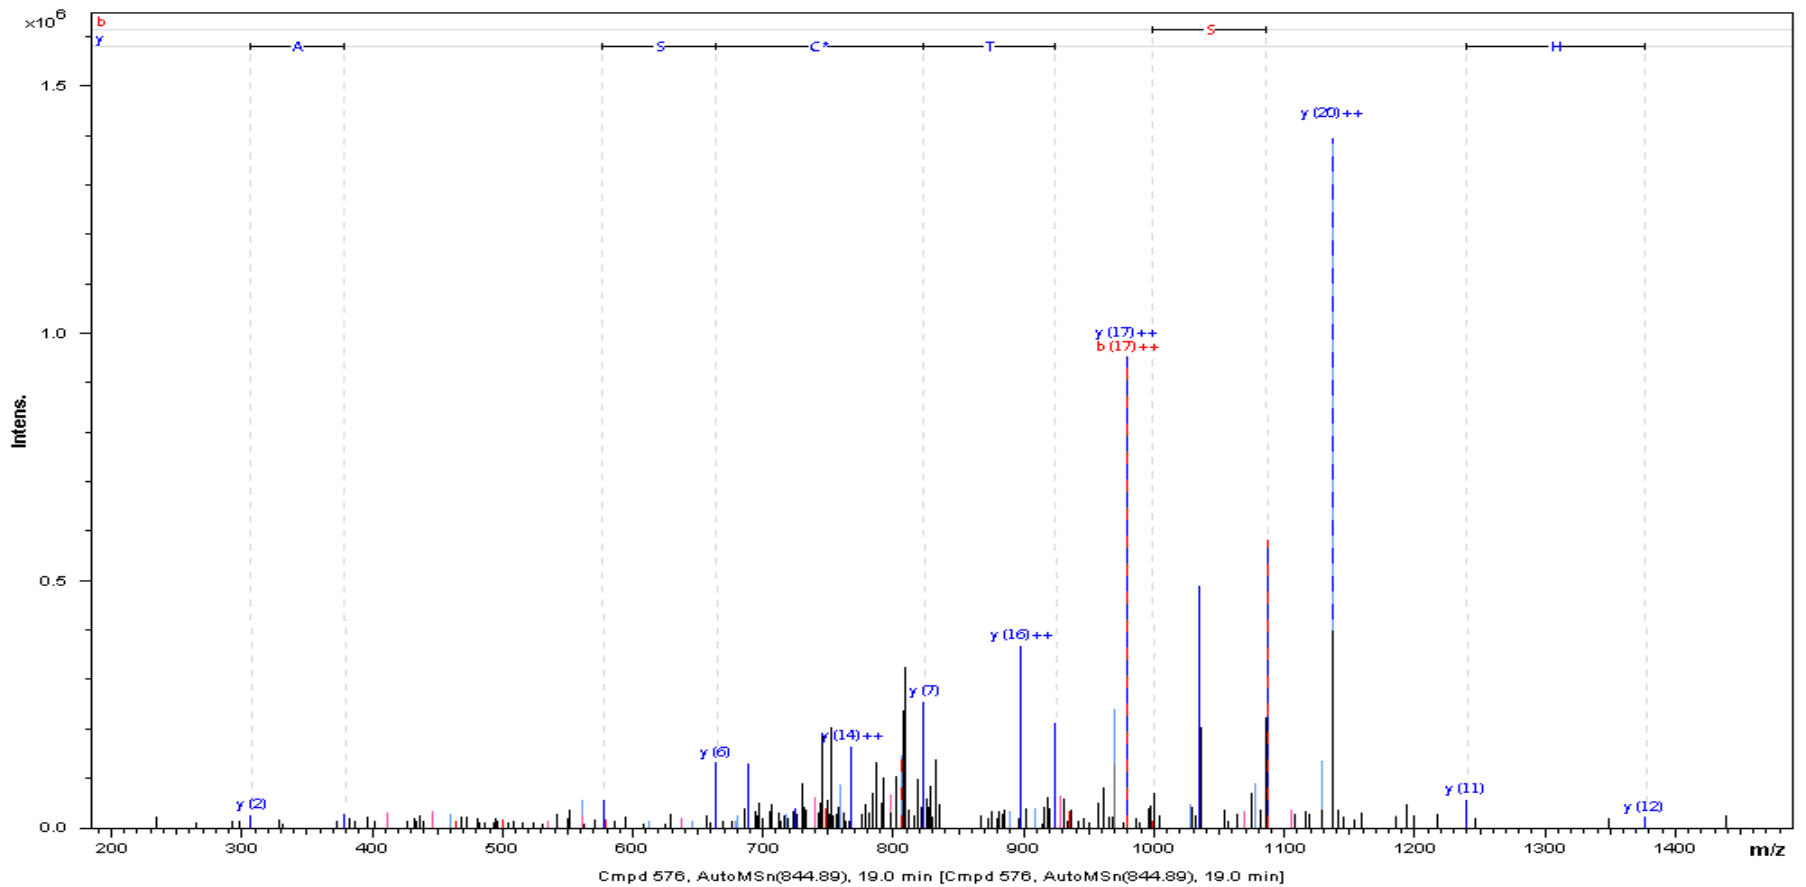

Zonadhesin precursor

R.VGSQSSGWMNSSVTIPK.G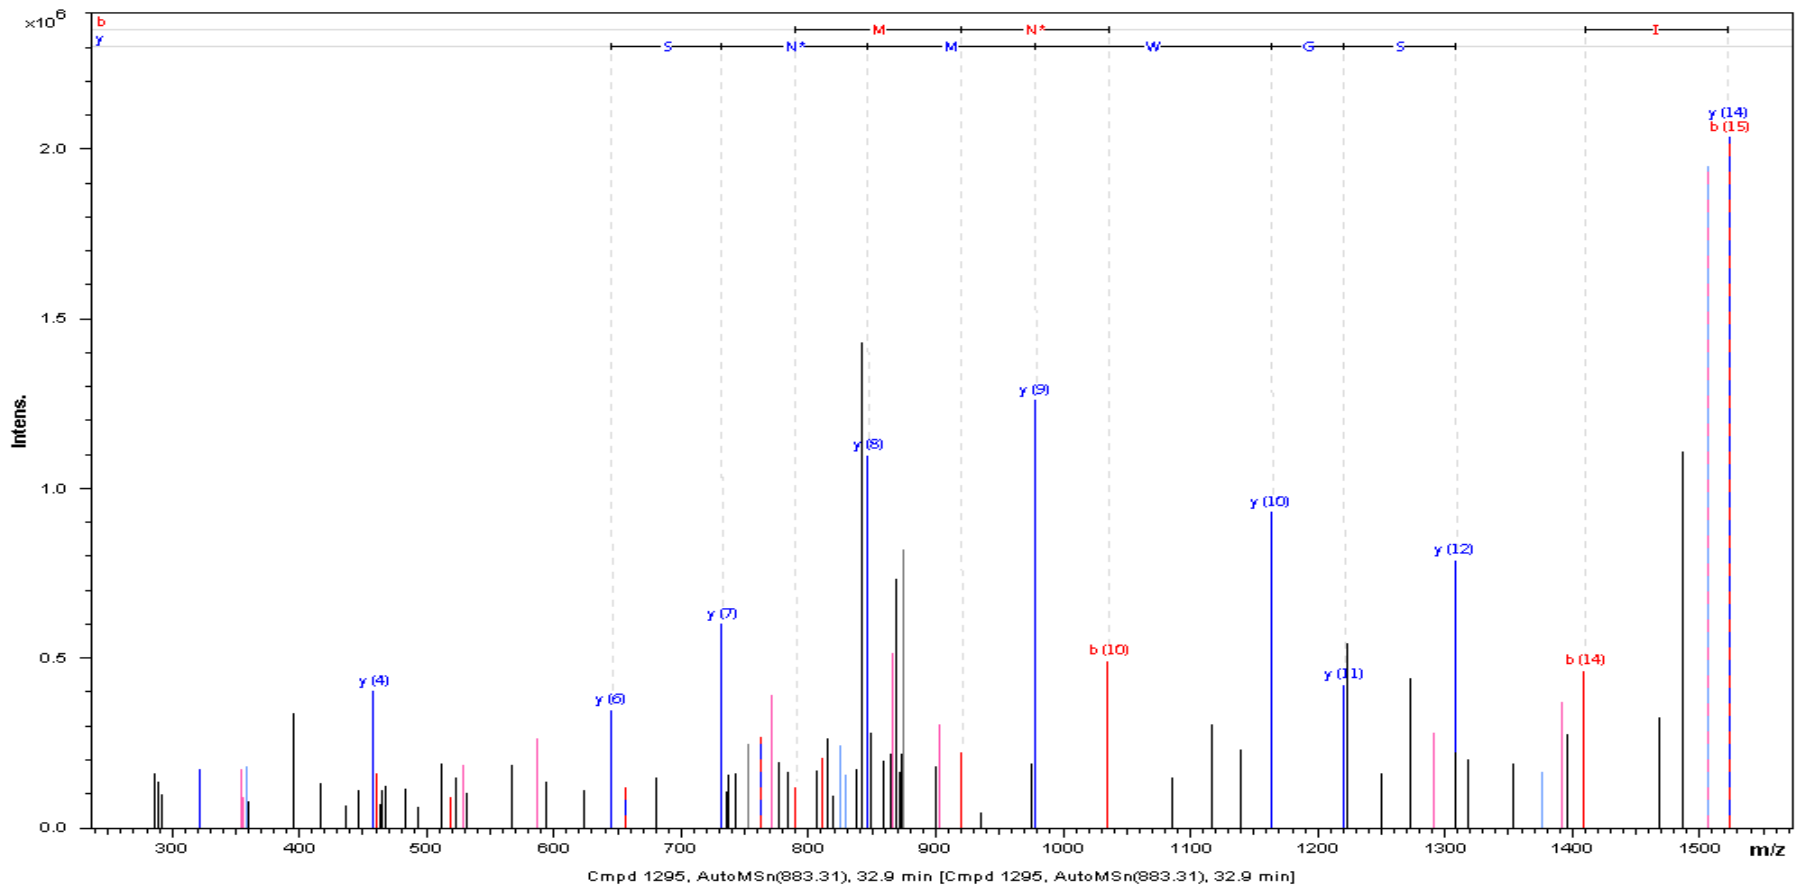

Zona pellucida sperm-binding protein 3 receptor precursor

K.GVCLKPMVINGNLSVER.V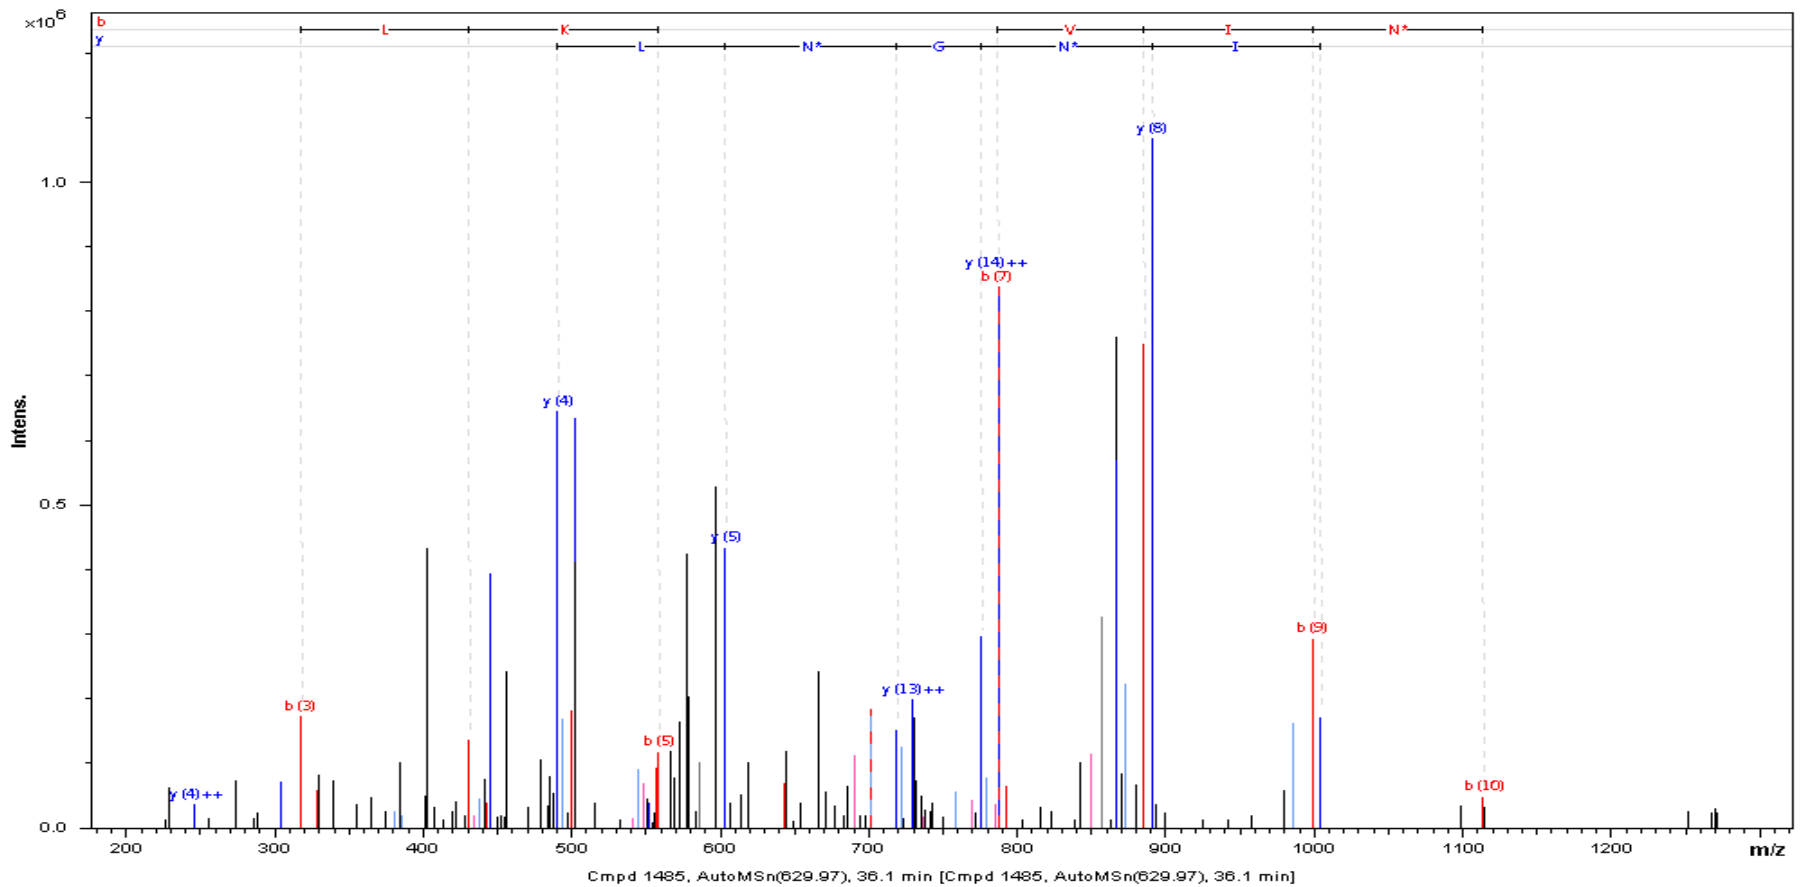



Zona pellucida sperm-binding protein 3 receptor precursor

K.TYLFGHEENSTEHAMK.G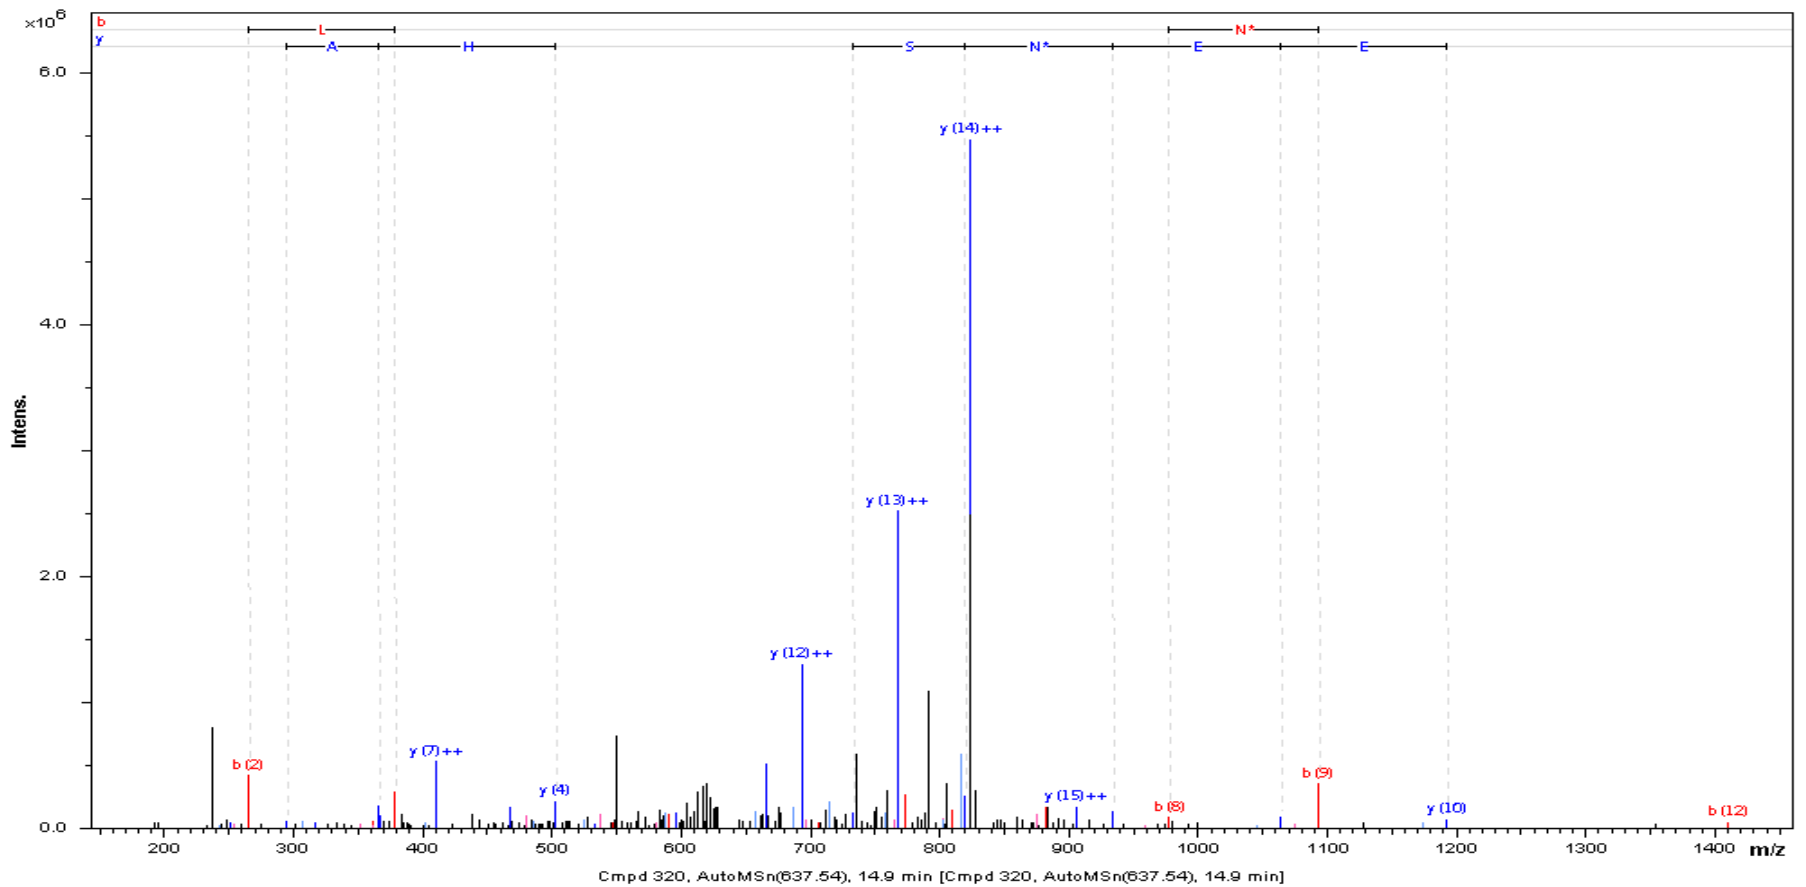

Zona pellucida sperm-binding protein 3 receptor precursor

R.ASLNDPQTVTCQENLTWSSTNGCER.I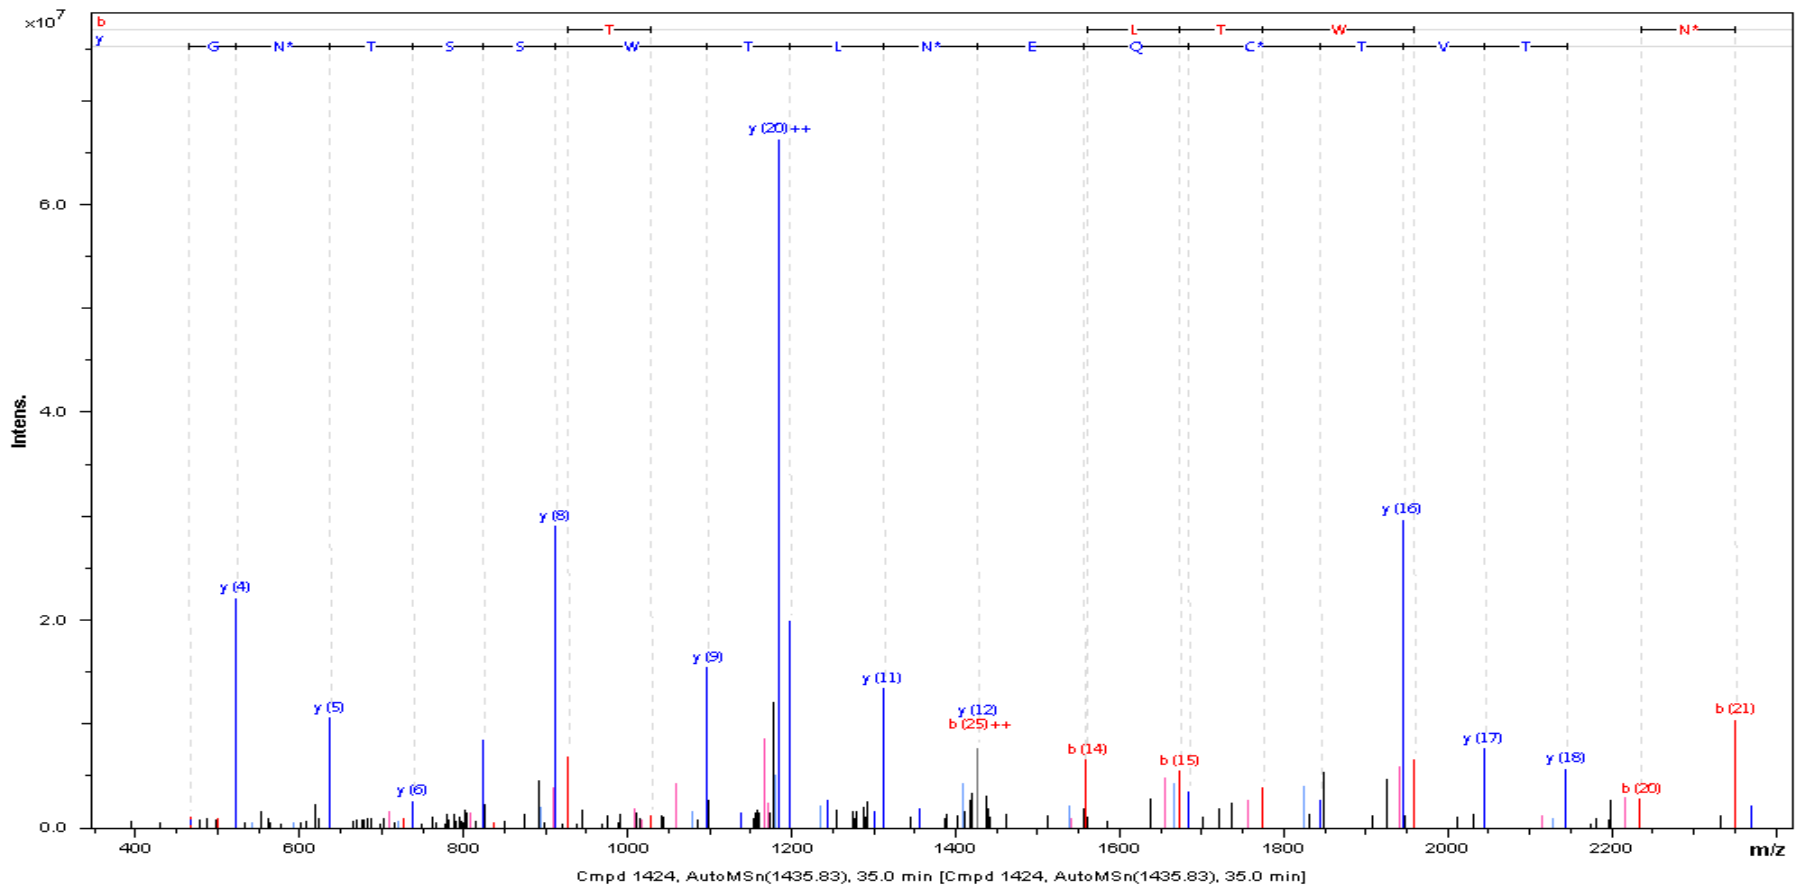

Zona pellucida sperm-binding protein 3 receptor precursor

R.LALFTFPNISETVTNK.T \*

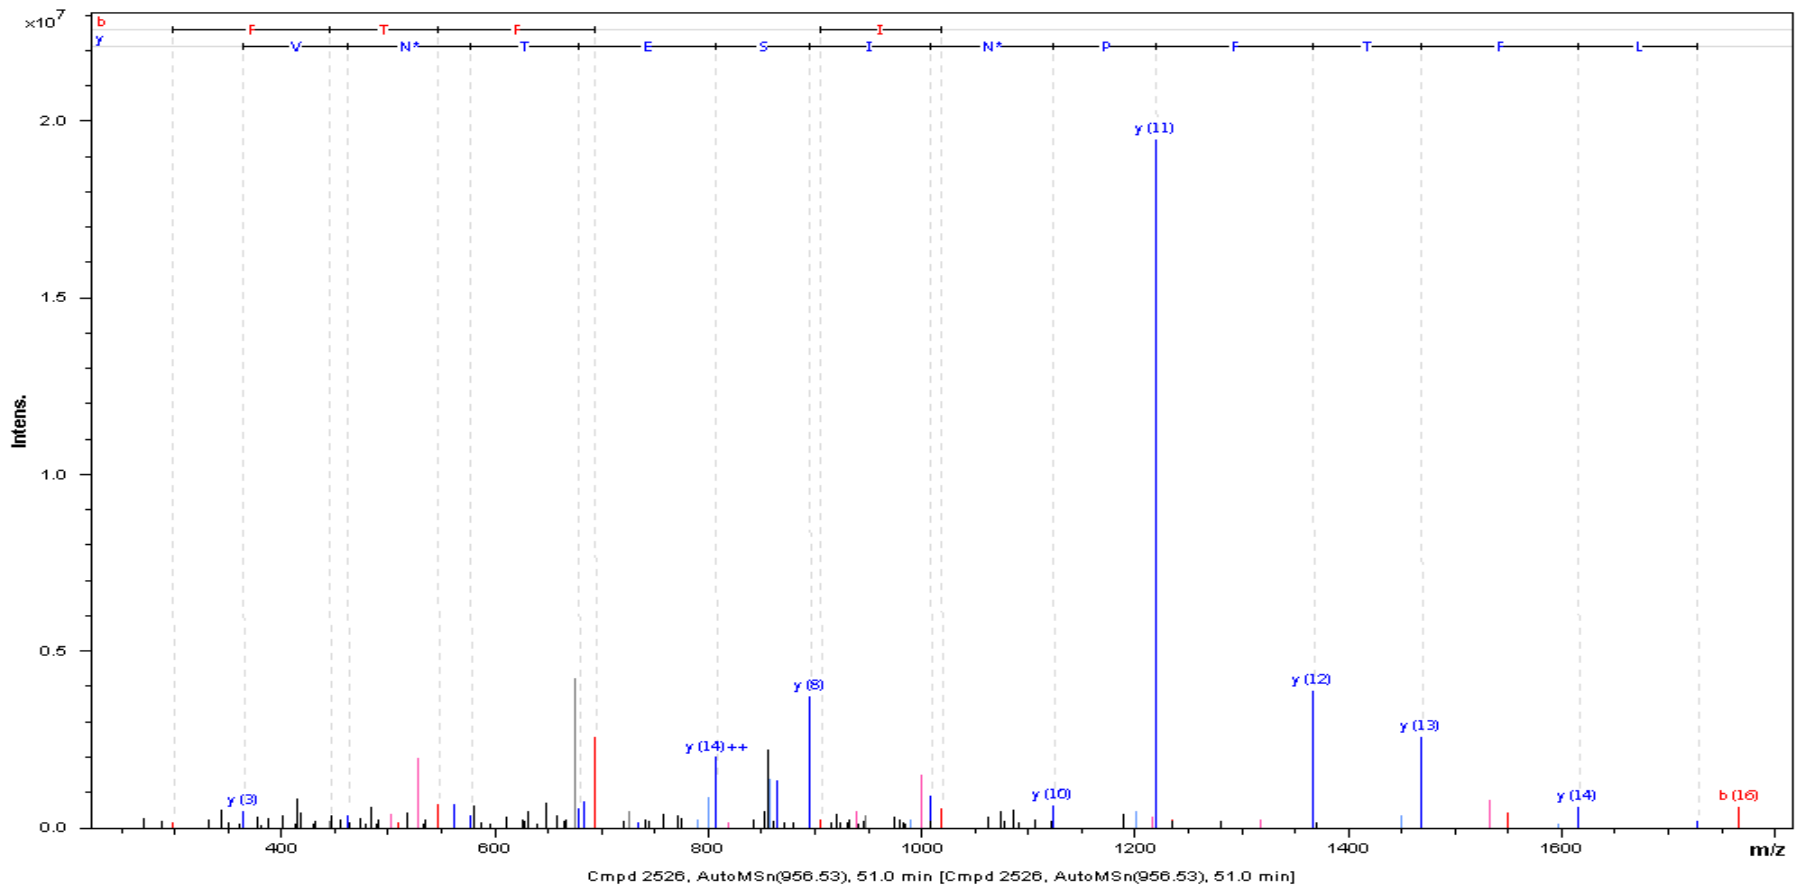

Zona pellucida sperm-binding protein 3 receptor precursor

R.VNSSHLSCDENGSWVYSTFCAR.K \*

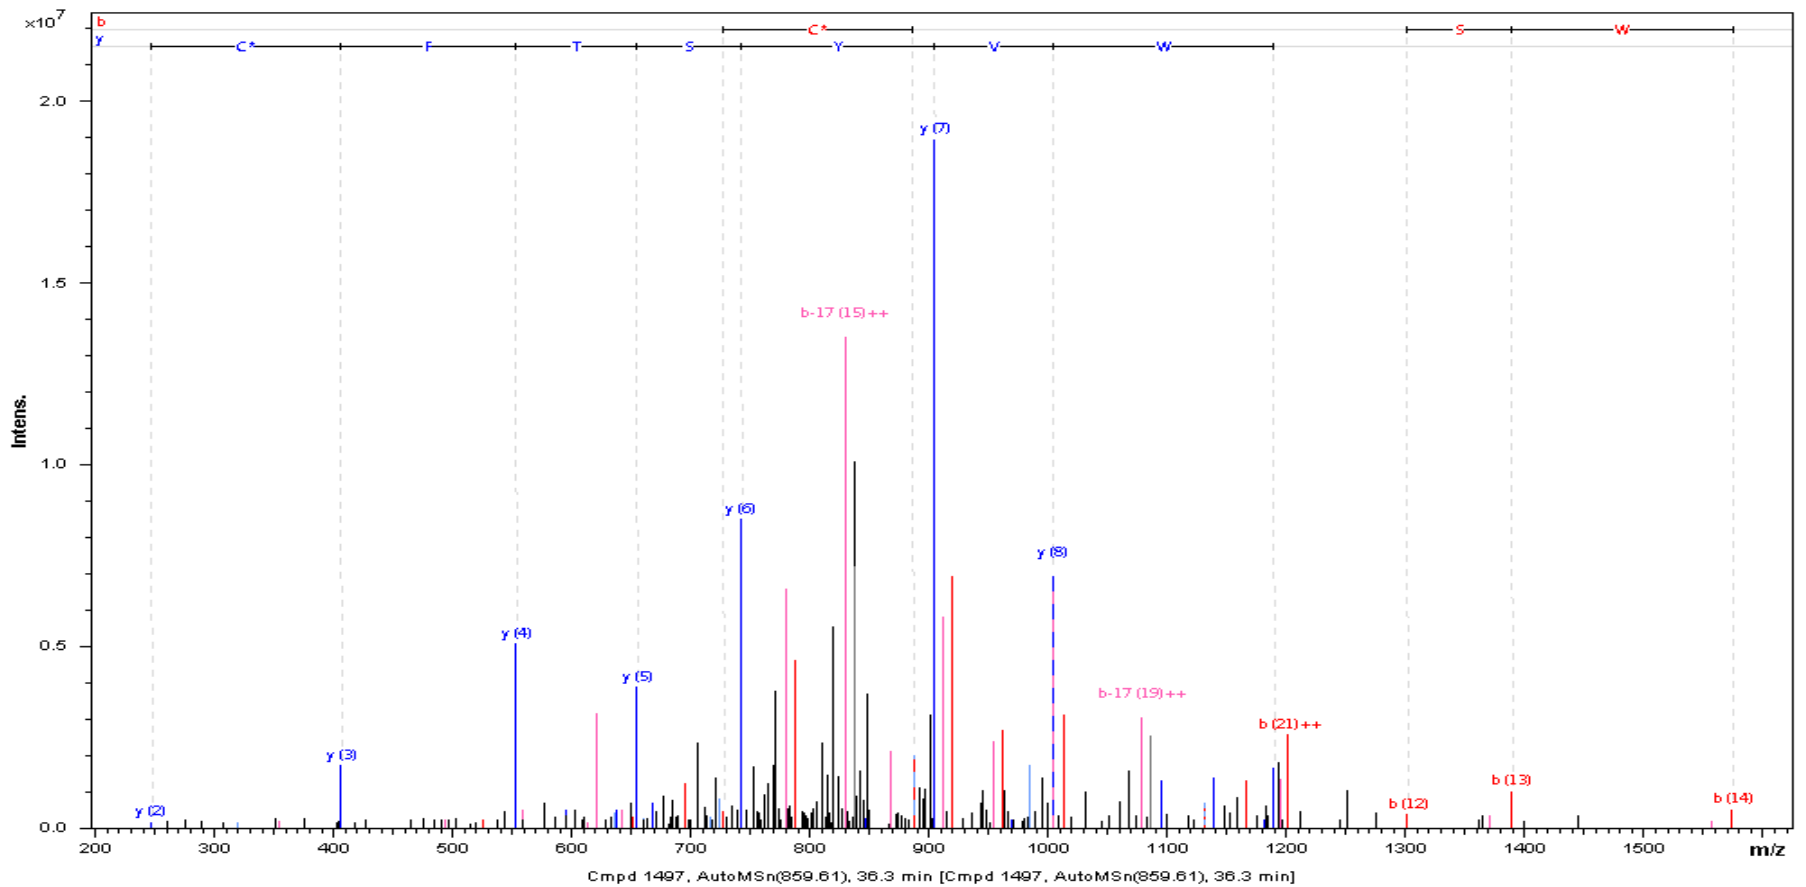

Zona pellucida-binding protein 1 precursor

R.DGTHCLQCNNSLVYGAK.T \*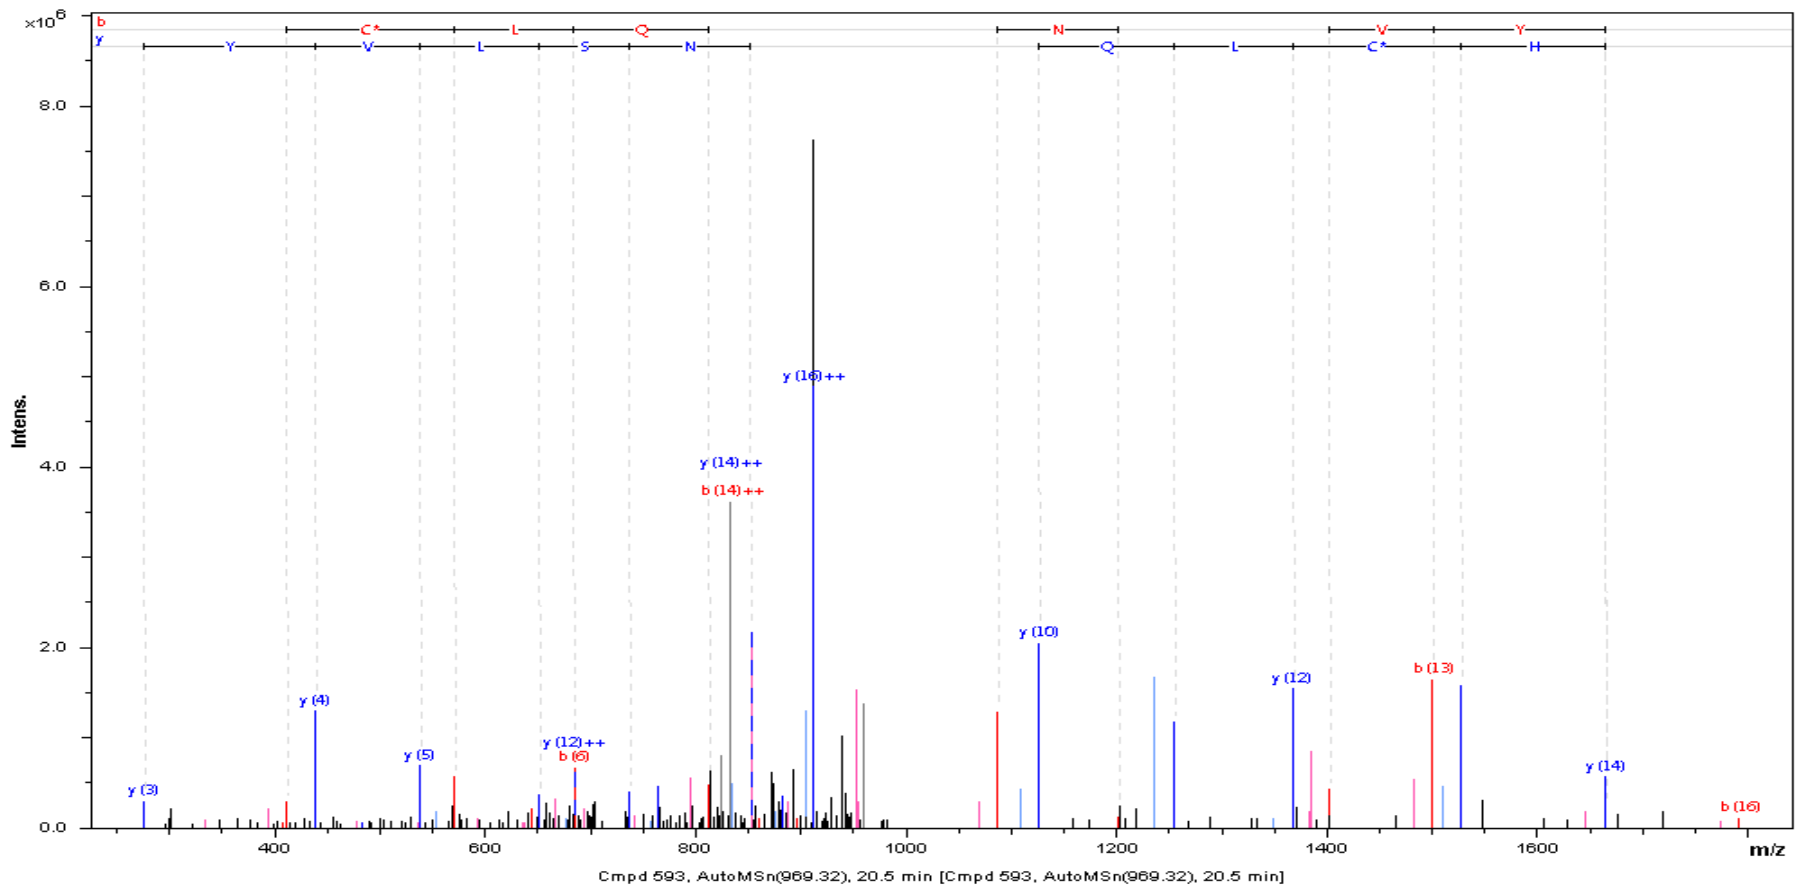

Zona pellucida-binding protein 2

K.GNSQINITNTGELVLK.D \*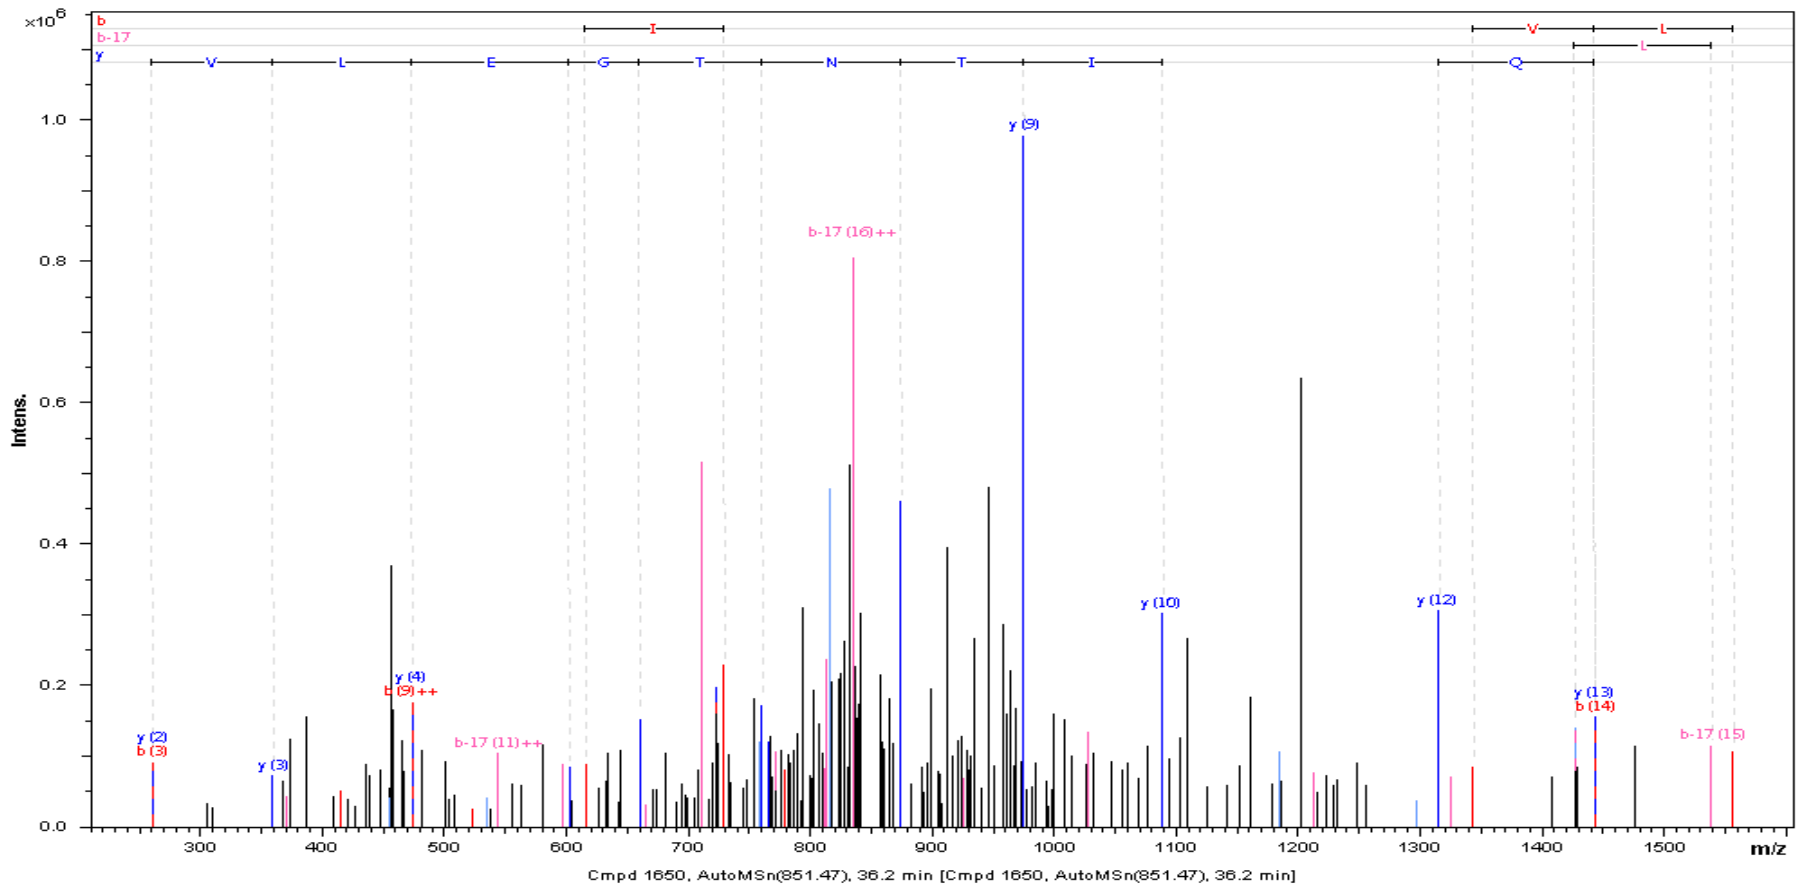

Supplement: 160445_1_supp_569631_qdwd45.pdf [file 160445_1_supp_569631_qdwd45.pdf]
